# Supplementary material for: Constraints-based analysis identifies NAD+ recycling through metabolic reprogramming in antibiotic resistant Chromobacterium violaceum
Source: PLoS One. 2019 Jan 4;14(1):e0210008. doi: 10.1371/journal.pone.0210008 (PMC6319732; doi:10.1371/journal.pone.0210008)
Supplement: S1 Table — Supporting information related to the simulations done using the genome scale metabolic model of C. violaceum, iDB858 using COBRA Toolbox as described in material and methods. (XLSX) [file pone.0210008.s002.xlsx]

## Sheet: Read Me
Genome-scale integrative modeling reveals decoupled redox and ATP synthesis function of ETC in antibiotic resistant Chromobacterium violaceum
Deepanwita Banerjee1 and Anu Raghunathan1,*
From the 1Chemical Engineering Division, CSIR-National Chemical Laboratory, Pune, Maharashtra, India
Running Title: GSMM reveals decoupled ETC in antibiotic resistant C. violaceum
*anu.raghunathan@ncl.res.in
S1 Table. Supporting large tables and datasets. Supporting information related to the simulations done using the genome scale metabolic model of C. violaceum, iDB858 using COBRA Toolbox as described in material and methods.
Description	Location	Labels
Model statistics for iDB858	Sheet 1	Statistics
Constraints used in this study for different population of CV in the presence or absence of antibiotic	Sheet 3	Constraints
Subsysytems in iDB858	Sheet 2	Subsystems
Metabolites in iDB858	Sheet 4	Metabolites
Reactions in iDB858	Sheet 5	Reactions
Genes in iDB858	Sheet 6	Genes
Key for Peg ID to CV ID changes	Sheet 7	PegTOCV
Literature evidence for genes present in iDB858	Sheet 8	GeneLiterature
BIOLOG Data predictions in comparison to legacy data	Sheet 9	BIOLOG
Experimental data for all 30 metabolites (ExMets) followed by in silico predictions	Sheet 10	EXMets
Single Gene Deletion analysis of iDB858	Sheet 11	singlegenedeletion
Synthetic Lethal pairs identified after Double Gene Deletion analysis of iDB858	Sheet 12	SyntheticLethalPairs
Synthetic Sick pairs identified after Double Gene Deletion analysis of iDB858	Sheet 13	SyntheticSickPairs
Complete FVA Analysis for different C. violaceum strains - WT, ChlR and StrpR using experimental constraints	Sheet 14	FVACVStrains
Complete FVA Analysis for WT C. violaceum in absence of antibiotic, in presence of chloramphenicol or streptomycin using experimental constraints	Sheet 15	FVAWTwithAntibiotic
Complete FVA Analysis for different C. violaceum strains in the presence of NADH oxidase (NOX)	Sheet 16	FVAwithNOX
FVA Key used in Main manuscript as well as this file
Flux Distribution	Category Number and color code
Positive fixed	1
Positive variable	2
0 to Positive	3
Negative fixed	4
Negative variable	5
0 to Negative	6
Positive variable, less than 0.0001 but greater than 0	7a
Negative variable, less than 0.0001 but greater than 0	7b
Reversible negligible	7c
0 to Positive, but less than 0.0001	7d
0 to Negative, but less than 0.0001	7e
Reversible	8
Blocked	9

## Sheet: Statistics
Reactions					GPR			Reversibility
	Internal	966		Single	564		Reversible	192
	Transport	157		Multiple	360		Irreversible	774
	Exchanges	189		None	42		Total	966
	Biomass	2		Total	966
	Demand	16
	Total	1330
Genes
	essential	191
	non essential	667
	Total	858
Metabolites
	Cytosolic	815
	External	189
	Total	1004

## Sheet: Constraints
Exchanges	lb	ub
EX_met_ala_e	0	1000000000			CONDITION +/- AB	LB + glc	Biomass	Glc	Oxygen	Expt Gr		LB + pyr	Biomass	pyr	Oxygen	Expt Gr		LB + succ	Biomass	succ	Oxygen	Expt Gr		LB + mal-L	Biomass	mal-L	Oxygen	Expt Gr
EX_val_L_e	0	1000000000			WITHOUT AB	WT	0.7055	-15	-9.7	0.7056		WT	0.576883	-30	-16.6	0.5769		WT	1.00165	-31.7	-38.7	1.0014		WT	0.603453	-29	-15.6	0.6036
EX_ala_leu_L_e	0	1000000000			CHL	ChlrR	0.208887	-8.1	-1.59	0.20988		ChlrR	1.2673	-40	-47	1.2468		ChlrR	1.47791	-42	-57	1.4778		ChlrR	2.2068	-88.1	-52.5	2.2068
EX_drib_e	0	1000000000			STRP	StrpR	1.80095	-22.01	-41.09	1.7976		StrpR	1.58178	-65.3	-47	1.5816		StrpR	1.53756	-41.9	-60	1.5372		StrpR	8.0003	-275	-200.15	8.55
EX_mg2_e	-1000000000	1000000000
EX_gly_cys_L_e	0	1000000000
EX_h_e	-1000000000	1000000000			WITH AB	LB + glc	Biomass	Glc	Oxygen	Expt Gr		LB + pyr	Biomass	pyr	Oxygen	Expt Gr		LB + succ	Biomass	succ	Oxygen	Expt Gr		LB + mal-L	Biomass	mal-L	Oxygen	Expt Gr
EX_metox_R_e	0	1000000000			CHL	WT+chl	0.000255	-0.494045	-2.89925	0.00025608		WT+chl	0.4091	-14.9076	-15.664	0.40908		WT+chl	0.0034	-3.17	-3.46	0.0033528		WT+chl	0.151	-6.50869	-6.85	0.15096
EX_na1_e	-1000000000	1000000000			STRP	WT+strp	0.0013	-1.005	-1.863	0.001341		WT+strp	-	-	-	0		WT+strp	-	-	-	0		WT+strp	-	-	-	0
EX_glu_L_e	0	1000000000
EX_lys_L_e	0	1000000000
EX_15dap_e	0	1000000000
EX_ins_e	0	1000000000
EX_k_e	-1000000000	1000000000
EX_zn2_e	-1000000000	1000000000
EX_pi_e	-1000000000	1000000000
EX_glyb_e	0	1000000000
EX_gly_tyr_L_e	0	1000000000
EX_so4_e	-1000000000	1000000000
EX_fum_e	0	1000000000
EX_spmd_e	0	1000000000
EX_pro_e	0	1000000000
EX_ser_D_e	0	1000000000
EX_glyc3p_e	0	1000000000
EX_his_L_e	0	1000000000
EX_cgly_e	0	1000000000
EX_ala_glu_L_e	0	1000000000
EX_met_L_e	0	1000000000
EX_glc_D_e	-10	1000
EX_gly_asp_L_e	0	1000000000
EX_fru_e	0	1000000000
EX_mal_L_e	0	1000000000
EX_succ_e	0	1000000000
EX_din_e	0	1000000000
EX_tsul_e	0	1000000000
EX_gly_e	0	1000000000
EX_dad2_e	0	1000000000
EX_ala_his_L_e	0	1000000000
EX_gly_leu_L_e	0	1000000000
EX_rib_D_e	0	1000000000
EX_etha_e	0	1000000000
EX_ala_asp_L_e	0	1000000000
EX_asp_L_e	0	1000000000
EX_mnl_e	0	1000000000
EX_glyc_e	0	1000000000
EX_orn_e	0	1000000000
EX_sbt_D_e	0	1000000000
EX_ala_gln_L_e	0	1000000000
EX_ile_L_e	0	1000000000
EX_nh4_e	-1000000000	1000000000
EX_ocdca_e	0	1000000000
EX_leu_L_e	0	1000000000
EX_hxan_e	0	1000000000
EX_gal_e	0	1000000000
EX_ser_L_e	0	1000000000
EX_fe2_e	-1000000000	1000000000
EX_cytd_e	0	1000000000
EX_dgsn_e	0	1000000000
EX_cl_e	-1000000000	1000000000
EX_gly_glu_L_e	0	1000000000
EX_mn2_e	-1000000000	1000000000
EX_for_e	0	1000000000
EX_uri_e	0	1000000000
EX_ppi_e	0	1000000000
EX_thymd_e	0	1000000000
EX_gly_gln_L_e	0	1000000000
EX_gly_asn_L_e	0	1000000000
EX_cd2_e	0	1000000000
EX_lac_L_e	0	1000000000
EX_metox_e	0	1000000000
EX_hdca_e	0	1000000000
EX_alagly_e	0	1000000000
EX_acgam_e	0	1000000000
EX_duri_e	0	1000000000
EX_cbl1_e	0	1000000000
EX_thm_e	0	1000000000
EX_no3_e	0	1000000000
EX_gly_met_L_e	0	1000000000
EX_ura_e	0	1000000000
EX_arg_L_e	0	1000000000
EX_cu2_e	-1000000000	1000000000
EX_adn_e	0	1000000000
EX_cobalt2_e	-1000000000	1000000000
EX_tre_e	0	1000000000
EX_man_e	0	1000000000
EX_sucr_e	0	1000
EX_ala_D_e	0	1000000000
EX_malt_e	0	1000000000
EX_gly_phe_L_e	0	1000000000
EX_urea_e	0	1000000000
EX_ptrc_e	0	1000000000
EX_ala_thr_L_e	0	1000000000
EX_ttdca_e	0	1000000000
EX_met_D_e	0	1000000000
EX_gly_pro_L_e	0	1000000000
EX_no2_e	0	1000000000
EX_lac_D_e	0	1000000000
EX_dcyt_e	0	1000000000
EX_fe3_e	-1000000000	1000000000
EX_h2o_e	-1000000000	1000000000
EX_co2_e	-1000000000	1000000000
EX_o2_e	-1000000000	1000000000
EX_atp_e	0	1000000000
EX_nad_e	0	1000000000
EX_nadp_e	0	1000000000
EX_coa_e	0	1000000000
EX_pydx5p_e	0	1000000000
EX_amet_e	0	1000000000
EX_gtp_e	0	1000000000
EX_ctp_e	0	1000000000
EX_gln_L_e	0	1000000000
EX_thmpp_e	0	1000000000
EX_utp_e	0	1000000000
EX_cys_L_e	0	1000000000
EX_thf_e	0	1000000000
EX_datp_e	0	1000000000
EX_asn_L_e	0	1000000000
EX_thr_L_e	0	1000000000
EX_adocbl_e	0	1000000000
EX_10fthf_e	0	1000000000
EX_ribflv_e	0	1000000000
EX_5mthf_e	0	1000000000
EX_udcpdp_e	0	1000000000
EX_acp_e	0	1000000000
EX_2dmmq8_e	0	1000000000
EX_mqn8_e	0	1000000000
EX_pe180_e	0	1000000000
EX_pg180_e	0	1000000000
EX_q8_e	0	1000000000
EX_peptidoglycan_n_e	0	1000000000
EX_cpd15695_e	0	1000000000
EX_cpd15696_e	0	1000000000
EX_cpd15722_e	0	1000000000
EX_cpd15723_e	0	1000000000
EX_cpd15793_e	0	1000000000
EX_cpd15794_e	0	1000000000
EX_cpd15795_e	0	1000000000
EX_peptidoglycan_n-1_e	0	1000000000
EX_cbi_e	0	1000000000
EX_apoACP_e	0	1000000000
EX_adp_e	0	1000000000
EX_fol_e	0	1000000000
EX_galctn_D_e	0	1000000000
EX_cit_e	0	1000000000
EX_ala_L_e	0	1000000000
EX_trp_L_e	0	1000000000
EX_acac_e	0	1000000000
EX_phe_L_e	0	1000000000
EX_tyr_L_e	0	1000000000
EX_ca2_e	-1000000000	1000000000
EX_colipa_e	0	1000000000
EX_pheme_e	0	1000000000
EX_gthrd_e	0	1000000000
EX_sheme_e	0	1000000000
EX_cellb_e	0	1000000000
EX_g6p_e	0	1000000000
EX_acon_C_e	0	1000000000
EX_glcn_e	0	1000000000
EX_bhb_e	0	1000000000
EX_urcan_e	0	1000000000
EX_g1p_e	0	1000000000
EX_cyclodextrin_e	0	1000000000
EX_arab_L_e	0	1000000000
EX_allul_e	0	1000000000
Ex_vio_e	0	1000000000
Ex_dvio_e	0	1000000000
Ex_prodvio_e	0	1000000000
Ex_abt__D_e	0	1000000000
EX_gam_e	0	1000000000
EX_tur_e	0	1000000000
EX_glycogen_e	0	1000000000
EX_dextrin_e	0	1000000000

## Sheet: Subsystems
		Subsystems	No of rxns		Subsystems with less than 10 reactions	No of rxns																																			107	Polyhydroxybutyrate_metabolism
	1	Extracellular Transport	219	32	Alanine, Aspartate and Glutamine metabolism/Nitrogen metabolism	5																																			108	Tocopherol_Biosynthesis
		Others (<10 reactions)	173	33	Aminosugars metabolism	8																																			109	Phenylalanine_and_Tyrosine_Branches_from_Chorismate
	2	Glycerolipid and Glycerophospholipid metabolism	143	34	Ascorbate and Aldarate metabolism	1																																			110	Methionine_Salvage
	3	Transport	127	35	Beta alanine metabolism	1																																			111	L-rhamnose_utilization
	4	Fatty acid biosynthesis	101	36	Biosynthesis of steroids	3																																			112	KDO2-Lipid_A_biosynthesis
	5	Purine metabolism	56	37	Biotin metabolism	2																																			113	Xanthosine_utilization_(xap_region)
	6	Pyrimidine metabolism	56	38	Butanoate metabolism	7																																			114	Putrescine_utilization_pathways
	7	Porphyrin and chlorophyll metabolism	48	39	Carbon fixation in photosynthetic organisms	1																																			115	Archaeal_lipids
	8	Fatty acid metabolism	30	40	Cysteine and Methionine metabolism	5																																			116	Common_Pathway_For_Synthesis_of_Aromatic_Compounds_(DAHP_synthase_to_chorismate)
	9	Lipopolysaccharide biosynthesis	29	41	D-Alanine metabolism	2																																			117	Menaquinone_and_Phylloquinone_Biosynthesis
	10	Folate biosynthesis	25	42	De Novo Pyrimidine Synthesis	2																																			118	Redox-dependent_regulation_of_nucleus_processes
	11	Glycolysis/Gluconeogenesis	22	43	D-Glutamine and D-glutamate metabolism	5																																			119	Chorismate_Synthesis
	12	Phenylalanine, Tyrosine and Tryptophan biosynthesis	22	44	DNA Replication	1																																			120	D-gluconate_and_ketogluconates_metabolism
	13	Glycine, Serine and Threonine metabolism	20	45	Flavohaemoglobin	2																																			121	Pterin_biosynthesis
	14	Nicotinate and nicotinamide metabolism	20	46	Fructose and Mannose metabolism	6																																			122	Murein_hydrolase_regulation_and_cell_death
	15	TCA Cycle	20	47	Glutamate metabolism	8																																			123	Isoleucine_degradation
	16	Pentose Phosphate Pathway	17	48	Glutathione metabolism	7																																			124	Anaerobic_benzoate_metabolism
	17	Recycling of Peptidoglycan Amino Acids	17	49	Glyoxylate and dicarboxylate metabolism	9																																			125	Proteorhodopsin
	18	Demand	17	50	Inorganic Sulfur Assimilation/Cysteine Biosynthesis	2																																			126	Cell_envelope-associated_LytR-CpsA-Psr_transcriptional_attenuators
	19	Oxidative phosphorylation	16	51	Isoprenoid Biosynthesis	5																																			127	Acetoin,_butanediol_metabolism
	20	Riboflavin metabolism	15	52	Lysine Biosynthesis	7																																			128	Siderophore_enterobactin_biosynthesis_and_ferric_enterbactin_transport
	21	Valine, Leucine and Isoleucine Biosynthesis	15	53	Lysine degradation	3																																			129	Biotin_biosynthesis
	22	Histidine metabolism	14	54	Methionine metabolism	8																																			130	Sphingolipid_biosynthesis
	23	Pyruvate metabolism	14	55	Nitrate and nitrite ammonification	2																																			131	Central_meta-cleavage_pathway_of_aromatic_compound_degradation
	24	Arginine and proline metabolism	13	56	Nitrogen metabolism	6																																			132	Protocatechuate_branch_of_beta-ketoadipate_pathway
	25	Urea cycle and metabolism of amino groups	13	57	One carbon pool by folate	4																																			133	Tryptophan_synthesis
	26	Ubiquinone biosynthesis	12	58	Pentose and Glucuronate Interconversions	4																																			134	Glutathione-regulated_potassium-efflux_system_and_associated_functions
	27	Valine, Leucine and Isoleucine degradation	12	59	Peptidoglycan biosynthesis	4																																			135	Cobalamin_synthesis
	28	Pantothenate and CoA biosynthesis	11	60	Protein Translation	1																																			136	Lipopolysaccharide-related_cluster_in_Alphaproteobacteria
	29	Terpenoid biosynthesis	11	61	Pterin metabolism	2																																			137	Hydroxyaromatic_decarboxylase_family
	30	Cyanoamino acid Metabolism	10	62	Pyruvate Alanine Serine Interconversions	1																																			138	Coenzyme_B12_biosynthesis
	31	Propanoate metabolism	10	63	Reductive carboxylate cycle (CO2 fixation)	2																																			139	LOS_core_oligosaccharide_biosynthesis
			1328	64	RNA transcription	1																																			140	Taurine_Utilization
				65	Starch and sucrose metabolism	9																																			141	polyprenyl_synthesis
				66	Streptomycin biosynthesis	4																																			142	Nonmevalonate_Branch_of_Isoprenoid_Biosynthesis
				67	Sulfur metabolism	4																																			143	Flavohaemoglobin
				68	Thiamine metabolism	7																																			144	Threonine_anaerobic_catabolism_gene_cluster
				69	Tryptophan metabolism	3																																			145	High_affinity_phosphate_transporter_and_control_of_PHO_regulon
				70	Tyrosine Metabolism	4																																			146	Transport_of_Zinc
				71	Violacein Biosynthesis/Staurosporine Biosynthesis	8																																			147	D-ribose_utilization
				72	Vitamin B6 metabolism	7																																			148	ABC_transporter_branched-chain_amino_acid_(TC_3.A.1.4.1)
																																									149	Fructooligosaccharides(FOS)_and_Raffinose_Utilization
																																									150	ECF_class_transporters
						173																																			151	Choline_and_Betaine_Uptake_and_Betaine_Biosynthesis
																																									152	Staphylococcal_pathogenicity_islands_SaPI
																																									153	Potassium_homeostasis
																																									154	Ribonucleotide_reduction
																																									155	Fatty_acid_degradation_regulons
																																									156	Thioredoxin-disulfide_reductase
																																									157	ZZ_gjo_need_homes
																																									158	Cobalt-zinc-cadmium_resistance
																																									159	mycolic_acid_synthesis
																																									160	Fatty_Acid_Biosynthesis_FASII
																																									161	Ammonia_assimilation
																																									162	Arsenic_resistance
																																									163	ABC_transporter_dipeptide_(TC_3.A.1.5.2)
																																									164	Transport_of_Iron
																																									165	D-Tagatose_and_Galactitol_Utilization
																																									166	Osmoregulation
																																									167	Lactate_utilization
																																									168	Maltose_and_Maltodextrin_Utilization
																																									169	Mannose_Metabolism
																																									170	Campylobacter_Iron_Metabolism
																																									171	Mannitol_Utilization
																																									172	Transport_of_Manganese
																																									173	Amidase_clustered_with_urea_and_nitrile_hydratase_functions
																																									174	Peptide_methionine_sulfoxide_reductase
																																									175	Glu-tRNA(Gln)_transamidation
																																									176	Triacylglycerol_metabolism
																																									177	Respiratory_Complex_I
																																									178	Glycine_reductase,_sarcosine_reductase_and_betaine_reductase
																																									179	F0F1-type_ATP_synthase
																																									180	Lysine_degradation
																																									181	P-type_ATPase_transporter_potassium_(TC_3.A.3.7.1)
																																									182	D-Sorbitol(D-Glucitol)_and_L-Sorbose_Utilization
																																									183	CO2_uptake,_carboxysome
																																									184	Ribosome_LSU_bacterial
																																									185	DNA-replication
																																									186	mnm5U34_biosynthesis_bacteria
																																									187	Methionine_Degradation
																																									188	Zinc_regulated_enzymes
																																									189	Terminal_cytochrome_C_oxidases_copy
																																									190	Heme_and_Siroheme_Biosynthesis
																																									191	NAD_regulation
																																									192	Fermentations:_Mixed_acid
																																									193	Cinnamic_Acid_Degradation
																																									194	Arginine_Biosynthesis
																																									195	Poly-gamma-glutamate_biosynthesis
																																									196	Lactose_and_Galactose_Uptake_and_Utilization
																																									197	Glycolysis_and_Gluconeogenesis
																																									198	Glyoxylate_Synthesis
																																									199	Phenylalanine_synthesis
																																									200	Propionate-CoA_to_Succinate_Module
																																									201	Methanopterin_biosynthesis2
																																									202	Heat_shock_dnaK_gene_cluster_extended
																																									203	Macromolecular_synthesis_operon
																																									204	Serine_Biosynthesis
																																									205	Glycine_Biosynthesis
																																									206	Acetone_Butanol_Ethanol_Synthesis
																																									207	Formaldehyde_assimilation:_Ribulose_monophosphate_pathway
																																									208	Glutaredoxins
																																									209	Respiratory_dehydrogenases_1
																																									210	Rhamnose_containing_glycans
																																									211	Protein_degradation
																																									212	Folate_Biosynthesis_(Phoenix_Copy)
																																									213	5-FCL-like_protein
																																									214	Carbon_monoxide_induced_hydrogenase
																																									215	Chorismate:_Intermediate_for_synthesis_of_PAPA_antibiotics,_PABA,_anthranilate,_3-hydroxyanthranilate_and_more.
																																									216	Nudix_proteins_(nucleoside_triphosphate_hydrolases)
																																									217	tRNA_modification_Bacteria
																																									218	Leucine_Biosynthesis
																																									219	Sialic_Acid_Metabolism
																																									220	Peptidoglycan_Biosynthesis_2
																																									221	Branched_chain_amino_acid_degradation_regulons
																																									222	Serine-glyoxylate_cycle
																																									223	A_Hypothetical_Protein_Related_to_Proline_Metabolism
																																									224	2-phosphoglycolate_salvage
																																									225	Pterin_carbinolamine_dehydratase
																																									226	Menaquinone_Biosynthesis_via_Futalosine
																																									227	D-galactarate,_D-glucarate_and_D-glycerate_catabolism
																																									228	Streptococcus_agalactiae_virulome
																																									229	Tryptophan_catabolism
																																									230	Acetyl-CoA_fermentation_to_Butyrate
																																									231	Butanol_Biosynthesis
																																									232	Allantoin_degradation
																																									233	Sugar_utilization_in_Thermotogales
																																									234	Carotenoids
																																									235	Benzoate_transport_and_degradation_cluster
																																									236	Adenosyl_nucleosidases
																																									237	PnuC-like_transporters
																																									238	Glutathione:_Non-redox_reactions
																																									239	Lipoic_acid_metabolism
																																									240	Methicillin_resistance_in_Staphylococci
																																									241	Hydantoin_metabolism
																																									242	Dissimilatory_nitrite_reductase
																																									243	Pyruvate_metabolism_II:_acetyl-CoA,_acetogenesis_from_pyruvate
																																									244	Transport_of_Nickel_and_Cobalt
																																									245	4-Hydroxyphenylacetic_acid_catabolic_pathway
																																									246	Vibrio_Core_Oligosaccharide_Biosynthesis
																																									247	Alkanesulfonate_assimilation
																																									248	Polyprenyl_Diphosphate_Biosynthesis
																																									249	Capsular_heptose_biosynthesis
																																									250	Bacterial_hemoglobins
																																									251	Unsaturated_Fatty_Acid_Metabolism
																																									252	Isoprenoid_Biosynthesis
																																									253	Copper_homeostasis
																																									254	Glycerol_fermenation_to_1,3-propanediol
																																									255	Galactose-inducible_PTS
																																									256	Urea_decomposition
																																									257	Biogenesis_of_cytochrome_c_oxidases
																																									258	Glycine_cleavage_system
																																									259	Periplasmic_disulfide_interchange
																																									260	Na+_translocating_decarboxylases_and_related_biotin-dependent_enzymes
																																									261	tRNA_aminoacylation
																																									262	Bacterial_cyanide_production_and_tolerance_mechanisms
																																									263	trimethylamine_N-oxide_(TMAO)_reductase
																																									264	Type_IV_pilus
																																									265	Nitrosative_stress
																																									266	(GlcNAc)2_Catabolic_Operon
																																									267	Ketoisovalerate_oxidoreductase
																																									268	Lacto-N-Biose_I_and_Galacto-N-Biose_Metabolic_Pathway
																																									269	Entner-Doudoroff_Pathway
																																									270	tRNA_modification_Archaea_Henri
																																									271	Glycolate,_glyoxylate_interconversions
																																									272	Glutathione:_gamma-glutamyl_cycle
																																									273	O-Methyl_Phosphoramidate_Capsule_Modification_in_Campylobacter
																																									274	Homogentisate_pathway_of_aromatic_compound_degradation
																																									275	N-Acetyl-Galactosamine_and_Galactosamine_Utilization
																																									276	Dihydroxyacetone_kinases
																																									277	Perosamine_Synthesis_Vibrio
																																									278	rRNA_modification_Bacteria
																																									279	Valine_degradation
																																									280	Nucleoside_triphosphate_pyrophosphohydrolase_MazG
																																									281	linker_unit-arabinogalactan_synthesis
																																									282	Quinate_degradation
																																									283	Pterin_metabolism_3
																																									284	Glutamine_synthetases
																																									285	Carbonate_Biomineralization
																																									286	Iron_acquisition_in_Vibrio
																																									287	Fructose_and_Mannose_Inducible_PTS
																																									288	Teichuronic_acid_biosynthesis
																																									289	Denitrification
																																									290	tRNA_modification_yeast_mitochondrial
																																									291	Carboxysome
																																									292	Biphenyl_Degradation
																																									293	Acetyl-CoA_pathway_of_CO2_fixation
																																									294	Legionaminic_Acid_Biosynthesis
																																									295	Glutathione_synthesis
																																									296	n-Phenylalkanoic_acid_degradation
																																									297	Wyeosine-MimG_Biosynthesis
																																									298	Sucrose-specific_PTS
																																									299	mcm5s2U_biosynthesis_in_tRNA
																																									300	C_jejuni_colonization_of_chick_caeca
																																									301	Queuosine-Archaeosine_Biosynthesis
																																									302	Plastoquinone_Biosynthesis
																																									303	Allantoin_Utilization
																																									304	Fe-S_cluster_assembly
																																									305	tRNA_modification_yeast_cytoplasmic
																																									306	tRNA_modification_Archaea

## Sheet: metabolites
			Metabolite name			SEED Met ID	Metabolite description	Metabolite neutral formula	Metabolite charged formula		Metabolite Compartment	Metabolite KEGGID	Metabolite PubChemID	Metabolite CheBI ID	Metabolite Inchi String	Metabolite Smile	Notes
cpd00113_c0	ipdp_c	ipdp_c	ipdp_c	ipdp	1	cpd00113_c0	Isopentenyl diphosphate		C5H10O7P2	-2	cytosol	C00129					According to Big ID database, OK
cpd02590_c0	hepdp_c	hepdp_c	hepdp_c	hepdp	2	cpd02590_c0	All-trans-Heptaprenyl diphosphate		C35H58O7P2	-2	cytosol	C04216					According to Big ID database, OK
cpd02557_c0	octdp_c	octdp_c	octdp_c	octdp	3	cpd02557_c0	All-trans-Octaprenyl diphosphate		C40H66O7P2	-2	cytosol	C04146					According to Big ID database, OK
cpd00012_c0	ppi_c	ppi_c	ppi_c	ppi	4	cpd00012_c0	Diphosphate		H2O7P2	-2	cytosol	C00013					According to Big ID database, OK
cpd00161_c0	thr__L_c	thr__L_c	thr__L_c	thr-L	5	cpd00161_c0	L-Threonine		C4H9NO3	0	cytosol	C00188,D00041					According to Big ID database, OK
cpd00071_c0	acald_c	acald_c	acald_c	acald	6	cpd00071_c0	Acetaldehyde		C2H4O	0	cytosol	C00084					According to Big ID database, OK
cpd00033_c0	gly_c	gly_c	gly_c	gly	7	cpd00033_c0	Glycine		C2H5NO2	0	cytosol	C00037,D00011					According to Big ID database, OK
cpd00067_c0	h_c	h_c	h_c	h	8	cpd00067_c0	H+		H	1	cytosol	C00080					According to Big ID database, OK
cpd00002_c0	atp_c	atp_c	atp_c	atp	9	cpd00002_c0	ATP		C10H13N5O13P3	-3	cytosol	C00002,D08646					According to Big ID database, OK
cpd00196_c0	actp_c	actp_c	actp_c	actp	10	cpd00196_c0	Acetyl phosphate		C2H4O5P	-1	cytosol	C00227					According to Big ID database, OK
cpd00029_c0	ac_c	ac_c	ac_c	ac	11	cpd00029_c0	Acetate		C2H3O2	-1	cytosol	C00033,D00010					According to Big ID database, OK
cpd00008_c0	adp_c	adp_c	adp_c	adp	12	cpd00008_c0	ADP		C10H13N5O10P2	-2	cytosol	C00008,G11113					According to Big ID database, OK
cpd00091_c0	ump_c	ump_c	ump_c	ump	13	cpd00091_c0	UMP		C9H12N2O9P	-1	cytosol	C00105					According to Big ID database, OK
cpd00249_c0	uri_c	uri_c	uri_c	uri	14	cpd00249_c0	Uridine		C9H12N2O6	0	cytosol	C00299,C16745					According to Big ID database, OK
cpd00533_c0	dcdp_c	dcdp_c	dcdp_c	dcdp	15	cpd00533_c0	DCDP		C9H13N3O10P2	-2	cytosol	C00705					According to Big ID database, OK
cpd00356_c0	dctp_c	dctp_c	dctp_c	dctp	16	cpd00356_c0	dCTP		C9H13N3O13P3	-3	cytosol	C00458					According to Big ID database, OK
cpd15672_c0	cpd15672_c	cpd15672_c	cpd15672_c	cpd15672	17	cpd15672_c0	1-anteisoheptadecanoyl-sn-glycerol 3-phosphate		C20H40O7P	-1	cytosol	None					No Big ID, No KeggID, Using SEED model metabolite description
cpd11434_c0	fa12coa_c	fa12coa_c	fa12coa_c	fa12coa	18	cpd11434_c0	fa12coa		C38H65N7O17P3S	-3	cytosol	None					According to Big ID database
cpd15678_c0	cpd15678_c	cpd15678_c	cpd15678_c	cpd15678	19	cpd15678_c0	1,2-dianteisoheptadecanoyl-sn-glycerol 3-phosphate		C37H72O8P	-1	cytosol	None					No Big ID, No KeggID, Using SEED model metabolite description
cpd00010_c0	coa_c	coa_c	coa_c	coa	20	cpd00010_c0	Coenzyme A		C21H33N7O16P3S	-3	cytosol	C00010					According to Big ID database, OK
cpd00011_c0	co2_c	co2_c	co2_c	co2	21	cpd00011_c0	CO2		CO2	0	cytosol	C00011,D00004					According to Big ID database, OK
cpd02152_c0	argsuc_c	argsuc_c	argsuc_c	argsuc	22	cpd02152_c0	N(omega)-(L-Arginino)succinate		C10H17N4O6	-1	cytosol	C03406					According to Big ID database, OK
cpd00106_c0	fum_c	fum_c	fum_c	fum	23	cpd00106_c0	Fumarate		C4H2O4	-2	cytosol	C00122,D02308					According to Big ID database, OK
cpd00051_c0	arg__L_c	arg__L_c	arg__L_c	arg-L	24	cpd00051_c0	L-Arginine		C6H15N4O2	1	cytosol	C00062,D02982					According to Big ID database, OK
cpd03671_c0	gam1p_c	gam1p_c	gam1p_c	gam1p	25	cpd03671_c0	D-Glucosamine 1-phosphate		C6H14NO8P	0	cytosol	C03783,C06156					According to Big ID database, OK
cpd02611_c0	acgam1p_c	acgam1p_c	acgam1p_c	acgam1p	26	cpd02611_c0	N-Acetyl-D-glucosamine 1-phosphate		C8H15NO9P	-1	cytosol	C04256,C04501					According to Big ID database, OK
cpd00022_c0	accoa_c	accoa_c	accoa_c	accoa	27	cpd00022_c0	Acetyl-CoA		C23H35N7O17P3S	-3	cytosol	C00024					According to Big ID database, OK
cpd00001_c0	h2o_c	h2o_c	h2o_c	h2o	28	cpd00001_c0	H2O		H2O	0	cytosol	C00001,C01328,D00001,D03703,D06322					According to Big ID database, OK
cpd11420_c0	trdox_c	trdox_c	trdox_c	trdox	29	cpd11420_c0	Oxidized thioredoxin		C6H7NO2R2S2	0	cytosol	C00343					According to Big ID database, OK
cpd00790_c0	achms_c	achms_c	achms_c	achms	30	cpd00790_c0	O Acetyl L homoserine C6H11NO4		C6H11NO4	0	cytosol	C01077					According to Big ID database, OK
cpd00135_c0	hcys__L_c	hcys__L_c	hcys__L_c	hcys-L	31	cpd00135_c0	L-Homocysteine		C4H9NO2S	0	cytosol	C00155					According to Big ID database, OK
cpd00081_c0	so3_c	so3_c	so3_c	so3	32	cpd00081_c0	Sulfite		HO3S	-1	cytosol	C00094,C11481					According to Big ID database, OK
cpd00268_c0	tsul_c	tsul_c	tsul_c	tsul	33	cpd00268_c0	Thiosulfate		O3S2	-2	cytosol	C00320,C05529					According to Big ID database, OK
cpd11421_c0	trdrd_c	trdrd_c	trdrd_c	trdrd	34	cpd11421_c0	Reduced thioredoxin		C6H9NO2R2S2	0	cytosol	C00342					According to Big ID database, OK
cpd00650_c0	b2coa_c	b2coa_c	b2coa_c	b2coa	35	cpd00650_c0	Crotonoyl-CoA		C25H37N7O17P3S	-3	cytosol	C00877					According to Big ID database, OK
cpd00004_c0	nadh_c	nadh_c	nadh_c	nadh	36	cpd00004_c0	Nicotinamide adenine dinucleotide - reduced		C21H27N7O14P2	-2	cytosol	C00004					According to Big ID database, OK
cpd00003_c0	nad_c	nad_c	nad_c	nad	37	cpd00003_c0	Nicotinamide adenine dinucleotide		C21H26N7O14P2	-1	cytosol	C00003,D00002					According to Big ID database, OK
cpd00120_c0	btcoa_c	btcoa_c	btcoa_c	btcoa	38	cpd00120_c0	Butanoyl-CoA		C25H39N7O17P3S	-3	cytosol	C00136					According to Big ID database, OK
cpd00357_c0	dttp_c	dttp_c	dttp_c	dttp	39	cpd00357_c0	dTTP		C10H14N2O14P3	-3	cytosol	C00459					According to Big ID database, OK
cpd00626_c0	dtdpglu_c	dtdpglu_c	dtdpglu_c	dtdpglu	40	cpd00626_c0	DTDPglucose		C16H24N2O16P2	-2	cytosol	C00842					According to Big ID database, OK
cpd00089_c0	g1p_c	g1p_c	g1p_c	g1p	41	cpd00089_c0	D-Glucose 1-phosphate		C6H12O9P	-1	cytosol	C00103					According to Big ID database, OK
cpd00060_c0	met__L_c	met__L_c	met__L_c	met-L	42	cpd00060_c0	L-Methionine		C5H11NO2S	0	cytosol	C00073,D00019,D04984					According to Big ID database, OK
cpd00035_c0	ala__L_c	ala__L_c	ala__L_c	ala-L	43	cpd00035_c0	L-Alanine		C3H7NO2	0	cytosol	C00041,D00012					According to Big ID database, OK
cpd11590_c0	met_L_ala__L_c	met_L_ala__L_c	met_L_ala__L_c	met_L_ala-L	44	cpd11590_c0	met-L-ala-L		C8H15N2O3S	-1	cytosol	None					According to Big ID database
cpd11582_c0	ala_L_thr__L_c	ala_L_thr__L_c	ala_L_thr__L_c	ala_L_thr-L	45	cpd11582_c0	ala-L-Thr-L		C7H14N2O4	0	cytosol	None					According to Big ID database
cpd00009_c0	pi_c	pi_c	pi_c	pi	46	cpd00009_c0	Phosphate		HO4P	-2	cytosol	C00009,D05467					According to Big ID database, OK
cpd11590_e0	met_L_ala__L_e	met_L_ala__L_e	met_L_ala__L_e	met_L_ala-L	47	cpd11590_e0	met-L-ala-L		C8H15N2O3S	-1	extracellular	None					According to Big ID database
cpd03525_c0	sucglu_c	sucglu_c	sucglu_c	sucglu	48	cpd03525_c0	N2-Succinyl-L-glutamate		C9H10NO7	-3	cytosol	C05931					According to Big ID database, OK
cpd03526_c0	sucgsa_c	sucgsa_c	sucgsa_c	sucgsa	49	cpd03526_c0	N2-Succinyl-L-glutamate 5-semialdehyde		C9H11NO6	-2	cytosol	C05932					According to Big ID database, OK
cpd00080_c0	glyc3p_c	glyc3p_c	glyc3p_c	glyc3p	50	cpd00080_c0	Glycerol 3-phosphate		C3H8O6P	-1	cytosol	C00093					According to Big ID database, OK
cpd11493_c0	ACP_c	ACP_c	ACP_c	ACP	51	cpd11493_c0	Acyl carrier protein		C11H21N2O7PRS	-1	cytosol	C00145,C00229,C00812,C01336,C04298,C11482,C16736					According to Big ID database, OK
cpd11484_c0	3hmrsACP_c	3hmrsACP_c	3hmrsACP_c	3hmrsACP	52	cpd11484_c0	(R)-3-Hydroxytetradecanoyl-acyl-carrier protein		C25H47N2O9PRS	-1	cytosol	C04688					According to Big ID database, OK
cpd00037_c0	uacgam_c	uacgam_c	uacgam_c	uacgam	53	cpd00037_c0	UDP-N-acetyl-D-glucosamine		C17H25N3O17P2	-2	cytosol	C00043,G10610					According to Big ID database, OK
cpd02886_c0	u3aga_c	u3aga_c	u3aga_c	u3aga	54	cpd02886_c0	UDP-3-O-(3-hydroxytetradecanoyl)-N-acetylglucosamine		C31H51N3O19P2	-2	cytosol	C04738					According to Big ID database, OK
cpd00006_c0	nadp_c	nadp_c	nadp_c	nadp	55	cpd00006_c0	Nicotinamide adenine dinucleotide phosphate		C21H26N7O17P3	-2	cytosol	C00006					According to Big ID database, OK
cpd03187_c0	mDB_oxasucc_c	mDB_oxasucc_c	oxasucc_c	oxasucc	56	cpd03187_c0	Oxalosuccinate		C6H3O7	-3	cytosol	None					Manual, no BIGGID
cpd00260_c0	icit_c	icit_c	icit_c	icit	57	cpd00260_c0	Isocitrate		C6H5O7	-3	cytosol	C00311					According to Big ID database, OK
cpd00005_c0	nadph_c	nadph_c	nadph_c	nadph	58	cpd00005_c0	Nicotinamide adenine dinucleotide phosphate - reduced		C21H27N7O17P3	-3	cytosol	C00005					According to Big ID database, OK
cpd00156_c0	val__L_c	val__L_c	val__L_c	val-L	59	cpd00156_c0	L-Valine		C5H11NO2	0	cytosol	C00183,D00039					According to Big ID database, OK
cpd00156_e0	val__L_e	val__L_e	val__L_e	val-L	60	cpd00156_e0	L-Valine		C5H11NO2	0	extracellular	C00183,D00039					According to Big ID database, OK
cpd11583_c0	ala_L_leu__L_c	ala_L_leu__L_c	ala_L_leu__L_c	ala_L_leu-L	61	cpd11583_c0	Ala-Leu		C9H18N2O3	0	cytosol	None					According to Big ID database
cpd11583_e0	ala_L_leu__L_e	ala_L_leu__L_e	ala_L_leu__L_e	ala_L_leu-L	62	cpd11583_e0	Ala-Leu		C9H18N2O3	0	extracellular	None					According to Big ID database
cpd02597_c0	2mcacn_c	2mcacn_c	2mcacn_c	2mcacn	63	cpd02597_c0	Cis-2-Methylaconitate		C7H5O6	-3	cytosol	C04225					According to Big ID database, OK
cpd02799_c0	micit_c	micit_c	micit_c	micit	64	cpd02799_c0	Methylisocitrate		C7H7O7	-3	cytosol	C04593					According to Big ID database, OK
cpd01242_c0	drib_c	drib_c	drib_c	drib	65	cpd01242_c0	Deoxyribose C5H10O4		C5H10O4	0	cytosol	C02783					According to Big ID database, OK
cpd01242_e0	drib_e	drib_e	drib_e	drib	66	cpd01242_e0	Deoxyribose C5H10O4		C5H10O4	0	extracellular	C02783					According to Big ID database, OK
cpd11473_c0	thex2eACP_c	thex2eACP_c	thex2eACP_c	thex2eACP	67	cpd11473_c0	Trans-Hex-2-enoyl-acyl-carrier protein		C17H29N2O8PRS	-1	cytosol	C05748					According to Big ID database, OK
cpd11479_c0	3hhexACP_c	3hhexACP_c	3hhexACP_c	3hhexACP	68	cpd11479_c0	(R)-3-Hydroxyhexanoyl-acyl-carrier protein		C17H31N2O9PRS	-1	cytosol	C05747					According to Big ID database, OK
cpd08301_c0	2mecdp_c	2mecdp_c	2mecdp_c	2mecdp	69	cpd08301_c0	2-C-methyl-D-erythritol 2,4-cyclodiphosphate		C5H10O9P2	-2	cytosol	C11453					According to Big ID database, OK
cpd08288_c0	2p4c2me_c	2p4c2me_c	2p4c2me_c	2p4c2me	70	cpd08288_c0	2-phospho-4-(cytidine 5-diphospho)-2-C-methyl-D-erythritol		C14H23N3O17P3	-3	cytosol	C11436					According to Big ID database, OK
cpd00046_c0	cmp_c	cmp_c	cmp_c	cmp	71	cpd00046_c0	CMP		C9H13N3O8P	-1	cytosol	C00055,G10621					According to Big ID database, OK
cpd03761_c0	pre6a_c	pre6a_c	pre6a_c	pre6a	72	cpd03761_c0	Precorrin 6A		C44H47N4O16	-7	cytosol	C06320					According to Big ID database, OK
cpd03760_c0	pre6b_c	pre6b_c	pre6b_c	pre6b	73	cpd03760_c0	Precorrin 6B		C44H49N4O16	-7	cytosol	C06319					According to Big ID database, OK
cpd00254_e0	mg2_e	mg2_e	mg2_e	mg2	74	cpd00254_e0	Magnesium		Mg	2	extracellular	C00305					According to Big ID database, OK
cpd00254_c0	mg2_c	mg2_c	mg2_c	mg2	75	cpd00254_c0	Magnesium		Mg	2	cytosol	C00305					According to Big ID database, OK
cpd00036_c0	succ_c	succ_c	succ_c	succ	76	cpd00036_c0	Succinate		C4H4O4	-2	cytosol	C00042					According to Big ID database, OK
cpd15500_c0	mqn8_c	mqn8_c	mqn8_c	mqn8	77	cpd15500_c0	Menaquinone 8		C51H72O2	0	cytosol	None					According to Big ID database		mqn8_c
cpd15499_c0	mql8_c	mql8_c	mql8_c	mql8	78	cpd15499_c0	Menaquinol 8		C51H74O2	0	cytosol	None					According to Big ID database		mql8_c
cpd15603_c0	gly_cys__L_c	gly_cys__L_c	gly_cys__L_c	glyys-L	79	cpd15603_c0	Gly-Cys		C5H10N2O3S	0	cytosol	None					According to Big ID database
cpd15603_e0	gly_cys__L_e	gly_cys__L_e	gly_cys__L_e	glyys-L	80	cpd15603_e0	Gly-Cys		C5H10N2O3S	0	extracellular	None					According to Big ID database
cpd00367_c0	cytd_c	cytd_c	cytd_c	cytd	81	cpd00367_c0	Cytidine		C9H13N3O5	0	cytosol	C00475,C02961,D00168,D07769					According to Big ID database, OK
cpd00038_c0	gtp_c	gtp_c	gtp_c	gtp	82	cpd00038_c0	GTP		C10H13N5O14P3	-3	cytosol	C00044					According to Big ID database, OK
cpd00031_c0	gdp_c	gdp_c	gdp_c	gdp	83	cpd00031_c0	GDP		C10H13N5O11P2	-2	cytosol	C00035,G10620					According to Big ID database, OK
cpd02857_c0	2dda7p_c	2dda7p_c	2dda7p_c	2dda7p	84	cpd02857_c0	2-Dehydro-3-deoxy-D-arabino-heptonate 7-phosphate		C7H11O10P	-2	cytosol	C04691					According to Big ID database, OK
cpd00699_c0	3dhq_c	3dhq_c	3dhq_c	3dhq	85	cpd00699_c0	3-Dehydroquinate		C7H9O6	-1	cytosol	C00944					According to Big ID database, OK
cpd03519_c0	cpd03519_c	cpd03519_c	cpd03519_c	cpd03519	86	cpd03519_c0	2,5-Diaminopyrimidine nucleoside triphosphate		C9H15N5O14P3	-3	cytosol	None					No Big ID, No KeggID, Using SEED model metabolite description
cpd03518_c0	cpd03518_c	cpd03518_c	cpd03518_c	cpd03518	87	cpd03518_c0	Formamidopyrimidine nucleoside triphosphate		C10H15N5O15P3	-3	cytosol	None					No Big ID, No KeggID, Using SEED model metabolite description
cpd00047_c0	for_c	for_c	for_c	for	88	cpd00047_c0	Formate		CHO2	-1	cytosol	C00058					According to Big ID database, OK
cpd00481_c0	ibcoa_c	ibcoa_c	ibcoa_c	ibcoa	89	cpd00481_c0	Isobutyryl-CoA		C25H39N7O17P3S	-3	cytosol	C00630					According to Big ID database, OK
cpd00641_c0	histd_c	histd_c	histd_c	histd	90	cpd00641_c0	L-Histidinol		C6H12N3O	1	cytosol	C00860					According to Big ID database, OK
cpd00807_c0	hisp_c	hisp_c	hisp_c	hisp	91	cpd00807_c0	L-Histidinol phosphate		C6H12N3O4P	0	cytosol	C01100					According to Big ID database, OK
cpd00067_e0	h_e	h_e	h_e	h	92	cpd00067_e0	H+		H	1	extracellular	C00080					According to Big ID database, OK
cpd11576_c0	metox__R_e	metox__R_e	metox__R_e	metox-R	93	cpd11576_c0	L-methionine R-oxide		C5H11NO3S	0	extracellular	None					According to Big ID database
cpd02555_c0	hpglu_c	hpglu_c	hpglu_c	hpglu	94	cpd02555_c0	Tetrahydropteroyltri L glutamate C24H34N8O12		C29H33N9O12	-4	cytosol	C04144					According to Big ID database, OK
cpd02738_c0	mhpglu_c	mhpglu_c	mhpglu_c	mhpglu	95	cpd02738_c0	5 Methyltetrahydropteroyltri L glutamate C25H36N8O12		C30H35N9O12	-4	cytosol	C04489					According to Big ID database, OK
cpd02187_c0	2mp2coa_c	2mp2coa_c	2mp2coa_c	2mp2coa	96	cpd02187_c0	2-Methylprop-2-enoyl-CoA		C25H37N7O17P3S	-3	cytosol	C03460					According to Big ID database, OK
cpd00007_c0	o2_c	o2_c	o2_c	o2	97	cpd00007_c0	O2		O2	0	cytosol	C00007,D00003					According to Big ID database, OK
cpd00130_c0	mal__L_c	mal__L_c	mal__L_c	mal-L	98	cpd00130_c0	L-Malate		C4H4O5	-2	cytosol	C00149					According to Big ID database, OK
cpd00032_c0	oaa_c	oaa_c	oaa_c	oaa	99	cpd00032_c0	Oxaloacetate		C4H2O5	-2	cytosol	C00036,C03981					According to Big ID database, OK
cpd00040_c0	glx_c	glx_c	glx_c	glx	100	cpd00040_c0	Glyoxylate		C2HO3	-1	cytosol	C00048					According to Big ID database, OK
cpd00346_c0	aspsa_c	aspsa_c	aspsa_c	aspsa	101	cpd00346_c0	L-Aspartate 4-semialdehyde		C4H7NO3	0	cytosol	C00441					According to Big ID database, OK
cpd00227_c0	hom__L_c	hom__L_c	hom__L_c	hom-L	102	cpd00227_c0	L-Homoserine		C4H9NO3	0	cytosol	C00263					According to Big ID database, OK
cpd02656_c0	dmlz_c	dmlz_c	dmlz_c	dmlz	103	cpd02656_c0	6,7-Dimethyl-8-(1-D-ribityl)lumazine		C13H18N4O6	0	cytosol	C04332					According to Big ID database, OK
cpd02882_c0	4r5au_c	4r5au_c	4r5au_c	4r5au	104	cpd02882_c0	4-(1-D-Ribitylamino)-5-aminouracil		C9H16N4O6	0	cytosol	C04732					According to Big ID database, OK
cpd00220_c0	ribflv_c	ribflv_c	ribflv_c	ribflv	105	cpd00220_c0	Riboflavin		C17H20N4O6	0	cytosol	C00255,D00050					According to Big ID database, OK
cpd02964_c0	ugmd_c	ugmd_c	ugmd_c	ugmd	106	cpd02964_c0	UDP-N-acetylmuramoyl-L-alanyl-D-gamma-glutamyl-meso-2,6-diaminopimelate		C35H51N7O26P2	-4	cytosol	C04877,C20886					According to Big ID database, OK
cpd00731_c0	alaala_c	alaala_c	alaala_c	alaala	107	cpd00731_c0	D-Alanyl-D-alanine		C6H12N2O3	0	cytosol	C00993					According to Big ID database, OK
cpd02968_c0	ugmda_c	ugmda_c	ugmda_c	ugmda	108	cpd02968_c0	UDP-N-acetylmuramoyl-L-alanyl-D-glutamyl-meso-2,6-diaminopimeloyl-D-alanyl-D-alanine		C41H61N9O28P2	-4	cytosol	C04882					According to Big ID database, OK
cpd00971_c0	na1_c	na1_c	na1_c	na1	109	cpd00971_c0	Sodium		Na	1	cytosol	C01330					According to Big ID database, OK
cpd00971_e0	na1_e	na1_e	na1_e	na1	110	cpd00971_e0	Sodium		Na	1	extracellular	C01330					According to Big ID database, OK
cpd00023_c0	glu__L_c	glu__L_c	glu__L_c	glu-L	111	cpd00023_c0	L-Glutamate		C5H8NO4	-1	cytosol	C00025,D00007					According to Big ID database, OK
cpd00023_e0	glu__L_e	glu__L_e	glu__L_e	glu-L	112	cpd00023_e0	L-Glutamate		C5H8NO4	-1	extracellular	C00025,D00007					According to Big ID database, OK
cpd00241_c0	dgtp_c	dgtp_c	dgtp_c	dgtp	113	cpd00241_c0	dGTP		C10H13N5O13P3	-3	cytosol	C00286					According to Big ID database, OK
cpd00295_c0	dgdp_c	dgdp_c	dgdp_c	dgdp	114	cpd00295_c0	DGDP		C10H13N5O10P2	-2	cytosol	C00361					According to Big ID database, OK
cpd00039_c0	lys__L_c	lys__L_c	lys__L_c	lys-L	115	cpd00039_c0	L-Lysine		C6H15N2O2	1	cytosol	C00047,D02304					According to Big ID database, OK
cpd00039_e0	lys__L_e	lys__L_e	lys__L_e	lys-L	116	cpd00039_e0	L-Lysine		C6H15N2O2	1	extracellular	C00047,D02304					According to Big ID database, OK
cpd01155_e0	15dap_e	15dap_e	15dap_e	15dap	117	cpd01155_e0	1,5-Diaminopentane		C5H16N2	2	extracellular	C01672					According to Big ID database, OK
cpd01155_c0	15dap_c	15dap_c	15dap_c	15dap	118	cpd01155_c0	1,5-Diaminopentane		C5H16N2	2	cytosol	C01672					According to Big ID database, OK
cpd00658_c0	ichor_c	ichor_c	ichor_c	ichor	119	cpd00658_c0	Isochorismate		C10H8O6	-2	cytosol	C00885					According to Big ID database, OK
cpd00216_c0	chor_c	chor_c	chor_c	chor	120	cpd00216_c0	Chorismate		C10H8O6	-2	cytosol	C00251					According to Big ID database, OK
cpd02893_c0	5aizc_c	5aizc_c	5aizc_c	5aizc	121	cpd02893_c0	5-amino-1-(5-phospho-D-ribosyl)imidazole-4-carboxylate		C9H13N3O9P	-1	cytosol	C04751					According to Big ID database, OK
cpd02140_c0	air_c	air_c	air_c	air	122	cpd02140_c0	5-amino-1-(5-phospho-D-ribosyl)imidazole		C8H14N3O7P	0	cytosol	C03373					According to Big ID database, OK
cpd00242_c0	hco3_c	hco3_c	hco3_c	hco3	123	cpd00242_c0	Bicarbonate		CHO3	-1	cytosol	C00288,C01353					According to Big ID database, OK
cpd11589_c0	gly_asp__L_c	gly_asp__L_c	gly_asp__L_c	gly_asp-L	124	cpd11589_c0	gly-asp-L		C6H9N2O5	-1	cytosol	None					According to Big ID database
cpd00041_c0	asp__L_c	asp__L_c	asp__L_c	asp-L	125	cpd00041_c0	L-Aspartate		C4H6NO4	-1	cytosol	C00049,D00013					According to Big ID database, OK
cpd14960_c0	codscl5b_c	codscl5b_c	codscl5b_c	codscl5b	126	cpd14960_c0	Cobalt-precorrin-5b		C43H44CoN4O16	-6	cytosol	C16243					According to Big ID database, OK
cpd08371_c0	copre5_c	copre5_c	copre5_c	copre5	127	cpd08371_c0	Cobalt-precorrin 5		C45H47CoN4O16	-5	cytosol	C11541					According to Big ID database, OK
cpd03917_c0	adcobhex_c	adcobhex_c	adcobhex_c	adcobhex	128	cpd03917_c0	Adenosyl-cobyric acid		C55H77CoN15O11	1	cytosol	C06507					According to Big ID database, OK
cpd03918_c0	adocbi_c	adocbi_c	adocbi_c	adocbi	129	cpd03918_c0	Adenosyl cobinamide		C58H85CoN16O11	2	cytosol	C06508					According to Big ID database, OK
cpd02039_c0	appl_c	appl_c	appl_c	appl	130	cpd02039_c0	1-Aminopropan-2-ol		C3H10NO	1	cytosol	C05771					According to Big ID database, OK
cpd15524_c0	pa160_c	pa160_c	pa160_c	pa160	131	cpd15524_c0	1,2-dihexadecanoyl-sn-glycerol 3-phosphate		C35H68O8P	-1	cytosol	None					According to Big ID database
cpd00123_c0	3mob_c	3mob_c	3mob_c	3mob	132	cpd00123_c0	3-Methyl-2-oxobutanoate		C5H7O3	-1	cytosol	C00141					According to Big ID database, OK
cpd01646_c0	3c3hmp_c	3c3hmp_c	3c3hmp_c	3c3hmp	133	cpd01646_c0	3-Carboxy-3-hydroxy-4-methylpentanoate		C7H10O5	-2	cytosol	C02504					According to Big ID database, OK
cpd00239_c0	h2s_c	h2s_c	h2s_c	h2s	134	cpd00239_c0	Hydrogen sulfide		H2S	0	cytosol	C00283					According to Big ID database, OK
cpd02431_c0	1pyr5c_c	1pyr5c_c	1pyr5c_c	1pyr5c	135	cpd02431_c0	1-Pyrroline-5-carboxylate		C5H6NO2	-1	cytosol	C03912,C04322					According to Big ID database, OK
cpd15723_c0	cpd15723_c	cpd15723_c	cpd15723_c	cpd15723	136	cpd15723_c0	Dianteisoheptadecanoylphosphatidylglycerol		C40H78O10P	-1	cytosol	None					No Big ID, No KeggID, Using SEED model metabolite description
cpd15717_c0	cpd15717_c	cpd15717_c	cpd15717_c	cpd15717	137	cpd15717_c0	Dianteisoheptadecanoylphosphatidylglycerophosphate		C40H78O13P2	-2	cytosol	None					No Big ID, No KeggID, Using SEED model metabolite description
cpd00102_c0	g3p_c	g3p_c	g3p_c	g3p	138	cpd00102_c0	Glyceraldehyde 3-phosphate		C3H6O6P	-1	cytosol	C00118,C00661					According to Big ID database, OK
cpd00020_c0	pyr_c	pyr_c	pyr_c	pyr	139	cpd00020_c0	Pyruvate		C3H3O3	-1	cytosol	C00022					According to Big ID database, OK
cpd08289_c0	dxyl5p_c	dxyl5p_c	dxyl5p_c	dxyl5p	140	cpd08289_c0	1-deoxy-D-xylulose 5-phosphate		C5H10O7P	-1	cytosol	C11437					According to Big ID database, OK
cpd11476_c0	cpd11476_c	cpd11476_c	cpd11476_c	cpd11476	141	cpd11476_c0	hexadecanoyl-acp		C27H51N2O8PRS	-1	cytosol	None					No Big ID, No KeggID, Using SEED model metabolite description
cpd11477_c0	tpalm2eACP_c	tpalm2eACP_c	tpalm2eACP_c	tpalm2eACP	142	cpd11477_c0	Trans-Hexadec-2-enoyl-acyl-carrier protein		C27H49N2O8PRS	-1	cytosol	C05763					According to Big ID database, OK
cpd00054_c0	ser__L_c	ser__L_c	ser__L_c	ser-L	143	cpd00054_c0	L-Serine		C3H7NO3	0	cytosol	C00065,D00016					According to Big ID database, OK
cpd00143_c0	phpyr_c	phpyr_c	phpyr_c	phpyr	144	cpd00143_c0	Phenylpyruvate		C9H7O3	-1	cytosol	C00166,C02763					According to Big ID database, OK
cpd00557_c0	sheme_c	sheme_c	sheme_c	sheme	145	cpd00557_c0	Siroheme		C42H36FeN4O16	-8	cytosol	C00748					According to Big ID database, OK
cpd03426_c0	scl_c	scl_c	scl_c	scl	146	cpd03426_c0	Sirohydrochlorin		C42H38N4O16	-8	cytosol	C05778					According to Big ID database, OK
cpd10515_c0	fe2_c	fe2_c	fe2_c	fe2	147	cpd10515_c0	Fe2+		Fe	2	cytosol	C14818					According to Big ID database, OK
cpd11509_c0	cpd11509_c	cpd11509_c	cpd11509_c	cpd11509	148	cpd11509_c0	10-methyl-3-hydroxy-dodecanoyl-ACP		C24H45N2O9PRS	-1	cytosol	None					No Big ID, No KeggID, Using SEED model metabolite description
cpd11508_c0	cpd11508_c	cpd11508_c	cpd11508_c	cpd11508	149	cpd11508_c0	10-methyl-3-oxo-dodecanoyl-ACP		C24H43N2O9PRS	-1	cytosol	None					No Big ID, No KeggID, Using SEED model metabolite description
cpd00061_c0	pep_c	pep_c	pep_c	pep	150	cpd00061_c0	Phosphoenolpyruvate		C3H3O6P	-2	cytosol	C00074					According to Big ID database, OK
cpd00482_c0	2pg_c	2pg_c	2pg_c	2pg	151	cpd00482_c0	D-Glycerate 2-phosphate		C3H5O7P	-2	cytosol	C00631					According to Big ID database, OK
cpd00152_c0	agm_c	agm_c	agm_c	agm	152	cpd00152_c0	Agmatine		C5H16N4	2	cytosol	C00179					According to Big ID database, OK
cpd00052_c0	ctp_c	ctp_c	ctp_c	ctp	153	cpd00052_c0	CTP		C9H13N3O14P3	-3	cytosol	C00063					According to Big ID database, OK
cpd15683_c0	cpd15683_c	cpd15683_c	cpd15683_c	cpd15683	154	cpd15683_c0	CDP-1,2-diisoheptadecanoylglycerol		C46H83N3O15P2	-2	cytosol	None					No Big ID, No KeggID, Using SEED model metabolite description
cpd15716_c0	cpd15716_c	cpd15716_c	cpd15716_c	cpd15716	155	cpd15716_c0	Diisoheptadecanoylphosphatidylglycerophosphate		C40H78O13P2	-2	cytosol	None					No Big ID, No KeggID, Using SEED model metabolite description
cpd00129_c0	pro__L_c	pro__L_c	pro__L_c	pro-L	156	cpd00129_c0	L-Proline		C5H8NO2	-1	cytosol	C00148,D00035					According to Big ID database, OK
cpd00246_c0	ins_c	ins_c	ins_c	ins	157	cpd00246_c0	Inosine		C10H12N4O5	0	cytosol	C00294,D00054					According to Big ID database, OK
cpd00246_e0	ins_e	ins_e	ins_e	ins	158	cpd00246_e0	Inosine		C10H12N4O5	0	extracellular	C00294,D00054					According to Big ID database, OK
cpd15421_c0	cdpdodecg_c	cdpdodecg_c	cdpdodecg_c	cdpdodecg	159	cpd15421_c0	CDP-1,2-dioctadecanoylglycerol		C48H87N3O15P2	-2	cytosol	None					According to Big ID database		cdpdodecg_c
cpd15526_c0	pa180_c	pa180_c	pa180_c	pa180	160	cpd15526_c0	1,2-dioctadecanoyl-sn-glycerol 3-phosphate		C39H76O8P	-1	cytosol	None					According to Big ID database
cpd00802_c0	f1p_c	f1p_c	f1p_c	f1p	161	cpd00802_c0	D-fructose-1-phosphate		C6H12O9P	-1	cytosol	None					According to Big ID database		f1p_c
cpd00290_c0	fdp_c	fdp_c	fdp_c	fdp	162	cpd00290_c0	D-Fructose 1,6-bisphosphate		C6H12O12P2	-2	cytosol	C00354					According to Big ID database, OK
cpd02069_c0	3php_c	3php_c	3php_c	3php	163	cpd02069_c0	3-Phosphohydroxypyruvate		C3H3O7P	-2	cytosol	C03232					According to Big ID database, OK
cpd00169_c0	3pg_c	3pg_c	3pg_c	3pg	164	cpd00169_c0	3-Phospho-D-glycerate		C3H5O7P	-2	cytosol	C00197,C00597					According to Big ID database, OK
cpd00205_c0	k_c	k_c	k_c	k	165	cpd00205_c0	Potassium		K	1	cytosol	C00238,D08403					According to Big ID database, OK
cpd00205_e0	k_e	k_e	k_e	k	166	cpd00205_e0	Potassium		K	1	extracellular	C00238,D08403					According to Big ID database, OK
cpd00034_e0	zn2_e	zn2_e	zn2_e	zn2	167	cpd00034_e0	Zinc		Zn	2	extracellular	C00038					According to Big ID database, OK
cpd00034_c0	zn2_c	zn2_c	zn2_c	zn2	168	cpd00034_c0	Zinc		Zn	2	cytosol	C00038					According to Big ID database, OK
cpd00009_e0	pi_e	pi_e	pi_e	pi	169	cpd00009_e0	Phosphate		HO4P	-2	extracellular	C00009,D05467					According to Big ID database, OK
cpd11483_c0	3hoctACP_c	3hoctACP_c	3hoctACP_c	3hoctACP	170	cpd11483_c0	(R)-3-Hydroxyoctanoyl-acyl-carrier protein		C19H35N2O9PRS	-1	cytosol	C04620					According to Big ID database, OK
cpd11490_c0	3ooctACP_c	3ooctACP_c	3ooctACP_c	3ooctACP	171	cpd11490_c0	3-Oxooctanoyl-acyl-carrier protein		C19H33N2O9PRS	-1	cytosol	C05750					According to Big ID database, OK
cpd00024_c0	akg_c	akg_c	akg_c	akg	172	cpd00024_c0	2-Oxoglutarate		C5H4O5	-2	cytosol	C00026					According to Big ID database, OK
cpd02160_c0	sucorn_c	sucorn_c	sucorn_c	sucorn	173	cpd02160_c0	N2-Succinyl-L-ornithine		C9H15N2O5	-1	cytosol	C03415					According to Big ID database, OK
cpd02730_c0	kdo8p_c	kdo8p_c	kdo8p_c	kdo8p	174	cpd02730_c0	3-Deoxy-D-manno-octulosonate 8-phosphate		C8H13O11P	-2	cytosol	C04478					According to Big ID database, OK
cpd00817_c0	ara5p_c	ara5p_c	ara5p_c	ara5p	175	cpd00817_c0	D-Arabinose 5-phosphate		C5H10O8P	-1	cytosol	C01112					According to Big ID database, OK
cpd11492_c0	malACP_c	malACP_c	malACP_c	malACP	176	cpd11492_c0	Malonyl-acyl-carrier protein		C14H22N2O10PRS	-2	cytosol	C01209					According to Big ID database, OK
cpd11570_c0	cpd11570_c	cpd11570_c	cpd11570_c	cpd11570	177	cpd11570_c0	3-Oxooctodecanoyl-ACP		C29H53N2O9PRS	-1	cytosol	None					No Big ID, No KeggID, Using SEED model metabolite description
cpd03448_c0	2ommb_c	2ommb_c	2ommb_c	2ommb	178	cpd03448_c0	2-Octaprenyl-3-methyl-6-methoxy-1,4-benzoquinone		C48H72O3	0	cytosol	C05814					According to Big ID database, OK
cpd03449_c0	cpd03449_c	cpd03449_c	cpd03449_c	cpd03449	179	cpd03449_c0	2-Octaprenyl-3-methyl-5-hydroxy-6-methoxy-1,4-benzoquinone		C48H71O4	-1	cytosol	None					No Big ID, No KeggID, Using SEED model metabolite description
cpd02229_c0	udcpdp_c	udcpdp_c	udcpdp_c	udcpdp	180	cpd02229_c0	Bactoprenyl diphosphate		C55H90O7P2	-2	cytosol	None					According to Big ID database
cpd15665_c0	mDB_peptido_CV_c	mDB_peptido_CV_c	peptido_CV_c	cpd15665	181	cpd15665_c0	Peptidoglycan polymer (n subunits)		C80H126N16O42	-4	cytosol	None					No Big ID, No KeggID, Using SEED model metabolite description changed R to H to meet big ID formulae
cpd03495_c0	uaagmda_c	uaagmda_c	uaagmda_c	uaagmda	182	cpd03495_c0	Undecaprenyl-diphospho-N-acetylmuramoyl-(N-acetylglucosamine)-L-ala-D-glu-meso-2,6-diaminopimeloyl-D-ala-D-ala		C95H152N8O28P2	-4	cytosol	C05898,G10555					According to Big ID database, OK
cpd03127_c0	td2coa_c	td2coa_c	td2coa_c	td2coa	183	cpd03127_c0	Trans-Tetradec-2-enoyl-CoA		C35H57N7O17P3S	-3	cytosol	C05273					According to Big ID database, OK
cpd03115_c0	3htdcoa_c	3htdcoa_c	3htdcoa_c	3htdcoa	184	cpd03115_c0	(S)-3-Hydroxytetradecanoyl-CoA		C35H59N7O18P3S	-3	cytosol	C05260					According to Big ID database, OK
cpd00358_c0	dutp_c	dutp_c	dutp_c	dutp	185	cpd00358_c0	dUTP		C9H12N2O14P3	-3	cytosol	C00460					According to Big ID database, OK
cpd00978_c0	dudp_c	dudp_c	dudp_c	dudp	186	cpd00978_c0	DUDP		C9H12N2O11P2	-2	cytosol	C01346					According to Big ID database, OK
cpd02826_c0	fpram_c	fpram_c	fpram_c	fpram	187	cpd02826_c0	2-(Formamido)-N1-(5-phospho-D-ribosyl)acetamidine		C8H16N3O8P	0	cytosol	C04640					According to Big ID database, OK
cpd00084_c0	cys__L_c	cys__L_c	cys__L_c	cys-L	188	cpd00084_c0	L-Cysteine		C3H7NO2S	0	cytosol	C00097,D00026					According to Big ID database, OK
cpd00722_c0	acser_c	acser_c	acser_c	acser	189	cpd00722_c0	O-Acetyl-L-serine		C5H9NO4	0	cytosol	C00979					According to Big ID database, OK
cpd00540_c0	glyb_c	glyb_c	glyb_c	glyb	190	cpd00540_c0	Glycine betaine		C5H11NO2	0	cytosol	C00719,D07523					According to Big ID database, OK
cpd00540_e0	glyb_e	glyb_e	glyb_e	glyb	191	cpd00540_e0	Glycine betaine		C5H11NO2	0	extracellular	C00719,D07523					According to Big ID database, OK
cpd15606_c0	gly_tyr__L_c	gly_tyr__L_c	gly_tyr__L_c	gly_tyr-L	192	cpd15606_c0	Gly-Tyr		C11H14N2O4	0	cytosol	None					According to Big ID database
cpd15606_e0	gly_tyr__L_e	gly_tyr__L_e	gly_tyr__L_e	gly_tyr-L	193	cpd15606_e0	Gly-Tyr		C11H14N2O4	0	extracellular	None					According to Big ID database
cpd00048_c0	so4_c	so4_c	so4_c	so4	194	cpd00048_c0	Sulfate		O4S	-2	cytosol	C00059,D05963					According to Big ID database, OK
cpd00048_e0	so4_e	so4_e	so4_e	so4	195	cpd00048_e0	Sulfate		O4S	-2	extracellular	C00059,D05963					According to Big ID database, OK
cpd00207_c0	gua_c	gua_c	gua_c	gua	196	cpd00207_c0	Guanine		C5H5N5O	0	cytosol	C00242					According to Big ID database, OK
cpd00277_c0	dgsn_c	dgsn_c	dgsn_c	dgsn	197	cpd00277_c0	Deoxyguanosine		C10H13N5O4	0	cytosol	C00330					According to Big ID database, OK
cpd00509_c0	2dr1p_c	2dr1p_c	2dr1p_c	2dr1p	198	cpd00509_c0	2-Deoxy-D-ribose 1-phosphate		C5H10O7P	-1	cytosol	C00672					According to Big ID database, OK
cpd11464_c0	butACP_c	butACP_c	butACP_c	butACP	199	cpd11464_c0	Butyryl-ACP (n-C4:0ACP)		C15H27N2O8PRS	-1	cytosol	C05745					According to Big ID database, OK
cpd11486_c0	3ohexACP_c	3ohexACP_c	3ohexACP_c	3ohexACP	200	cpd11486_c0	3-Oxohexanoyl-acyl-carrier protein		C17H29N2O9PRS	-1	cytosol	C05746					According to Big ID database, OK
cpd00086_c0	ppcoa_c	ppcoa_c	ppcoa_c	ppcoa	201	cpd00086_c0	Propanoyl-CoA		C24H37N7O17P3S	-3	cytosol	C00100					According to Big ID database, OK
cpd00072_c0	f6p_c	f6p_c	f6p_c	f6p	202	cpd00072_c0	D-Fructose 6-phosphate		C6H12O9P	-1	cytosol	C00085					According to Big ID database, OK
cpd00079_c0	g6p_c	g6p_c	g6p_c	g6p	203	cpd00079_c0	D-Glucose 6-phosphate		C6H12O9P	-1	cytosol	C00092					According to Big ID database, OK
cpd00100_c0	glyc_c	glyc_c	glyc_c	glyc	204	cpd00100_c0	Glycerol		C3H8O3	0	cytosol	C00116,D00028					According to Big ID database, OK
cpd11467_c0	tmrs2eACP_c	tmrs2eACP_c	tmrs2eACP_c	tmrs2eACP	205	cpd11467_c0	Trans-Tetradec-2-enoyl-acyl-carrier protein		C25H45N2O8PRS	-1	cytosol	C05760					According to Big ID database, OK
cpd15561_c0	q8h2_c	q8h2_c	q8h2_c	q8h2	206	cpd15561_c0	Ubiquinol-8		C49H76O4	0	cytosol	None					According to Big ID database		q8h2_c
cpd15560_c0	q8_c	q8_c	q8_c	q8	207	cpd15560_c0	Ubiquinone-8		C49H74O4	0	cytosol	C17569					According to Big ID database, OK
cpd00013_c0	nh4_c	nh4_c	nh4_c	nh4	208	cpd00013_c0	Ammonium		H4N	1	cytosol	None					According to Big ID database		nh4_c
cpd00053_c0	gln__L_c	gln__L_c	gln__L_c	gln-L	209	cpd00053_c0	L-Glutamine		C5H10N2O3	0	cytosol	C00064,D00015					According to Big ID database, OK
cpd00094_c0	2obut_c	2obut_c	2obut_c	2obut	210	cpd00094_c0	2-Oxobutanoate		C4H5O3	-1	cytosol	C00109					According to Big ID database, OK
cpd00238_c0	s7p_c	s7p_c	s7p_c	s7p	211	cpd00238_c0	Sedoheptulose 7-phosphate		C7H14O10P	-1	cytosol	C05382,C20956					According to Big ID database, OK
cpd00198_c0	xu5p__D_c	xu5p__D_c	xu5p__D_c	xu5p__D	212	cpd00198_c0	D-Xylulose 5-phosphate		C5H10O8P	-1	cytosol	C00231					According to Big ID database, OK
cpd00101_c0	r5p_c	r5p_c	r5p_c	r5p	213	cpd00101_c0	Alpha-D-Ribose 5-phosphate		C5H10O8P	-1	cytosol	C03736					According to Big ID database, OK
cpd00115_c0	datp_c	datp_c	datp_c	datp	214	cpd00115_c0	dATP		C10H13N5O12P3	-3	cytosol	C00131					According to Big ID database, OK
cpd08210_c0	4adcho_c	4adcho_c	4adcho_c	4adcho	215	cpd08210_c0	4-amino-4-deoxychorismate		C10H10NO5	-1	cytosol	C11355					According to Big ID database, OK
cpd00443_c0	4abz_c	4abz_c	4abz_c	4abz	216	cpd00443_c0	4-Aminobenzoate		C7H6NO2	-1	cytosol	C00568,D02456					According to Big ID database, OK
cpd00186_c0	glu__D_c	glu__D_c	glu__D_c	glu__D	217	cpd00186_c0	D-Glutamate		C5H8NO4	-1	cytosol	C00217					According to Big ID database, OK
cpd00106_e0	fum_e	fum_e	fum_e	fum	218	cpd00106_e0	Fumarate		C4H2O4	-2	extracellular	C00122,D02308					According to Big ID database, OK
cpd00042_c0	gthrd_c	gthrd_c	gthrd_c	gthrd	219	cpd00042_c0	GSH		C10H16N3O6S	-1	cytosol	None					According to Big ID database
cpd00863_c0	g6p_B_c	g6p_B_c	g6p_B_c	g6p_B	220	cpd00863_c0	Beta D glucose 6 phosphate C6H11O9P		C6H12O9P	-1	cytosol	C01172					According to Big ID database, OK
cpd00415_c0	hqn_c	hqn_c	hqn_c	hqn	221	cpd00415_c0	Hydroquinone		C6H6O2	0	cytosol	C15603					According to Big ID database, OK
cpd03697_c0	arbt6p_c	arbt6p_c	arbt6p_c	arbt6p	222	cpd03697_c0	Arbutin 6-phosphate		C12H16O10P	-1	cytosol	C06187					According to Big ID database, OK
cpd00162_c0	etha_c	etha_c	etha_c	etha	223	cpd00162_c0	Ethanolamine		C2H8NO	1	cytosol	C00189,D05074					According to Big ID database, OK
cpd00264_c0	spmd_c	spmd_c	spmd_c	spmd	224	cpd00264_c0	Spermidine		C7H22N3	3	cytosol	C00315					According to Big ID database, OK
cpd00264_e0	spmd_e	spmd_e	spmd_e	spmd	225	cpd00264_e0	Spermidine		C7H22N3	3	extracellular	C00315					According to Big ID database, OK
cpd15521_c0	pa120_c	pa120_c	pa120_c	pa120	226	cpd15521_c0	1,2-didodecanoyl-sn-glycerol 3-phosphate		C27H52O8P	-1	cytosol	None					According to Big ID database
cpd11518_c0	cpd11518_c	cpd11518_c	cpd11518_c	cpd11518	227	cpd11518_c0	14-methyl-trans-hexa-dec-2-enoyl-ACP		C28H51N2O8PRS	-1	cytosol	None					No Big ID, No KeggID, Using SEED model metabolite description
cpd11517_c0	cpd11517_c	cpd11517_c	cpd11517_c	cpd11517	228	cpd11517_c0	14-methyl-3-hydroxy-hexa-decanoyl-ACP		C28H53N2O9PRS	-1	cytosol	None					No Big ID, No KeggID, Using SEED model metabolite description
cpd00911_c0	6pgl_c	6pgl_c	6pgl_c	6pgl	229	cpd00911_c0	6-phospho-D-glucono-1,5-lactone		C6H10O9P	-1	cytosol	C01236					According to Big ID database, OK
cpd11522_c0	cpd11522_c	cpd11522_c	cpd11522_c	cpd11522	230	cpd11522_c0	5-methyl-3-hydroxy-hexanoyl-ACP		C18H33N2O9PRS	-1	cytosol	None					No Big ID, No KeggID, Using SEED model metabolite description
cpd11523_c0	cpd11523_c	cpd11523_c	cpd11523_c	cpd11523	231	cpd11523_c0	5-methyl-trans-hex-2-enoyl-ACP		C18H31N2O8PRS	-1	cytosol	None					No Big ID, No KeggID, Using SEED model metabolite description
cpd00236_c0	e4p_c	e4p_c	e4p_c	e4p	232	cpd00236_c0	D-Erythrose 4-phosphate		C4H8O7P	-1	cytosol	C00279,C03109					According to Big ID database, OK
cpd15419_c0	cdpdhdecg_c	cdpdhdecg_c	cdpdhdecg_c	cdpdhdecg	233	cpd15419_c0	CDP-1,2-dihexadecanoylglycerol		C44H79N3O15P2	-2	cytosol	None					According to Big ID database		cdpdhdecg_c
cpd00297_c0	dtdp_c	dtdp_c	dtdp_c	dtdp	234	cpd00297_c0	DTDP		C10H14N2O11P2	-2	cytosol	C00363					According to Big ID database, OK
cpd11830_c0	alpro_c	alpro_c	alpro_c	alpro	235	cpd11830_c0	S Aminomethyldihydrolipoylprotein CH6NS2X		C2H7NRS2	1	cytosol	C01242					According to Big ID database, OK
cpd12005_c0	lpro_c	lpro_c	lpro_c	lpro	236	cpd12005_c0	Lipoylprotein S2X		CHRS2	0	cytosol	C02051					According to Big ID database, OK
cpd00025_c0	h2o2_c	h2o2_c	h2o2_c	h2o2	237	cpd00025_c0	Hydrogen peroxide		H2O2	0	cytosol	C00027,D00008					According to Big ID database, OK
cpd02691_c0	3hmbcoa_c	3hmbcoa_c	3hmbcoa_c	3hmbcoa	238	cpd02691_c0	(S)-3-Hydroxy-2-methylbutyryl-CoA		C26H41N7O18P3S	-3	cytosol	C04405					According to Big ID database, OK
cpd02124_c0	2maacoa_c	2maacoa_c	2maacoa_c	2maacoa	239	cpd02124_c0	2-Methyl-3-acetoacetyl-CoA		C26H39N7O18P3S	-3	cytosol	C03344					According to Big ID database, OK
cpd00655_c0	dpcoa_c	dpcoa_c	dpcoa_c	dpcoa	240	cpd00655_c0	Dephospho-CoA		C21H33N7O13P2S	-2	cytosol	C00882					According to Big ID database, OK
cpd00343_c0	cbasp_c	cbasp_c	cbasp_c	cbasp	241	cpd00343_c0	N-Carbamoyl-L-aspartate		C5H6N2O5	-2	cytosol	C00438					According to Big ID database, OK
cpd00146_c0	cbp_c	cbp_c	cbp_c	cbp	242	cpd00146_c0	Carbamoyl phosphate		CH3NO5P	-1	cytosol	C00169					According to Big ID database, OK
cpd00200_c0	4mop_c	4mop_c	4mop_c	4mop	243	cpd00200_c0	4-Methyl-2-oxopentanoate		C6H9O3	-1	cytosol	C00233					According to Big ID database, OK
cpd00107_c0	leu__L_c	leu__L_c	leu__L_c	leu-L	244	cpd00107_c0	L-Leucine		C6H13NO2	0	cytosol	C00123,D00030					According to Big ID database, OK
cpd01777_c0	prbamp_c	prbamp_c	prbamp_c	prbamp	245	cpd01777_c0	1-(5-Phosphoribosyl)-AMP		C15H21N5O14P2	-2	cytosol	C02741					According to Big ID database, OK
cpd01775_c0	prbatp_c	prbatp_c	prbatp_c	prbatp	246	cpd01775_c0	1-(5-Phosphoribosyl)-ATP		C15H21N5O20P4	-4	cytosol	C02739					According to Big ID database, OK
cpd00075_c0	no2_c	no2_c	no2_c	no2	247	cpd00075_c0	Nitrite		NO2	-1	cytosol	C00088					According to Big ID database, OK
cpd00209_c0	no3_c	no3_c	no3_c	no3	248	cpd00209_c0	Nitrate		NO3	-1	cytosol	C00244,D02313					According to Big ID database, OK
cpd00085_c0	ala_B_c	ala_B_c	ala_B_c	ala_B	249	cpd00085_c0	Beta-Alanine		C3H7NO2	0	cytosol	C00099,D07561					According to Big ID database, OK
cpd00191_c0	msa_c	msa_c	msa_c	msa	250	cpd00191_c0	Malonate semialdehyde		C3H3O3	-1	cytosol	C00222,C12069					According to Big ID database, OK
cpd11471_c0	toct2eACP_c	toct2eACP_c	toct2eACP_c	toct2eACP	251	cpd11471_c0	Trans-Oct-2-enoyl-acyl-carrier protein		C19H33N2O8PRS	-1	cytosol	C05751					According to Big ID database, OK
cpd00159_c0	lac__L_c	lac__L_c	lac__L_c	lac-L	252	cpd00159_c0	L-Lactate		C3H5O3	-1	cytosol	C00186					According to Big ID database, OK
cpd00834_c0	pan4p_c	pan4p_c	pan4p_c	pan4p	253	cpd00834_c0	Pantetheine 4-phosphate		C11H22N2O7PS	-1	cytosol	C01134					According to Big ID database, OK
cpd02666_c0	4ppcys_c	4ppcys_c	4ppcys_c	4ppcys	254	cpd02666_c0	N-((R)-4-Phosphopantothenoyl)-L-cysteine		C12H21N2O9PS	-2	cytosol	C04352					According to Big ID database, OK
cpd15378_c0	4hba_c	4hba_c	4hba_c	4hba	255	cpd15378_c0	4-Hydroxy-benzyl alcohol		C7H8O2	0	cytosol	C17467					According to Big ID database, OK
cpd00018_c0	amp_c	amp_c	amp_c	amp	256	cpd00018_c0	AMP		C10H13N5O7P	-1	cytosol	C00020,D02769,D06299					According to Big ID database, OK
cpd00069_c0	tyr__L_c	tyr__L_c	tyr__L_c	tyr-L	257	cpd00069_c0	L-Tyrosine		C9H11NO3	0	cytosol	C00082,D00022					According to Big ID database, OK
cpd02654_c0	4mpetz_c	4mpetz_c	4mpetz_c	4mpetz	258	cpd02654_c0	4-Methyl-5-(2-phosphoethyl)-thiazole		C6H9NO4PS	-1	cytosol	C04327					According to Big ID database, OK
cpd02979_c0	prfp_c	prfp_c	prfp_c	prfp	259	cpd02979_c0	1-(5-Phosphoribosyl)-5-(5-phosphoribosylamino)methylideneaminoimidazole-4-carboxamide		C15H23N5O15P2	-2	cytosol	C04896					According to Big ID database, OK
cpd02991_c0	prlp_c	prlp_c	prlp_c	prlp	260	cpd02991_c0	5-(5-phospho-1-deoxyribulos-1-ylamino)methylideneamino-1-(5-phosphoribosyl)imidazole-4-carboxamide		C15H23N5O15P2	-2	cytosol	C04916					According to Big ID database, OK
cpd00129_e0	pro__L_e	pro__L_e	pro__L_e	pro-L	261	cpd00129_e0	L-Proline		C5H8NO2	-1	extracellular	C00148,D00035					According to Big ID database, OK
cpd00412_c0	duri_c	duri_c	duri_c	duri	262	cpd00412_c0	Deoxyuridine		C9H12N2O5	0	cytosol	C00526					According to Big ID database, OK
cpd00299_c0	dump_c	dump_c	dump_c	dump	263	cpd00299_c0	DUMP		C9H12N2O8P	-1	cytosol	C00365					According to Big ID database, OK
cpd00550_c0	ser__D_c	ser__D_c	ser__D_c	ser-D	264	cpd00550_c0	D-Serine		C3H7NO3	0	cytosol	C00740					According to Big ID database, OK
cpd00550_e0	ser__D_e	ser__D_e	ser__D_e	ser-D	265	cpd00550_e0	D-Serine		C3H7NO3	0	extracellular	C00740					According to Big ID database, OK
cpd00095_c0	dhap_c	dhap_c	dhap_c	dhap	266	cpd00095_c0	Dihydroxyacetone phosphate		C3H6O6P	-1	cytosol	C00111					According to Big ID database, OK
cpd00080_e0	glyc3p_e	glyc3p_e	glyc3p_e	glyc3p	267	cpd00080_e0	Glycerol 3-phosphate		C3H8O6P	-1	extracellular	C00093					According to Big ID database, OK
cpd00193_c0	aps_c	aps_c	aps_c	aps	268	cpd00193_c0	Adenosine 5-phosphosulfate		C10H12N5O10PS	-2	cytosol	C00224					According to Big ID database, OK
cpd00087_c0	thf_c	thf_c	thf_c	thf	269	cpd00087_c0	5,6,7,8-Tetrahydrofolate		C19H21N7O6	-2	cytosol	C00101					According to Big ID database, OK
cpd00119_c0	his__L_c	his__L_c	his__L_c	his-L	270	cpd00119_c0	L-Histidine		C6H9N3O2	0	cytosol	C00135,D00032					According to Big ID database, OK
cpd00119_e0	his__L_e	his__L_e	his__L_e	his-L	271	cpd00119_e0	L-Histidine		C6H9N3O2	0	extracellular	C00135,D00032					According to Big ID database, OK
cpd11586_c0	ala_L_glu__L_c	ala_L_glu__L_c	ala_L_glu__L_c	ala_L_glu-L	272	cpd11586_c0	ala-L-glu-L		C8H13N2O5	-1	cytosol	None					According to Big ID database
cpd11513_c0	cpd11513_c	cpd11513_c	cpd11513_c	cpd11513	273	cpd11513_c0	12-methyl-3-hydroxy-tetra-decanoyl-ACP		C26H49N2O9PRS	-1	cytosol	None					No Big ID, No KeggID, Using SEED model metabolite description
cpd11512_c0	cpd11512_c	cpd11512_c	cpd11512_c	cpd11512	274	cpd11512_c0	12-methyl-3-oxo-tetra-decanoyl-ACP		C26H47N2O9PRS	-1	cytosol	None					No Big ID, No KeggID, Using SEED model metabolite description
cpd11491_c0	3omrsACP_c	3omrsACP_c	3omrsACP_c	3omrsACP	275	cpd11491_c0	3-Oxotetradecanoyl-acyl-carrier protein		C25H45N2O9PRS	-1	cytosol	C05759					According to Big ID database, OK
cpd01260_c0	ddcacoa_c	ddcacoa_c	ddcacoa_c	ddcacoa	276	cpd01260_c0	Dodecanoyl-CoA (n-C12:0CoA)		C33H55N7O17P3S	-3	cytosol	C01832					According to Big ID database, OK
cpd12689_c0	3otdcoa_c	3otdcoa_c	3otdcoa_c	3otdcoa	277	cpd12689_c0	3-Oxotetradecanoyl-CoA		C35H57N7O18P3S	-3	cytosol	C05261					According to Big ID database, OK
cpd03831_c0	adphep_LD_c	adphep_LD_c	adphep_LD_c	adphep_LD	278	cpd03831_c0	ADP-L-glycero-D-manno-heptose		C17H25N5O16P2	-2	cytosol	C06398					According to Big ID database, OK
cpd03830_c0	adphep_DD_c	adphep_DD_c	adphep_DD_c	adphep_DD	279	cpd03830_c0	ADP-D-glycero-D-manno-heptose		C17H25N5O16P2	-2	cytosol	C06397					According to Big ID database, OK
cpd00289_c0	ggdp_c	ggdp_c	ggdp_c	ggdp	280	cpd00289_c0	Geranylgeranyl diphosphate C20H33O7P2		C20H34O7P2	-2	cytosol	C00353					According to Big ID database, OK
cpd01882_c0	ivcoa_c	ivcoa_c	ivcoa_c	ivcoa	281	cpd01882_c0	Isovaleryl-CoA		C26H41N7O17P3S	-3	cytosol	C02939					According to Big ID database, OK
cpd00015_c0	fad_c	fad_c	fad_c	fad	282	cpd00015_c0	Flavin adenine dinucleotide oxidized		C27H31N9O15P2	-2	cytosol	C00016,D00005					According to Big ID database, OK
cpd01966_c0	3mb2coa_c	3mb2coa_c	3mb2coa_c	3mb2coa	283	cpd01966_c0	3-Methylbut-2-enoyl-CoA		C26H39N7O17P3S	-3	cytosol	C03069					According to Big ID database, OK
cpd00982_c0	fadh2_c	fadh2_c	fadh2_c	fadh2	284	cpd00982_c0	Flavin adenine dinucleotide reduced		C27H33N9O15P2	-2	cytosol	C01352					According to Big ID database, OK
cpd11472_c0	hexACP_c	hexACP_c	hexACP_c	hexACP	285	cpd11472_c0	Hexanoyl-ACP (n-C6:0ACP)		C17H31N2O8PRS	-1	cytosol	C05749					According to Big ID database, OK
cpd00875_c0	kdo_c	kdo_c	kdo_c	kdo	286	cpd00875_c0	3-Deoxy-D-manno-2-octulosonate		C8H13O8	-1	cytosol	C01187					According to Big ID database, OK
cpd00858_c0	glu5sa_c	glu5sa_c	glu5sa_c	glu5sa	287	cpd00858_c0	L-Glutamate 5-semialdehyde		C5H9NO3	0	cytosol	C01165					According to Big ID database, OK
cpd00810_c0	orot5p_c	orot5p_c	orot5p_c	orot5p	288	cpd00810_c0	Orotidine 5-phosphate		C10H11N2O11P	-2	cytosol	C01103					According to Big ID database, OK
cpd01017_c0	cgly_c	cgly_c	cgly_c	cgly	289	cpd01017_c0	Cys-Gly		C5H10N2O3S	0	cytosol	C01419					According to Big ID database, OK
cpd01017_e0	cgly_e	cgly_e	cgly_e	cgly	290	cpd01017_e0	Cys-Gly		C5H10N2O3S	0	extracellular	C01419					According to Big ID database, OK
cpd11515_c0	cpd11515_c	cpd11515_c	cpd11515_c	cpd11515	291	cpd11515_c0	12-methyl-tetra-decanoyl-ACP		C26H49N2O8PRS	-1	cytosol	None					No Big ID, No KeggID, Using SEED model metabolite description
cpd11514_c0	cpd11514_c	cpd11514_c	cpd11514_c	cpd11514	292	cpd11514_c0	12-methyl-trans-tetra-dec-2-enoyl-ACP		C26H47N2O8PRS	-1	cytosol	None					No Big ID, No KeggID, Using SEED model metabolite description
cpd00019_c0	ahcys_c	ahcys_c	ahcys_c	ahcys	293	cpd00019_c0	S-Adenosyl-L-homocysteine		C14H20N6O5S	0	cytosol	C00021					According to Big ID database, OK
cpd01620_c0	pre2_c	pre2_c	pre2_c	pre2	294	cpd01620_c0	Dihydrosirohydrochlorin		C42H40N4O16	-8	cytosol	C02463					According to Big ID database, OK
cpd00017_c0	amet_c	amet_c	amet_c	amet	295	cpd00017_c0	S-Adenosyl-L-methionine		C15H23N6O5S	1	cytosol	C00019,D07128					According to Big ID database, OK
cpd03420_c0	pre3a_c	pre3a_c	pre3a_c	pre3a	296	cpd03420_c0	Precorrin 3 A		C43H44N4O16	-6	cytosol	C05772					According to Big ID database, OK
cpd00344_c0	forglu_c	forglu_c	forglu_c	forglu	297	cpd00344_c0	N-Formimidoyl-L-glutamate		C6H9N2O4	-1	cytosol	C00439					According to Big ID database, OK
cpd02311_c0	4izp_c	4izp_c	4izp_c	4izp	298	cpd02311_c0	4-Imidazolone-5-propanoate		C6H7N2O3	-1	cytosol	C03680					According to Big ID database, OK
cpd00014_c0	udp_c	udp_c	udp_c	udp	299	cpd00014_c0	Uridine-5-phosphate		C9H12N2O12P2	-2	cytosol	C00015,G10619					According to Big ID database, OK
cpd01997_c0	dmbzid_c	dmbzid_c	dmbzid_c	dmbzid	300	cpd01997_c0	5,6-Dimethylbenzimidazole		C9H10N2	0	cytosol	C03114					According to Big ID database, OK
cpd00218_c0	nac_c	nac_c	nac_c	nac	301	cpd00218_c0	Nicotinate		C6H4NO2	-1	cytosol	C00253,D00049					According to Big ID database, OK
cpd00873_c0	nicrnt_c	nicrnt_c	nicrnt_c	nicrnt	302	cpd00873_c0	Nicotinate D-ribonucleotide		C11H13NO9P	-1	cytosol	C01185					According to Big ID database, OK
cpd02904_c0	5prdmbz_c	5prdmbz_c	5prdmbz_c	5prdmbz	303	cpd02904_c0	N1-(5-Phospho-alpha-D-ribosyl)-5,6-dimethylbenzimidazole		C14H18N2O7P	-1	cytosol	C04778					According to Big ID database, OK
cpd00475_c0	r1p_c	r1p_c	r1p_c	r1p	304	cpd00475_c0	Alpha-D-Ribose 1-phosphate		C5H10O8P	-1	cytosol	C00620					According to Big ID database, OK
cpd00309_c0	xan_c	xan_c	xan_c	xan	305	cpd00309_c0	Xanthine		C5H4N4O2	0	cytosol	C00385					According to Big ID database, OK
cpd01217_c0	xtsn_c	xtsn_c	xtsn_c	xtsn	306	cpd01217_c0	Xanthosine		C10H12N4O6	0	cytosol	C01762					According to Big ID database, OK
cpd04920_c0	gmhep1p_c	gmhep1p_c	gmhep1p_c	gmhep1p	307	cpd04920_c0	D-Glycero-D-manno-heptose 1-phosphate		C7H14O10P	-1	cytosol	C07838					According to Big ID database, OK
cpd15525_c0	pa161_c	pa161_c	pa161_c	pa161	308	cpd15525_c0	1,2-dihexadec-9-enoyl-sn-glycerol 3-phosphate		C35H64O8P	-1	cytosol	None					According to Big ID database
cpd15418_c0	cdpdhdec9eg_c	cdpdhdec9eg_c	cdpdhdec9eg_c	cdpdhdec9eg	309	cpd15418_c0	CDP-1,2-dihexadec-9-enoylglycerol		C44H75N3O15P2	-2	cytosol	None					According to Big ID database		cdpdhdec9eg_c
cpd11532_c0	cpd11532_c	cpd11532_c	cpd11532_c	cpd11532	310	cpd11532_c0	9-methyl-decanoyl-ACP		C22H41N2O8PRS	-1	cytosol	None					No Big ID, No KeggID, Using SEED model metabolite description
cpd11533_c0	cpd11533_c	cpd11533_c	cpd11533_c	cpd11533	311	cpd11533_c0	11-methyl-3-oxo-dodecanoyl-ACP		C24H43N2O9PRS	-1	cytosol	None					No Big ID, No KeggID, Using SEED model metabolite description
cpd08369_c0	copre3_c	copre3_c	copre3_c	copre3	312	cpd08369_c0	Cobalt-precorrin 3		C43H42CoN4O16	-6	cytosol	C11539					According to Big ID database, OK
cpd08368_c0	copre2_c	copre2_c	copre2_c	copre2	313	cpd08368_c0	Cobalt-precorrin 2		C42H40CoN4O16	-6	cytosol	C11538					According to Big ID database, OK
cpd00345_c0	5mthf_c	5mthf_c	5mthf_c	5mthf	314	cpd00345_c0	5-Methyltetrahydrofolate		C20H23N7O6	-2	cytosol	C00440,D09353					According to Big ID database, OK
cpd00125_c0	mlthf_c	mlthf_c	mlthf_c	mlthf	315	cpd00125_c0	5,10-Methylenetetrahydrofolate		C20H21N7O6	-2	cytosol	C00143					According to Big ID database, OK
cpd00890_c0	uama_c	uama_c	uama_c	uama	316	cpd00890_c0	UDP-N-acetylmuramoyl-L-alanine		C23H33N4O20P2	-3	cytosol	C01212					According to Big ID database, OK
cpd00773_c0	uamr_c	uamr_c	uamr_c	uamr	317	cpd00773_c0	UDP-N-acetylmuramate		C20H28N3O19P2	-3	cytosol	C01050					According to Big ID database, OK
cpd03002_c0	lipidAds_c	lipidAds_c	lipidAds_c	lipidAds	318	cpd03002_c0	Lipid A Disaccharide		C68H128N2O20P	-1	cytosol	C04932					According to Big ID database, OK
cpd02835_c0	u23ga_c	u23ga_c	u23ga_c	u23ga	319	cpd02835_c0	UDP-2,3-bis(3-hydroxytetradecanoyl)glucosamine		C43H75N3O20P2	-2	cytosol	C04652					According to Big ID database, OK
cpd11499_c0	cpd11499_c	cpd11499_c	cpd11499_c	cpd11499	320	cpd11499_c0	4-methyl-hexanoyl-ACP		C18H33N2O8PRS	-1	cytosol	None					No Big ID, No KeggID, Using SEED model metabolite description
cpd11500_c0	cpd11500_c	cpd11500_c	cpd11500_c	cpd11500	321	cpd11500_c0	6-methyl-3-oxo-octanoyl-ACP		C20H35N2O9PRS	-1	cytosol	None					No Big ID, No KeggID, Using SEED model metabolite description
cpd02210_c0	3ig3p_c	3ig3p_c	3ig3p_c	3ig3p	322	cpd02210_c0	C-(3-Indolyl)-glycerol 3-phosphate		C11H13NO6P	-1	cytosol	C03506					According to Big ID database, OK
cpd00359_c0	indole_c	indole_c	indole_c	indole	323	cpd00359_c0	Indole		C8H7N	0	cytosol	C00463					According to Big ID database, OK
cpd02720_c0	5aprbu_c	5aprbu_c	5aprbu_c	5aprbu	324	cpd02720_c0	5-Amino-6-(5-phosphoribitylamino)uracil		C9H16N4O9P	-1	cytosol	C04454					According to Big ID database, OK
cpd00931_c0	5apru_c	5apru_c	5apru_c	5apru	325	cpd00931_c0	5-Amino-6-(5-phosphoribosylamino)uracil		C9H14N4O9P	-1	cytosol	C01268					According to Big ID database, OK
cpd11469_c0	tddec2eACP_c	tddec2eACP_c	tddec2eACP_c	tddec2eACP	326	cpd11469_c0	Trans-Dodec-2-enoyl-acyl-carrier protein		C23H41N2O8PRS	-1	cytosol	C05758					According to Big ID database, OK
cpd11468_c0	ddcaACP_c	ddcaACP_c	ddcaACP_c	ddcaACP	327	cpd11468_c0	Dodecanoyl-ACP (n-C12:0ACP)		C23H43N2O8PRS	-1	cytosol	C05223					According to Big ID database, OK
cpd00350_c0	frdp_c	frdp_c	frdp_c	frdp	328	cpd00350_c0	Farnesyl diphosphate		C15H26O7P2	-2	cytosol	C00448					According to Big ID database, OK
cpd11573_c0	cpd11573_c	cpd11573_c	cpd11573_c	cpd11573	329	cpd11573_c0	Octodecanoyl-ACP		C29H55N2O8PRS	-1	cytosol	None					No Big ID, No KeggID, Using SEED model metabolite description
cpd11572_c0	cpd11572_c	cpd11572_c	cpd11572_c	cpd11572	330	cpd11572_c0	trans-Octodec-2-enoyl-ACP		C29H53N2O8PRS	-1	cytosol	None					No Big ID, No KeggID, Using SEED model metabolite description
cpd01080_c0	ocdca_c	ocdca_c	ocdca_c	ocdca	331	cpd01080_c0	Octadecanoate (n-C18:0)		C18H35O2	-1	cytosol	C01530,D00119					According to Big ID database, OK
cpd11496_c0	cpd11496_c	cpd11496_c	cpd11496_c	cpd11496	332	cpd11496_c0	4-methyl-3-oxo-hexanoyl-ACP		C18H31N2O9PRS	-1	cytosol	None					No Big ID, No KeggID, Using SEED model metabolite description
cpd11495_c0	cpd11495_c	cpd11495_c	cpd11495_c	cpd11495	333	cpd11495_c0	2-methylbutyryl-ACP		C16H29N2O8PRS	-1	cytosol	None					No Big ID, No KeggID, Using SEED model metabolite description
cpd02498_c0	23dhmb_c	23dhmb_c	23dhmb_c	23dhmb	334	cpd02498_c0	(R)-2,3-Dihydroxy-3-methylbutanoate		C5H9O4	-1	cytosol	C04272					According to Big ID database, OK
cpd15331_c0	1tdecg3p_c	1tdecg3p_c	1tdecg3p_c	1tdecg3p	335	cpd15331_c0	1-tetradecanoyl-sn-glycerol 3-phosphate		C17H34O7P	-1	cytosol	None					According to Big ID database		1tdecg3p_c
cpd01695_c0	tdcoa_c	tdcoa_c	tdcoa_c	tdcoa	336	cpd01695_c0	Tetradecanoyl-CoA (n-C14:0CoA)		C35H59N7O17P3S	-3	cytosol	C02593					According to Big ID database, OK
cpd00809_c0	phom_c	phom_c	phom_c	phom	337	cpd00809_c0	O-Phospho-L-homoserine		C4H9NO6P	-1	cytosol	C01102					According to Big ID database, OK
cpd11465_c0	but2eACP_c	but2eACP_c	but2eACP_c	but2eACP	338	cpd11465_c0	But-2-enoyl-acyl-carrier protein		C15H25N2O8PRS	-1	cytosol	C04246					According to Big ID database, OK
cpd00062_c0	utp_c	utp_c	utp_c	utp	339	cpd00062_c0	UTP		C9H12N2O15P3	-3	cytosol	C00075					According to Big ID database, OK
cpd00521_c0	dtdp4d6dg_c	dtdp4d6dg_c	dtdp4d6dg_c	dtdp4d6dg	340	cpd00521_c0	DTDP-4-dehydro-6-deoxy-D-glucose		C16H22N2O15P2	-2	cytosol	C11907					According to Big ID database, OK
cpd00134_c0	pmtcoa_c	pmtcoa_c	pmtcoa_c	pmtcoa	341	cpd00134_c0	Palmitoyl-CoA (n-C16:0CoA)		C37H63N7O17P3S	-3	cytosol	C00154					According to Big ID database, OK
cpd11540_c0	cpd11540_c	cpd11540_c	cpd11540_c	cpd11540	342	cpd11540_c0	13-methyl-tetra-decanoyl-ACP		C26H49N2O8PRS	-1	cytosol	None					No Big ID, No KeggID, Using SEED model metabolite description
cpd00288_c0	gam6p_c	gam6p_c	gam6p_c	gam6p	343	cpd00288_c0	D-Glucosamine 6-phosphate		C6H14NO8P	0	cytosol	C00352					According to Big ID database, OK
cpd11586_e0	ala_L_glu__L_e	ala_L_glu__L_e	ala_L_glu__L_e	ala_L_glu-L	344	cpd11586_e0	ala-L-glu-L		C8H13N2O5	-1	extracellular	None					According to Big ID database
cpd00060_e0	met__L_e	met__L_e	met__L_e	met-L	345	cpd00060_e0	L-Methionine		C5H11NO2S	0	extracellular	C00073,D00019,D04984					According to Big ID database, OK
cpd00201_c0	10fthf_c	10fthf_c	10fthf_c	10fthf	346	cpd00201_c0	10-Formyltetrahydrofolate		C20H21N7O7	-2	cytosol	C00234					According to Big ID database, OK
cpd02851_c0	aicar_c	aicar_c	aicar_c	aicar	347	cpd02851_c0	5-Amino-1-(5-Phospho-D-ribosyl)imidazole-4-carboxamide		C9H14N4O8P	-1	cytosol	C04677					According to Big ID database, OK
cpd02884_c0	fprica_c	fprica_c	fprica_c	fprica	348	cpd02884_c0	5-Formamido-1-(5-phospho-D-ribosyl)imidazole-4-carboxamide		C10H14N4O9P	-1	cytosol	C04734					According to Big ID database, OK
cpd11503_c0	cpd11503_c	cpd11503_c	cpd11503_c	cpd11503	349	cpd11503_c0	6-methyl-octanoyl-ACP		C20H37N2O8PRS	-1	cytosol	None					No Big ID, No KeggID, Using SEED model metabolite description
cpd11504_c0	cpd11504_c	cpd11504_c	cpd11504_c	cpd11504	350	cpd11504_c0	8-methyl-3-oxo-decanoyl-ACP		C22H39N2O9PRS	-1	cytosol	None					No Big ID, No KeggID, Using SEED model metabolite description
cpd00868_c0	2h34hppr_c	2h34hppr_c	2h34hppr_c	2h34hppr	351	cpd00868_c0	p-hydroxyphenylpyruvate		C9H7O4	-1	cytosol	C01179,C05350					According to Big ID database
cpd03421_c0	cobya_c	cobya_c	cobya_c	cobya	352	cpd03421_c0	Cobyrinate		C45H53CoN4O14	-5	cytosol	C05773					According to Big ID database, OK
cpd08375_c0	copre8_c	copre8_c	copre8_c	copre8	353	cpd08375_c0	Cobalt-precorrin 8		C45H53CoN4O14	-5	cytosol	C11545					According to Big ID database, OK
cpd15327_c0	1hdecg3p_c	1hdecg3p_c	1hdecg3p_c	1hdecg3p	354	cpd15327_c0	1-hexadecanoyl-sn-glycerol 3-phosphate		C19H38O7P	-1	cytosol	None					According to Big ID database		1hdecg3p_c
cpd00149_c0	cobalt2_c	cobalt2_c	cobalt2_c	cobalt2	355	cpd00149_c0	Co2+		Co	2	cytosol	C00175,C19171					According to Big ID database, OK
cpd00516_c0	26dap__M_c	26dap__M_c	26dap__M_c	26dap-M	356	cpd00516_c0	Meso-2,6-Diaminoheptanedioate		C7H14N2O4	0	cytosol	C00680					According to Big ID database, OK
cpd03118_c0	3hdcoa_c	3hdcoa_c	3hdcoa_c	3hdcoa	357	cpd03118_c0	(S)-3-Hydroxydecanoyl-CoA		C31H51N7O18P3S	-3	cytosol	C05264					According to Big ID database, OK
cpd03119_c0	3odcoa_c	3odcoa_c	3odcoa_c	3odcoa	358	cpd03119_c0	3-Oxodecanoyl-CoA		C31H49N7O18P3S	-3	cytosol	C05265					According to Big ID database, OK
cpd00221_c0	lac__D_c	lac__D_c	lac__D_c	lac__D	359	cpd00221_c0	D-Lactate		C3H5O3	-1	cytosol	C00256					According to Big ID database, OK
cpd00132_c0	asn__L_c	asn__L_c	asn__L_c	asn-L	360	cpd00132_c0	L-Asparagine		C4H8N2O3	0	cytosol	C00152					According to Big ID database, OK
cpd11581_c0	gly_asn__L_c	gly_asn__L_c	gly_asn__L_c	gly_asn-L	361	cpd11581_c0	gly-asn-L		C6H11N3O4	0	cytosol	None					According to Big ID database
cpd00525_c0	uamag_c	uamag_c	uamag_c	uamag	362	cpd00525_c0	UDP-N-acetylmuramoyl-L-alanyl-D-glutamate		C28H39N5O23P2	-4	cytosol	C00692					According to Big ID database, OK
cpd11521_c0	cpd11521_c	cpd11521_c	cpd11521_c	cpd11521	363	cpd11521_c0	5-methyl-3-oxo-hexanoyl-ACP		C18H31N2O9PRS	-1	cytosol	None					No Big ID, No KeggID, Using SEED model metabolite description
cpd11539_c0	cpd11539_c	cpd11539_c	cpd11539_c	cpd11539	364	cpd11539_c0	13-methyl-trans-tetra-dec-2-enoyl-ACP		C26H47N2O8PRS	-1	cytosol	None					No Big ID, No KeggID, Using SEED model metabolite description
cpd00638_c0	dnad_c	dnad_c	dnad_c	dnad	365	cpd00638_c0	Deamino-NAD+		C21H24N6O15P2	-2	cytosol	C00857					According to Big ID database, OK
cpd00126_c0	gmp_c	gmp_c	gmp_c	gmp	366	cpd00126_c0	GMP		C10H13N5O8P	-1	cytosol	C00144					According to Big ID database, OK
cpd00103_c0	prpp_c	prpp_c	prpp_c	prpp	367	cpd00103_c0	5-Phospho-alpha-D-ribose 1-diphosphate		C5H10O14P3	-3	cytosol	C00119					According to Big ID database, OK
cpd02978_c0	ahdt_c	ahdt_c	ahdt_c	ahdt	368	cpd02978_c0	2-Amino-4-hydroxy-6-(erythro-1,2,3-trihydroxypropyl)dihydropteridine triphosphate		C9H13N5O13P3	-3	cytosol	C04895					According to Big ID database, OK
cpd00177_c0	dadp_c	dadp_c	dadp_c	dadp	369	cpd00177_c0	DADP		C10H13N5O9P2	-2	cytosol	C00206					According to Big ID database, OK
cpd02820_c0	uaccg_c	uaccg_c	uaccg_c	uaccg	370	cpd02820_c0	UDP-N-acetyl-3-O-(1-carboxyvinyl)-D-glucosamine		C20H26N3O19P2	-3	cytosol	C04631					According to Big ID database, OK
cpd03446_c0	2omph_c	2omph_c	2omph_c	2omph	371	cpd03446_c0	2-Octaprenyl-6-methoxyphenol		C47H72O2	0	cytosol	C05812					According to Big ID database, OK
cpd03445_c0	2ohph_c	2ohph_c	2ohph_c	2ohph	372	cpd03445_c0	2-Octaprenyl-6-hydroxyphenol		C46H70O2	0	cytosol	C05811					According to Big ID database, OK
cpd15527_c0	pa181_c	pa181_c	pa181_c	pa181	373	cpd15527_c0	1,2-dioctadec-11-enoyl-sn-glycerol 3-phosphate		C39H72O8P	-1	cytosol	None					According to Big ID database
cpd11502_c0	cpd11502_c	cpd11502_c	cpd11502_c	cpd11502	374	cpd11502_c0	6-methyl-trans-oct-2-enoyl-ACP		C20H35N2O8PRS	-1	cytosol	None					No Big ID, No KeggID, Using SEED model metabolite description
cpd00117_c0	ala__D_c	ala__D_c	ala__D_c	ala-D	375	cpd00117_c0	D-Alanine		C3H7NO2	0	cytosol	C00133					According to Big ID database, OK
cpd00294_c0	damp_c	damp_c	damp_c	damp	376	cpd00294_c0	DAMP		C10H13N5O6P	-1	cytosol	C00360					According to Big ID database, OK
cpd00438_c0	dad_2_c	dad_2_c	dad_2_c	dad_2	377	cpd00438_c0	Deoxyadenosine		C10H13N5O3	0	cytosol	C00559					According to Big ID database, OK
cpd15522_c0	pa140_c	pa140_c	pa140_c	pa140	378	cpd15522_c0	1,2-ditetradecanoyl-sn-glycerol 3-phosphate		C31H60O8P	-1	cytosol	None					According to Big ID database
cpd00424_c0	cyst__L_c	cyst__L_c	cyst__L_c	cyst-L	379	cpd00424_c0	L-Cystathionine		C7H14N2O4S	0	cytosol	C02291					According to Big ID database, OK
cpd15794_c0	cpd15794_c	cpd15794_c	cpd15794_c	cpd15794	380	cpd15794_c0	Isoheptadecanoylcardiolipin (B. subtilis)		C77H148O17P2	-2	cytosol	None					No Big ID, No KeggID, Using SEED model metabolite description
cpd15722_c0	cpd15722_c	cpd15722_c	cpd15722_c	cpd15722	381	cpd15722_c0	Diisoheptadecanoylphosphatidylglycerol		C40H78O10P	-1	cytosol	None					No Big ID, No KeggID, Using SEED model metabolite description
cpd00133_c0	ncam_c	ncam_c	ncam_c	ncam	382	cpd00133_c0	Nicotinamide		C6H6N2O	0	cytosol	C00153,D00036					According to Big ID database, OK
cpd00128_c0	ade_c	ade_c	ade_c	ade	383	cpd00128_c0	Adenine		C5H5N5	0	cytosol	C00147,D00034					According to Big ID database, OK
cpd15684_c0	cpd15684_c	cpd15684_c	cpd15684_c	cpd15684	384	cpd15684_c0	CDP-1,2-dianteisoheptadecanoylglycerol		C46H83N3O15P2	-2	cytosol	None					No Big ID, No KeggID, Using SEED model metabolite description
cpd02201_c0	4ppan_c	4ppan_c	4ppan_c	4ppan	385	cpd02201_c0	D-4-Phosphopantothenate		C9H16NO8P	-2	cytosol	C03492					According to Big ID database, OK
cpd00508_c0	3mop_c	3mop_c	3mop_c	3mop	386	cpd00508_c0	(S)-3-Methyl-2-oxopentanoate		C6H9O3	-1	cytosol	C00671, C03465, C06008					According to Big ID database, OK
cpd02535_c0	23dhmp_c	23dhmp_c	23dhmp_c	23dhmp	387	cpd02535_c0	(R)-2,3-Dihydroxy-3-methylpentanoate		C6H11O4	-1	cytosol	C04104,C06007					According to Big ID database, OK
cpd00930_c0	imacp_c	imacp_c	imacp_c	imacp	388	cpd00930_c0	3-(Imidazol-4-yl)-2-oxopropyl phosphate		C6H8N2O5P	-1	cytosol	C01267					According to Big ID database, OK
cpd08372_c0	copre6_c	copre6_c	copre6_c	copre6	389	cpd08372_c0	Cobalt-precorrin 6		C44H46CoN4O16	-6	cytosol	C11542					According to Big ID database, OK
cpd00956_c0	2cpr5p_c	2cpr5p_c	2cpr5p_c	2cpr5p	390	cpd00956_c0	1-(2-Carboxyphenylamino)-1-deoxy-D-ribulose 5-phosphate		C12H14NO9P	-2	cytosol	C01302					According to Big ID database, OK
cpd00286_c0	udcpp_c	udcpp_c	udcpp_c	udcpp	391	cpd00286_c0	Undecaprenyl phosphate		C55H90O4P	-1	cytosol	C00348					According to Big ID database, OK
cpd00141_c0	ppa_c	ppa_c	ppa_c	ppa	392	cpd00141_c0	Propionate (n-C3:0)		C3H5O2	-1	cytosol	C00163,D02310					According to Big ID database, OK
cpd02103_c0	sucarg_c	sucarg_c	sucarg_c	sucarg	393	cpd02103_c0	N2-Succinyl-L-arginine		C10H17N4O5	-1	cytosol	C03296					According to Big ID database, OK
cpd00078_c0	succoa_c	succoa_c	succoa_c	succoa	394	cpd00078_c0	Succinyl-CoA		C25H36N7O19P3S	-4	cytosol	C00091					According to Big ID database, OK
cpd00027_e0	glc__D_e	glc__D_e	glc__D_e	glc-D	395	cpd00027_e0	D-Glucose		C6H12O6	0	extracellular	C00267					According to Big ID database, OK
cpd11589_e0	gly_asp__L_e	gly_asp__L_e	gly_asp__L_e	gly_asp-L	396	cpd11589_e0	gly-asp-L		C6H9N2O5	-1	extracellular	None					According to Big ID database
cpd00214_c0	hdca_c	hdca_c	hdca_c	hdca	397	cpd00214_c0	Hexadecanoate (n-C16:0)		C16H31O2	-1	cytosol	C00249,D05341					According to Big ID database, OK
cpd00082_e0	fru_e	fru_e	fru_e	fru	398	cpd00082_e0	D-Fructose		C6H12O6	0	extracellular	C00095,C01496,C10906,D00114					According to Big ID database, OK
cpd03736_c0	kdo2lipid4L_c	kdo2lipid4L_c	kdo2lipid4L_c	kdo2lipid4L	399	cpd03736_c0	KDO(2)-lipid IV(A) with laurate		C96H172N2O38P2	-4	cytosol	C06251					According to Big ID database, OK
cpd03586_c0	kdo2lipid4_c	kdo2lipid4_c	kdo2lipid4_c	kdo2lipid4	400	cpd03586_c0	KDO(2)-lipid IV(A)		C84H150N2O37P2	-4	cytosol	C06025,G11160					According to Big ID database, OK
cpd02740_c0	gdptp_c	gdptp_c	gdptp_c	gdptp	401	cpd02740_c0	Guanosine 3-diphosphate 5-triphosphate		C10H13N5O20P5	-5	cytosol	C04494					According to Big ID database, OK
cpd00274_c0	citr__L_c	citr__L_c	citr__L_c	citr-L	402	cpd00274_c0	L-Citrulline		C6H13N3O3	0	cytosol	C00327,D07706					According to Big ID database, OK
cpd00050_c0	fmn_c	fmn_c	fmn_c	fmn	403	cpd00050_c0	FMN		C17H20N4O9P	-1	cytosol	C00061					According to Big ID database, OK
cpd00171_c0	ru5p__D_c	ru5p__D_c	ru5p__D_c	ru5p__D	404	cpd00171_c0	D-Ribulose 5-phosphate		C5H10O8P	-1	cytosol	C00199					According to Big ID database, OK
cpd00118_c0	ptrc_c	ptrc_c	ptrc_c	ptrc	405	cpd00118_c0	Putrescine		C4H14N2	2	cytosol	C00134					According to Big ID database, OK
cpd00064_c0	orn_c	orn_c	orn_c	orn	406	cpd00064_c0	Ornithine		C5H13N2O2	1	cytosol	C00077,C01602,D08302					According to Big ID database, OK
cpd08287_c0	4c2me_c	4c2me_c	4c2me_c	4c2me	407	cpd08287_c0	4-(cytidine 5-diphospho)-2-C-methyl-D-erythritol		C14H23N3O14P2	-2	cytosol	C11435					According to Big ID database, OK
cpd11511_c0	cpd11511_c	cpd11511_c	cpd11511_c	cpd11511	408	cpd11511_c0	10-methyl-dodecanoyl-ACP		C24H45N2O8PRS	-1	cytosol	None					No Big ID, No KeggID, Using SEED model metabolite description
cpd11510_c0	cpd11510_c	cpd11510_c	cpd11510_c	cpd11510	409	cpd11510_c0	10-methyl-trans-dodec-2-enoyl-ACP		C24H43N2O8PRS	-1	cytosol	None					No Big ID, No KeggID, Using SEED model metabolite description
cpd15329_c0	1odecg3p_c	1odecg3p_c	1odecg3p_c	1odecg3p	410	cpd15329_c0	1-octadecanoyl-sn-glycerol 3-phosphate		C21H42O7P	-1	cytosol	None					According to Big ID database		1odecg3p_c
cpd15422_c0	cdpdtdec7eg_c	cdpdtdec7eg_c	cdpdtdec7eg_c	cdpdtdec7eg	411	cpd15422_c0	CDP-1,2-ditetradec-7-enoylglycerol		C40H67N3O15P2	-2	cytosol	None					According to Big ID database		cdpdtdec7eg_c
cpd15523_c0	pa141_c	pa141_c	pa141_c	pa141	412	cpd15523_c0	1,2-ditetradec-7-enoyl-sn-glycerol 3-phosphate		C31H56O8P	-1	cytosol	None					According to Big ID database		pa141_c
cpd00096_c0	cdp_c	cdp_c	cdp_c	cdp	413	cpd00096_c0	CDP		C9H13N3O11P2	-2	cytosol	C00112					According to Big ID database, OK
cpd15417_c0	cdpdddecg_c	cdpdddecg_c	cdpdddecg_c	cdpdddecg	414	cpd15417_c0	CDP-1,2-didodecanoylglycerol		C36H63N3O15P2	-2	cytosol	None					According to Big ID database		cdpdddecg_c
cpd00510_c0	2dr5p_c	2dr5p_c	2dr5p_c	2dr5p	415	cpd00510_c0	2-Deoxy-D-ribose 5-phosphate		C5H10O7P	-1	cytosol	C00673					According to Big ID database, OK
cpd00130_e0	mal__L_e	mal__L_e	mal__L_e	mal-L	416	cpd00130_e0	L-Malate		C4H4O5	-2	extracellular	C00149					According to Big ID database, OK
cpd00036_e0	succ_e	succ_e	succ_e	succ	417	cpd00036_e0	Succinate		C4H4O4	-2	extracellular	C00042					According to Big ID database, OK
cpd01716_c0	3dhsk_c	3dhsk_c	3dhsk_c	3dhsk	418	cpd01716_c0	3-Dehydroshikimate		C7H7O5	-1	cytosol	C02637					According to Big ID database, OK
cpd00683_c0	dhpt_c	dhpt_c	dhpt_c	dhpt	419	cpd00683_c0	Dihydropteroate		C14H13N6O3	-1	cytosol	C00921					According to Big ID database, OK
cpd00954_c0	6hmhpt_c	6hmhpt_c	6hmhpt_c	6hmhpt	420	cpd00954_c0	6-hydroxymethyl dihydropterin		C7H9N5O2	0	cytosol	C01300					According to Big ID database, OK
cpd11534_c0	cpd11534_c	cpd11534_c	cpd11534_c	cpd11534	421	cpd11534_c0	11-methyl-3-hydroxy-dodecanoyl-ACP		C24H45N2O9PRS	-1	cytosol	None					No Big ID, No KeggID, Using SEED model metabolite description
cpd02605_c0	3c4mop_c	3c4mop_c	3c4mop_c	3c4mop	422	cpd02605_c0	3-Carboxy-4-methyl-2-oxopentanoate		C7H8O5	-2	cytosol	C04236					According to Big ID database, OK
cpd02693_c0	3c2hmp_c	3c2hmp_c	3c2hmp_c	3c2hmp	423	cpd02693_c0	3-Carboxy-2-hydroxy-4-methylpentanoate		C7H10O5	-2	cytosol	C04411					According to Big ID database, OK
cpd03919_c0	adocbip_c	adocbip_c	adocbip_c	adocbip	424	cpd03919_c0	Adenosyl cobinamide phosphate		C58H84CoN16O14P	0	cytosol	C06509					According to Big ID database, OK
cpd02547_c0	applp_c	applp_c	applp_c	applp	425	cpd02547_c0	D-1-Aminopropan-2-ol O-phosphate		C3H10NO4P	0	cytosol	C04122,C04126					According to Big ID database, OK
cpd00331_c0	acon_C_c	acon_C_c	acon_C_c	acon	426	cpd00331_c0	Cis-Aconitate		C6H3O6	-3	cytosol	C00417					According to Big ID database, OK
cpd15677_c0	cpd15677_c	cpd15677_c	cpd15677_c	cpd15677	427	cpd15677_c0	1,2-diisoheptadecanoyl-sn-glycerol 3-phosphate		C37H72O8P	-1	cytosol	None					No Big ID, No KeggID, Using SEED model metabolite description
cpd11432_c0	fa11coa_c	fa11coa_c	fa11coa_c	fa11coa	428	cpd11432_c0	fa11coa		C38H65N7O17P3S	-3	cytosol	None					According to Big ID database
cpd15671_c0	cpd15671_c	cpd15671_c	cpd15671_c	cpd15671	429	cpd15671_c0	1-isoheptadecanoyl-sn-glycerol 3-phosphate		C20H40O7P	-1	cytosol	None					No Big ID, No KeggID, Using SEED model metabolite description
cpd00408_c0	pant__R_c	pant__R_c	pant__R_c	pant__R	430	cpd00408_c0	(R)-Pantoate		C6H11O4	-1	cytosol	C00522					According to Big ID database, OK
cpd00644_c0	pnto__R_c	pnto__R_c	pnto__R_c	pnto__R	431	cpd00644_c0	(R)-Pantothenate		C9H16NO5	-1	cytosol	C00864,D07413					According to Big ID database, OK
cpd00027_c0	glc__D_c	glc__D_c	glc__D_c	glc-D	432	cpd00027_c0	D-Glucose		C6H12O6	0	cytosol	C00267					According to Big ID database, OK
cpd00158_c0	cellb_c	cellb_c	cellb_c	cellb	433	cpd00158_c0	Cellobiose		C12H22O11	0	cytosol	C00185,C06422,G00289					According to Big ID database, OK
cpd03129_c0	dc2coa_c	dc2coa_c	dc2coa_c	dc2coa	434	cpd03129_c0	Trans-Dec-2-enoyl-CoA		C31H49N7O17P3S	-3	cytosol	C05275					According to Big ID database, OK
cpd00190_c0	glc_bD_c	glc_bD_c	glc_bD_c	glc_bD	435	cpd00190_c0	Beta D-glucose		C6H12O6	0	cytosol	C00221					According to Big ID database, OK
cpd03607_c0	phthr_c	phthr_c	phthr_c	phthr	436	cpd03607_c0	O-Phospho-4-hydroxy-L-threonine		C4H9NO7P	-1	cytosol	C06055					According to Big ID database, OK
cpd00338_c0	5aop_c	5aop_c	5aop_c	5aop	437	cpd00338_c0	5-Amino-4-oxopentanoate		C5H9NO3	0	cytosol	C00430,D07567					According to Big ID database, OK
cpd00689_c0	ppbng_c	ppbng_c	ppbng_c	ppbng	438	cpd00689_c0	Porphobilinogen		C10H13N2O4	-1	cytosol	C00931					According to Big ID database, OK
cpd01501_c0	2mcit_c	2mcit_c	2mcit_c	2mcit	439	cpd01501_c0	2-Methylcitrate		C7H7O7	-3	cytosol	C02225					According to Big ID database, OK
cpd00905_c0	ppgpp_c	ppgpp_c	ppgpp_c	ppgpp	440	cpd00905_c0	Guanosine 3,5-bis(diphosphate)		C10H13N5O17P4	-4	cytosol	C01228					According to Big ID database, OK
cpd00184_c0	thymd_c	thymd_c	thymd_c	thymd	441	cpd00184_c0	Thymidine		C10H14N2O5	0	cytosol	C00214,D06675					According to Big ID database, OK
cpd00298_c0	dtmp_c	dtmp_c	dtmp_c	dtmp	442	cpd00298_c0	DTMP		C10H14N2O8P	-1	cytosol	C00364					According to Big ID database, OK
cpd15795_c0	cpd15795_c	cpd15795_c	cpd15795_c	cpd15795	443	cpd15795_c0	Anteisoheptadecanoylcardiolipin (B. subtilis)		C77H148O17P2	-2	cytosol	None					No Big ID, No KeggID, Using SEED model metabolite description
cpd03279_c0	din_c	din_c	din_c	din	444	cpd03279_c0	Deoxyinosine		C10H12N4O4	0	cytosol	C05512					According to Big ID database, OK
cpd03279_e0	din_e	din_e	din_e	din	445	cpd03279_e0	Deoxyinosine		C10H12N4O4	0	extracellular	C05512					According to Big ID database, OK
cpd03835_c0	pre8_c	pre8_c	pre8_c	pre8	446	cpd03835_c0	Precorrin 8		C45H53N4O14	-7	cytosol	C06408					According to Big ID database, OK
cpd11478_c0	3hbutACP_c	3hbutACP_c	3hbutACP_c	3hbutACP	447	cpd11478_c0	(R)-3-Hydroxybutanoyl-[acyl-carrier protein]		C15H27N2O9PRS	-1	cytosol	C04618					According to Big ID database
cpd00065_c0	trp__L_c	trp__L_c	trp__L_c	trp-L	448	cpd00065_c0	L-Tryptophan		C11H12N2O2	0	cytosol	C00078,D00020					According to Big ID database, OK
cpd00235_c0	man6p_c	man6p_c	man6p_c	man6p	449	cpd00235_c0	D-Mannose 6-phosphate		C6H12O9P	-1	cytosol	C00275					According to Big ID database, OK
cpd00016_c0	pydx5p_c	pydx5p_c	pydx5p_c	pydx5p	450	cpd00016_c0	Pyridoxal 5-phosphate		C8H9NO6P	-1	cytosol	C00018					According to Big ID database, OK
cpd00110_c0	focytc_c	focytc_c	focytc_c	focytc	451	cpd00110_c0	Ferrocytochrome c C42H53FeN8O6S2		C42H52FeN8O6S2	4	cytosol	C00924					According to Big ID database, OK
cpd00109_c0	ficytC_c	ficytC_c	ficytC_c	ficytC	452	cpd00109_c0	Ferricytochrome c C42H52FeN8O6S2		C42H52FeN8O6S2	5	cytosol	C00923					According to Big ID database, OK
cpd03920_c0	agdpcbi_c	agdpcbi_c	agdpcbi_c	agdpcbi	453	cpd03920_c0	Adenosine-GDP-cobinamide		C68H96CoN21O21P2	0	cytosol	C06510					According to Big ID database, OK
cpd11529_c0	cpd11529_c	cpd11529_c	cpd11529_c	cpd11529	454	cpd11529_c0	9-methyl-3-oxo-decanoyl-ACP		C22H39N2O9PRS	-1	cytosol	None					No Big ID, No KeggID, Using SEED model metabolite description
cpd11528_c0	cpd11528_c	cpd11528_c	cpd11528_c	cpd11528	455	cpd11528_c0	7-methyl-octanoyl-ACP		C20H37N2O8PRS	-1	cytosol	None					No Big ID, No KeggID, Using SEED model metabolite description
cpd00268_e0	tsul_e	tsul_e	tsul_e	tsul	456	cpd00268_e0	Thiosulfate		O3S2	-2	extracellular	C00320,C05529					According to Big ID database, OK
cpd00284_c0	6pgc_c	6pgc_c	6pgc_c	6pgc	457	cpd00284_c0	6-Phospho-D-gluconate		C6H11O10P	-2	cytosol	C00345					According to Big ID database, OK
cpd02711_c0	2ddg6p_c	2ddg6p_c	2ddg6p_c	2ddg6p	458	cpd02711_c0	2-Dehydro-3-deoxy-D-gluconate 6-phosphate		C6H9O9P	-2	cytosol	C04442					According to Big ID database, OK
cpd15420_c0	cdpdodec11eg_c	cdpdodec11eg_c	cdpdodec11eg_c	cdpdodec11eg	459	cpd15420_c0	CDP-1,2-dioctadec-11-enoylglycerol		C48H83N3O15P2	-2	cytosol	None					According to Big ID database		cdpdodec11eg_c
cpd00033_e0	gly_e	gly_e	gly_e	gly	460	cpd00033_e0	Glycine		C2H5NO2	0	extracellular	C00037,D00011					According to Big ID database, OK
cpd10162_c0	3hmop_c	3hmop_c	3hmop_c	3hmop	461	cpd10162_c0	(R)-3-Hydroxy-3-methyl-2-oxopentanoate		C6H9O4	-1	cytosol	C04237,C14463					According to Big ID database
cpd15604_c0	gly_leu__L_c	gly_leu__L_c	gly_leu__L_c	gly_leu-L	462	cpd15604_c0	Gly-Leu		C8H16N2O3	0	cytosol	None					According to Big ID database
cpd11489_c0	3oddecACP_c	3oddecACP_c	3oddecACP_c	3oddecACP	463	cpd11489_c0	3-Oxododecanoyl-acyl-carrier protein		C23H41N2O9PRS	-1	cytosol	C05756					According to Big ID database, OK
cpd11480_c0	3hddecACP_c	3hddecACP_c	3hddecACP_c	3hddecACP	464	cpd11480_c0	(R)-3-Hydroxydodecanoyl-acyl-carrier protein		C23H43N2O9PRS	-1	cytosol	C05757					According to Big ID database, OK
cpd00114_c0	imp_c	imp_c	imp_c	imp	465	cpd00114_c0	IMP		C10H12N4O8P	-1	cytosol	C00130					According to Big ID database, OK
cpd00418_c0	no_c	no_c	no_c	no	466	cpd00418_c0	Nitric oxide		NO	0	cytosol	C00533,D00074					According to Big ID database, OK
cpd00438_e0	dad_2_e	dad_2_e	dad_2_e	dad_2	467	cpd00438_e0	Deoxyadenosine		C10H13N5O3	0	extracellular	C00559					According to Big ID database, OK
cpd02569_c0	3hmoa_c	3hmoa_c	3hmoa_c	3hmoa	468	cpd02569_c0	2-Oxo-3-hydroxyisovalerate		C5H7O4	-1	cytosol	C04181					According to Big ID database
cpd00668_c0	alac__S_c	alac__S_c	alac__S_c	alac__S	469	cpd00668_c0	(S)-2-Acetolactate		C5H7O4	-1	cytosol	C06010					According to Big ID database, OK
cpd00206_c0	dcmp_c	dcmp_c	dcmp_c	dcmp	470	cpd00206_c0	DCMP		C9H13N3O7P	-1	cytosol	C00239					According to Big ID database, OK
cpd03834_c0	pre4_c	pre4_c	pre4_c	pre4	471	cpd03834_c0	Precorrin 4		C44H45N4O17	-7	cytosol	C06407					According to Big ID database, OK
cpd03839_c0	pre5_c	pre5_c	pre5_c	pre5	472	cpd03839_c0	Precorrin 5		C45H47N4O17	-7	cytosol	C06416					According to Big ID database, OK
cpd00219_c0	pphn_c	pphn_c	pphn_c	pphn	473	cpd00219_c0	Prephenate		C10H8O6	-2	cytosol	C00254					According to Big ID database, OK
cpd11584_c0	ala_L_his__L_c	ala_L_his__L_c	ala_L_his__L_c	ala_L_his-L	474	cpd11584_c0	Ala-His		C9H14N4O3	0	cytosol	None					According to Big ID database
cpd11584_e0	ala_L_his__L_e	ala_L_his__L_e	ala_L_his__L_e	ala_L_his-L	475	cpd11584_e0	Ala-His		C9H14N4O3	0	extracellular	None					According to Big ID database
cpd00906_c0	hexdp_c	hexdp_c	hexdp_c	hexdp	476	cpd00906_c0	All trans Hexaprenyl diphosphate C30H49O7P2		C30H50O7P2	-2	cytosol	C01230					According to Big ID database, OK
cpd02591_c0	pendp_c	pendp_c	pendp_c	pendp	477	cpd02591_c0	All trans Pentaprenyl diphosphate C25H41O7P2		C25H42O7P2	-2	cytosol	C04217					According to Big ID database, OK
cpd11571_c0	cpd11571_c	cpd11571_c	cpd11571_c	cpd11571	478	cpd11571_c0	3-Hydroxyoctodecanoyl-ACP		C29H55N2O9PRS	-1	cytosol	None					No Big ID, No KeggID, Using SEED model metabolite description
cpd15604_e0	gly_leu__L_e	gly_leu__L_e	gly_leu__L_e	gly_leu-L	479	cpd15604_e0	Gly-Leu		C8H16N2O3	0	extracellular	None					According to Big ID database
cpd00105_c0	rib__D_c	rib__D_c	rib__D_c	rib-D	480	cpd00105_c0	D-Ribose		C5H10O5	0	cytosol	C00121					According to Big ID database, OK
cpd00105_e0	rib__D_e	rib__D_e	rib__D_e	rib-D	481	cpd00105_e0	D-Ribose		C5H10O5	0	extracellular	C00121					According to Big ID database, OK
cpd11505_c0	cpd11505_c	cpd11505_c	cpd11505_c	cpd11505	482	cpd11505_c0	8-methyl-3-hydroxy-decanoyl-ACP		C22H41N2O9PRS	-1	cytosol	None					No Big ID, No KeggID, Using SEED model metabolite description
cpd15557_c0	ps180_c	ps180_c	ps180_c	ps180	483	cpd15557_c0	phosphatidylserine dioctadecanoyl		C42H80NO10P	-2	cytosol	None					According to Big ID database
cpd03447_c0	2ombz_c	2ombz_c	2ombz_c	2ombz	484	cpd03447_c0	2-Octaprenyl-6-methoxy-1,4-benzoquinone		C47H70O3	0	cytosol	C05813					According to Big ID database, OK
cpd02546_c0	ckdo_c	ckdo_c	ckdo_c	ckdo	485	cpd02546_c0	CMP-3-deoxy-D-manno-octulosonate		C17H24N3O15P	-2	cytosol	C04121					According to Big ID database, OK
cpd00203_c0	13dpg_c	13dpg_c	13dpg_c	13dpg	486	cpd00203_c0	3-Phospho-D-glyceroyl phosphate		C3H6O10P2	-2	cytosol	C00236					According to Big ID database, OK
cpd00182_c0	adn_c	adn_c	adn_c	adn	487	cpd00182_c0	Adenosine		C10H13N5O4	0	cytosol	C00212,D00045,D06298					According to Big ID database, OK
cpd00793_c0	thmmp_c	thmmp_c	thmmp_c	thmmp	488	cpd00793_c0	Thiamin monophosphate		C12H17N4O4PS	0	cytosol	C01081					According to Big ID database, OK
cpd02894_c0	2mahmp_c	2mahmp_c	2mahmp_c	2mahmp	489	cpd02894_c0	2-Methyl-4-amino-5-hydroxymethylpyrimidine diphosphate		C6H9N3O7P2	-2	cytosol	C04752					According to Big ID database, OK
cpd00162_e0	etha_e	etha_e	etha_e	etha	490	cpd00162_e0	Ethanolamine		C2H8NO	1	extracellular	C00189,D05074					According to Big ID database, OK
cpd11593_c0	ala_L_asp__L_c	ala_L_asp__L_c	ala_L_asp__L_c	ala_L_asp-L	491	cpd11593_c0	ala-L-asp-L		C7H11N2O5	-1	cytosol	None					According to Big ID database
cpd11593_e0	ala_L_asp__L_e	ala_L_asp__L_e	ala_L_asp__L_e	ala_L_asp-L	492	cpd11593_e0	ala-L-asp-L		C7H11N2O5	-1	extracellular	None					According to Big ID database
cpd15488_c0	hphhlipa_c	hphhlipa_c	hphhlipa_c	hphhlipa	493	cpd15488_c0	heptosyl-phospho-heptosyl-heptosyl-kdo2-lipidA		C131H234N2O60P3	-5	cytosol	None					According to Big ID database		hphhlipa_c
cpd15549_c0	phhlipa_c	phhlipa_c	phhlipa_c	phhlipa	494	cpd15549_c0	phospho-heptosyl-heptosyl-kdo2-lipidA		C124H222N2O54P3	-5	cytosol	None					According to Big ID database		phhlipa_c
cpd11585_c0	L_alagly_c	L_alagly_c	L_alagly_c	L_alagly	495	cpd11585_c0	L-alanylglycine		C5H10N2O3	0	cytosol	None					According to Big ID database
cpd00092_c0	ura_c	ura_c	ura_c	ura	496	cpd00092_c0	Uracil		C4H4N2O2	0	cytosol	C00106,D00027,D09776					According to Big ID database, OK
cpd00142_c0	acac_c	acac_c	acac_c	acac	497	cpd00142_c0	Acetoacetate		C4H5O3	-1	cytosol	C00164					According to Big ID database, OK
cpd00292_c0	hmgcoa_c	hmgcoa_c	hmgcoa_c	hmgcoa	498	cpd00292_c0	Hydroxymethylglutaryl CoA C27H39N7O20P3S		C27H40N7O20P3S	-4	cytosol	C00356					According to Big ID database, OK
cpd08615_c0	h2mb4p_c	h2mb4p_c	h2mb4p_c	h2mb4p	499	cpd08615_c0	1-hydroxy-2-methyl-2-(E)-butenyl 4-diphosphate		C5H10O8P2	-2	cytosol	C11811					According to Big ID database, OK
cpd00045_c0	pap_c	pap_c	pap_c	pap	500	cpd00045_c0	Adenosine 3,5-bisphosphate		C10H13N5O10P2	-2	cytosol	C00054					According to Big ID database, OK
cpd00066_c0	phe__L_c	phe__L_c	phe__L_c	phe-L	501	cpd00066_c0	L-Phenylalanine		C9H11NO2	0	cytosol	C00079,D00021					According to Big ID database, OK
cpd00231_c0	dhbpt_c	dhbpt_c	dhbpt_c	dhbpt	502	cpd00231_c0	6,7-Dihydrobiopterin		C9H13N5O3	0	cytosol	C00268,C02953					According to Big ID database, OK
cpd00233_c0	thbpt_c	thbpt_c	thbpt_c	thbpt	503	cpd00233_c0	Tetrahydrobiopterin		C9H15N5O3	0	cytosol	C00272,D08505					According to Big ID database, OK
cpd00041_e0	asp__L_e	asp__L_e	asp__L_e	asp-L	504	cpd00041_e0	L-Aspartate		C4H6NO4	-1	extracellular	C00049,D00013					According to Big ID database, OK
cpd03666_c0	cpd03666_c	cpd03666_c	cpd03666_c	cpd03666	505	cpd03666_c0	2,5-Diamino-6-(5-triphosphoryl-3,4-trihydroxy-2-oxopentyl)- amino-4-oxopyrimidine		C9H15N5O14P3	-3	cytosol	None					No Big ID, No KeggID, Using SEED model metabolite description
cpd00448_c0	glyald_c	glyald_c	glyald_c	glyald	506	cpd00448_c0	D-Glyceraldehyde		C3H6O3	0	cytosol	C00577					According to Big ID database, OK
cpd11530_c0	cpd11530_c	cpd11530_c	cpd11530_c	cpd11530	507	cpd11530_c0	9-methyl-3-hydroxy-decanoyl-ACP		C22H41N2O9PRS	-1	cytosol	None					No Big ID, No KeggID, Using SEED model metabolite description
cpd03470_c0	iasp_c	iasp_c	iasp_c	iasp	508	cpd03470_c0	Iminoaspartate		C4H3NO4	-2	cytosol	C05840					According to Big ID database, OK
cpd02921_c0	25aics_c	25aics_c	25aics_c	25aics	509	cpd02921_c0	(S)-2-5-Amino-1-(5-phospho-D-ribosyl)imidazole-4-carboxamidosuccinate		C13H16N4O12P	-3	cytosol	C04823					According to Big ID database, OK
cpd00635_c0	cbl1_c	cbl1_c	cbl1_c	cbl1	510	cpd00635_c0	Cob(I)alamin		C62H89CoN13O14P	0	cytosol	C00853					According to Big ID database, OK
cpd00421_c0	pppi_c	pppi_c	pppi_c	pppi	511	cpd00421_c0	Inorganic triphosphate		HO10P3	-4	cytosol	C00536					According to Big ID database, OK
cpd00166_c0	adocbl_c	adocbl_c	adocbl_c	adocbl	512	cpd00166_c0	Adenosylcobalamin		C72H101CoN18O17P	1	cytosol	C00194,D00042					According to Big ID database, OK
cpd11527_c0	cpd11527_c	cpd11527_c	cpd11527_c	cpd11527	513	cpd11527_c0	7-methyl-trans-oct-2-enoyl-ACP		C20H35N2O8PRS	-1	cytosol	None					No Big ID, No KeggID, Using SEED model metabolite description
cpd00279_c0	aacoa_c	aacoa_c	aacoa_c	aacoa	514	cpd00279_c0	Acetoacetyl-CoA		C25H37N7O18P3S	-3	cytosol	C00332					According to Big ID database, OK
cpd00314_e0	mnl_e	mnl_e	mnl_e	mnl	515	cpd00314_e0	D-Mannitol		C6H14O6	0	extracellular	C00392,D00062					According to Big ID database, OK
cpd00202_c0	dmpp_c	dmpp_c	dmpp_c	dmpp	516	cpd00202_c0	Dimethylallyl diphosphate		C5H10O7P2	-2	cytosol	C00235					According to Big ID database, OK
cpd00523_c0	tre6p_c	tre6p_c	tre6p_c	tre6p	517	cpd00523_c0	Alpha,alpha-Trehalose 6-phosphate		C12H22O14P	-1	cytosol	C00689,G09795					According to Big ID database, OK
cpd02097_c0	glu5p_c	glu5p_c	glu5p_c	glu5p	518	cpd02097_c0	L-Glutamate 5-phosphate		C5H9NO7P	-1	cytosol	C03287					According to Big ID database, OK
cpd00100_e0	glyc_e	glyc_e	glyc_e	glyc	519	cpd00100_e0	Glycerol		C3H8O3	0	extracellular	C00116,D00028					According to Big ID database, OK
cpd00093_c0	anth_c	anth_c	anth_c	anth	520	cpd00093_c0	Anthranilate		C7H6NO2	-1	cytosol	C00108					According to Big ID database, OK
cpd03116_c0	3hddcoa_c	3hddcoa_c	3hddcoa_c	3hddcoa	521	cpd03116_c0	(S)-3-Hydroxydodecanoyl-CoA		C33H55N7O18P3S	-3	cytosol	C05262					According to Big ID database, OK
cpd02060_c0	dd2coa_c	dd2coa_c	dd2coa_c	dd2coa	522	cpd02060_c0	Trans-Dodec-2-enoyl-CoA		C33H53N7O17P3S	-3	cytosol	C03221					According to Big ID database, OK
cpd00347_c0	methf_c	methf_c	methf_c	methf	523	cpd00347_c0	5,10-Methenyltetrahydrofolate		C20H20N7O6	-1	cytosol	C00445					According to Big ID database, OK
cpd00393_c0	fol_c	fol_c	fol_c	fol	524	cpd00393_c0	Folate		C19H17N7O6	-2	cytosol	C00504,D00070					According to Big ID database, OK
cpd00330_c0	dhf_c	dhf_c	dhf_c	dhf	525	cpd00330_c0	7,8-Dihydrofolate		C19H19N7O6	-2	cytosol	C00415					According to Big ID database, OK
cpd01844_c0	ppap_c	ppap_c	ppap_c	ppap	526	cpd01844_c0	Propanoyl phosphate		C3H6O5P	-1	cytosol	C02876					According to Big ID database, OK
cpd11544_c0	cpd11544_c	cpd11544_c	cpd11544_c	cpd11544	527	cpd11544_c0	15-methyl-hexa-decanoyl-ACP		C28H53N2O8PRS	-1	cytosol	None					No Big ID, No KeggID, Using SEED model metabolite description
cpd11543_c0	cpd11543_c	cpd11543_c	cpd11543_c	cpd11543	528	cpd11543_c0	15-methyl-trans-hexa-dec-2-enoyl-ACP		C28H51N2O8PRS	-1	cytosol	None					No Big ID, No KeggID, Using SEED model metabolite description
cpd00355_c0	nmn_c	nmn_c	nmn_c	nmn	529	cpd00355_c0	NMN		C11H15N2O8P	0	cytosol	C00455					According to Big ID database, OK
cpd00213_c0	lpam_c	lpam_c	lpam_c	lpam	530	cpd00213_c0	Lipoamide C8H15NOS2		C8H15NOS2	0	cytosol	C00248,D00048					According to Big ID database, OK
cpd00449_c0	dhlam_c	dhlam_c	dhlam_c	dhlam	531	cpd00449_c0	Dihydrolipoamide C8H17NOS2		C8H17NOS2	0	cytosol	C00579					According to Big ID database, OK
cpd00226_c0	hxan_c	hxan_c	hxan_c	hxan	532	cpd00226_c0	Hypoxanthine		C5H4N4O	0	cytosol	C00262					According to Big ID database, OK
cpd11580_c0	gly_gln__L_c	gly_gln__L_c	gly_gln__L_c	gly_gln-L	533	cpd11580_c0	Gly-Gln		C7H13N3O4	0	cytosol	None					According to Big ID database
cpd00932_c0	3psme_c	3psme_c	3psme_c	3psme	534	cpd00932_c0	5-O-(1-Carboxyvinyl)-3-phosphoshikimate		C10H10O10P	-3	cytosol	C01269					According to Big ID database, OK
cpd03049_c0	2ahethmpp_c	2ahethmpp_c	2ahethmpp_c	2ahethmpp	535	cpd03049_c0	2-Hydroxyethyl-ThPP		C14H21N4O8P2S	-1	cytosol	C05125					According to Big ID database
cpd00498_c0	2ahbut_c	2ahbut_c	2ahbut_c	2ahbut	536	cpd00498_c0	(S)-2-Aceto-2-hydroxybutanoate		C6H9O4	-1	cytosol	C00659,C06006					According to Big ID database, OK
cpd00056_c0	thmpp_c	thmpp_c	thmpp_c	thmpp	537	cpd00056_c0	Thiamine diphosphate		C12H17N4O7P2S	-1	cytosol	C00068					According to Big ID database, OK
cpd00282_c0	dhor__S_c	dhor__S_c	dhor__S_c	dhor__S	538	cpd00282_c0	(S)-Dihydroorotate		C5H5N2O4	-1	cytosol	C00337					According to Big ID database, OK
cpd00247_c0	orot_c	orot_c	orot_c	orot	539	cpd00247_c0	Orotate		C5H3N2O4	-1	cytosol	C00295,D00055					According to Big ID database, OK
cpd08286_c0	2me4p_c	2me4p_c	2me4p_c	2me4p	540	cpd08286_c0	2-C-methyl-D-erythritol 4-phosphate		C5H12O7P	-1	cytosol	C11434					According to Big ID database, OK
cpd11498_c0	cpd11498_c	cpd11498_c	cpd11498_c	cpd11498	541	cpd11498_c0	4-methyl-trans-hex-2-enoyl-ACP		C18H31N2O8PRS	-1	cytosol	None					No Big ID, No KeggID, Using SEED model metabolite description
cpd00070_c0	malcoa_c	malcoa_c	malcoa_c	malcoa	542	cpd00070_c0	Malonyl-CoA		C24H34N7O19P3S	-4	cytosol	C00083					According to Big ID database, OK
cpd11519_c0	cpd11519_c	cpd11519_c	cpd11519_c	cpd11519	543	cpd11519_c0	14-methyl-hexa-decanoyl-ACP		C28H53N2O8PRS	-1	cytosol	None					No Big ID, No KeggID, Using SEED model metabolite description
cpd03471_c0	nicrns_c	nicrns_c	nicrns_c	nicrns	544	cpd03471_c0	Nicotinate D-ribonucleoside		C11H13NO6	0	cytosol	C05841					According to Big ID database, OK
cpd00843_c0	2h3oppan_c	2h3oppan_c	2h3oppan_c	2h3oppan	545	cpd00843_c0	2-Hydroxy-3-oxopropanoate		C3H3O4	-1	cytosol	C01146					According to Big ID database, OK
cpd00223_c0	glyc__R_c	glyc__R_c	glyc__R_c	glyc__R	546	cpd00223_c0	(R)-Glycerate		C3H5O4	-1	cytosol	C00258					According to Big ID database, OK
cpd02016_c0	rnam_c	rnam_c	rnam_c	rnam	547	cpd02016_c0	N Ribosylnicotinamide C11H15N2O5		C11H15N2O5	1	cytosol	C03150					According to Big ID database, OK
cpd11481_c0	3hpalmACP_c	3hpalmACP_c	3hpalmACP_c	3hpalmACP	548	cpd11481_c0	R-3-hydroxypalmitoyl-acyl-carrier protein		C27H51N2O9PRS	-1	cytosol	C04633					According to Big ID database, OK
cpd11485_c0	3opalmACP_c	3opalmACP_c	3opalmACP_c	3opalmACP	549	cpd11485_c0	3-Oxohexadecanoyl-acyl-carrier protein		C27H49N2O9PRS	-1	cytosol	C05762					According to Big ID database, OK
cpd00774_c0	uppg3_c	uppg3_c	uppg3_c	uppg3	550	cpd00774_c0	Uroporphyrinogen III		C40H36N4O16	-8	cytosol	C01051					According to Big ID database, OK
cpd00957_c0	25drapp_c	25drapp_c	25drapp_c	25drapp	551	cpd00957_c0	2,5-Diamino-6-(ribosylamino)-4-(3H)-pyrimidinone 5-phosphate		C9H15N5O8P	-1	cytosol	C01304					According to Big ID database, OK
cpd11470_c0	ocACP_c	ocACP_c	ocACP_c	ocACP	552	cpd11470_c0	Octanoyl-ACP (n-C8:0ACP)		C19H35N2O8PRS	-1	cytosol	C05752					According to Big ID database, OK
cpd03494_c0	uagmda_c	uagmda_c	uagmda_c	uagmda	553	cpd03494_c0	Undecaprenyl-diphospho-N-acetylmuramoyl-L-alanyl-D-glutamyl-meso-2,6-diaminopimeloyl-D-alanyl-D-alanine		C87H139N7O23P2	-4	cytosol	C05897,G10556					According to Big ID database, OK
cpd00064_e0	orn_e	orn_e	orn_e	orn	554	cpd00064_e0	Ornithine		C5H13N2O2	1	extracellular	C00077,C01602,D08302					According to Big ID database, OK
cpd03189_c0	HC01435_c	HC01435_c	HC01435_c	HC01435	555	cpd03189_c0	3-Carboxy-1-hydroxypropyl-ThPP		C16H22N4O10P2S	-2	cytosol	None					According to Big ID database
cpd00588_e0	sbt__D_e	sbt__D_e	sbt__D_e	sbt-D	556	cpd00588_e0	D-Sorbitol		C6H14O6	0	extracellular	C00794,D00096					According to Big ID database, OK
cpd11587_c0	ala_L_gln__L_c	ala_L_gln__L_c	ala_L_gln__L_c	ala_L_gln-L	557	cpd11587_c0	Ala-Gln		C8H15N3O4	0	cytosol	None					According to Big ID database
cpd11587_e0	ala_L_gln__L_e	ala_L_gln__L_e	ala_L_gln__L_e	ala_L_gln-L	558	cpd11587_e0	Ala-Gln		C8H15N3O4	0	extracellular	None					According to Big ID database
cpd02083_c0	cpppg3_c	cpppg3_c	cpppg3_c	cpppg3	559	cpd02083_c0	Coproporphyrinogen III		C36H40N4O8	-4	cytosol	C03263					According to Big ID database, OK
cpd00791_c0	pppg9_c	pppg9_c	pppg9_c	pppg9	560	cpd00791_c0	Protoporphyrinogen IX		C34H38N4O4	-2	cytosol	C01079					According to Big ID database, OK
cpd02345_c0	glu1sa_c	glu1sa_c	glu1sa_c	glu1sa	561	cpd02345_c0	L-Glutamate 1-semialdehyde		C5H9NO3	0	cytosol	C03741					According to Big ID database, OK
cpd00327_c0	stcoa_c	stcoa_c	stcoa_c	stcoa	562	cpd00327_c0	Stearoyl-CoA (n-C18:0CoA)		C39H67N7O17P3S	-3	cytosol	C00412					According to Big ID database, OK
cpd00322_c0	ile__L_c	ile__L_c	ile__L_c	ile-L	563	cpd00322_c0	L-Isoleucine		C6H13NO2	0	cytosol	C00407,D00065					According to Big ID database, OK
cpd00322_e0	ile__L_e	ile__L_e	ile__L_e	ile-L	564	cpd00322_e0	L-Isoleucine		C6H13NO2	0	extracellular	C00407,D00065					According to Big ID database, OK
cpd00311_c0	gsn_c	gsn_c	gsn_c	gsn	565	cpd00311_c0	Guanosine		C10H13N5O5	0	cytosol	C00387					According to Big ID database, OK
cpd00136_c0	4hbz_c	4hbz_c	4hbz_c	4hbz	566	cpd00136_c0	4-Hydroxybenzoate		C7H5O3	-1	cytosol	C00156					According to Big ID database, OK
cpd00842_c0	3hbcoa_c	3hbcoa_c	3hbcoa_c	3hbcoa	567	cpd00842_c0	(S)-3-Hydroxybutanoyl-CoA		C25H39N7O18P3S	-3	cytosol	C01144					According to Big ID database, OK
cpd11466_c0	myrsACP_c	myrsACP_c	myrsACP_c	myrsACP	568	cpd11466_c0	Myristoyl-ACP (n-C14:0ACP)		C25H47N2O8PRS	-1	cytosol	C05761					According to Big ID database, OK
cpd02678_c0	fgam_c	fgam_c	fgam_c	fgam	569	cpd02678_c0	N2-Formyl-N1-(5-phospho-D-ribosyl)glycinamide		C8H14N2O9P	-1	cytosol	C04376					According to Big ID database, OK
cpd00013_e0	nh4_e	nh4_e	nh4_e	nh4	570	cpd00013_e0	Ammonium		H4N	1	extracellular	None					According to Big ID database
cpd11535_c0	cpd11535_c	cpd11535_c	cpd11535_c	cpd11535	571	cpd11535_c0	11-methyl-trans-dodec-2-enoyl-ACP		C24H43N2O8PRS	-1	cytosol	None					No Big ID, No KeggID, Using SEED model metabolite description
cpd00028_c0	pheme_c	pheme_c	pheme_c	pheme	572	cpd00028_c0	Protoheme		C34H30FeN4O4	-2	cytosol	C00032					According to Big ID database, OK
cpd01080_e0	ocdca_e	ocdca_e	ocdca_e	ocdca	573	cpd01080_e0	Octadecanoate (n-C18:0)		C18H35O2	-1	extracellular	C01530,D00119					According to Big ID database, OK
cpd02030_c0	skm5p_c	skm5p_c	skm5p_c	skm5p	574	cpd02030_c0	Shikimate 5-phosphate		C7H9O8P	-2	cytosol	C03175					According to Big ID database, OK
cpd11475_c0	tdec2eACP_c	tdec2eACP_c	tdec2eACP_c	tdec2eACP	575	cpd11475_c0	Trans-Dec-2-enoyl-acyl-carrier protein		C21H37N2O8PRS	-1	cytosol	C05754					According to Big ID database, OK
cpd11482_c0	3hdecACP_c	3hdecACP_c	3hdecACP_c	3hdecACP	576	cpd11482_c0	(R)-3-Hydroxydecanoyl-acyl-carrier protein		C21H39N2O9PRS	-1	cytosol	C04619					According to Big ID database, OK
cpd15423_c0	cdpdtdecg_c	cdpdtdecg_c	cdpdtdecg_c	cdpdtdecg	577	cpd15423_c0	CDP-1,2-ditetradecanoylglycerol		C40H71N3O15P2	-2	cytosol	None					According to Big ID database		cdpdtdecg_c
cpd00836_c0	adhlam_c	adhlam_c	adhlam_c	adhlam	578	cpd00836_c0	S-Acetyldihydrolipoamide		C10H19NO2S2	0	cytosol	C01136					According to Big ID database, OK
cpd00137_c0	cit_c	cit_c	cit_c	cit	579	cpd00137_c0	Citrate		C6H5O7	-3	cytosol	C00158,D00037					According to Big ID database, OK
cpd00296_c0	dgmp_c	dgmp_c	dgmp_c	dgmp	580	cpd00296_c0	DGMP		C10H13N5O7P	-1	cytosol	C00362					According to Big ID database, OK
cpd00068_c0	itp_c	itp_c	itp_c	itp	581	cpd00068_c0	ITP		C10H12N4O14P3	-3	cytosol	C00081					According to Big ID database, OK
cpd00090_c0	idp_c	idp_c	idp_c	idp	582	cpd00090_c0	IDP		C10H12N4O11P2	-2	cytosol	C00104					According to Big ID database, OK
cpd15690_c0	cpd15690_c	cpd15690_c	cpd15690_c	cpd15690	583	cpd15690_c0	Dianteisoheptadecanoylphosphatidylserine		C40H76NO10P	-2	cytosol	None					No Big ID, No KeggID, Using SEED model metabolite description
cpd15547_c0	pgp180_c	pgp180_c	pgp180_c	pgp180	584	cpd15547_c0	Phosphatidylglycerophosphate dioctadecanoyl		C42H82O13P2	-2	cytosol	None					According to Big ID database
cpd15605_c0	gly_phe__L_c	gly_phe__L_c	gly_phe__L_c	gly_phe-L	585	cpd15605_c0	Gly-Phe		C11H14N2O3	0	cytosol	None					According to Big ID database
cpd00654_c0	dcyt_c	dcyt_c	dcyt_c	dcyt	586	cpd00654_c0	Deoxycytidine		C9H13N3O4	0	cytosol	C00881,D06196					According to Big ID database, OK
cpd00107_e0	leu__L_e	leu__L_e	leu__L_e	leu-L	587	cpd00107_e0	L-Leucine		C6H13NO2	0	extracellular	C00123,D00030					According to Big ID database, OK
cpd00044_c0	paps_c	paps_c	paps_c	paps	588	cpd00044_c0	3-Phosphoadenylyl sulfate		C10H12N5O13P2S	-3	cytosol	C00053					According to Big ID database, OK
cpd00226_e0	hxan_e	hxan_e	hxan_e	hxan	589	cpd00226_e0	Hypoxanthine		C5H4N4O	0	extracellular	C00262					According to Big ID database, OK
cpd15696_c0	cpd15696_c	cpd15696_c	cpd15696_c	cpd15696	590	cpd15696_c0	Dianteisoheptadecanoylphosphatidylethanolamine		C39H78NO8P	0	cytosol	None					No Big ID, No KeggID, Using SEED model metabolite description
cpd15352_c0	2dmmq8_c	2dmmq8_c	2dmmq8_c	2dmmq8	591	cpd15352_c0	2-Demethylmenaquinone 8		C50H70O2	0	cytosol	None					According to Big ID database		2dmmq8_c
cpd15353_c0	2dmmql8_c	2dmmql8_c	2dmmql8_c	2dmmql8	592	cpd15353_c0	2-Demethylmenaquinol 8		C50H72O2	0	cytosol	None					According to Big ID database		2dmmql8_c
cpd01710_c0	2ippm_c	2ippm_c	2ippm_c	2ippm	593	cpd01710_c0	2-Isopropylmaleate		C7H8O4	-2	cytosol	C02631					According to Big ID database, OK
cpd11520_c0	cpd11520_c	cpd11520_c	cpd11520_c	cpd11520	594	cpd11520_c0	isovaleryl-ACP		C16H29N2O8PRS	-1	cytosol	None					No Big ID, No KeggID, Using SEED model metabolite description
cpd02147_c0	4per_c	4per_c	4per_c	4per	595	cpd02147_c0	4-Phospho-D-erythronate		C4H7O8P	-2	cytosol	C03393					According to Big ID database, OK
cpd02375_c0	dcamp_c	dcamp_c	dcamp_c	dcamp	596	cpd02375_c0	N6-(1,2-Dicarboxyethyl)-AMP		C14H15N5O11P	-3	cytosol	C03794					According to Big ID database, OK
cpd00349_c0	s17bp_c	s17bp_c	s17bp_c	s17bp	597	cpd00349_c0	Sedoheptulose 1,7-bisphosphate		C7H14O13P2	-2	cytosol	C00447					According to Big ID database, OK
cpd11531_c0	cpd11531_c	cpd11531_c	cpd11531_c	cpd11531	598	cpd11531_c0	9-methyl-trans-dec-2-enoyl-ACP		C22H39N2O8PRS	-1	cytosol	None					No Big ID, No KeggID, Using SEED model metabolite description
cpd03847_c0	ttdca_c	ttdca_c	ttdca_c	ttdca	599	cpd03847_c0	Tetradecanoate (n-C14:0)		C14H27O2	-1	cytosol	C06424					According to Big ID database, OK
cpd00108_e0	gal_e	gal_e	gal_e	gal	600	cpd00108_e0	D-Galactose		C6H12O6	0	extracellular	C00124					According to Big ID database, OK
cpd00054_e0	ser__L_e	ser__L_e	ser__L_e	ser-L	601	cpd00054_e0	L-Serine		C3H7NO3	0	extracellular	C00065,D00016					According to Big ID database, OK
cpd11501_c0	cpd11501_c	cpd11501_c	cpd11501_c	cpd11501	602	cpd11501_c0	6-methyl-3-hydroxy-octanoyl-ACP		C20H37N2O9PRS	-1	cytosol	None					No Big ID, No KeggID, Using SEED model metabolite description
cpd01324_c0	cpd01324_c	cpd01324_c	cpd01324_c	cpd01324	603	cpd01324_c0	L-Histidinal		C6H10N3O	1	cytosol	None					No Big ID, No KeggID, Using SEED model metabolite description
cpd00116_c0	meoh_c	meoh_c	meoh_c	meoh	604	cpd00116_c0	Methanol		CH4O	0	cytosol	C00132,D02309					According to Big ID database, OK
cpd00478_c0	pdx5p_c	pdx5p_c	pdx5p_c	pdx5p	605	cpd00478_c0	Pyridoxine 5-phosphate		C8H11NO6P	-1	cytosol	C00627					According to Big ID database, OK
cpd03423_c0	rdmbzi_c	rdmbzi_c	rdmbzi_c	rdmbzi	606	cpd03423_c0	N1-(alpha-D-ribosyl)-5,6-dimethylbenzimidazole		C14H18N2O4	0	cytosol	C05775					According to Big ID database, OK
cpd02068_c0	3mgcoa_c	3mgcoa_c	3mgcoa_c	3mgcoa	607	cpd02068_c0	3-Methylglutaconyl-CoA		C27H38N7O19P3S	-4	cytosol	C03231					According to Big ID database, OK
cpd03121_c0	3oocoa_c	3oocoa_c	3oocoa_c	3oocoa	608	cpd03121_c0	3-Oxooctanoyl-CoA		C29H45N7O18P3S	-3	cytosol	C05267					According to Big ID database, OK
cpd03124_c0	hxcoa_c	hxcoa_c	hxcoa_c	hxcoa	609	cpd03124_c0	Hexanoyl-CoA (n-C6:0CoA)		C27H43N7O17P3S	-3	cytosol	C05270					According to Big ID database, OK
cpd02920_c0	6hmhptpp_c	6hmhptpp_c	6hmhptpp_c	6hmhptpp	610	cpd02920_c0	6-hydroxymethyl-dihydropterin pyrophosphate		C7H9N5O8P2	-2	cytosol	C04807					According to Big ID database, OK
cpd10515_e0	fe2_e	fe2_e	fe2_e	fe2	611	cpd10515_e0	Fe2+		Fe	2	extracellular	C14818					According to Big ID database, OK
cpd11538_c0	cpd11538_c	cpd11538_c	cpd11538_c	cpd11538	612	cpd11538_c0	13-methyl-3-hydroxy-tetra-decanoyl-ACP		C26H49N2O9PRS	-1	cytosol	None					No Big ID, No KeggID, Using SEED model metabolite description
cpd10516_c0	fe3_c	fe3_c	fe3_c	fe3	613	cpd10516_c0	Fe3+		Fe	3	cytosol	C14819					According to Big ID database, OK
cpd00026_c0	udpg_c	udpg_c	udpg_c	udpg	614	cpd00026_c0	UDPglucose		C15H22N2O17P2	-2	cytosol	C00029,G10608					According to Big ID database, OK
cpd08928_c0	thrp_c	thrp_c	thrp_c	thrp	615	cpd08928_c0	L-Threonine O-3-phosphate		C4H9NO6P	-1	cytosol	C12147					According to Big ID database, OK
cpd11474_c0	dcaACP_c	dcaACP_c	dcaACP_c	dcaACP	616	cpd11474_c0	Decanoyl-ACP (n-C10:0ACP)		C21H39N2O8PRS	-1	cytosol	C05755					According to Big ID database, OK
cpd00738_c0	pser__L_c	pser__L_c	pser__L_c	pser-L	617	cpd00738_c0	O-Phospho-L-serine		C3H7NO6P	-1	cytosol	C01005					According to Big ID database, OK
cpd03914_c0	co2dam_c	co2dam_c	co2dam_c	co2dam	618	cpd03914_c0	Cob(II)yrinate a,c diamide		C45H57CoN6O12	-3	cytosol	C06504					According to Big ID database, OK
cpd00367_e0	cytd_e	cytd_e	cytd_e	cytd	619	cpd00367_e0	Cytidine		C9H13N3O5	0	extracellular	C00475,C02961,D00168,D07769					According to Big ID database, OK
cpd14961_c0	codscl7_c	codscl7_c	codscl7_c	codscl7	620	cpd14961_c0	Cobalt-precorrin-7		C45H50CoN4O16	-6	cytosol	C16244					According to Big ID database, OK
cpd08373_c0	codhpre6_c	codhpre6_c	codhpre6_c	codhpre6	621	cpd08373_c0	Cobalt-dihydro-precorrin 6		C44H48CoN4O16	-6	cytosol	C11543					According to Big ID database, OK
cpd00277_e0	dgsn_e	dgsn_e	dgsn_e	dgsn	622	cpd00277_e0	Deoxyguanosine		C10H13N5O4	0	extracellular	C00330					According to Big ID database, OK
cpd11506_c0	cpd11506_c	cpd11506_c	cpd11506_c	cpd11506	623	cpd11506_c0	8-methyl-trans-dec-2-enoyl-ACP		C22H39N2O8PRS	-1	cytosol	None					No Big ID, No KeggID, Using SEED model metabolite description
cpd00229_c0	gcald_c	gcald_c	gcald_c	gcald	624	cpd00229_c0	Glycolaldehyde		C2H4O2	0	cytosol	C00266					According to Big ID database, OK
cpd02961_c0	dhnpt_c	dhnpt_c	dhnpt_c	dhnpt	625	cpd02961_c0	Dihydroneopterin		C9H13N5O4	0	cytosol	C04874					According to Big ID database, OK
cpd00099_c0	cl_c	cl_c	cl_c	cl	626	cpd00099_c0	Chloride		Cl	-1	cytosol	C00698,C01327,D02057					According to Big ID database, OK
cpd00099_e0	cl_e	cl_e	cl_e	cl	627	cpd00099_e0	Chloride		Cl	-1	extracellular	C00698,C01327,D02057					According to Big ID database, OK
cpd11592_c0	gly_glu__L_c	gly_glu__L_c	gly_glu__L_c	gly_glu-L	628	cpd11592_c0	gly-glu-L		C7H11N2O5	-1	cytosol	None					According to Big ID database
cpd11592_e0	gly_glu__L_e	gly_glu__L_e	gly_glu__L_e	gly_glu-L	629	cpd11592_e0	gly-glu-L		C7H11N2O5	-1	extracellular	None					According to Big ID database
cpd08316_c0	gmhep17bp_c	gmhep17bp_c	gmhep17bp_c	gmhep17bp	630	cpd08316_c0	D-Glycero-D-manno-heptose1-7-bisphosphate		C7H14O13P2	-2	cytosol	None					According to Big ID database
cpd04918_c0	gmhep7p_c	gmhep7p_c	gmhep7p_c	gmhep7p	631	cpd04918_c0	D-Glycero-D-manno-heptose 7-phosphate		C7H14O10P	-1	cytosol	C07836,C19882					According to Big ID database, OK
cpd00712_c0	2dhp_c	2dhp_c	2dhp_c	2dhp	632	cpd00712_c0	2-Dehydropantoate		C6H9O4	-1	cytosol	C00966					According to Big ID database, OK
cpd00030_c0	mn2_c	mn2_c	mn2_c	mn2	633	cpd00030_c0	Mn2+		Mn	2	cytosol	C00034,C19610					According to Big ID database, OK
cpd00030_e0	mn2_e	mn2_e	mn2_e	mn2	634	cpd00030_e0	Mn2+		Mn	2	extracellular	C00034,C19610					According to Big ID database, OK
cpd11507_c0	cpd11507_c	cpd11507_c	cpd11507_c	cpd11507	635	cpd11507_c0	8-methyl-decanoyl-ACP		C22H41N2O8PRS	-1	cytosol	None					No Big ID, No KeggID, Using SEED model metabolite description
cpd00047_e0	for_e	for_e	for_e	for	636	cpd00047_e0	Formate		CHO2	-1	extracellular	C00058					According to Big ID database, OK
cpd00797_c0	bhb_c	bhb_c	bhb_c	bhb	637	cpd00797_c0	(R)-3-Hydroxybutanoate		C4H7O3	-1	cytosol	C01089					According to Big ID database, OK
cpd11497_c0	cpd11497_c	cpd11497_c	cpd11497_c	cpd11497	638	cpd11497_c0	4-methyl-3-hydroxy-hexanoyl-ACP		C18H33N2O9PRS	-1	cytosol	None					No Big ID, No KeggID, Using SEED model metabolite description
cpd15695_c0	cpd15695_c	cpd15695_c	cpd15695_c	cpd15695	639	cpd15695_c0	Diisoheptadecanoylphosphatidylethanolamine		C39H78NO8P	0	cytosol	None					No Big ID, No KeggID, Using SEED model metabolite description
cpd15689_c0	cpd15689_c	cpd15689_c	cpd15689_c	cpd15689	640	cpd15689_c0	Diisoheptadecanoylphosphatidylserine		C40H76NO10P	-2	cytosol	None					No Big ID, No KeggID, Using SEED model metabolite description
cpd08370_c0	copre4_c	copre4_c	copre4_c	copre4	641	cpd08370_c0	Cobalt-precorrin 4		C44H44CoN4O16	-6	cytosol	C11540					According to Big ID database, OK
cpd12848_c0	btnCCP_c	btnCCP_c	btnCCP_c	btnCCP	642	cpd12848_c0	Holo-[carboxylase]		C17H27N5O4R2S	0	cytosol	C06250					According to Big ID database
cpd12543_c0	cbtnCCP_c	cbtnCCP_c	cbtnCCP_c	cbtnCCP	643	cpd12543_c0	Carboxybiotin-carboxyl-carrier protein		C18H26N5O6R2S	-1	cytosol	C04419					According to Big ID database
cpd01982_c0	pram_c	pram_c	pram_c	pram	644	cpd01982_c0	5-Phospho-beta-D-ribosylamine		C5H12NO7P	0	cytosol	C03090					According to Big ID database, OK
cpd00276_e0	gam_e	gam_e	gam_e	gam	645	cpd00276_e0	D-Glucosamine		C6H14NO5	1	extracellular	C00329,D04334					According to Big ID database, OK
cpd00755_c0	hmbil_c	hmbil_c	hmbil_c	hmbil	646	cpd00755_c0	Hydroxymethylbilane		C40H38N4O17	-8	cytosol	C01024					According to Big ID database, OK
cpd15533_c0	pe180_c	pe180_c	pe180_c	pe180	647	cpd15533_c0	phosphatidylethanolamine dioctadecanoyl		C41H82NO8P	0	cytosol	None					According to Big ID database
cpd03114_c0	3ohdcoa_c	3ohdcoa_c	3ohdcoa_c	3ohdcoa	648	cpd03114_c0	3-Oxohexadecanoyl-CoA		C37H61N7O18P3S	-3	cytosol	C05259					According to Big ID database, OK
cpd03113_c0	3hhdcoa_c	3hhdcoa_c	3hhdcoa_c	3hhdcoa	649	cpd03113_c0	(S)-3-Hydroxyhexadecanoyl-CoA		C37H63N7O18P3S	-3	cytosol	C05258					According to Big ID database, OK
cpd02843_c0	eig3p_c	eig3p_c	eig3p_c	eig3p	650	cpd02843_c0	D-erythro-1-(Imidazol-4-yl)glycerol 3-phosphate		C6H10N2O6P	-1	cytosol	C04666					According to Big ID database, OK
cpd00497_c0	xmp_c	xmp_c	xmp_c	xmp	651	cpd00497_c0	Xanthosine 5-phosphate		C10H12N4O9P	-1	cytosol	C00655					According to Big ID database, OK
cpd11225_c0	db4p_c	db4p_c	db4p_c	db4p	652	cpd11225_c0	3,4-dihydroxy-2-butanone 4-phosphate		C4H8O6P	-1	cytosol	C15556					According to Big ID database, OK
cpd00249_e0	uri_e	uri_e	uri_e	uri	653	cpd00249_e0	Uridine		C9H12N2O6	0	extracellular	C00299,C16745					According to Big ID database, OK
cpd00378_c0	frmd_c	frmd_c	frmd_c	frmd	654	cpd00378_c0	Formamide		CH3NO	0	cytosol	C00488					According to Big ID database, OK
cpd00012_e0	ppi_e	ppi_e	ppi_e	ppi	655	cpd00012_e0	Diphosphate		H2O7P2	-2	extracellular	C00013					According to Big ID database, OK
cpd03120_c0	3hocoa_c	3hocoa_c	3hocoa_c	3hocoa	656	cpd03120_c0	(S)-3-Hydroxyoctanoyl-CoA		C29H47N7O18P3S	-3	cytosol	C05266					According to Big ID database, OK
cpd03117_c0	3oddcoa_c	3oddcoa_c	3oddcoa_c	3oddcoa	657	cpd03117_c0	3-Oxododecanoyl-CoA		C33H53N7O18P3S	-3	cytosol	C05263					According to Big ID database, OK
cpd15489_c0	icolipa_c	icolipa_c	icolipa_c	icolipa	658	cpd15489_c0	inner core oligosaccharide lipid A (heptosyl2kdo2 lipid A)		C145H255N2O74P4	-7	cytosol	None					According to Big ID database
cpd15479_c0	gicolipa_c	gicolipa_c	gicolipa_c	gicolipa	659	cpd15479_c0	glucosyl-inner core oligosaccharide lipid A		C151H265N2O79P4	-7	cytosol	None					According to Big ID database		gicolipa_c
cpd11494_c0	acACP_c	acACP_c	acACP_c	acACP	660	cpd11494_c0	Acetyl-ACP		C13H23N2O8PRS	-1	cytosol	C03939					According to Big ID database, OK
cpd00082_c0	fru_c	fru_c	fru_c	fru	661	cpd00082_c0	D-Fructose		C6H12O6	0	cytosol	C00095,C01496,C10906,D00114					According to Big ID database, OK
cpd00293_c0	acgam6p_c	acgam6p_c	acgam6p_c	acgam6p	662	cpd00293_c0	N-Acetyl-D-glucosamine 6-phosphate		C8H15NO9P	-1	cytosol	C00357					According to Big ID database, OK
cpd00184_e0	thymd_e	thymd_e	thymd_e	thymd	663	cpd00184_e0	Thymidine		C10H14N2O5	0	extracellular	C00214,D06675					According to Big ID database, OK
cpd00477_c0	acglu_c	acglu_c	acglu_c	acglu	664	cpd00477_c0	N-Acetyl-L-glutamate		C7H9NO5	-2	cytosol	C00624					According to Big ID database, OK
cpd03443_c0	3ophb_c	3ophb_c	3ophb_c	3ophb	665	cpd03443_c0	3-Octaprenyl-4-hydroxybenzoate		C47H69O3	-1	cytosol	C05809					According to Big ID database, OK
cpd03444_c0	2oph_c	2oph_c	2oph_c	2oph	666	cpd03444_c0	2-Octaprenylphenol		C46H70O	0	cytosol	C05810					According to Big ID database, OK
cpd11524_c0	cpd11524_c	cpd11524_c	cpd11524_c	cpd11524	667	cpd11524_c0	5-methyl-hexanoyl-ACP		C18H33N2O8PRS	-1	cytosol	None					No Big ID, No KeggID, Using SEED model metabolite description
cpd11525_c0	cpd11525_c	cpd11525_c	cpd11525_c	cpd11525	668	cpd11525_c0	7-methyl-3-oxo-octanoyl-ACP		C20H35N2O9PRS	-1	cytosol	None					No Big ID, No KeggID, Using SEED model metabolite description
cpd00581_c0	urcan_c	urcan_c	urcan_c	urcan	669	cpd00581_c0	Urocanate		C6H5N2O2	-1	cytosol	C00785					According to Big ID database, OK
cpd00383_c0	skm_c	skm_c	skm_c	skm	670	cpd00383_c0	Shikimate		C7H9O5	-1	cytosol	C00493					According to Big ID database, OK
cpd11542_c0	cpd11542_c	cpd11542_c	cpd11542_c	cpd11542	671	cpd11542_c0	15-methyl-3-hydroxy-hexa-decanoyl-ACP		C28H53N2O9PRS	-1	cytosol	None					No Big ID, No KeggID, Using SEED model metabolite description
cpd03897_c0	cpd03897_c	cpd03897_c	cpd03897_c	cpd03897	672	cpd03897_c0	4a-Hydroxytetrahydrobiopterin		C9H15N5O4	0	cytosol	None					No Big ID, No KeggID, Using SEED model metabolite description
cpd11912_c0	trnaglu_c	trnaglu_c	trnaglu_c	trnaglu	673	cpd11912_c0	TRNA (Glu)		C10H12N5O3R	0	cytosol	C01641					According to Big ID database, OK
cpd12227_c0	glutrna_c	glutrna_c	glutrna_c	glutrna	674	cpd12227_c0	L-Glutamyl-tRNA(Glu)		C15H19N6O6R	0	cytosol	C02987					According to Big ID database, OK
cpd11580_e0	gly_gln__L_e	gly_gln__L_e	gly_gln__L_e	gly_gln-L	675	cpd11580_e0	Gly-Gln		C7H13N3O4	0	extracellular	None					According to Big ID database
cpd11621_c0	fdxox_c	fdxox_c	fdxox_c	fdxox	676	cpd11621_c0	Oxidizedferredoxin		Fe2R4S6	6	cytosol	None					According to Big ID database
cpd11620_c0	fdxrd_c	fdxrd_c	fdxrd_c	fdxrd	677	cpd11620_c0	Reduced ferredoxin		Fe2R4S6	4	cytosol	C00138					According to Big ID database, OK
cpd00139_c0	glyclt_c	glyclt_c	glyclt_c	glyclt	678	cpd00139_c0	Glycolate		C2H3O3	-1	cytosol	C00160					According to Big ID database, OK
cpd03606_c0	ohpb_c	ohpb_c	ohpb_c	ohpb	679	cpd03606_c0	2-Oxo-3-hydroxy-4-phosphobutanoate		C4H5O8P	-2	cytosol	C06054					According to Big ID database, OK
cpd11581_e0	gly_asn__L_e	gly_asn__L_e	gly_asn__L_e	gly_asn-L	680	cpd11581_e0	gly-asn-L		C6H11N3O4	0	extracellular	None					According to Big ID database
cpd02642_c0	pran_c	pran_c	pran_c	pran	681	cpd02642_c0	N-(5-Phospho-D-ribosyl)anthranilate		C12H14NO9P	-2	cytosol	C04302					According to Big ID database, OK
cpd01012_e0	cd2_e	cd2_e	cd2_e	cd2	682	cpd01012_e0	Cadmium		Cd	2	extracellular	C01413					According to Big ID database, OK
cpd01012_c0	cd2_c	cd2_c	cd2_c	cd2	683	cpd01012_c0	Cadmium		Cd	2	cytosol	C01413					According to Big ID database, OK
cpd11488_c0	actACP_c	actACP_c	actACP_c	actACP	684	cpd11488_c0	Acetoacetyl-ACP		C15H25N2O9PRS	-1	cytosol	C05744					According to Big ID database, OK
cpd01476_c0	ppp9_c	ppp9_c	ppp9_c	ppp9	685	cpd01476_c0	Protoporphyrin		C34H32N4O4	-2	cytosol	C02191					According to Big ID database, OK
cpd00918_c0	acg5sa_c	acg5sa_c	acg5sa_c	acg5sa	686	cpd00918_c0	N-Acetyl-L-glutamate 5-semialdehyde		C7H10NO4	-1	cytosol	C01250					According to Big ID database, OK
cpd02552_c0	acg5p_c	acg5p_c	acg5p_c	acg5p	687	cpd02552_c0	N-Acetyl-L-glutamyl 5-phosphate		C7H10NO8P	-2	cytosol	C04133					According to Big ID database, OK
cpd15485_c0	hlipa_c	hlipa_c	hlipa_c	hlipa	688	cpd15485_c0	heptosyl-kdo2-lipidA		C117H210N2O45P2	-4	cytosol	None					According to Big ID database		hlipa_c
cpd15484_c0	hhlipa_c	hhlipa_c	hhlipa_c	hhlipa	689	cpd15484_c0	heptosyl-heptosyl-kdo2-lipidA		C124H222N2O51P2	-4	cytosol	None					According to Big ID database		hhlipa_c
cpd03833_c0	pre3b_c	pre3b_c	pre3b_c	pre3b	690	cpd03833_c0	Precorrin 3B		C43H44N4O17	-6	cytosol	C06406					According to Big ID database, OK
cpd03422_c0	cbi_c	cbi_c	cbi_c	cbi	691	cpd03422_c0	Cobinamide		C48H73CoN11O8	1	cytosol	C05774					According to Big ID database, OK
cpd00159_e0	lac__L_e	lac__L_e	lac__L_e	lac-L	692	cpd00159_e0	L-Lactate		C3H5O3	-1	extracellular	C00186					According to Big ID database, OK
cpd11537_c0	cpd11537_c	cpd11537_c	cpd11537_c	cpd11537	693	cpd11537_c0	13-methyl-3-oxo-tetra-decanoyl-ACP		C26H47N2O9PRS	-1	cytosol	None					No Big ID, No KeggID, Using SEED model metabolite description
cpd01914_c0	metsox_S__L_c	metsox_S__L_c	metsox_S__L_c	metsox_S-L	694	cpd01914_c0	L-Methionine S-oxide		C5H11NO3S	0	cytosol	C02989,C15998,C15999					According to Big ID database
cpd01914_e0	metsox_S__L_e	metsox_S__L_e	metsox_S__L_e	metsox_S-L	695	cpd01914_e0	L-Methionine S-oxide		C5H11NO3S	0	extracellular	C02989,C15998,C15999					According to Big ID database
cpd03916_c0	adcobdam_c	adcobdam_c	adcobdam_c	adcobdam	696	cpd03916_c0	Adenosyl cobyrinate diamide		C55H69CoN11O15	-3	cytosol	C06506					According to Big ID database, OK
cpd03915_c0	co1dam_c	co1dam_c	co1dam_c	co1dam	697	cpd03915_c0	Cob(I)yrinate a,c diamide		C45H57CoN6O12	-4	cytosol	C06505					According to Big ID database, OK
cpd03122_c0	3hhcoa_c	3hhcoa_c	3hhcoa_c	3hhcoa	698	cpd03122_c0	(S)-3-Hydroxyhexanoyl-CoA		C27H43N7O18P3S	-3	cytosol	C05268					According to Big ID database, OK
cpd03125_c0	hx2coa_c	hx2coa_c	hx2coa_c	hx2coa	699	cpd03125_c0	Trans-Hex-2-enoyl-CoA		C27H41N7O17P3S	-3	cytosol	C05271					According to Big ID database, OK
cpd11487_c0	3odecACP_c	3odecACP_c	3odecACP_c	3odecACP	700	cpd11487_c0	3-Oxodecanoyl-acyl-carrier protein		C21H37N2O9PRS	-1	cytosol	C05753					According to Big ID database, OK
cpd11536_c0	cpd11536_c	cpd11536_c	cpd11536_c	cpd11536	701	cpd11536_c0	11-methyl-dodecanoyl-ACP		C24H45N2O8PRS	-1	cytosol	None					No Big ID, No KeggID, Using SEED model metabolite description
cpd02211_c0	2aobut_c	2aobut_c	2aobut_c	2aobut	702	cpd02211_c0	L-2-Amino-3-oxobutanoate		C4H7NO3	0	cytosol	C03214,C03508					According to Big ID database, OK
cpd01977_c0	4pasp_c	4pasp_c	4pasp_c	4pasp	703	cpd01977_c0	4-Phospho-L-aspartate		C4H7NO7P	-1	cytosol	C03082					According to Big ID database, OK
cpd00283_c0	grdp_c	grdp_c	grdp_c	grdp	704	cpd00283_c0	Geranyl diphosphate		C10H18O7P2	-2	cytosol	C00341					According to Big ID database, OK
cpd00760_c0	2mbcoa_c	2mbcoa_c	2mbcoa_c	2mbcoa	705	cpd00760_c0	2-Methylbutanoyl-CoA		C26H41N7O17P3S	-3	cytosol	C01033,C15980					According to Big ID database, OK
cpd00214_e0	hdca_e	hdca_e	hdca_e	hdca	706	cpd00214_e0	Hexadecanoate (n-C16:0)		C16H31O2	-1	extracellular	C00249,D05341					According to Big ID database, OK
cpd11585_e0	L_alagly_e	L_alagly_e	L_alagly_e	L_alagly	707	cpd11585_e0	L-alanylglycine		C5H10N2O3	0	extracellular	None					According to Big ID database
cpd02993_c0	lipidA_c	lipidA_c	lipidA_c	lipidA	708	cpd02993_c0	2,3,23-Tetrakis(beta-hydroxymyristoyl)-D-glucosaminyl-1,6-beta-D-glucosamine 1,4-bisphosphate		C68H128N2O23P2	-2	cytosol	C04919					According to Big ID database, OK
cpd00122_e0	acgam_e	acgam_e	acgam_e	acgam	709	cpd00122_e0	N-Acetyl-D-glucosamine		C8H15NO6	0	extracellular	C00140					According to Big ID database, OK
cpd08449_c0	cpd08449_c	cpd08449_c	cpd08449_c	cpd08449	710	cpd08449_c0	3-Amino-2-oxopropyl phosphate		C3H8NO5P	0	cytosol	None					No Big ID, No KeggID, Using SEED model metabolite description
cpd00412_e0	duri_e	duri_e	duri_e	duri	711	cpd00412_e0	Deoxyuridine		C9H12N2O5	0	extracellular	C00526					According to Big ID database, OK
cpd02394_c0	gar_c	gar_c	gar_c	gar	712	cpd02394_c0	N1-(5-Phospho-D-ribosyl)glycinamide		C7H15N2O8P	0	cytosol	C03838					According to Big ID database, OK
cpd03913_c0	hgbam_c	hgbam_c	hgbam_c	hgbam	713	cpd03913_c0	Hydrogenobyrinate a,c diamide		C45H58N6O12	-4	cytosol	C06503					According to Big ID database, OK
cpd03832_c0	hgbyr_c	hgbyr_c	hgbyr_c	hgbyr	714	cpd03832_c0	Hydrogenobyrinate		C45H54N4O14	-6	cytosol	C06399					According to Big ID database, OK
cpd00635_e0	cbl1_e	cbl1_e	cbl1_e	cbl1	715	cpd00635_e0	Cob(I)alamin		C62H89CoN13O14P	0	extracellular	C00853					According to Big ID database, OK
cpd00305_c0	thm_c	thm_c	thm_c	thm	716	cpd00305_c0	Thiamin		C12H17N4OS	1	cytosol	C00378					According to Big ID database, OK
cpd00305_e0	thm_e	thm_e	thm_e	thm	717	cpd00305_e0	Thiamin		C12H17N4OS	1	extracellular	C00378					According to Big ID database, OK
cpd11588_c0	gly_pro__L_c	gly_pro__L_c	gly_pro__L_c	gly_pro-L	718	cpd11588_c0	gly-pro-L		C7H12N2O3	0	cytosol	None					According to Big ID database
cpd01270_c0	fmnh2_c	fmnh2_c	fmnh2_c	fmnh2	719	cpd01270_c0	Reduced FMN		C17H22N4O9P	-1	cytosol	C01847					According to Big ID database, OK
cpd00209_e0	no3_e	no3_e	no3_e	no3	720	cpd00209_e0	Nitrate		NO3	-1	extracellular	C00244,D02313					According to Big ID database, OK
cpd11591_c0	gly_met__L_c	gly_met__L_c	gly_met__L_c	gly_met-L	721	cpd11591_c0	Gly-Met		C7H14N2O3S	0	cytosol	None					According to Big ID database
cpd11591_e0	gly_met__L_e	gly_met__L_e	gly_met__L_e	gly_met-L	722	cpd11591_e0	Gly-Met		C7H14N2O3S	0	extracellular	None					According to Big ID database
cpd03123_c0	3ohcoa_c	3ohcoa_c	3ohcoa_c	3ohcoa	723	cpd03123_c0	3-Oxohexanoyl-CoA		C27H41N7O18P3S	-3	cytosol	C05269					According to Big ID database, OK
cpd00092_e0	ura_e	ura_e	ura_e	ura	724	cpd00092_e0	Uracil		C4H4N2O2	0	extracellular	C00106,D00027,D09776					According to Big ID database, OK
cpd12225_c0	dhlpro_c	dhlpro_c	dhlpro_c	dhlpro	725	cpd12225_c0	Dihydrolipolprotein H2S2X		CH3RS2	0	cytosol	C02972					According to Big ID database, OK
cpd00522_c0	dtdp4d6dm_c	dtdp4d6dm_c	dtdp4d6dm_c	dtdp4d6dm	726	cpd00522_c0	DTDP-4-dehydro-6-deoxy-L-mannose		C16H22N2O15P2	-2	cytosol	C00688					According to Big ID database, OK
cpd02125_c0	2mb2coa_c	2mb2coa_c	2mb2coa_c	2mb2coa	727	cpd02125_c0	Trans-2-Methylbut-2-enoyl-CoA		C26H39N7O17P3S	-3	cytosol	C03345					According to Big ID database, OK
cpd00051_e0	arg__L_e	arg__L_e	arg__L_e	arg-L	728	cpd00051_e0	L-Arginine		C6H15N4O2	1	extracellular	C00062,D02982					According to Big ID database, OK
cpd03126_c0	hdd2coa_c	hdd2coa_c	hdd2coa_c	hdd2coa	729	cpd03126_c0	Trans-Hexadec-2-enoyl-CoA		C37H61N7O17P3S	-3	cytosol	C05272					According to Big ID database, OK
cpd11526_c0	cpd11526_c	cpd11526_c	cpd11526_c	cpd11526	730	cpd11526_c0	7-methyl-3-hydroxy-octanoyl-ACP		C20H37N2O9PRS	-1	cytosol	None					No Big ID, No KeggID, Using SEED model metabolite description
cpd00058_c0	cu2_c	cu2_c	cu2_c	cu2	731	cpd00058_c0	Cu2+		Cu	2	cytosol	C00070					According to Big ID database, OK
cpd00058_e0	cu2_e	cu2_e	cu2_e	cu2	732	cpd00058_e0	Cu2+		Cu	2	extracellular	C00070					According to Big ID database, OK
cpd11541_c0	cpd11541_c	cpd11541_c	cpd11541_c	cpd11541	733	cpd11541_c0	15-methyl-3-oxo-hexa-decanoyl-ACP		C28H51N2O9PRS	-1	cytosol	None					No Big ID, No KeggID, Using SEED model metabolite description
cpd04539_c0	cpd04539_c	cpd04539_c	cpd04539_c	cpd04539	734	cpd04539_c0	2-Amino-3-oxo-4-phosphonooxybutyrate		C4H7NO7P	-1	cytosol	None					No Big ID, No KeggID, Using SEED model metabolite description
cpd00182_e0	adn_e	adn_e	adn_e	adn	735	cpd00182_e0	Adenosine		C10H13N5O4	0	extracellular	C00212,D00045,D06298					According to Big ID database, OK
cpd00149_e0	cobalt2_e	cobalt2_e	cobalt2_e	cobalt2	736	cpd00149_e0	Co2+		Co	2	extracellular	C00175,C19171					According to Big ID database, OK
cpd15793_c0	cpd15793_c	cpd15793_c	cpd15793_c	cpd15793	737	cpd15793_c0	Stearoylcardiolipin (B. subtilis)		C81H156O17P2	-2	cytosol	None					No Big ID, No KeggID, Using SEED model metabolite description
cpd15540_c0	pg180_c	pg180_c	pg180_c	pg180	738	cpd15540_c0	Phosphatidylglycerol dioctadecanoyl		C42H82O10P	-1	cytosol	None					According to Big ID database
cpd00222_c0	glcn_c	glcn_c	glcn_c	glcn	739	cpd00222_c0	D-Gluconate		C6H11O7	-1	cytosol	C00257					According to Big ID database, OK
cpd00794_e0	tre_e	tre_e	tre_e	tre	740	cpd00794_e0	Trehalose		C12H22O11	0	extracellular	C01083,G00293					According to Big ID database, OK
cpd02197_c0	5fthf_c	5fthf_c	5fthf_c	5fthf	741	cpd02197_c0	5-Formyltetrahydrofolate		C20H21N7O7	-2	cytosol	C03479,D07986					According to Big ID database, OK
cpd02333_c0	quln_c	quln_c	quln_c	quln	742	cpd02333_c0	Quinolinate		C7H3NO4	-2	cytosol	C03722					According to Big ID database, OK
cpd03128_c0	dcacoa_c	dcacoa_c	dcacoa_c	dcacoa	743	cpd03128_c0	Decanoyl-CoA (n-C10:0CoA)		C31H51N7O17P3S	-3	cytosol	C05274					According to Big ID database, OK
cpd00506_c0	glucys_c	glucys_c	glucys_c	glucys	744	cpd00506_c0	Gamma-L-Glutamyl-L-cysteine		C8H13N2O5S	-1	cytosol	C00669					According to Big ID database, OK
cpd00138_e0	man_e	man_e	man_e	man	745	cpd00138_e0	D-Mannose		C6H12O6	0	extracellular	C00159					According to Big ID database, OK
cpd00342_c0	acorn_c	acorn_c	acorn_c	acorn	746	cpd00342_c0	N2-Acetyl-L-ornithine		C7H14N2O3	0	cytosol	C00437					According to Big ID database, OK
cpd01693_c0	suc6p_c	suc6p_c	suc6p_c	suc6p	747	cpd01693_c0	Sucrose 6-phosphate		C12H22O14P	-1	cytosol	C02591,C16688,G10508					According to Big ID database, OK
cpd00076_e0	sucr_e	sucr_e	sucr_e	sucr	748	cpd00076_e0	Sucrose		C12H22O11	0	extracellular	C00089,D00025,G00370					According to Big ID database, OK
cpd00117_e0	ala__D_e	ala__D_e	ala__D_e	ala-D	749	cpd00117_e0	D-Alanine		C3H7NO2	0	extracellular	C00133					According to Big ID database, OK
cpd00179_e0	malt_e	malt_e	malt_e	malt	750	cpd00179_e0	Maltose		C12H22O11	0	extracellular	C00208,D00044,G00275					According to Big ID database, OK
cpd15605_e0	gly_phe__L_e	gly_phe__L_e	gly_phe__L_e	gly_phe-L	751	cpd15605_e0	Gly-Phe		C11H14N2O3	0	extracellular	None					According to Big ID database
cpd11516_c0	cpd11516_c	cpd11516_c	cpd11516_c	cpd11516	752	cpd11516_c0	14-methyl-3-oxo-hexa-decanoyl-ACP		C28H51N2O9PRS	-1	cytosol	None					No Big ID, No KeggID, Using SEED model metabolite description
cpd00073_c0	urea_c	urea_c	urea_c	urea	753	cpd00073_c0	Urea		CH4N2O	0	cytosol	C00086,D00023,D01749,D10496					According to Big ID database, OK
cpd00073_e0	urea_e	urea_e	urea_e	urea	754	cpd00073_e0	Urea		CH4N2O	0	extracellular	C00086,D00023,D01749,D10496					According to Big ID database, OK
cpd00118_e0	ptrc_e	ptrc_e	ptrc_e	ptrc	755	cpd00118_e0	Putrescine		C4H14N2	2	extracellular	C00134					According to Big ID database, OK
cpd03130_c0	oc2coa_c	oc2coa_c	oc2coa_c	oc2coa	756	cpd03130_c0	Trans-Oct-2-enoyl-CoA		C29H45N7O17P3S	-3	cytosol	C05276					According to Big ID database, OK
cpd11582_e0	ala_L_thr__L_e	ala_L_thr__L_e	ala_L_thr__L_e	ala_L_thr-L	757	cpd11582_e0	ala-L-Thr-L		C7H14N2O4	0	extracellular	None					According to Big ID database
cpd03847_e0	ttdca_e	ttdca_e	ttdca_e	ttdca	758	cpd03847_e0	Tetradecanoate (n-C14:0)		C14H27O2	-1	extracellular	C06424					According to Big ID database, OK
cpd00637_e0	met__D_e	met__D_e	met__D_e	met-D	759	cpd00637_e0	D-Methionine		C5H11NO2S	0	extracellular	C00855					According to Big ID database, OK
cpd00860_c0	sdhlam_c	sdhlam_c	sdhlam_c	sdhlam	760	cpd00860_c0	S Succinyldihydrolipoamide C12H20NO4S2		C12H20NO4S2	-1	cytosol	C01169					According to Big ID database, OK
cpd11588_e0	gly_pro__L_e	gly_pro__L_e	gly_pro__L_e	gly_pro-L	761	cpd11588_e0	gly-pro-L		C7H12N2O3	0	extracellular	None					According to Big ID database
cpd03587_c0	lipa_c	lipa_c	lipa_c	lipa	762	cpd03587_c0	KDO(2)-lipid (A)		C110H198N2O39P2	-4	cytosol	C06026					According to Big ID database, OK
cpd02113_c0	dtdprmn_c	dtdprmn_c	dtdprmn_c	dtdprmn	763	cpd02113_c0	DTDP-L-rhamnose		C16H24N2O15P2	-2	cytosol	C03319					According to Big ID database, OK
cpd00075_e0	no2_e	no2_e	no2_e	no2	764	cpd00075_e0	Nitrite		NO2	-1	extracellular	C00088					According to Big ID database, OK
cpd01335_c0	occoa_c	occoa_c	occoa_c	occoa	765	cpd01335_c0	Octanoyl-CoA (n-C8:0CoA)		C29H47N7O17P3S	-3	cytosol	C01944					According to Big ID database, OK
cpd00221_e0	lac__D_e	lac__D_e	lac__D_e	lac__D	766	cpd00221_e0	D-Lactate		C3H5O3	-1	extracellular	C00256					According to Big ID database, OK
cpd00654_e0	dcyt_e	dcyt_e	dcyt_e	dcyt	767	cpd00654_e0	Deoxycytidine		C9H13N3O4	0	extracellular	C00881,D06196					According to Big ID database, OK
cpd10516_e0	fe3_e	fe3_e	fe3_e	fe3	768	cpd10516_e0	Fe3+		Fe	3	extracellular	C14819					According to Big ID database, OK
cpd00001_e0	h2o_e	h2o_e	h2o_e	h2o	769	cpd00001_e0	H2O		H2O	0	extracellular	C00001,C01328,D00001,D03703,D06322					According to Big ID database, OK
cpd00011_e0	co2_e	co2_e	co2_e	co2	770	cpd00011_e0	CO2		CO2	0	extracellular	C00011,D00004					According to Big ID database, OK
cpd00007_e0	o2_e	o2_e	o2_e	o2	771	cpd00007_e0	O2		O2	0	extracellular	C00007,D00003					According to Big ID database, OK
cpd01298_c0	aact_c	aact_c	aact_c	aact	772	cpd01298_c0	Aminoacetone		C3H8NO	1	cytosol	C01888					According to Big ID database, OK
cpd00063_c0	ca2_c	ca2_c	ca2_c	ca2	773	cpd00063_c0	Calcium		Ca	2	cytosol	C00076					According to Big ID database, OK
cpd15432_c0	colipa_c	colipa_c	colipa_c	colipa	774	cpd15432_c0	core oligosaccharide lipid A		C176H307N2O100P4	-7	cytosol	None					According to Big ID database		colipa_c
cpd00002_e0	atp_e	atp_e	atp_e	atp	775	cpd00002_e0	ATP		C10H13N5O13P3	-3	extracellular	C00002,D08646					According to Big ID database, OK
cpd00003_e0	nad_e	nad_e	nad_e	nad	776	cpd00003_e0	Nicotinamide adenine dinucleotide		C21H26N7O14P2	-1	extracellular	C00003,D00002					According to Big ID database, OK
cpd00006_e0	nadp_e	nadp_e	nadp_e	nadp	777	cpd00006_e0	Nicotinamide adenine dinucleotide phosphate		C21H26N7O17P3	-2	extracellular	C00006					According to Big ID database, OK
cpd00010_e0	coa_e	coa_e	coa_e	coa	778	cpd00010_e0	Coenzyme A		C21H33N7O16P3S	-3	extracellular	C00010					According to Big ID database, OK
cpd00016_e0	pydx5p_e	pydx5p_e	pydx5p_e	pydx5p	779	cpd00016_e0	Pyridoxal 5-phosphate		C8H9NO6P	-1	extracellular	C00018					According to Big ID database
cpd00017_e0	amet_e	amet_e	amet_e	amet	780	cpd00017_e0	S-Adenosyl-L-methionine		C15H23N6O5S	1	extracellular	C00019,D07128					According to Big ID database, OK
cpd00038_e0	gtp_e	gtp_e	gtp_e	gtp	781	cpd00038_e0	GTP		C10H13N5O14P3	-3	extracellular	C00044					According to Big ID database, OK
cpd00052_e0	ctp_e	ctp_e	ctp_e	ctp	782	cpd00052_e0	CTP		C9H13N3O14P3	-3	extracellular	C00063					According to Big ID database
cpd00053_e0	gln__L_e	gln__L_e	gln__L_e	gln-L	783	cpd00053_e0	L-Glutamine		C5H10N2O3	0	extracellular	C00064,D00015					According to Big ID database, OK
cpd00056_e0	thmpp_e	thmpp_e	thmpp_e	thmpp	784	cpd00056_e0	Thiamine diphosphate		C12H17N4O7P2S	-1	extracellular	C00068					According to Big ID database, OK
cpd00062_e0	utp_e	utp_e	utp_e	utp	785	cpd00062_e0	UTP		C9H12N2O15P3	-3	extracellular	C00075					According to Big ID database, OK
cpd00084_e0	cys__L_e	cys__L_e	cys__L_e	cys-L	786	cpd00084_e0	L-Cysteine		C3H7NO2S	0	extracellular	C00097,D00026					According to Big ID database, OK
cpd00087_e0	thf_e	thf_e	thf_e	thf	787	cpd00087_e0	5,6,7,8-Tetrahydrofolate		C19H21N7O6	-2	extracellular	C00101					According to Big ID database, OK
cpd00115_e0	datp_e	datp_e	datp_e	datp	788	cpd00115_e0	dATP		C10H13N5O12P3	-3	extracellular	C00131					According to Big ID database
cpd00132_e0	asn__L_e	asn__L_e	asn__L_e	asn-L	789	cpd00132_e0	L-Asparagine		C4H8N2O3	0	extracellular	C00152					According to Big ID database, OK
cpd00161_e0	thr__L_e	thr__L_e	thr__L_e	thr-L	790	cpd00161_e0	L-Threonine		C4H9NO3	0	extracellular	C00188,D00041					According to Big ID database, OK
cpd00166_e0	adocbl_e	adocbl_e	adocbl_e	adocbl	791	cpd00166_e0	Adenosylcobalamin		C72H101CoN18O17P	1	extracellular	C00194,D00042					According to Big ID database, OK
cpd00201_e0	10fthf_e	10fthf_e	10fthf_e	10fthf	792	cpd00201_e0	10-Formyltetrahydrofolate		C20H21N7O7	-2	extracellular	C00234					According to Big ID database, OK
cpd00220_e0	ribflv_e	ribflv_e	ribflv_e	ribflv	793	cpd00220_e0	Riboflavin		C17H20N4O6	0	extracellular	C00255,D00050					According to Big ID database, OK
cpd00345_e0	5mthf_e	5mthf_e	5mthf_e	5mthf	794	cpd00345_e0	5-Methyltetrahydrofolate		C20H23N7O6	-2	extracellular	C00440,D09353					According to Big ID database, OK
cpd02229_e0	udcpdp_e	udcpdp_e	udcpdp_e	udcpdp	795	cpd02229_e0	Bactoprenyl diphosphate		C55H90O7P2	-2	extracellular	None					According to Big ID database
cpd11493_e0	ACP_e	ACP_e	ACP_e	ACP	796	cpd11493_e0	Acyl carrier protein		C11H21N2O7PRS	-1	extracellular	C00145,C00229,C00812,C01336,C04298,C11482,C16736					According to Big ID database
cpd15352_e0	2dmmq8_e	2dmmq8_e	2dmmq8_e	2dmmq8	797	cpd15352_e0	2-Demethylmenaquinone 8		C50H70O2	0	extracellular	None					According to Big ID database		#N/A
cpd15500_e0	mqn8_e	mqn8_e	mqn8_e	mqn8	798	cpd15500_e0	Menaquinone 8		C51H72O2	0	extracellular	None					According to Big ID database		#N/A
cpd15533_e0	pe180_e	pe180_e	pe180_e	pe180	799	cpd15533_e0	Phosphatidylethanolamine (dioctadecanoyl, n-C18:0)		C41H82NO8P	0	extracellular	None					According to Big ID database
cpd15540_e0	pg180_e	pg180_e	pg180_e	pg180	800	cpd15540_e0	Phosphatidylglycerol (dioctadecanoyl, n-C18:0)		C42H82O10P	-1	extracellular	None					According to Big ID database
cpd15560_e0	q8_e	q8_e	q8_e	q8	801	cpd15560_e0	Ubiquinone-8		C49H74O4	0	extracellular	C17569					According to Big ID database
cpd15665_e0	mDB_peptido_CV_e	mDB_peptido_CV_e	peptido_CV_e	cpd15665	802	cpd15665_e0	Peptidoglycan polymer (n subunits)		C80H126N16O42	-4	extracellular	None					No Big ID, No KeggID, Using SEED model metabolite description changed R to H to meet big ID formulae
cpd15695_e0	cpd15695_e	cpd15695_e	cpd15695_e	cpd15695	803	cpd15695_e0	Diisoheptadecanoylphosphatidylethanolamine		C39H78NO8P	0	extracellular	None					No Big ID, No KeggID, Using SEED model metabolite description
cpd15696_e0	cpd15696_e	cpd15696_e	cpd15696_e	cpd15696	804	cpd15696_e0	Dianteisoheptadecanoylphosphatidylethanolamine		C39H78NO8P	0	extracellular	None					No Big ID, No KeggID, Using SEED model metabolite description
cpd15722_e0	cpd15722_e	cpd15722_e	cpd15722_e	cpd15722	805	cpd15722_e0	Diisoheptadecanoylphosphatidylglycerol		C40H78O10P	0	extracellular	None					No Big ID, No KeggID, Using SEED model metabolite description
cpd15723_e0	cpd15723_e	cpd15723_e	cpd15723_e	cpd15723	806	cpd15723_e0	Dianteisoheptadecanoylphosphatidylglycerol		C40H78O10P	0	extracellular	None					No Big ID, No KeggID, Using SEED model metabolite description
cpd15793_e0	cpd15793_e	cpd15793_e	cpd15793_e	cpd15793	807	cpd15793_e0	Stearoylcardiolipin (B. subtilis)		C81H156O17P2	0	extracellular	None					No Big ID, No KeggID, Using SEED model metabolite description
cpd15794_e0	cpd15794_e	cpd15794_e	cpd15794_e	cpd15794	808	cpd15794_e0	Isoheptadecanoylcardiolipin (B. subtilis)		C77H148O17P2	0	extracellular	None					No Big ID, No KeggID, Using SEED model metabolite description
cpd15795_e0	cpd15795_e	cpd15795_e	cpd15795_e	cpd15795	809	cpd15795_e0	Anteisoheptadecanoylcardiolipin (B. subtilis)		C77H148O17P2	0	extracellular	None					No Big ID, No KeggID, Using SEED model metabolite description
cpd03422_e0	cbi_e	cbi_e	cbi_e	cbi	810	cpd03422_e0	Cobinamide		C48H73CoN11O8	1	extracellular	C05774					According to Big ID database, OK
cpd12370_e0	apoACP_e	apoACP_e	apoACP_e	apoACP	811	cpd12370_e0	apo-ACP		HOR	0	extracellular	C03688					According to Big ID database
cpd00008_e0	adp_e	adp_e	adp_e	adp	812	cpd00008_e0	ADP		C10H13N5O10P2	-2	extracellular	C00008,G11113					According to Big ID database, OK
cpd00393_e0	fol_e	fol_e	fol_e	fol	813	cpd00393_e0	Folate		C19H17N7O6	0	extracellular	C00504,D00070					According to Big ID database, OK
cpd00653_e0	galctn__D_e	galctn__D_e	galctn__D_e	galctn-D	814	cpd00653_e0	D-Galactonate		C6H11O7	-1	extracellular	C00880					According to Big ID database, OK
cpd00137_e0	cit_e	cit_e	cit_e	cit	815	cpd00137_e0	Citrate		C6H5O7	-3	extracellular	C00158,D00037					According to Big ID database, OK
cpd00035_e0	ala__L_e	ala__L_e	ala__L_e	ala-L	816	cpd00035_e0	L-Alanine		C3H7NO2	0	extracellular	C00041,D00012					According to Big ID database, OK
cpd00065_e0	trp__L_e	trp__L_e	trp__L_e	trp-L	817	cpd00065_e0	L-Tryptophan		C11H12N2O2	0	extracellular	C00078,D00020					According to Big ID database, OK
cpd00142_e0	acac_e	acac_e	acac_e	acac	818	cpd00142_e0	Acetoacetate		C4H5O3	-1	extracellular	C00164					According to Big ID database, OK
cpd00066_e0	phe__L_e	phe__L_e	phe__L_e	phe-L	819	cpd00066_e0	L-Phenylalanine		C9H11NO2	0	extracellular	C00079,D00021					According to Big ID database, OK
cpd00069_e0	tyr__L_e	tyr__L_e	tyr__L_e	tyr-L	820	cpd00069_e0	L-Tyrosine		C9H11NO3	0	extracellular	C00082,D00022					According to Big ID database, OK
cpd00063_e0	ca2_e	ca2_e	ca2_e	ca2	821	cpd00063_e0	Calcium		Ca	2	extracellular	C00076					According to Big ID database, OK
cpd15432_e0	colipa_e	colipa_e	colipa_e	colipa	822	cpd15432_e0	core oligosaccharide lipid A		C176H307N2O100P4	-7	extracellular	None					According to Big ID database		#N/A
cpd00028_e0	pheme_e	pheme_e	pheme_e	pheme	823	cpd00028_e0	Protoheme		C34H30FeN4O4	-2	extracellular	C00032					According to Big ID database, OK
cpd00042_e0	gthrd_e	gthrd_e	gthrd_e	gthrd	824	cpd00042_e0	GSH		C10H16N3O6S	-1	extracellular	None					According to Big ID database
cpd00557_e0	sheme_e	sheme_e	sheme_e	sheme	825	cpd00557_e0	Siroheme		C42H36FeN4O16	-8	extracellular	C00748					According to Big ID database
cpd00939_c0	4ahmmp_c	4ahmmp_c	4ahmmp_c	4ahmmp	826	cpd00939_c0	4-Amino-5-hydroxymethyl-2-methylpyrimidine		C6H9N3O	0	cytosol	C01279					According to Big ID database, OK
cpd02775_c0	4ampm_c	4ampm_c	4ampm_c	4ampm	827	cpd02775_c0	4-Amino-2-methyl-5-phosphomethylpyrimidine		C6H9N3O4P	-1	cytosol	C04556					According to Big ID database, OK
cpd00145_c0	hpyr_c	hpyr_c	hpyr_c	hpyr	828	cpd00145_c0	Hydroxypyruvate		C3H3O4	-1	cytosol	C00168					According to Big ID database, OK
cpd03584_c0	u3hga_c	u3hga_c	u3hga_c	u3hga	829	cpd03584_c0	UDP-3-O-(3-hydroxytetradecanoyl)-D-glucosamine		C29H50N3O18P2	-1	cytosol	C06022					According to Big ID database, OK
cpd02930_c0	lipidX_HP_c	lipidX_HP_c	lipidX_HP_c	lipidX_HP	830	cpd02930_c0	Lipid X		C34H65NO12P	0	cytosol	C04824					According to Big ID database
cpd03585_c0	kdolipid4_c	kdolipid4_c	kdolipid4_c	kdolipid4	831	cpd03585_c0	KDO-lipid IV(A)		C76H139N2O30P2	-3	cytosol	C06024,G11161					According to Big ID database, OK
cpd15550_c0	phphhlipa_c	phphhlipa_c	phphhlipa_c	phphhlipa	832	cpd15550_c0	phospho-heptosyl-phospho-heptosyl-heptosyl-kdo2-lipidA		C131H234N2O63P4	-6	cytosol	None					According to Big ID database		phphhlipa_c
cpd15492_c0	kphphhlipa_c	kphphhlipa_c	kphphhlipa_c	kphphhlipa	833	cpd15492_c0	kdo-phospho-heptosyl-phospho-heptosyl-heptosyl-kdo2-lipidA		C139H245N2O70P4	-7	cytosol	None					According to Big ID database		kphphhlipa_c
cpd15477_c0	gggagicolipa_c	gggagicolipa_c	gggagicolipa_c	gggagicolipa	834	cpd15477_c0	glucosyl-glucosyl-galactosyl-glucosyl-inner core oligosaccharide lipid A		C169H295N2O94P4	-7	cytosol	None					According to Big ID database		gggagicolipa_c
cpd00158_e0	cellb_e	cellb_e	cellb_e	cellb	835	cpd00158_e0	Cellobiose		C12H22O11	0	extracellular	C00185,C06422,G00289					According to Big ID database, OK
cpd00079_e0	g6p_e	g6p_e	g6p_e	g6p	836	cpd00079_e0	D-Glucose 6-phosphate		C6H12O9P	-1	extracellular	C00092					According to Big ID database, OK
cpd00331_e0	acon_C_e	acon_C_e	acon_C_e	acon	837	cpd00331_e0	Cis-Aconitate		C6H3O6	0	extracellular	C00417					According to Big ID database, OK
cpd00222_e0	glcn_e	glcn_e	glcn_e	glcn	838	cpd00222_e0	D-Gluconate		C6H11O7	-1	extracellular	C00257					According to Big ID database, OK
cpd00797_e0	bhb_e	bhb_e	bhb_e	bhb	839	cpd00797_e0	(R)-3-Hydroxybutanoate		C4H7O3	0	extracellular	C01089					According to Big ID database, OK
cpd00581_e0	urcan_e	urcan_e	urcan_e	urcan	840	cpd00581_e0	Urocanate		C6H5N2O2	0	extracellular	C00785					According to Big ID database
cpd00089_e0	g1p_e	g1p_e	g1p_e	g1p	841	cpd00089_e0	D-Glucose 1-phosphate		C6H12O9P	-1	extracellular	C00103					According to Big ID database, OK
cpd24451_c0	cpd24451_c	cpd24451_c	cpd11594_c	cpd11594	842	cpd24451_c0	Alpha cyclodextrin		C36H60O30	0	cytosol	C00973					No Big ID, Using SEED model metabolite description
cpd24451_e0	cpd24451_e	cpd24451_e	cpd11594_e	cpd11594	843	cpd24451_e0	Alpha cyclodextrin		C36H60O30	0	extracellular	C00973					No Big ID, Using SEED model metabolite description
cpd00224_c0	arab__L_c	arab__L_c	arab__L_c	arab-L	844	cpd00224_c0	L-Arabinose		C5H10O5	0	cytosol	C00259					According to Big ID database, OK
cpd00224_e0	arab__L_e	arab__L_e	arab__L_e	arab-L	845	cpd00224_e0	L-Arabinose		C5H10O5	0	extracellular	C00259					According to Big ID database, OK
None	mDB_allul_e	mDB_allul_e	allul_e	allul	846	None	allulose		C6H12O6	0	extracellular	C06468					No Big ID, Using SEED model metabolite description
cpd15394_c0	allul6p_c	allul6p_c	allul6p_c	allul6p	847	cpd15394_c0	Allulose 6-phosphate		C6H12O9P	-1	cytosol	None					According to Big ID database
None	mDB_2i3ip_c	mDB_2i3ip_c	2i3ip_c	2i3ip	848	None	2 - imino - 3- (indol-3-yl)propanoate		C11H9N2O2	-1	cytosol	C21124					Manual, no BIGGID
None	mDB_pdvnate_c	mDB_pdvnate_c	pdvnate_c	pdvnate	849	None	Protodeoxyviolaceinate		C21H14N3O2	-1	cytosol	C21131					Manual, no BIGGID
None	mDB_pvnate_c	mDB_pvnate_c	pvnate_c	pvnate	850	None	Protoviolaceinate		C21H14N3O3	-1	cytosol	C21134					Manual, no BIGGID
None	mDB_vnate_c	mDB_vnate_c	vnate_c	vnate	851	None	Violaceinate		C21H14N3O4	-1	cytosol	C21135					Manual, no BIGGID
None	mDB_vio_c	mDB_vio_c	vio_c	vio	852	None	Violacein		C20H13N3O3	0	cytosol	C21136					Manual, no BIGGID
None	mDB_dvnate_c	mDB_dvnate_c	dvnate_c	dvnate	853	None	Deoxyviolaceinate		C21H14N3O3	-1	cytosol	C21132					Manual, no BIGGID
None	mDB_dvio_c	mDB_dvio_c	dvio_c	dvio	854	None	Deoxyviolacein		C20H13N3O2	0	cytosol	C21133					Manual, no BIGGID
None	mDB_prodvio_c	mDB_prodvio_c	prodvio_c	prodvio	855	None	Prodeoxyviolacein		C20H13N3O	0	cytosol	None					Manual, no BIGGID
None	mDB_vio_e	mDB_vio_e	vio_e	vio	856	None	Violacein		C20H13N3O3	0	extracellular	C21136					Manual, no BIGGID
None	mDB_dvio_e	mDB_dvio_e	dvio_e	dvio	857	None	Deoxyviolacein		C20H13N3O2	0	extracellular	C21133					Manual, no BIGGID
None	mDB_prodvio_e	mDB_prodvio_e	prodvio_e	prodvio	858	None	Prodeoxyviolacein		C20H13N3O	0	extracellular	None					Manual, no BIGGID
cpd00198_c0	abt__D_c	abt__D_c	abt__D_c	abt-D	859	cpd00198_c0	D-Arabitol		C5H12O5	0	cytosol	C01904					According to Big ID database, OK
cpd00259_c0	xylu__D_c	xylu__D_c	xylu__D_c	xylu-D	860	cpd00259_c0	D - Xylulose		C5H10O5	0	cytosol	C00310					According to Big ID database, OK
cpd01307_c0	abt__D_e	abt__D_e	abt__D_e	abt-D	861	cpd01307_c0	D-Arabitol		C5H12O5	0	extracellular	C01904					According to Big ID database, OK
None	mDB_tur_e	mDB_tur_e	tur_e	tur	862	None	Turanose		C12H22O11	0	extracellular	C19636					No BiggID
None	mDB_tur6p_c	mDB_tur6p_c	tur6p_c	tur6p	863	None	Turanose - 6 - phosphate		C12H21O14P	-2	cytosol	None					PubChem 90657440, noBIGGID, no KEGGID
cpd27186_c0	cpd_glycogen_c	cpd_glycogen_c	cpd_glycogen_c	cpd_glycogen	864	cpd27186_c0	Glycogen		C24H42O21	0	cytosol	C00182					BiggID exists but molecular formula different so new cpd ID
cpd27186_e0	cpd_glycogen_e	cpd_glycogen_e	cpd_glycogen_e	cpd_glycogen	865	cpd27186_e0	Glycogen		C24H42O21	0	extracellular	C00182					BiggID exists but molecular formula different so new cpd ID
cpd11594_c0	cpd11594_c	cpd11594_c	cpd11594_c	cpd11594	866	cpd11594_c0	Dextrin		C36H62O31	0	cytosol	C00721					BiggID exists but molecular formula different, so used seed ID
cpd11594_e	cpd11594_e	cpd11594_e	cpd11594_e	cpd11594	867	cpd11594_e	Dextrin		C36H62O31	0	extracellular	C00721					BiggID exists but molecular formula different, so used seed ID
cpd00111_c0	gthox_c	gthox_c	gthox_c	gthox	868	cpd00111_c0	Oxidized glutathione		C20H30N6O12S2	-2	cytosol	C00127, D00031					According to Big ID database, OK
cpd15528_c0	pe120_c	pe120_c	pe120_c	pe120	869	cpd15528_c0	Phosphatidylethanolamine (didodecanoyl, n-C12:0)		C29H58NO8P	0	cytosol	None					According to Big ID database
None	pe140_c	pe140_c	pe140_c	pe140	870	None	phosphatidylethanolamine ditetradecanoyl		C33H66NO8P	0	cytosol	None					According to Big ID database
cpd15531_c0	pe160_c	pe160_c	pe160_c	pe160	871	cpd15531_c0	Phosphatidylethanolamine (dihexadecanoyl, n-C16:0)		C37H74NO8P	0	cytosol	None					According to Big ID database
cpd15532_c0	pe161_c	pe161_c	pe161_c	pe161	872	cpd15532_c0	Phosphatidylethanolamine (dihexadec-9enoyl, n-C16:1)		C37H70NO8P	0	cytosol	None					According to Big ID database
cpd15534_c0	pe181_c	pe181_c	pe181_c	pe181	873	cpd15534_c0	Phosphatidylethanolamine (dioctadec-11-enoyl, n-C18:1)		C41H78NO8P	0	cytosol	None					According to Big ID database
None	pe170cyc_c	pe170cyc_c	pe170cyc_c	pe170cyc	874	None	pe170cyc		None	0	cytosol	None					From iPY1537, no biggID
cpd15535_c0	pg120_c	pg120_c	pg120_c	pg120	875	cpd15535_c0	Phosphatidylglycerol (didodecanoyl, n-C12:0)		C30H58O10P	-1	cytosol	None					According to Big ID database
None	pg140_c	pg140_c	pg140_c	pg140	876	None	Myristoylcardiolipin (B. subtilis)		C34H66O10P	-1	cytosol	None					According to Big ID database
cpd15538_c0	pg160_c	pg160_c	pg160_c	pg160	877	cpd15538_c0	Phosphatidylglycerol (dihexadecanoyl, n-C16:0)		C38H74O10P	-1	cytosol	None					According to Big ID database
cpd15539_c0	pg161_c	pg161_c	pg161_c	pg161	878	cpd15539_c0	Phosphatidylglycerol (dihexadec-9-enoyl, n-C16:1)		C38H70O10P	-1	cytosol	None					According to Big ID database
cpd15541_c0	pg181_c	pg181_c	pg181_c	pg181	879	cpd15541_c0	Phosphatidylglycerol (dioctadec-11-enoyl, n-C18:1)		C42H78O10P	-1	cytosol	None					According to Big ID database
None	pg170cyc_c	pg170cyc_c	pg170cyc_c	pg170cyc	880	None	pg170cyc		None	0	cytosol	None					From iPY1537, no biggID
cpd15791_c0	clpn160_c	clpn160_c	clpn160_c	clpn160	881	cpd15791_c0	cardiolipin (tetrahexadecanoyl, n-C16:0)		C73H140O17P2	-2	cytosol	None					According to Big ID database
cpd15792_c0	clpn140_c	clpn140_c	clpn140_c	clpn140	882	cpd15792_c0	cardiolipin (tetratetradecanoyl, n-C14:0)		C65H124O17P2	-2	cytosol	None					According to Big ID database
cpd15425_c0	clpn120_c	clpn120_c	clpn120_c	clpn120	883	cpd15425_c0	cardiolipin (tetradodecanoyl, n-C12:0)		C57H108O17P2	-2	cytosol	None					According to Big ID database
cpd15429_c0	clpn161_c	clpn161_c	clpn161_c	clpn161	884	cpd15429_c0	cardiolipin (tetrahexadec-9-enoyl, n-C16:1)		C73H132O17P2	-2	cytosol	None					According to Big ID database
cpd15431_c0	clpn181_c	clpn181_c	clpn181_c	clpn181	885	cpd15431_c0	cardiolipin (tetraoctadec-11-enoyl, n-C18:1)		C81H148O17P2	-2	cytosol	None					According to Big ID database
None	clpn170cyc_c	clpn170cyc_c	clpn170cyc_c	clpn170cyc	886	None	clpn170cyc		None	0	cytosol	None					From iPY1537, no biggID
cpd15545_c0	pgp160_c	pgp160_c	pgp160_c	pgp160	887	cpd15545_c0	Phosphatidylglycerophosphate (dihexadecanoyl, n-C16:0)		C38H74O13P2	-2	cytosol	None					According to Big ID database
cpd15555_c0	ps160_c	ps160_c	ps160_c	ps160	888	cpd15555_c0	Phosphatidylserine (dihexadecanoyl, n-C16:0)		C38H72NO10P	-2	cytosol	None					According to Big ID database
cpd15548_c0	pgp181_c	pgp181_c	pgp181_c	pgp181	889	cpd15548_c0	Phosphatidylglycerophosphate (dioctadec-11-enoyl, n-C18:1)		C42H78O13P2	-2	cytosol	None					According to Big ID database
cpd15546_c0	pgp161_c	pgp161_c	pgp161_c	pgp161	890	cpd15546_c0	Phosphatidylglycerophosphate (dihexadec-9-enoyl, n-C16:1)		C38H70O13P2	-2	cytosol	None					According to Big ID database
cpd15558_c0	ps181_c	ps181_c	ps181_c	ps181	891	cpd15558_c0	Phosphatidylserine (dioctadec-11-enoyl, n-C18:1)		C42H76NO10P	-2	cytosol	None					According to Big ID database
None	ps140_c	ps140_c	ps140_c	ps140	892	None	phosphatidylserine ditetradecanoyl		C34H64NO10P	-2	cytosol	None					According to Big ID database
cpd15542_c0	pgp120_c	pgp120_c	pgp120_c	pgp120	893	cpd15542_c0	Phosphatidylglycerophosphate (didodecanoyl, n-C12:0)		C30H58O13P2	-2	cytosol	None					According to Big ID database
cpd15552_c0	ps120_c	ps120_c	ps120_c	ps120	894	cpd15552_c0	Phosphatidylserine (didodecanoyl, n-C12:0)		C30H56NO10P	-2	cytosol	None					According to Big ID database
None	pgp140_c	pgp140_c	pgp140_c	pgp140	895	None	Phosphatidylglycerophosphate ditetradecanoyl		C34H66O13P2	-2	cytosol	None					According to Big ID database
cpd15556_c0	ps161_c	ps161_c	ps161_c	ps161	896	cpd15556_c0	Phosphatidylserine (dihexadec-9-enoyl, n-C16:1)		C38H68NO10P	-2	cytosol	None					According to Big ID database
None	pe160161_c	pe160161_c	pe160161_c	pe160161	897	None	pe160161		C37H72N1O8P1	0	cytosol	None					From iPY1537, no biggID
None	pg160161_c	pg160161_c	pg160161_c	pg160161	898	None	pg160161		C38H72O10P1	0	cytosol	None					From iPY1537, no biggID
None	clpn160161_c	clpn160161_c	clpn160161_c	clpn160161	899	None	clpn160161		C73H136O17P2	0	cytosol	None					From iPY1537, no biggID
None	ps160161_c	ps160161_c	ps160161_c	ps160161	900	None	ps160161		C38H71N1O10P1	0	cytosol	None					From iPY1537, no biggID
None	cdppa160161_c	cdppa160161_c	cdppa160161_c	cdppa160161	901	None	cdp-pa160161		C44H77N3O15P2	0	cytosol	None					From iPY1537, no biggID
None	pa160161_c	pa160161_c	pa160161_c	pa160161	902	None	pa160161		C35H65O8P1	0	cytosol	None					From iPY1537, no biggID
cpd15239_c0	hdeacp_c	hdeacp_c	hdeacp_c	hdeacp	903	cpd15239_c0	Cis-hexadec-9-enoyl-acyl-carrier protein (n-C16:1)		C27H49N2O8PRS	-1	cytosol	None					According to Big ID database		hdeACP_c
None	pgp160161_c	pgp160161_c	pgp160161_c	pgp160161	904	None	pgp160161		C38H71O13P2	0	cytosol	None					From iPY1537, no biggID
cpd15325_c0	1ddecg3p_c	1ddecg3p_c	1ddecg3p_c	1ddecg3p	905	cpd15325_c0	1-dodecanoyl-sn-glycerol 3-phosphate		C15H30O7P	-1	cytosol	C00681					According to Big ID database, OK
cpd15326_c0	1hdec9eg3p_c	1hdec9eg3p_c	1hdec9eg3p_c	1hdec9eg3p	906	cpd15326_c0	1-hexadec-9-enoyl-sn-glycerol 3-phosphate		C19H36O7P	-1	cytosol	None					According to Big ID database		1hdec9eg3p_c
cpd11825_c0	octeACP_c	octeACP_c	octeACP_c	octeACP	907	cpd11825_c0	Cis-octadec-11-enoyl-acyl-carrier protein (n-C18:1)		C29H53N2O8PRS	-1	cytosol	C01203					According to Big ID database, OK
cpd15328_c0	1odec11eg3p_c	1odec11eg3p_c	1odec11eg3p_c	1odec11eg3p	908	cpd15328_c0	1-octadec-11-enoyl-sn-glycerol 3-phosphate		C21H40O7P	-1	cytosol	None					According to Big ID database		1odec11eg3p_c
cpd05274_c0	hdcea_c	hdcea_c	hdcea_c	hdcea	909	cpd05274_c0	Hexadecenoate (n-C16:1)		C16H29O2	-1	cytosol	C08362					According to Big ID database, OK
cpd15238_c0	hdcoa_c	hdcoa_c	hdcoa_c	hdcoa	910	cpd15238_c0	Hexadecenoyl-CoA (n-C16:1CoA)		C37H61N7O17P3S	-3	cytosol	None					According to Big ID database		hdcoa_c
None	1agpe161_c	1agpe161_c	1agpe161_c	1agpe161	911	None	1-Acyl-sn-glycero-3-phosphoethanolamine hexadec-9-enoyl		C21H42NO7P	0	cytosol	C04438					According to Big ID database, OK
cpd00908_c0	g3pe_c	g3pe_c	g3pe_c	g3pe	912	cpd00908_c0	Sn-Glycero-3-phosphoethanolamine		C5H14NO6P	0	cytosol	C01233					According to Big ID database, OK
None	1agpg161_c	1agpg161_c	1agpg161_c	1agpg161	913	None	1-Acyl-sn-glycero-3-phosphoglycerol hexadec-9-enoyl		C22H42O9P	-1	cytosol	None					According to Big ID database
cpd02090_c0	g3pg_c	g3pg_c	g3pg_c	g3pg	914	cpd02090_c0	Glycerophosphoglycerol		C6H14O8P	-1	cytosol	C03274					According to Big ID database, OK
None	12dgr161_c	12dgr161_c	12dgr161_c	12dgr161	915	None	1,2-Diacyl-sn-glycerol dihexadec-9-enoyl		C35H64O5	0	cytosol	C00641					According to Big ID database, OK
cpd15354_c0	2hdec9eg3p_c	2hdec9eg3p_c	2hdec9eg3p_c	2hdec9eg3p	916	cpd15354_c0	2-hexadec-9-enoyl-sn-glycerol 3-phosphate		C19H36O7P	-1	cytosol	C03974					According to Big ID database, OK
None	2agpe161_c	2agpe161_c	2agpe161_c	2agpe161	917	None	2-Acyl-sn-glycero-3-phosphoethanolamine hexadec-9-enoyl		C21H42NO7P	0	cytosol	C05973					According to Big ID database, OK
None	2agpg161_c	2agpg161_c	2agpg161_c	2agpg161	918	None	2-Acyl-sn-glycero-3-phosphoglycerol hexadec-9-enoyl		C22H42O9P	-1	cytosol	None					According to Big ID database
cpd15376_c0	3ocvac11eacp_c	3ocvac11eacp_c	3ocvac11eacp_c	3ocvac11eacp	919	cpd15376_c0	3-oxo-cis-vacc-11-enoyl-acyl-carrier protein		C29H51N2O9PRS	-1	cytosol	None					According to Big ID database		#N/A
cpd15370_c0	3hcvac11eacp_c	3hcvac11eacp_c	3hcvac11eacp_c	3hcvac11eacp	920	cpd15370_c0	(R)-3-hydroxy-cis-vacc-11-enoyl-acyl-carrier protein		C29H53N2O9PRS	-1	cytosol	None					According to Big ID database		#N/A
None	t3c11vaceACP_c	t3c11vaceACP_c	t3c11vaceACP_c	t3c11vaceacp	921	None	Trans-3-cis-11-vacceoyl-acyl-carrier protein		C29H51N2O8PRS	-1	cytosol	None					According to Big ID database
None	2agpg181_c	2agpg181_c	2agpg181_c	2agpg181	922	None	2-Acyl-sn-glycero-3-phosphoglycerol octadec-11-enoyl		C24H46O9P	-1	cytosol	None					According to Big ID database
cpd00536_c0	ocdcea_c	ocdcea_c	ocdcea_c	ocdcea	923	cpd00536_c0	Octadecenoate (n-C18:1)		C18H33O2	-1	cytosol	C00712, D02315					According to Big ID database, OK
cpd15357_c0	2odec11eg3p_c	2odec11eg3p_c	2odec11eg3p_c	2odec11eg3p	924	cpd15357_c0	2-octadec-11-enoyl-sn-glycerol 3-phosphate		C21H40O7P	-1	cytosol	C03974					According to Big ID database, OK
None	1agpe181_c	1agpe181_c	1agpe181_c	1agpe181	925	None	L-2-Lysophosphatidylethanolamine		C23H46NO7P	0	cytosol	C04438					According to Big ID database, OK
None	2agpe181_c	2agpe181_c	2agpe181_c	2agpe181	926	None	2-Acyl-sn-glycero-3-phosphoethanolamine octadec-11-enoyl		C23H46NO7P	0	cytosol	C05973					According to Big ID database, OK
None	1agpg181_c	1agpg181_c	1agpg181_c	1agpg181	927	None	1-Acyl-sn-glycero-3-phosphoglycerol octadec-11-enoyl		C24H46O9P	-1	cytosol	None					According to Big ID database
None	12dgr181_c	12dgr181_c	12dgr181_c	12dgr181	928	None	1,2-Diacyl-sn-glycerol dioctadec-11-enoyl		C39H72O5	0	cytosol	C00641					According to Big ID database, OK
cpd15274_c0	odecoa_c	odecoa_c	odecoa_c	odecoa	929	cpd15274_c0	Octadecenoyl-CoA		C39H65N7O17P3S	-3	cytosol	None					According to Big ID database		odecoa_c
cpd15306_c0	12dgr120_c	12dgr120_c	12dgr120_c	12dgr120	930	cpd15306_c0	1,2-Diacyl-sn-glycerol didodecanoyl		C27H52O5	0	cytosol	C00641					According to Big ID database, OK
cpd15309_c0	12dgr160_c	12dgr160_c	12dgr160_c	12dgr160	931	cpd15309_c0	1,2-dihexadecanoyl-sn-glycerol		C35H68O5	0	cytosol	C00641					According to Big ID database, OK
cpd15307_c0	12dgr140_c	12dgr140_c	12dgr140_c	12dgr140	932	cpd15307_c0	1,2-Diacyl-sn-glycerol ditetradecanoyl		C31H60O5	0	cytosol	C00641					According to Big ID database, OK
cpd15311_c0	12dgr180_c	12dgr180_c	12dgr180_c	12dgr180	933	cpd15311_c0	1,2-Diacyl-sn-glycerol dioctadecanoyl		C39H76O5	0	cytosol	C00641					According to Big ID database, OK
cpd15308_c0	12dgr141_c	12dgr141_c	12dgr141_c	12dgr141	934	cpd15308_c0	1,2-Diacyl-sn-glycerol ditetradec-7-enoyl		C31H56O5	0	cytosol	C00641					According to Big ID database, OK
cpd01741_c0	ddca_c	ddca_c	ddca_c	ddca	935	cpd01741_c0	Dodecanoate (n-C12:0)		C12H23O2	-1	cytosol	None					According to Big ID database		ddca_c
cpd15298_c0	ttdcea_c	ttdcea_c	ttdcea_c	ttdcea	936	cpd15298_c0	tetradecenoate		C14H25O2	-1	cytosol	None					According to Big ID database		ttdcea_c
cpd15313_c0	1agpe120_c	1agpe120_c	1agpe120_c	1agpe120	937	cpd15313_c0	1-Acyl-sn-glycero-3-phosphoethanolamine dodecanoyl		C17H36NO7P	0	cytosol	C04438					According to Big ID database, OK
None	1agpe180_c	1agpe180_c	1agpe180_c	1agpe180	938	None	1-Acyl-sn-glycero-3-phosphoethanolamine (n-C18:0)		C23H48NO7P1	0	cytosol	C04438					According to Big ID database, OK
cpd15316_c0	1agpe160_c	1agpe160_c	1agpe160_c	1agpe160	939	cpd15316_c0	1-Acyl-sn-glycero-3-phosphoethanolamine hexadecanoyl		C21H44NO7P	0	cytosol	C04438					According to Big ID database, OK
cpd15315_c0	1agpe141_c	1agpe141_c	1agpe141_c	1agpe141	940	cpd15315_c0	1-Acyl-sn-glycero-3-phosphoethanolamine tetradec-7-enoyl		C19H38NO7P	0	cytosol	C04438					According to Big ID database, OK
cpd15314_c0	1agpe140_c	1agpe140_c	1agpe140_c	1agpe140	941	cpd15314_c0	1-Acyl-sn-glycero-3-phosphoethanolamine tetradecanoyl		C19H40NO7P	0	cytosol	C04438					According to Big ID database, OK
cpd15320_c0	1agpg141_c	1agpg141_c	1agpg141_c	1agpg141	942	cpd15320_c0	1-Acyl-sn-glycero-3-phosphoglycerol tetradec-7-enoyl		C20H38O9P	-1	cytosol	None					According to Big ID database		1agpg141_c
cpd15323_c0	1agpg180_c	1agpg180_c	1agpg180_c	1agpg180	943	cpd15323_c0	1-Acyl-sn-glycero-3-phosphoglycerol octadecanoyl		C24H48O9P	-1	cytosol	None					According to Big ID database
None	1agpg120_c	1agpg120_c	1agpg120_c	1agpg120	944	None	1-Acyl-sn-glycero-3-phosphoglycerol (n-C12:0)		C18H36O9P1	-1	cytosol	None					According to Big ID database
cpd15321_c0	1agpg160_c	1agpg160_c	1agpg160_c	1agpg160	945	cpd15321_c0	1-Acyl-sn-glycero-3-phosphoglycerol hexadecanoyl		C22H44O9P	-1	cytosol	None					According to Big ID database
cpd15319_c0	1agpg140_c	1agpg140_c	1agpg140_c	1agpg140	946	cpd15319_c0	1-Acyl-sn-glycero-3-phosphoglycerol tetradecanoyl		C20H40O9P	-1	cytosol	None					According to Big ID database
cpd15358_c0	2odecg3p_c	2odecg3p_c	2odecg3p_c	2odecg3p	947	cpd15358_c0	2-octadecanoyl-sn-glycerol 3-phosphate		C21H42O7P	-1	cytosol	C03974					According to Big ID database, OK
cpd15350_c0	2ddecg3p_c	2ddecg3p_c	2ddecg3p_c	2ddecg3p	948	cpd15350_c0	2-dodecanoyl-sn-glycerol 3-phosphate		C15H30O7P	-1	cytosol	C03974					According to Big ID database, OK
cpd15363_c0	2tdecg3p_c	2tdecg3p_c	2tdecg3p_c	2tdecg3p	949	cpd15363_c0	2-tetradecanoyl-sn-glycerol 3-phosphate		C17H34O7P	-1	cytosol	C03974					According to Big ID database, OK
cpd15355_c0	2hdecg3p_c	2hdecg3p_c	2hdecg3p_c	2hdecg3p	950	cpd15355_c0	2-hexadecanoyl-sn-glycerol 3-phosphate		C19H38O7P	-1	cytosol	C03974					According to Big ID database, OK
cpd15339_c0	2agpe160_c	2agpe160_c	2agpe160_c	2agpe160	951	cpd15339_c0	2-Acyl-sn-glycero-3-phosphoethanolamine (n-C16:0)		C21H44NO7P	0	cytosol	C05973					According to Big ID database, OK
cpd15336_c0	2agpe120_c	2agpe120_c	2agpe120_c	2agpe120	952	cpd15336_c0	2-Acyl-sn-glycero-3-phosphoethanolamine dodecanoyl		C17H36NO7P	0	cytosol	C05973					According to Big ID database, OK
cpd15348_c0	2agpg180_c	2agpg180_c	2agpg180_c	2agpg180	953	cpd15348_c0	2-Acyl-sn-glycero-3-phosphoglycerol octadecanoyl		C24H48O9P	-1	cytosol	None					According to Big ID database
cpd15346_c0	2agpg160_c	2agpg160_c	2agpg160_c	2agpg160	954	cpd15346_c0	2-Acyl-sn-glycero-3-phosphoglycerol hexadecanoyl		C22H44O9P	-1	cytosol	None					According to Big ID database
cpd15343_c0	2agpg120_c	2agpg120_c	2agpg120_c	2agpg120	955	cpd15343_c0	2-Acyl-sn-glycero-3-phosphoglycerol dodecanoyl		C18H36O9P	-1	cytosol	None					According to Big ID database
cpd15337_c0	2agpe140_c	2agpe140_c	2agpe140_c	2agpe140	956	cpd15337_c0	2-Acyl-sn-glycero-3-phosphoethanolamine tetradecanoyl		C19H40NO7P	0	cytosol	C05973					According to Big ID database, OK
cpd15341_c0	2agpe180_c	2agpe180_c	2agpe180_c	2agpe180	957	cpd15341_c0	2-Acyl-sn-glycero-3-phosphoethanolamine (n-C18:0)		C23H48NO7P	0	cytosol	C05973					According to Big ID database, OK
cpd15344_c0	2agpg140_c	2agpg140_c	2agpg140_c	2agpg140	958	cpd15344_c0	2-Acyl-sn-glycero-3-phosphoglycerol tetradecanoyl		C20H40O9P	-1	cytosol	None					According to Big ID database
cpd15544_c0	pgp141_c	pgp141_c	pgp141_c	pgp141	959	cpd15544_c0	Phosphatidylglycerophosphate ditetradec-7-enoyl		C34H62O13P2	-2	cytosol	None					According to Big ID database		pgp141_c
cpd15537_c0	pg141_c	pg141_c	pg141_c	pg141	960	cpd15537_c0	Phosphatidylglycerol ditetradec-7-enoyl		C34H62O10P	-1	cytosol	None					According to Big ID database		pg141_c
cpd15554_c0	ps141_c	ps141_c	ps141_c	ps141	961	cpd15554_c0	phosphatidylserine ditetradec-7-enoyl		C34H60NO10P	-2	cytosol	None					According to Big ID database		ps141_c
cpd15530_c0	pe141_c	pe141_c	pe141_c	pe141	962	cpd15530_c0	phosphatidylethanolamine ditetradec-7-enoyl		C33H62NO8P	0	cytosol	None					According to Big ID database		pe141_c
None	doxopa_c	doxopa_c	doxopa_c	doxopa	963	None	1,2-Dioxopropanoic acid		C3H2O4	0	cytosol	None					According to Big ID database
None	doxopa_e	doxopa_e	doxopa_e	doxopa	964	None	1,2-Dioxopropanoic acid		C3H2O4	0	extracellular	None					According to Big ID database
cpd17042_c0	mDB_DNA_c	mDB_DNA_c	DNA_c	DNA	965	cpd17042_c0	DNA		C968H1118N382O600P100	-100	cytosol	None					Manual, no BIGGID
cpd17043_c0	mDB_RNA_c	mDB_RNA_c	RNA_c	RNA	966	cpd17043_c0	RNA		C950H1082N382O700P100	-100	cytosol	None					Manual, no BIGGID
cpd17041_c0	mDB_Protein_c	mDB_Protein_c	Protein_c	Protein	967	cpd17041_c0	Protein Biosynthesis		C4629H7338N1311O1348S33	0	cytosol	None					Manual, no BIGGID
cpd00426_c0	hgentis_c	hgentis_c	hgentis_c	hgentis	968	cpd00426_c0	Homogentisate		C8H7O4	0	cytosol	C00544					According to Big ID database, OK
cpd00763_c0	4mlacac_c	4mlacac_c	4mlacac_c	4mlacac	969	cpd00763_c0	4-Maleylacetoacetate		C8H6O6	0	cytosol	C01036					According to Big ID database, OK
cpd00780_c0	4fumacac_c	4fumacac_c	4fumacac_c	4fumacac	970	cpd00780_c0	4-Fumarylacetoacetate		C8H6O6	0	cytosol	C01061					According to Big ID database, OK
cpd00151_c0	thym_c	thym_c	thym_c	thym	971	cpd00151_c0	Thymine		C5H6N2O2	0	cytosol	C00178					According to Big ID database, OK
cpd00363_c0	etoh_c	etoh_c	etoh_c	etoh	972	cpd00363_c0	Ethanol		C2H6O	0	cytosol	C00469					According to Big ID database, OK
cpd00071_e0	acald_e	acald_e	acald_e	acald	973	cpd00071_e0	Acetaldehyde		C2H4O	0	extracellular	C00084					According to Big ID database, OK
cpd00029_e0	ac_e	ac_e	ac_e	ac	974	cpd00029_e0	Acetate		C2H3O2	-1	extracellular	C00033,D00010					According to Big ID database, OK
cpd00024_e0	akg_e	akg_e	akg_e	akg	975	cpd00024_e0	2-Oxoglutarate		C5H4O5	-2	extracellular	C00026					According to Big ID database, OK
cpd00363_e0	etoh_e	etoh_e	etoh_e	etoh	976	cpd00363_e0	Ethanol		C2H6O	0	extracellular	C00469					According to Big ID database, OK
cpd00020_e0	pyr_e	pyr_e	pyr_e	pyr	977	cpd00020_e0	Pyruvate		C3H3O3	-1	extracellular	C00022					According to Big ID database, OK
cpd00102_e0	g3p_e	g3p_e	g3p_e	g3p	978	cpd00102_e0	Glyceraldehyde 3-phosphate		C3H6O6P	-1	extracellular	C00118,C00661					According to Big ID database, OK
cpd00290_e0	fdp_e	fdp_e	fdp_e	fdp	979	cpd00290_e0	D-Fructose 1,6-bisphosphate		C6H12O12P2	-2	extracellular	C00354					According to Big ID database, OK
cpd00996_e0	male_e	male_e	male_e	male	980	cpd00996_e0	Maleate		C4H2O4	-2	extracellular	C01384					According to Big ID database, OK
cpd00996_c0	male_c	male_c	male_c	male	981	cpd00996_c0	Maleate		C4H2O4	-2	cytosol	C01384					According to Big ID database, OK
cpd00386_e0	mal__D_e	mal__D_e	mal__D_e	mal-D	98	cpd00386_e0	D-Malate		C4H4O5	-2	extracellular	C00497					According to Big ID database, OK
cpd00386_c0	mal__D_c	mal__D_c	mal__D_c	mal-D	98	cpd00386_c0	D-Malate		C4H4O5	-2	cytosol	C00497					According to Big ID database, OK
None	mDB_mlo_e	mlo_e	mlo_e	mlo	984	None	Malonate		C3H4O4	0	extracellular	C00383					Manual, no BIGGID
None	mDB_mlo_c	mlo_c	mlo_c	mlo	985	None	Malonate		C3H4O4	0	cytosol	C00383					Manual, no BIGGID
cpd00260_e0	icit_e	icit_e	icit_e	icit	986	cpd00260_e0	Isocitrate		C6H5O7	-3	extracellular	C00311					According to Big ID database, OK
cpd00101_e0	r5p_e	r5p_e	r5p_e	r5p	987	cpd00101_e0	Alpha-D-Ribose 5-phosphate		C5H10O8P	-1	extracellular	C03736					According to Big ID database, OK
cpd00169_e0	3pg_e	3pg_e	3pg_e	3pg	988	cpd00169_e0	3-Phospho-D-glycerate		C3H5O7P	-2	extracellular	C00197,C00597					According to Big ID database, OK
cpd00059_e0	ascb__L_e	ascb__L_e	ascb__L_e	ascb__L	989	cpd00059_e0	L-Ascorbate		C6H7O6	-1	extracellular	C00072, C20364					According to Big ID database, OK
cpd14905_c0	ascb6p_c	ascb6p_c	ascb6p_c	ascb6p	990	cpd14905_c0	L-ascorbate-6-phosphate		C6H7O9P	-2	cytosol	C16186					According to Big ID database, OK
cpd00150_c0,cpd19012_c0	cyan_c	cyan_c	hcn_c	hcn	991	cpd00150_c0,cpd19012_c0	Hydrogen cyanide		CHN	0	cytosol	C00177, C01326,C18673					According to Big ID database, OK
None	mDB_3Aprop_c	3Aprop_c	3Aprop_c	3Aprop	992	None	3-Aminopropiononitrile		C3H6N2	0	cytosol	C05670					According to Big ID database, OK
cpd03646_c0	HC01700_c	HC01700_c	HC01700_c	HC01700	993	cpd03646_c0	Gamma-Glutamyl-3-aminopropiononitrile		C8H13N3O3	0	cytosol	C06114					According to Big ID database, OK
cpd01651_c0	HC00955_c	HC00955_c	HC00955_c	HC00955	994	cpd01651_c0	L-3-Cyanoalanine		C4H6N2O2	0	cytosol	C02512					According to Big ID database, OK
cpd03407_c0	HC01577_c	HC01577_c	HC01577_c	HC01577	995	cpd03407_c0	Gamma-Glutamyl-beta-cyanoalanine		C9H13N3O5	0	cytosol	C05711					According to Big ID database, OK
cpd03409_c0	acybut_c	acybut_c	acybut_c	acybut	996	cpd03409_c0	gamma-Amino-gamma-cyanobutanoate		C5H8N2O2	0	cytosol	C05715					According to Big ID database, OK
cpd03408_c0	aprop_c	aprop_c	aprop_c	aprop	997	cpd03408_c0	alpha-Aminopropiononitrile		C3H7N2	1	cytosol	C05714					According to Big ID database, OK
cpd00235_e0	man6p_e	m6p_e	m6p_e	m6p	998	cpd00235_e0	D-Mannose 6-phosphate		C6H11O9P	-2	extracellular	C00275					According to Big ID database, OK
cpd00235_c0	man6p_c	m6p_c	m6p_c	m6p	999	cpd00235_c0	D-Mannose 6-phosphate		C6H11O9P	-2	cytosol	C00276					According to Big ID database, OK
cpd00269_c0	2oxoadp_c	2oxoadp_c	2oxoadp_c	2oxoadp	1000	cpd00269_c0	2 Oxoadipate		C6H6O5	-2	cytosol	C00322					According to Big ID database, OK
cpd00413_c0	glutcoa_c	glutcoa_c	glutcoa_c	glutcoa	1001	cpd00413_c0	Glutaryl-CoA		C26H37N7O19P3S	0	cytosol	C00527					According to Big ID database, OK
cpd00269_e0	2oxoadp_e	2oxoadp_e	2oxoadp_e	2oxoadp	1002	cpd00269_e0	2 Oxoadipate		C6H6O5	-2	extracellular	C00322					According to Big ID database, OK
None	mDB_acn_c	acn_c	acn_c	acn	1003	None	Acetonitrile		CH3CN	0	cytosol	None					Manual, no BIGGID
None	mDB_acn_e	acn_e	acn_e	acn	1004	None	Acetonitrile		CH3CN	0	extracellular	None					Manual, no BIGGID

## Sheet: reactions
Rxn name	Previous names			Rxn description	Formula			gpr_compare	GPR_model		Subsystem	Reversible	LB	UB	Objective	Confidence Score	EC Number	Notes	References	KEGGRID	MassBalance			BIGG ID	From core model	From iAF1260	Notes	Rules	Remarks on Reversibility change					Note 25Apr 17	Note 28Aug17
rxn12008_c	rxn12008	rxn12008		rxn12008	ipdp_c + hepdp_c -> octdp_c + ppi_c	1		1	(CV_0847) or (CV_2691) or (CV_3954)	(CV_0847) or (CV_2691) or (CV_3954)	Biosynthesis of steroids	0	0	1000	0	1.5		R05611		R05611	''			None				(x(738)) | (x(317)) | (x(560))
rxn00541_c	rxn00541	rxn00541		L-Threonine acetaldehyde-lyase	thr__L_c -> acald_c + gly_c	1		1	(CV_4309)	(CV_4309)	Glycine, Serine and Threonine metabolism	0	0	1000	0	2.2		R00751		R00751	''			THRAi				(x(642))	As per Metacyc should be forward only
rxn00225_c	rxn00225	rxn00225		ATP acetate phosphotransferase	actp_c + adp_c -> h_c + atp_c + ac_c	1		1	(CV_3745) or (CV_1531)	(CV_3745) or (CV_1531)	Pyruvate metabolism	0	0	1000	0	2.2		R00315		R00315	''			ACKr	ACKr			(x(517)) | (x(112))	Only in backward direction according to Biocyc					reversible in iDB149
rxn01674_c	rxn01674	rxn01674		dCTP uridine 5-phosphotransferase	uri_c + dctp_c -> ump_c + dcdp_c	1		1	(CV_1085)	(CV_1085)	Pyrimidine metabolism	0	0	1000	0	1.5		R02327		R02327	''			DCTUP				(x(23))	As per Metacyc should be forward only
rxn10215_c	rxn10215	rxn10215		anteisoheptadecanoyl-1-acylglycerol-3-phosphate O-acyltransferase	cpd15672_c + fa12coa_c -> cpd15678_c + coa_c	1		1	(CV_4063) or (CV_1658)	(CV_4063) or (CV_1658)	Glycerolipid and Glycerophospholipid metabolism	0	0	1000	0	1.3		None		None	''							(x(584)) | (x(162))
rxn00802_c	rxn00802	rxn00802		N-L-Argininosuccinate arginie-lyase	argsuc_c -> fum_c + arg__L_c	1		1	(CV_0115)	(CV_0115)	Urea cycle and metabolism of amino groups	0	0	1000	0	1.3		R01086		R01086	''			ARGSL				(x(21))
rxn03638_c	rxn03638	rxn03638		Acetyl-CoA D-glucosamine-1-phosphate N-acetyltransferase	gam1p_c + accoa_c -> h_c + coa_c + acgam1p_c	1		1	(CV_3103 or CV_0674) and (CV_0674)	(CV_3103 or CV_0674) and (CV_0674)	Aminosugars metabolism	0	0	1000	0	1.5		R05332		R05332	''			G1PACT				(x(387) | x(719)) & (x(719))
rxn06078_c	rxn06078	rxn06078		O-Acetyl-L-homoserine acetate-lyase adding methanethiol	achms_c + tsul_c + trdrd_c -> ac_c + trdox_c + hcys__L_c + so3_c	1		1	(CV_1934) or (CV_2725)	(CV_1934) or (CV_2725)	Methionine metabolism	0	0	1000	0	1.5		R02026		R02026	''			AHAL				(x(204)) | (x(326))
rxn00868_c	rxn00868	rxn00868		Butanoyl-CoA acceptor 2 3-oxidoreductase	h_c + b2coa_c + nadh_c -> nad_c + btcoa_c	1		1	(CV_2723)	(CV_2723)	Butanoate metabolism	0	0	1000	0	1.1		R01171		R01171	''			ACOAD1				(x(325))
rxn01675_c	rxn01675	rxn01675		dTTP alpha-D-glucose-1-phosphate thymidylyltransferase	dttp_c + g1p_c -> ppi_c + dtdpglu_c	1		1	(CV_4012) or (CV_4226)	(CV_4012) or (CV_4226)	Streptomycin biosynthesis	0	0	1000	0	1.5		R02328		R02328	''			G1PTT				(x(572)) | (x(631))
rxn12636_c	rxn12636	rxn12636		aminopeptidase	h_c + h2o_c + met_L_ala__L_c <=> met__L_c + ala__L_c	1		1	(CV_2397) or (CV_2334) or (CV_2914) or (CV_2694) or (CV_1176) or (CV_4047) or (CV_4047)	(CV_2397) or (CV_2334) or (CV_2914) or (CV_2694) or (CV_1176) or (CV_4047) or (CV_4047)	Recycling of Peptidoglycan Amino Acids	1	-1000	1000	0	1.3		None		None	''							(x(289)) | (x(276)) | (x(353)) | (x(319)) | (x(47)) | (x(579)) | (x(579))
rxn12644_c	rxn12644	rxn12644		aminopeptidase	h2o_c + ala_L_thr__L_c <=> thr__L_c + ala__L_c	1		1	(CV_2694) or (CV_4047) or (CV_1176) or (CV_4047) or (CV_2397) or (CV_2334) or (CV_2914)	(CV_2694) or (CV_4047) or (CV_1176) or (CV_4047) or (CV_2397) or (CV_2334) or (CV_2914)	Recycling of Peptidoglycan Amino Acids	1	-1000	1000	0	1.1		None		None	''							(x(319)) | (x(579)) | (x(47)) | (x(579)) | (x(289)) | (x(276)) | (x(353))
rxn05536_c	rxn05536	rxn05536		Dipeptide transport via ABC system met-ala	atp_c + h2o_c + met_L_ala__L_e -> h_c + adp_c + met_L_ala__L_c + pi_c	1		1	(CV_3936) or (CV_1097) or (CV_3426) or (CV_2688)	(CV_3936) or (CV_1097) or (CV_3426) or (CV_2688)	Transport via ABC	0	0	1000	0	1.3		None		None	''							(x(554)) | (x(25)) | (x(439)) | (x(316))
rxn03422_c	rxn03422	rxn03422		N-succinyl-L-glutamate 5-semialdehyde NAD oxidoreductase	h2o_c + nad_c + sucgsa_c -> 2 h_c + nadh_c + sucglu_c	1		1	(CV_1499)	(CV_1499)	Arginine and proline metabolism	0	0	1000	0	2.2		R05049		R05049	''			SGSAD				(x(105))
rxn06729_c	rxn06729	rxn06729		R-3-Hydroxytetradecanoly-acyl-carrier-protein UDP-N-acetyl-	3hmrsACP_c + uacgam_c -> ACP_c + u3aga_c	1		1	(CV_2208)	(CV_2208)	Lipopolysaccharide biosynthesis	0	0	1000	0	1.5		R04567		R04567	''			UAGAAT				(x(252))
rxn01387_c	rxn01387	rxn01387		Isocitrate NADP oxidoreductase decarboxylating	nadp_c + icit_c <=> h_c + mDB_oxasucc_c + nadph_c	1		1	(CV_3664)	(CV_3664)	TCA Cycle	1	-1000	1000	0	1.5		R01899		R01899	''			ICDHyr	ICDHyr			(x(491))	Only in forward direction according to Biocy					ICDHyr part 1
rxn05168_c	rxn05168	rxn05168		L-Valine-ABC transport	atp_c + h2o_c + val__L_e -> h_c + adp_c + pi_c + val__L_c	1		1	(CV_0405) or (CV_2481) or (CV_1503)	(CV_0405) or (CV_2481) or (CV_1503)	Transport via ABC	0	0	1000	0	1.3		None		None	''			VALabc				(x(581)) | (x(300)) | (x(107))
rxn05544_c	rxn05544	rxn05544		Dipeptide transport via ABC system ala-leu	atp_c + h2o_c + ala_L_leu__L_e -> h_c + adp_c + pi_c + ala_L_leu__L_c	1		1	(CV_3936) or (CV_1097) or (CV_3426) or (CV_2688)	(CV_3936) or (CV_1097) or (CV_3426) or (CV_2688)	Transport via ABC	0	0	1000	0	1.3		None		None	''							(x(554)) | (x(25)) | (x(439)) | (x(316))
rxn03061_c	rxn03061	rxn03061		2S 3R-3-Hydroxybutane-1 2 3-tricarboxylate hydro-lyase	micit_c <=> h2o_c + 2mcacn_c	1		1	(CV_1121)	(CV_1121)	Propanoate metabolism	1	-1000	1000	0	2.2		R04425		R04425	''			MICITDr				(x(32))
rxn05549_c	rxn05549	rxn05549		Deoxyribose transport via ABC system	atp_c + h2o_c + drib_e -> h_c + adp_c + pi_c + drib_c	1		1	(CV_3016 or CV_3015) and (CV_3017) and (CV_3018) and (CV_3019)	(CV_3016 or CV_3015) and (CV_3017) and (CV_3018) and (CV_3019)	Transport via ABC	0	0	1000	0	1.5		None		None	''							(x(360) | x(359)) & (x(361)) & (x(362)) & (x(363))
rxn05330_c	rxn05330	rxn05330		3R-3-Hydroxybutanoyl-acyl-carrier-protein hydro-lyase	3hhexACP_c -> h2o_c + thex2eACP_c	1		1	(CV_3950) or (CV_2207)	(CV_3950) or (CV_2207)	Fatty acid biosynthesis	0	0	1000	0	1.5		R04954		R04954	''			3HAD60				(x(559)) | (x(251))
rxn03910_c	rxn03910	rxn03910		2-Phospho-4-cytidine 5-diphospho-2-C-methyl-D-erythritol	2p4c2me_c -> 2mecdp_c + cmp_c	1		1	(CV_1259)	(CV_1259)	Terpenoid biosynthesis	0	0	1000	0	1.5		R05637		R05637	''			MECDPS				(x(58))
rxn03492_c	rxn03492	rxn03492		precorrin-6Y NADP oxidoreductase	nadp_c + pre6b_c <=> h_c + nadph_c + pre6a_c	1		1	(CV_1562)	(CV_1562)	Porphyrin and chlorophyll metabolism	1	-1000	1000	0	1.3		R05150		R05150	''			PC6AR				(x(122))
rxn05616_c	rxn05616	rxn05616		magnesium transport in/out via permease no H	mg2_c <=> mg2_e	1		1	(CV_1263)	(CV_1263)	Transport via permease	1	-1000	1000	0	1.3		None		None	''							(x(60))
rxn08527_c	rxn08527	rxn08527		fumarate reductase	fum_c + mql8_c <=> succ_c + mqn8_c	1		1	(CV_1067 or CV_3369) and (CV_1068 or CV_3368) or (CV_1066 and CV_1065 and CV_3366 and CV_3367) or (CV_1067 or CV_3369)	(CV_1067 or CV_3369) and (CV_1068 or CV_3368) or (CV_1066 and CV_1065 and CV_3366 and CV_3367) or (CV_1067 or CV_3369)	TCA Cycle	1	-1000	1000	0	1.3		None		None	''							(x(14) | x(423)) & (x(15) | x(422)) | (x(13) & x(12) & x(420) & x(421)) | (x(14) | x(423))
rxn12848_c	rxn12848	rxn12848		Gly-Cys ABC transporters	atp_c + h2o_c + gly_cys__L_e -> h_c + adp_c + pi_c + gly_cys__L_c	1		1	(CV_3936) or (CV_1097) or (CV_3426) or (CV_2688)	(CV_3936) or (CV_1097) or (CV_3426) or (CV_2688)	Transport via ABC	0	0	1000	0	1.3		None		None	''							(x(554)) | (x(25)) | (x(439)) | (x(316))
rxn00369_c	rxn00369	rxn00369		GTP cytidine 5-phosphotransferase	cytd_c + gtp_c <=> cmp_c + gdp_c	1		1	(CV_1085)	(CV_1085)	Pyrimidine metabolism	1	-1000	1000	0	1.5		R00517		R00517	''			CYTDK2				(x(23))
rxn02212_c	rxn02212	rxn02212		2-Dehydro-3-deoxy-D-arabino-heptonate 7-phosphate phosphate-lyase	2dda7p_c -> h_c + pi_c + 3dhq_c	1		1	(CV_2833) or (CV_0827)	(CV_2833) or (CV_0827)	Phenylalanine, Tyrosine and Tryptophan biosynthesis	0	0	1000	0	1.1		R03083		R03083	''			DHQS	DHQS			(x(346)) | (x(736))
rxn03419_c	rxn03419	rxn03419		Formamidopyrimidine nucleoside triphosphate 7 8-8 9-dihydrolase	h2o_c + cpd03518_c <=> h_c + cpd03519_c + for_c	1		1	(CV_1130) or (CV_2361)	(CV_1130) or (CV_2361)	Folate biosynthesis	1	-1000	1000	0	1.3		R05046		R05046	''			None				(x(36)) | (x(280))
rxn02160_c	rxn02160	rxn02160		L-Histidinol-phosphate phosphohydrolase	h2o_c + hisp_c -> h_c + pi_c + histd_c	1		1	(CV_1657)	(CV_1657)	Histidine metabolism	0	0	1000	0	1.3		R03013		R03013	''			HISTP				(x(161))
rxn10125_c	rxn10125	rxn10125		NADP transhydrogenase	nadh_c + nadp_c + 2 h_e -> 2 h_c + nad_c + nadph_c	1		1	(CV_0099) and (CV_0100)	(CV_0099) and (CV_0100)	Nicotinate and nicotinamide metabolism	0	0	1000	0	1.1		None		None	''			THD2	THD2			(x(752)) & (x(756))	As per Metacyc should be forward only, or else non zero flux in some rxns
rxn03052_c	rxn03052	rxn03052		5-Methyltetrahydropteroyltri-L-glutamate L-homocysteine	hcys__L_c + mhpglu_c <=> met__L_c + hpglu_c	1		1	(CV_3604)	(CV_3604)	Methionine metabolism	1	-1000	1000	0	1.5		R04405		R04405	''			MHPGLUT or MTHPTGHMr				(x(472))
rxn01923_c	rxn01923	rxn01923		2-Methylpropanoyl-CoA oxygen 2 3-oxidoreductase	2 ibcoa_c + o2_c -> 2 h2o_c + 2 2mp2coa_c	1		1	(CV_2723)	(CV_2723)	Valine, Leucine and Isoleucine degradation	0	0	1000	0	1.1		None		None	''							(x(325))
rxn00248_c	rxn00248	rxn00248		S-malate NAD oxidoreductase	nad_c + mal__L_c <=> h_c + nadh_c + oaa_c	1		1	(CV_1062)	(CV_1062)	TCA Cycle	1	-1000	1000	0	2.2		R00342		R00342	''			MDH	MDH			(x(11))
rxn00048_c	rxn00048	rxn00048		6 7-Dimethyl-8-1-D-ribityllumazine 6 7-dimethyl-8-1-D-ribityl	2 dmlz_c -> 4r5au_c + ribflv_c	1		1	(CV_2387) or (CV_4217)	(CV_2387) or (CV_4217)	Riboflavin metabolism	0	0	1000	0	2.2		R00066		R00066	''			RBFSb				(x(285)) | (x(630))
rxn03164_c	rxn03164	rxn03164		UDP-N-acetylmuramoyl-L-alanyl-D-glutamyl-meso-2 6-	atp_c + ugmd_c + alaala_c -> h_c + adp_c + pi_c + ugmda_c	1		1	(CV_4347)	(CV_4347)	Lysine Biosynthesis	0	0	1000	0	1.5		R04617		R04617	''			UGMDDS				(x(650))
rxn05298_c	rxn05298	rxn05298		GLUt4i	na1_e + glu__L_e -> na1_c + glu__L_c	1		1	(CV_3409) or (CV_1105)	(CV_3409) or (CV_1105)	Transport	0	0	1000	0	1.3		None		None	''			GLUt4				(x(430)) | (x(27))	Reversibility changed based on iAF1260
rxn01370_c	rxn01370	rxn01370		dGTP uridine 5-phosphotransferase	uri_c + dgtp_c -> ump_c + dgdp_c	1		1	(CV_1085)	(CV_1085)	Pyrimidine metabolism	0	0	1000	0	1.5		R01880		R01880	''			DGTUP				(x(23))	As per Metacyc should be forward only
rxn10148_c	rxn10148	rxn10148		Lysine/Cadaverine antiporter	h_e + lys__L_e + 15dap_c <=> h_c + lys__L_c + 15dap_e	1		1	(CV_3432)	(CV_3432)	Transport via antiport	1	-1000	1000	0	1		None		None	''							(x(443))
rxn01258_c	rxn01258	rxn01258		Chorismate hydroxymutase	chor_c -> ichor_c	1		1	(CV_1485)	(CV_1485)	Ubiquinone biosynthesis	0	0	1000	0	1.3		R01717		R01717	''			ICHORS				(x(100))
rxn05229_c	rxn05229	rxn05229		NCAIR synthetase and NCAIR mutase	atp_c + air_c + hco3_c -> h_c + adp_c + pi_c + 5aizc_c	1		1	(CV_0162 and CV_0161)	(CV_0162 and CV_0161)	Purine metabolism	0	0	1000	0	1.4		R07404		R07404	''			AIRC2				(x(116) & x(113))
rxn12637_c	rxn12637	rxn12637		aminopeptidase	h2o_c + gly_asp__L_c <=> gly_c + asp__L_c	1		1	(CV_2694) or (CV_4047) or (CV_1176) or (CV_4047) or (CV_2397) or (CV_2334) or (CV_2914)	(CV_2694) or (CV_4047) or (CV_1176) or (CV_4047) or (CV_2397) or (CV_2334) or (CV_2914)	Recycling of Peptidoglycan Amino Acids	1	-1000	1000	0	1.1		None		None	''							(x(319)) | (x(579)) | (x(47)) | (x(579)) | (x(289)) | (x(276)) | (x(353))
rxn07586_c	rxn07586	rxn07586		rxn07586	h2o_c + copre5_c <=> acald_c + h_c + codscl5b_c	1		1	(CV_1563)	(CV_1563)	Porphyrin and chlorophyll metabolism	1	-1000	1000	0	1.3		R07772		R07772	''			CODSCL5DA				(x(123))
rxn05054_c	rxn05054	rxn05054		adenosylcobyric acid R-1-aminopropan-2-ol ligase ADP-forming	atp_c + adcobhex_c + appl_c -> h_c + adp_c + pi_c + adocbi_c	1		1	(CV_1575) or (CV_1002)	(CV_1575) or (CV_1002)	Porphyrin and chlorophyll metabolism	0	0	1000	0	1.5		R07302		R07302	''			None				(x(132)) | (x(4))	Reversibility changed based on iAF1260
rxn00902_c	rxn00902	rxn00902		3-Carboxy-3-hydroxy-4-methylpentanoate 3-methyl-2-oxobutanoate-lyase	accoa_c + h2o_c + 3mob_c -> h_c + coa_c + 3c3hmp_c	1		1	(CV_0595)	(CV_0595)	Pyruvate metabolism	0	0	1000	0	1.5		R01213		R01213	''			IPPS				(x(695))
rxn00952_c	rxn00952	rxn00952		O-Acetyl-L-homoserine acetate-lyase adding methanethiol	achms_c + h2s_c -> h_c + ac_c + hcys__L_c	1		1	(CV_1934) or (CV_2725)	(CV_1934) or (CV_2725)	Methionine metabolism	0	0	1000	0	1.5		R01287		R01287	''			AHSERL2				(x(204)) | (x(326))
rxn00503_c	rxn00503	rxn00503		L-1-Pyrroline-5-carboxylate NAD oxidoreductase	2 h2o_c + nad_c + 1pyr5c_c <=> h_c + nadh_c + glu__L_c	1		1	(CV_1538)	(CV_1538)	Glutamate metabolism	1	-1000	1000	0	1.5		R00707		R00707	''			P5CD				(x(114))
rxn10266_c	rxn10266	rxn10266		anteisoheptadecanoyl-Phosphatidylglycerophosphate phosphohydrolase	h2o_c + cpd15717_c -> h_c + pi_c + cpd15723_c	1		1	(CV_2393)	(CV_2393)	Glycerolipid and Glycerophospholipid metabolism	0	0	1000	0	1.3		None		None	''							(x(288))
rxn03909_c	rxn03909	rxn03909		1-Deoxy-D-xylulose-5-phosphate pyruvate-lyase carboxylating	h_c + g3p_c + pyr_c -> co2_c + dxyl5p_c	1		1	(CV_2692)	(CV_2692)	Terpenoid biosynthesis	0	0	1000	0	1.5		R05636		R05636	''			DXPS				(x(318))
rxn05328_c	rxn05328	rxn05328		Hexadecanoyl-acyl-carrier protein malonyl-CoA	h_c + nadh_c + tpalm2eACP_c -> nad_c + cpd11476_c	1		1	(CV_1583) or (CV_3743)	(CV_1583) or (CV_3743)	Fatty acid biosynthesis	0	0	1000	0	2.2		R04969		R04969	''			None				(x(134)) | (x(516))
rxn02056_c	rxn02056	rxn02056		S-Adenosyl-L-methionine uroporphyrin-III C-methyltransferase	scl_c + fe2_c -> 2 h_c + sheme_c	1		1	(CV_0813)	(CV_0813)	Porphyrin and chlorophyll metabolism	0	0	1000	0	1.5		R02864		R02864	''			SHCHF				(x(731))
rxn05372_c	rxn05372	rxn05372		10-methyl-3-oxo-dodecanoyl-ACP NADP oxidoreductase	h_c + nadph_c + cpd11508_c -> nadp_c + cpd11509_c	1		1	(CV_3414) or (CV_3947) or (CV_2707) or (CV_2258) or (CV_1046) or (CV_3576) or (CV_1546) or (CV_3406)	(CV_3414) or (CV_3947) or (CV_2707) or (CV_2258) or (CV_1046) or (CV_3576) or (CV_1546) or (CV_3406)	Fatty acid biosynthesis	0	0	1000	0	1.1		None		None	''							(x(433)) | (x(556)) | (x(320)) | (x(260)) | (x(9)) | (x(468)) | (x(117)) | (x(428))
rxn00459_c	rxn00459	rxn00459		2-Phospho-D-glycerate hydro-lyase	2pg_c <=> h2o_c + pep_c	1		1	(CV_3459)	(CV_3459)	Glycolysis/Gluconeogenesis	1	-1000	1000	0	2.2		R00658		R00658	''			ENO	ENO			(x(448))
rxn00405_c	rxn00405	rxn00405		L-Arginine carboxy-lyase	h_c + arg__L_c -> co2_c + agm_c	1		1	(CV_2876) or (CV_1992) or (CV_4040)	(CV_2876) or (CV_1992) or (CV_4040)	Urea cycle and metabolism of amino groups	0	0	1000	0	1.3		R00566		R00566	''			ARGDC				(x(348)) | (x(212)) | (x(577))
rxn10259_c	rxn10259	rxn10259		isoheptadecanoyl-CDPdiacylglycerol sn-glycerol-3-phosphate 3-phosphatidyltransferase	glyc3p_c + cpd15683_c -> cmp_c + cpd15716_c	1		1	(CV_1306)	(CV_1306)	Glycerolipid and Glycerophospholipid metabolism	0	0	1000	0	2.2		None		None	''							(x(68))
rxn00929_c	rxn00929	rxn00929		L-Proline NAD 5-oxidoreductase	h_c + nadh_c + 1pyr5c_c -> nad_c + pro__L_c	1		1	(CV_0177)	(CV_0177)	Arginine and proline metabolism	0	0	1000	0	1.5		R01248		R01248	''			PRO1x				(x(166))	Only in backward direction according to Metacyc
rxn05316_c	rxn05316	rxn05316		INSt2r	h_e + ins_e <=> h_c + ins_c	1		1	(CV_2040) or (CV_1931)	(CV_2040) or (CV_1931)	Transport	1	-1000	1000	0	1.3		None		None	''			INSt2				(x(222)) | (x(203))
rxn08311_c	rxn08311	rxn08311		CDP-diacylglycerol synthetase n-C18 0	ctp_c + pa180_c -> ppi_c + cdpdodecg_c	1		1	(CV_2201)	(CV_2201)	Glycerolipid and Glycerophospholipid metabolism	0	0	1000	0	1.3		None		None	''							(x(248))
rxn01492_c	rxn01492	rxn01492		ATP D-fructose-1-phosphate 6-phosphotransferase	atp_c + f1p_c -> adp_c + fdp_c	1		1	(CV_3053)	(CV_3053)	Fructose and Mannose metabolism	0	0	1000	0	1.3		R02071		R02071	''			None				(x(373))	Reversibility changed based on iAF1260
rxn01101_c	rxn01101	rxn01101		3-Phospho-D-glycerate NAD 2-oxidoreductase	nad_c + 3pg_c -> h_c + nadh_c + 3php_c	1		1	(CV_3789) or (CV_1724)	(CV_3789) or (CV_1724)	Glycine, Serine and Threonine metabolism	0	0	1000	0	1.3		R01513		R01513	''			PGCD				(x(533)) | (x(171))	As per Metacyc should be forward only
rxn00302_c	rxn00302	rxn00302		GTP 7 8-8 9-dihydrolase	h2o_c + gtp_c -> cpd03518_c	1		1	(CV_1130) or (CV_2361)	(CV_1130) or (CV_2361)	Folate biosynthesis	0	0	1000	0	1.3		R00428		R00428	''			None				(x(36)) | (x(280))
rxn05315_c	rxn05315	rxn05315		ZN2t4	h_e + k_e + zn2_c <=> h_c + k_c + zn2_e	1		1	(CV_3677)	(CV_3677)	Transport	1	-1000	1000	0	1.3		None		None	''			ZN2t4				(x(495))
rxn05145_c	rxn05145	rxn05145		Orthophosphate-ABC transport	atp_c + h2o_c + pi_e -> h_c + adp_c + 2 pi_c	1		1	(CV_0998) and (CV_0938) and (CV_0999) and (CV_0937)	(CV_0998) and (CV_0938) and (CV_0999) and (CV_0937)	Transport via ABC	0	0	1000	0	1.5		None		None	''							(x(754)) & (x(758)) & (x(755)) & (x(757))
rxn05341_c	rxn05341	rxn05341		3R-3-Hydroxyoctanoyl-acyl-carrier-protein NADP oxidoreductase	h_c + nadph_c + 3ooctACP_c -> nadp_c + 3hoctACP_c	1		1	(CV_3414) or (CV_3947) or (CV_2707) or (CV_2258) or (CV_1046) or (CV_3576) or (CV_1546) or (CV_3406)	(CV_3414) or (CV_3947) or (CV_2707) or (CV_2258) or (CV_1046) or (CV_3576) or (CV_1546) or (CV_3406)	Fatty acid biosynthesis	0	0	1000	0	1.5		R04536		R04536	''			3OAR80				(x(433)) | (x(556)) | (x(320)) | (x(260)) | (x(9)) | (x(468)) | (x(117)) | (x(428))
rxn02944_c	rxn02944	rxn02944		N2-succinyl-L-ornithine 2-oxoglutarate 5-aminotransferase	akg_c + sucorn_c <=> sucgsa_c + glu__L_c	1		1	(CV_1496)	(CV_1496)	Arginine and proline metabolism	1	-1000	1000	0	1.1		R04217		R04217	''			SOTA				(x(102))
rxn02331_c	rxn02331	rxn02331		2-Dehydro-3-deoxy-D-octonate-8-phosphate	h2o_c + pep_c + ara5p_c -> h_c + pi_c + kdo8p_c	1		1	(CV_2747)	(CV_2747)	Lipopolysaccharide biosynthesis	0	0	1000	0	1.5		R03254		R03254	''			KDOPS				(x(329))
rxn05460_c	rxn05460	rxn05460		3-Oxooctodecanoyl-ACP malonyl-acyl-carrier-protein C-acyltransferase decarboxylating	h_c + cpd11476_c + malACP_c -> co2_c + ACP_c + cpd11570_c	1		1	(CV_3412 or CV_3948 or CV_1541 or CV_3949) and (CV_3416 or CV_1096 or CV_0805)	(CV_3412 or CV_3948 or CV_1541 or CV_3949) and (CV_3416 or CV_1096 or CV_0805)	Fatty acid biosynthesis	0	0	1000	0	1.3		R07762		R07762	''			None				(x(432) | x(557) | x(115) | x(558)) & (x(435) | x(24) | x(730))
rxn04139_c	rxn04139	rxn04139		2-Octaprenyl-3-methyl-6-methoxy-1 4-benzoquinone NADPH2 oxygen	nadph_c + o2_c + 2ommb_c -> h2o_c + nadp_c + cpd03449_c	1		1	(CV_1132) or (CV_3120)	(CV_1132) or (CV_3120)	Ubiquinone biosynthesis	0	0	1000	0	1.1		R06146		R06146	''			None				(x(37)) | (x(388))
rxn03241_c	rxn03241	rxn03241		S-3-Hydroxytetradecanoyl-CoA hydro-lyase	3htdcoa_c <=> h2o_c + td2coa_c	1		1	(CV_2720) or (CV_1553) or (CV_2485)	(CV_2720) or (CV_1553) or (CV_2485)	Fatty acid metabolism	1	-1000	1000	0	1.1		R04740		R04740	''			ECOAH6				(x(323)) | (x(118)) | (x(302))
rxn01706_c	rxn01706	rxn01706		dUTP cytidine 5-phosphotransferase	cytd_c + dutp_c -> cmp_c + dudp_c	1		1	(CV_1085)	(CV_1085)	Pyrimidine metabolism	0	0	1000	0	1.5		R02372		R02372	''			DUTCP				(x(23))	As per Metacyc should be forward only
rxn02937_c	rxn02937	rxn02937		2-Formamido-N1-5-phosphoribosylacetamidine cyclo-ligase	atp_c + fpram_c -> h_c + adp_c + pi_c + air_c	1		1	(CV_3615)	(CV_3615)	Purine metabolism	0	0	1000	0	1.5		R04208		R04208	''			PRAIS				(x(476))
rxn00649_c	rxn00649	rxn00649		O3-Acetyl-L-serine acetate-lyase adding hydrogen sulfide	h2s_c + acser_c -> h_c + ac_c + cys__L_c	1		1	(CV_3025) or (CV_3597) or (CV_3561)	(CV_3025) or (CV_3597) or (CV_3561)	Cysteine and Methionine metabolism	0	0	1000	0	1.5		R00897		R00897	''			CYSS				(x(365)) | (x(471)) | (x(462))
rxn10806_c	rxn10806	rxn10806		cytochrome oxidase bd menaquinol-8 2 protons	2 h_c + mql8_c + 0.5 o2_c -> h2o_c + mqn8_c + 2 h_e	1		1	(CV_3658) or (CV_3993) or (CV_3996) or (CV_3657) or (CV_3994) or (CV_3995) or (CV_4007) or (CV_1065) or (CV_4008)	(CV_3658) or (CV_3993) or (CV_3996) or (CV_3657) or (CV_3994) or (CV_3995) or (CV_4007) or (CV_1065) or (CV_4008)	Oxidative phosphorylation	0	0	1000	0	1.5		None		None	''							(x(489)) | (x(563)) | (x(566)) | (x(488)) | (x(564)) | (x(565)) | (x(568)) | (x(12)) | (x(569))
rxn05579_c	rxn05579	rxn05579		betaine glycine betaine transport in/out via proton symport	h_e + glyb_e <=> h_c + glyb_c	1		1	(CV_4302)	(CV_4302)	Transport via Proton Symport	1	-1000	1000	0	1.3		None		None	''							(x(641))
rxn12851_c	rxn12851	rxn12851		Gly-Try ABC transporters	atp_c + h2o_c + gly_tyr__L_e -> h_c + adp_c + pi_c + gly_tyr__L_c	1		1	(CV_3936) or (CV_1097) or (CV_3426) or (CV_2688)	(CV_3936) or (CV_1097) or (CV_3426) or (CV_2688)	Transport via ABC	0	0	1000	0	1.3		None		None	''							(x(554)) | (x(25)) | (x(439)) | (x(316))
rxn05153_c	rxn05153	rxn05153		Sulfate-ABC transport	atp_c + h2o_c + so4_e -> h_c + adp_c + pi_c + so4_c	1		1	(CV_1829) and (CV_1828) and (CV_1830)	(CV_1829) and (CV_1828) and (CV_1830)	Transport via ABC	0	0	1000	0	1		None		None	''							(x(190)) & (x(188)) & (x(191))
rxn01446_c	rxn01446	rxn01446		Deoxyguanosine orthophosphate ribosyltransferase	h_c + pi_c + dgsn_c <=> gua_c + 2dr1p_c	1		1	(CV_4097) or (CV_3698)	(CV_4097) or (CV_3698)	Purine metabolism	1	-1000	1000	0	1.5		R01969		R01969	''			PUNP4				(x(585)) | (x(505))
rxn05346_c	rxn05346	rxn05346		butyryl-acyl-carrier protein malonyl-acyl-carrier-protein	h_c + malACP_c + butACP_c -> co2_c + ACP_c + 3ohexACP_c	1		1	(CV_3412 or CV_3948 or CV_1541 or CV_3949) and (CV_3416 or CV_1096 or CV_0805)	(CV_3412 or CV_3948 or CV_1541 or CV_3949) and (CV_3416 or CV_1096 or CV_0805)	Fatty acid biosynthesis	0	0	1000	0	1.3		R04952		R04952	''			3OAS60				(x(432) | x(557) | x(115) | x(558)) & (x(435) | x(24) | x(730))
rxn00558_c	rxn00558	rxn00558		D-Glucose-6-phosphate ketol-isomerase	g6p_c -> f6p_c	1		1	(CV_0149) or (CV_2369)	(CV_0149) or (CV_2369)	Glycolysis/Gluconeogenesis	0	0	1000	0	1.5		R02740,R00771		R02740,R00771	''			PGI	PGI			(x(84)) | (x(282))	As per Metacyc should be forward only
rxn05335_c	rxn05335	rxn05335		3R-3-Hydroxypalmitoyl-acyl-carrier-protein hydro-lyase	3hmrsACP_c <=> h2o_c + tmrs2eACP_c	1		1	(CV_3950) or (CV_2207)	(CV_3950) or (CV_2207)	Fatty acid biosynthesis	1	-1000	1000	0	1.5		R04568		R04568	''			3HAD140				(x(559)) | (x(251))
rxn10122_c	rxn10122	rxn10122		NADH dehydrogenase ubiquinone-8 & 3.5 protons	4.5 h_c + nadh_c + q8_c <=> nad_c + 3.5 h_e + q8h2_c	1		1	(CV_0953) and (CV_0947) and (CV_0945) and (CV_0946) and (CV_0948) and (CV_0949) and (CV_0942) and (CV_0951) and ((CV_0633) or (CV_0941)) and (CV_0944) and (CV_0952) and (CV_0954) and (CV_0943) and (CV_0950)	(CV_0953) and (CV_0947) and (CV_0945) and (CV_0946) and (CV_0948) and (CV_0949) and (CV_0942) and (CV_0951) and ((CV_0633) or (CV_0941)) and (CV_0944) and (CV_0952) and (CV_0954) and (CV_0943) and (CV_0950)	Oxidative phosphorylation	1	-1000	1000	0	1.1		None		None	''			NADH16 is it				(x(772)) & (x(766)) & (x(764)) & (x(765)) & (x(767)) & (x(768)) & (x(761)) & (x(770)) & (x(709)) | (x(760)) & (x(763)) & (x(771)) & (x(773)) & (x(762)) & (x(769))						irrev in iDB
rxn00187_c	rxn00187	rxn00187		L-Glutamate ammonia ligase ADP-forming	atp_c + glu__L_c + nh4_c -> h_c + adp_c + pi_c + gln__L_c	1		1	(CV_3589 or CV_1448 or CV_2024 or CV_4298)	(CV_3589 or CV_1448 or CV_2024 or CV_4298)	Glutamate metabolism	0	0	1000	0	2.2		R00253		R00253	''			GLNS	GLNS			(x(470) | x(844) | x(845) | x(849))	Only in forward direction according to Biocy					add new genes
rxn05305_c	rxn05305	rxn05305		LYSt3r	h_e + lys__L_c -> h_c + lys__L_e	1		1	(CV_1901) or (CV_1936)	(CV_1901) or (CV_1936)	Transport via Proton Symport	0	0	1000	0	1		None		None	''			LYSt3r				(x(197)) | (x(206))	Only forward as per SEED
rxn00737_c	rxn00737	rxn00737		L-threonine ammonia-lyase	thr__L_c -> nh4_c + 2obut_c	1		1	(CV_3250) or (CV_3093)	(CV_3250) or (CV_3093)	Valine, Leucine and Isoleucine Biosynthesis	0	0	1000	0	1.5		R00996		R00996	''			None				(x(404)) | (x(386))
rxn01200_c	rxn01200	rxn01200		Sedoheptulose-7-phosphate D-glyceraldehyde-3-phosphate	g3p_c + s7p_c -> xu5p__D_c + r5p_c	1		1	(CV_2257) or (CV_0191)	(CV_2257) or (CV_0191)	Pentose Phosphate Pathway	0	0	1000	0	2.2		R01641		R01641	''			TKT1	TKT1			(x(259)) | (x(192))	Only in backward direction according to Biocyc					reversible in iDB149
rxn05232_c	rxn05232	rxn05232		Ribonucleotide reductase ATP	atp_c + trdrd_c -> h2o_c + trdox_c + datp_c	1		1	(CV_2412)	(CV_2412)	Purine metabolism	0	0	1000	0	1.3		R02014		R02014	''			RNTR1				(x(291))
rxn03841_c	rxn03841	rxn03841		4-amino-4-deoxychorismate pyruvate-lyase	4adcho_c -> h_c + pyr_c + 4abz_c	1		1	(CV_3410)	(CV_3410)	Folate biosynthesis	0	0	1000	0	1.3		R05553		R05553	''			ADCL				(x(431))
rxn00193_c	rxn00193	rxn00193		L-Glutamate racemase	glu__L_c -> glu__D_c	1		1	(CV_1203)	(CV_1203)	D-Glutamine and D-glutamate metabolism	0	0	1000	0	1.3		R00260		R00260	''			GLUR				(x(53))
rxn05561_c	rxn05561	rxn05561		fumarate transport in/out via proton symport	h_e + fum_e -> h_c + fum_c	1		1	(CV_1370) or (CV_0919 and CV_0918 and CV_0917)	(CV_1370) or (CV_0919 and CV_0918 and CV_0917)	Transport via Proton Symport	0	0	1000	0	1		None		None	''							(x(80)) | (x(750) & x(836) & x(837))	Only forward as per literature
rxn03481_c	rxn03481	rxn03481		Arbutin 6-phosphate glucohydrolase	h2o_c + arbt6p_c -> g6p_B_c + hqn_c	1		1	(CV_1272)	(CV_1272)	Glycolysis/Gluconeogenesis	0	0	1000	0	1.5		R05133		R05133	''			None				(x(63))
rxn05175_c	rxn05175	rxn05175		Spermidine-ABC transport	atp_c + h2o_c + spmd_e -> h_c + adp_c + pi_c + spmd_c	1		1	(CV_0925 or CV_4213 or CV_4099) and (CV_4101) and (CV_1678 or CV_4102) and (CV_4100)	(CV_0925 or CV_4213 or CV_4099) and (CV_4101) and (CV_1678 or CV_4102) and (CV_4100)	Transport via ABC	0	0	1000	0	1		None		None	''							(x(751) | x(628) | x(586)) & (x(588)) & (x(163) | x(589)) & (x(587))
rxn05381_c	rxn05381	rxn05381		14-methyl-3-hydroxy-hexa-decanoyl-ACP hydro-lyase	cpd11517_c -> h2o_c + cpd11518_c	1		1	(CV_3950) or (CV_2207)	(CV_3950) or (CV_2207)	Fatty acid biosynthesis	0	0	1000	0	1.5		None		None	''							(x(559)) | (x(251))
rxn00604_c	rxn00604	rxn00604		D-Glucose-6-phosphate NADP 1-oxoreductase	nadp_c + g6p_c -> h_c + nadph_c + 6pgl_c	1		1	(CV_0145)	(CV_0145)	Pentose Phosphate Pathway	0	0	1000	0	1.1		R00835		R00835	''			G6PDH2r	G6PDH2r			(x(79))	As per Metacyc should be forward only
rxn05386_c	rxn05386	rxn05386		5-methyl-3-hydroxy-hexanoyl-ACP hydro-lyase	cpd11522_c <=> h2o_c + cpd11523_c	1		1	(CV_3950) or (CV_2207)	(CV_3950) or (CV_2207)	Fatty acid biosynthesis	1	-1000	1000	0	1.5		None		None	''							(x(559)) | (x(251))
rxn12844_c	rxn12844	rxn12844		Gly-Cys aminopeptidase	h2o_c + gly_cys__L_c <=> gly_c + cys__L_c	1		1	(CV_2694) or (CV_4047) or (CV_1176) or (CV_4047) or (CV_2397) or (CV_2334) or (CV_2914)	(CV_2694) or (CV_4047) or (CV_1176) or (CV_4047) or (CV_2397) or (CV_2334) or (CV_2914)	Glutathione metabolism	1	-1000	1000	0	1.4		R00899		R00899	''			AMPTASECG				(x(319)) | (x(579)) | (x(47)) | (x(579)) | (x(289)) | (x(276)) | (x(353))
rxn01678_c	rxn01678	rxn01678		ATP nucleoside-diphosphate phosphatransferase	atp_c + dudp_c -> adp_c + dutp_c	1		1	(CV_3542)	(CV_3542)	Pyrimidine metabolism	0	0	1000	0	1.5		R02331		R02331	''			NDPK6				(x(457))	To avoid futile cycles
rxn01332_c	rxn01332	rxn01332		Phosphoenolpyruvate D-erythrose-4-phosphate	h2o_c + pep_c + e4p_c -> h_c + pi_c + 2dda7p_c	1		1	(CV_2358) and (CV_1481 or CV_0173)	(CV_2358) and (CV_1481 or CV_0173)	Phenylalanine, Tyrosine and Tryptophan biosynthesis	0	0	1000	0	1.5		R01826		R01826	''			DDPA	DDPA			(x(279)) & (x(99) | x(156))
rxn10060_c	rxn10060	rxn10060		NAD kinase dTTP	nad_c + dttp_c <=> nadp_c + dtdp_c	1		1	(CV_2322)	(CV_2322)	Nicotinate and nicotinamide metabolism	1	-1000	1000	0	1.3		None		None	''							(x(273))
rxn06377_c	rxn06377	rxn06377		glycine lipoylprotein oxidoreductase decarboxylating and	gly_c + h_c + lpro_c -> co2_c + alpro_c	1		1	(CV_3429)	(CV_3429)	Glycine, Serine and Threonine metabolism	0	0	1000	0	2.2		R03425		R03425	''			GCCa				(x(440))
rxn02933_c	rxn02933	rxn02933		2S 3S-3-hydroxy-2-methylbutanoyl-CoA NAD oxidoreductase	h_c + nadh_c + 2maacoa_c -> nad_c + 3hmbcoa_c	1		1	(CV_2720)	(CV_2720)	Valine, Leucine and Isoleucine degradation	0	0	1000	0	2.2		R04203		R04203	''			HACD9				(x(323))
rxn08202_c	rxn08202	rxn08202		CDP-Diacylglycerol pyrophostatase n-C16 0	h2o_c + cdpdhdecg_c -> cmp_c + pa160_c	1		1	(CV_4315)	(CV_4315)	Glycerolipid and Glycerophospholipid metabolism	0	0	1000	0	1.3		None		None	''							(x(643))
rxn00100_c	rxn00100	rxn00100		ATP dephospho-CoA 3-phosphotransferase	atp_c + dpcoa_c -> adp_c + coa_c	1		1	(CV_3825)	(CV_3825)	Pantothenate and CoA biosynthesis	0	0	1000	0	1.3		R00130		R00130	''			DPCOAK				(x(539))
rxn01018_c	rxn01018	rxn01018		Carbamoyl-phosphate L-aspartate carbamoyltransferase	asp__L_c + cbp_c -> 2 h_c + pi_c + cbasp_c	1		1	(CV_0370) or (CV_0369)	(CV_0370) or (CV_0369)	Pyrimidine metabolism	0	0	1000	0	1.5		R01397		R01397	''			ASPCT				(x(500)) | (x(497))
rxn00806_c	rxn00806	rxn00806		L-Leucine 2-oxoglutarate aminotransferase	glu__L_c + 4mop_c -> akg_c + leu__L_c	1		1	(CV_2094)	(CV_2094)	Valine, Leucine and Isoleucine Biosynthesis	0	0	1000	0	1.5		R01090		R01090	''			LEUTA				(x(235))
rxn02834_c	rxn02834	rxn02834		Phosphoribosyl-ATP pyrophosphohydrolase	h2o_c + prbatp_c -> ppi_c + prbamp_c	1		1	(CV_0620) and (CV_0621)	(CV_0620) and (CV_0621)	Histidine metabolism	0	0	1000	0	4.2		R04035		R04035	''			PRATPP				(x(706)) & (x(707))
rxn10121_c	rxn10121	rxn10121		Nitrate reductase Menaquinol-8	2 h_c + mql8_c + no3_c -> h2o_c + mqn8_c + 2 h_e + no2_c	1		1	(CV_2543 and CV_2542 and CV_2540 and CV_2541) or (CV_2229)	(CV_2543 and CV_2542 and CV_2540 and CV_2541) or (CV_2229)	Nitrate and nitrite ammonification	0	0	1000	0	1.5		None		None	''							(x(309) & x(308) & x(306) & x(307)) | (x(255))	As per Metacyc should be forward only
rxn00656_c	rxn00656	rxn00656		L-Alanine 3-oxopropanoate aminotransferase	ala__L_c + msa_c <=> pyr_c + ala_B_c	1		1	(CV_1436) or (CV_2025)	(CV_1436) or (CV_2025)	Propanoate metabolism	1	-1000	1000	0	4.2		R00907		R00907	''			APATr				(x(93)) | (x(219))
rxn05334_c	rxn05334	rxn05334		3R-3-Hydroxybutanoyl-acyl-carrier-protein hydro-lyase	3hoctACP_c -> h2o_c + toct2eACP_c	1		1	(CV_3950) or (CV_2207)	(CV_3950) or (CV_2207)	Fatty acid biosynthesis	0	0	1000	0	1.5		R04537		R04537	''			3HAD80				(x(559)) | (x(251))
rxn02341_c	rxn02341	rxn02341		N-R-4-Phosphopantothenoyl-L-cysteine carboxy-lyase	h_c + 4ppcys_c -> co2_c + pan4p_c	1		1	(CV_3080) and (CV_3080)	(CV_3080) and (CV_3080)	Pantothenate and CoA biosynthesis	0	0	1000	0	1.4		R03269		R03269	''			PPCDC				(x(379)) & (x(379))
rxn09310_c	rxn09310	rxn09310		thiazole phosphate synthesis	atp_c + dxyl5p_c + cys__L_c + tyr__L_c -> ppi_c + co2_c + h2o_c + ala__L_c + 4hba_c + amp_c + 4mpetz_c	1		1	(CV_4258) and (CV_3766) and (CV_3767)	(CV_4258) and (CV_3766) and (CV_3767)	Alanine, Aspartate and Glutamine metabolism/Nitrogen metabolism	0	0	1000	0	1		R07464		R07464	''			None				(x(635)) & (x(523)) & (x(524))
rxn03175_c	rxn03175	rxn03175		N-5-Phospho-D-ribosylformimino-5-amino-1-	prfp_c -> prlp_c	1		1	(CV_0617)	(CV_0617)	Histidine metabolism	0	0	1000	0	1.5		R04640		R04640	''			PRMICI				(x(704))
rxn00157_c	rxn00157	rxn00157		Acetyl-CoA formate C-acetyltransferase	accoa_c + for_c <=> coa_c + pyr_c	1		1	(CV_1412) or (CV_1413)	(CV_1412) or (CV_1413)	Pyruvate metabolism	1	-1000	1000	0	1.4		R00212		R00212	''			PFL				(x(88)) | (x(89))
rxn10152_c	rxn10152	rxn10152		Fumarate transport via proton symport 2 H	2 h_e + fum_e -> 2 h_c + fum_c	1		1	(CV_3707)	(CV_3707)	Transport via Proton Symport	0	0	1000	0	1.3		None		None	''			FUMt2_2	FUMt2_2			(x(510))	Reversibility changed based on iAF1260
rxn10945_c	rxn10945	rxn10945		Diffusion of L-proline	pro__L_e -> pro__L_c	1		1	(CV_2901)	(CV_2901)	Transport via diffusion	0	0	1000	0	1.5		None		None	''							(x(351))	Only forward as per SEED
rxn01518_c	rxn01518	rxn01518		ATP deoxyuridine 5-phosphotransferase	atp_c + duri_c -> adp_c + dump_c	1		1	(CV_2342)	(CV_2342)	Pyrimidine metabolism	0	0	1000	0	1.5		R02099		R02099	''			DURIK1				(x(277))	Reversibility changed based on iAF1260
rxn05649_c	rxn05649	rxn05649		D-serine transport in/out via proton symport	h_e + ser__D_e <=> h_c + ser__D_c	1		1	(CV_1138)	(CV_1138)	Transport via Proton Symport	1	-1000	1000	0	1.5		None		None	''							(x(40))
rxn00786_c	rxn00786	rxn00786		D-Fructose-1 6-bisphosphate D-glyceraldehyde-3-phosphate-lyase	fdp_c <=> g3p_c + dhap_c	1		1	(CV_0187)	(CV_0187)	Glycolysis/Gluconeogenesis	1	-1000	1000	0	2.2		R01068,R01070		R01068,R01070	''			FBA	FBA			(x(183))
rxn05158_c	rxn05158	rxn05158		sn-Glycerol ABC transport	atp_c + h2o_c + glyc3p_e -> h_c + adp_c + pi_c + glyc3p_c	1		1	(CV_3654) or (CV_3655) or (CV_3656) or (CV_3653)	(CV_3654) or (CV_3655) or (CV_3656) or (CV_3653)	Transport via ABC	0	0	1000	0	1		None		None	''							(x(485)) | (x(486)) | (x(487)) | (x(484))
rxn00379_c	rxn00379	rxn00379		ATP sulfate adenylyltransferase	h_c + atp_c + so4_c -> ppi_c + aps_c	1		1	(CV_2306) or (CV_2307)	(CV_2306) or (CV_2307)	Sulfur metabolism	0	0	1000	0	1.5		R00529		R00529	''			SADT				(x(267)) | (x(268))	Reversibility changed based on iAF1260
rxn09674_c	rxn09674	rxn09674		L-lysine reversible transport via proton symport	h_e + lys__L_e <=> h_c + lys__L_c	1		1	(CV_2730)	(CV_2730)	Transport via Proton Symport	1	-1000	1000	0	1.3		None		None	''							(x(328))
rxn05164_c	rxn05164	rxn05164		L-Histidine-ABC transport	atp_c + h2o_c + his__L_e -> h_c + adp_c + pi_c + his__L_c	1		1	(CV_0852) or (CV_0854) or (CV_3087) or (CV_0855) or (CV_3086) or (CV_0853)	(CV_0852) or (CV_0854) or (CV_3087) or (CV_0855) or (CV_3086) or (CV_0853)	Transport via ABC	0	0	1000	0	1		None		None	''							(x(741)) | (x(744)) | (x(385)) | (x(745)) | (x(384)) | (x(743))
rxn12640_c	rxn12640	rxn12640		aminopeptidase	h2o_c + ala_L_glu__L_c <=> ala__L_c + glu__L_c	1		1	(CV_2694) or (CV_4047) or (CV_1176) or (CV_4047) or (CV_2397 or CV_2334) or (CV_2914)	(CV_2694) or (CV_4047) or (CV_1176) or (CV_4047) or (CV_2397 or CV_2334) or (CV_2914)	Recycling of Peptidoglycan Amino Acids	1	-1000	1000	0	1.1		None		None	''							(x(319)) | (x(579)) | (x(47)) | (x(579)) | (x(289) | x(276)) | (x(353))
rxn10206_c	rxn10206	rxn10206		anteisoheptadecanoyl-glycerol-3-phosphate O-acyltransferase	fa12coa_c + glyc3p_c -> cpd15672_c + coa_c	1		1	(CV_3688) and (CV_3417)	(CV_3688) and (CV_3417)	Glycerolipid and Glycerophospholipid metabolism	0	0	1000	0	1.5		None		None	''							(x(498)) & (x(436))
rxn05376_c	rxn05376	rxn05376		12-methyl-3-oxo-tetra-decanoyl-ACP NADP oxidoreductase	h_c + nadph_c + cpd11512_c -> nadp_c + cpd11513_c	1		1	(CV_3414) or (CV_3947) or (CV_2707) or (CV_2258) or (CV_1046) or (CV_3576) or (CV_1546) or (CV_3406)	(CV_3414) or (CV_3947) or (CV_2707) or (CV_2258) or (CV_1046) or (CV_3576) or (CV_1546) or (CV_3406)	Fatty acid biosynthesis	0	0	1000	0	1.1		None		None	''							(x(433)) | (x(556)) | (x(320)) | (x(260)) | (x(9)) | (x(468)) | (x(117)) | (x(428))
rxn05342_c	rxn05342	rxn05342		3R-3-Hydroxytetradecanoyl-acyl-carrier-protein NADP	h_c + nadph_c + 3omrsACP_c -> 3hmrsACP_c + nadp_c	1		1	(CV_3414) or (CV_3947) or (CV_2707) or (CV_2258) or (CV_1046) or (CV_3576) or (CV_1546) or (CV_3406)	(CV_3414) or (CV_3947) or (CV_2707) or (CV_2258) or (CV_1046) or (CV_3576) or (CV_1546) or (CV_3406)	Fatty acid biosynthesis	0	0	1000	0	1.4		R04566		R04566	''			3OAR140				(x(433)) | (x(556)) | (x(320)) | (x(260)) | (x(9)) | (x(468)) | (x(117)) | (x(428))
rxn06510_c	rxn06510	rxn06510		Lauroyl-CoA acetyl-CoA C-acyltransferase	accoa_c + ddcacoa_c <=> coa_c + 3otdcoa_c	1		1	(CV_2719) or (CV_2790)	(CV_2719) or (CV_2790)	Fatty acid metabolism	1	-1000	1000	0	2.2		R03858		R03858	''			ACACT6r				(x(322)) | (x(341))
rxn03511_c	rxn03511	rxn03511		ADP-D-glycero-D-manno-heptose 6-epimerase	adphep_DD_c -> adphep_LD_c	1		1	(CV_3038)	(CV_3038)	Lipopolysaccharide biosynthesis	0	0	1000	0	1.5		R05176		R05176	''			AGMHE				(x(367))
rxn02866_c	rxn02866	rxn02866		3-Methylbutanoyl-CoA acceptor 2 3-oxidoreductase	3mb2coa_c + fadh2_c -> ivcoa_c + fad_c	1		1	(CV_1766)	(CV_1766)	Valine, Leucine and Isoleucine degradation	0	0	1000	0	1.5		R04095		R04095	''			MBCOAi				(x(181))
rxn05733_c	rxn05733	rxn05733		cysteine synthase Thiosulfate	tsul_c + trdrd_c + acser_c -> ac_c + trdox_c + so3_c + cys__L_c	1		1	(CV_3597) or (CV_3561)	(CV_3597) or (CV_3561)	Cysteine and Methionine metabolism	0	0	1000	0	1.5		R04859		R04859	''			CYSS_trdrd				(x(471)) | (x(462))						But biggID in chloroplast
rxn05350_c	rxn05350	rxn05350		hexanoyl-acyl-carrier protein malonyl-acyl-carrier-protein	h_c + malACP_c + hexACP_c -> co2_c + ACP_c + 3ooctACP_c	1		1	(CV_3412 or CV_3948 or CV_1541 or CV_3949) and (CV_3416 or CV_1096 or CV_0805)	(CV_3412 or CV_3948 or CV_1541 or CV_3949) and (CV_3416 or CV_1096 or CV_0805)	Fatty acid biosynthesis	0	0	1000	0	1.3		R04957		R04957	''			3OAS80				(x(432) | x(557) | x(115) | x(558)) & (x(435) | x(24) | x(730))
rxn00262_c	rxn00262	rxn00262		L-Aspartic acid oxygen oxidoreductase deaminating	h2o_c + o2_c + asp__L_c -> oaa_c + nh4_c + h2o2_c	1		1	(CV_3930)	(CV_3930)	Alanine, Aspartate and Glutamine metabolism/Nitrogen metabolism	0	0	1000	0	1.5		R00357		R00357	''			None				(x(553))
rxn02404_c	rxn02404	rxn02404		3-Deoxy-D-manno-octulosonate-8-phosphate 8-phosphohydrolase	h2o_c + kdo8p_c -> h_c + pi_c + kdo_c	1		1	(CV_3328)	(CV_3328)	Lipopolysaccharide biosynthesis	0	0	1000	0	1.4		R03350		R03350	''			KDOPP				(x(413))
rxn10114_c	rxn10114	rxn10114		formate dehydrogenase quinone-8 2 protons	3 h_c + for_c + q8_c -> co2_c + 2 h_e + q8h2_c	1		1	(CV_3839) and (CV_3840) and (CV_3841)	(CV_3839) and (CV_3840) and (CV_3841)	Oxidative phosphorylation	0	0	1000	0	1.1		None		None	''							(x(541)) & (x(542)) & (x(543))
rxn00704_c	rxn00704	rxn00704		alpha-D-Glucose 1-phosphate 1 6-phosphomutase	g6p_c -> g1p_c	1		1	(CV_2172)	(CV_2172)	Glycolysis/Gluconeogenesis	0	0	1000	0	1.5		R00959,R08639		R00959,R08639	''			None				(x(240))
rxn00183_c	rxn00183	rxn00183		L-Glutamate 5-semialdehyde NAD oxidoreductase	h2o_c + nad_c + glu5sa_c -> 2 h_c + nadh_c + glu__L_c	1		1	(CV_1538)	(CV_1538)	Arginine and proline metabolism	0	0	1000	0	1.5		R00245		R00245	''			PUTA3				(x(114))
rxn00710_c	rxn00710	rxn00710		Orotidine-5-phosphate carboxy-lyase	h_c + orot5p_c -> ump_c + co2_c	1		1	(CV_3042)	(CV_3042)	Pyrimidine metabolism	0	0	1000	0	1.5		R00965		R00965	''			OMPDC				(x(369))
rxn05539_c	rxn05539	rxn05539		Dipeptide transport via ABC system cgly	atp_c + h2o_c + cgly_e -> h_c + adp_c + pi_c + cgly_c	1		1	(CV_3936) or (CV_1097) or (CV_3426) or (CV_2688)	(CV_3936) or (CV_1097) or (CV_3426) or (CV_2688)	Transport via ABC	0	0	1000	0	1.3		None		None	''							(x(554)) | (x(25)) | (x(439)) | (x(316))
rxn05437_c	rxn05437	rxn05437		12-methyl-trans-tetra-dec-2-enoyl-ACP NAD oxidoreductase A-specific	h_c + nadh_c + cpd11514_c -> nad_c + cpd11515_c	1		1	(CV_1583) or (CV_3743)	(CV_1583) or (CV_3743)	Fatty acid biosynthesis	0	0	1000	0	1.1		None		None	''							(x(134)) | (x(516))
rxn02775_c	rxn02775	rxn02775		S-Adenosyl-L-methionine precorrin-4 C20-methyltransferase	h_c + pre2_c + amet_c <=> ahcys_c + pre3a_c	1		1	(CV_1565)	(CV_1565)	Porphyrin and chlorophyll metabolism	1	-1000	1000	0	1.3		R03948		R03948	''			None				(x(125))
rxn01642_c	rxn01642	rxn01642		4-imidazolone-5-propanoate amidohydrolase	h2o_c + 4izp_c -> forglu_c	1		1	(CV_0321)	(CV_0321)	Histidine metabolism	0	0	1000	0	1.5		R02288		R02288	''			IZPN				(x(393))
rxn00545_c	rxn00545	rxn00545		ATP D-fructose-6-phosphate 1-phosphotransferase	atp_c + f6p_c -> adp_c + fdp_c	1		1	(CV_1745)	(CV_1745)	Glycolysis/Gluconeogenesis	0	0	1000	0	1.3		R00756,R04779		R00756,R04779	''			PFK	PFK			(x(173))	Reversibility changed based on iAF1260
rxn02897_c	rxn02897	rxn02897		Nicotinate-nucleotide dimethylbenzimidazole	dmbzid_c + nicrnt_c -> h_c + nac_c + 5prdmbz_c	1		1	(CV_0493)	(CV_0493)	Riboflavin metabolism	0	0	1000	0	1.5		R04148		R04148	''			NNDMBRT				(x(665))
rxn01649_c	rxn01649	rxn01649		Xanthosine orthophosphate ribosyltransferase	h_c + pi_c + xtsn_c -> r1p_c + xan_c	1		1	(CV_4097) or (CV_3698)	(CV_4097) or (CV_3698)	Purine metabolism	0	0	1000	0	1.5		R02297		R02297	''			PUNP7				(x(585)) | (x(505))	As per Metacyc should be forward only
rxn00330_c	rxn00330	rxn00330		L-Malate glyoxylate-lyase CoA-acetylating	accoa_c + h2o_c + glx_c -> h_c + coa_c + mal__L_c	1		1	(CV_3304)	(CV_3304)	Pyruvate metabolism	0	0	1000	0	2.2		R00472		R00472	''			MALS	MALS			(x(411))
rxn03916_c	rxn03916	rxn03916		D-glycero-D-manno-hepose 1-phosphate adenyltransferase	atp_c + gmhep1p_c -> ppi_c + adphep_DD_c	1		1	(CV_3040)	(CV_3040)	Lipopolysaccharide biosynthesis	0	0	1000	0	1.3		R05644		R05644	''			GMHEPAT				(x(368))
rxn08203_c	rxn08203	rxn08203		CDP-Diacylglycerol pyrophostatase n-C16 1	h2o_c + cdpdhdec9eg_c -> cmp_c + pa161_c	1		1	(CV_4315)	(CV_4315)	Glycerolipid and Glycerophospholipid metabolism	0	0	1000	0	1.3		None		None	''							(x(643))
rxn05396_c	rxn05396	rxn05396		9-methyl-decanoyl-ACP malonyl-acyl-carrier-protein C-acyltransferase decarboxylating	h_c + malACP_c + cpd11532_c -> co2_c + ACP_c + cpd11533_c	1		1	(CV_3412 or CV_3948 or CV_1541 or CV_3949) and (CV_3416 or CV_1096 or CV_0805)	(CV_3412 or CV_3948 or CV_1541 or CV_3949) and (CV_3416 or CV_1096 or CV_0805)	Fatty acid biosynthesis	0	0	1000	0	1.5		None		None	''							(x(432) | x(557) | x(115) | x(558)) & (x(435) | x(24) | x(730))
rxn04046_c	rxn04046	rxn04046		S-adenosyl-L-methionine cobalt-factor-II C20-methyltransferase	amet_c + copre2_c <=> h_c + ahcys_c + copre3_c	1		1	(CV_1565)	(CV_1565)	Porphyrin and chlorophyll metabolism	1	-1000	1000	0	1.3		None		None	''							(x(125))
rxn00910_c	rxn00910	rxn00910		5-methyltetrahydrofolate NADP oxidoreductase	h_c + nadph_c + mlthf_c -> nadp_c + 5mthf_c	1		1	(CV_0966)	(CV_0966)	One carbon pool by folate	0	0	1000	0	1.5		R01224		R01224	''			MTHFR3				(x(778))	Only in backward direction according to Metacyc
rxn02286_c	rxn02286	rxn02286		UDP-N-acetylmuramate L-alanine ligase ADP-forming	atp_c + ala__L_c + uamr_c -> h_c + adp_c + pi_c + uama_c	1		1	(CV_4342)	(CV_4342)	D-Glutamine and D-glutamate metabolism	0	0	1000	0	1.3		R03193		R03193	''			UAMAS				(x(646))
rxn05363_c	rxn05363	rxn05363		4-methyl-hexanoyl-ACP malonyl-acyl-carrier-protein C-acyltransferase decarboxylating	h_c + malACP_c + cpd11499_c -> co2_c + ACP_c + cpd11500_c	1		1	(CV_3412 or CV_3948 or CV_1541 or CV_3949) and (CV_3416 or CV_1096 or CV_0805)	(CV_3412 or CV_3948 or CV_1541 or CV_3949) and (CV_3416 or CV_1096 or CV_0805)	Fatty acid biosynthesis	0	0	1000	0	1.5		None		None	''							(x(432) | x(557) | x(115) | x(558)) & (x(435) | x(24) | x(730))
rxn01682_c	rxn01682	rxn01682		1S 2R-1-C-indol-3-ylglycerol 3-phosphate	3ig3p_c <=> g3p_c + indole_c	1		1	(CV_2761) and (CV_2762)	(CV_2761) and (CV_2762)	Phenylalanine, Tyrosine and Tryptophan biosynthesis	1	-1000	1000	0	2.2		R02340		R02340	''			TRPS3	TRPS3			(x(333)) & (x(334))	As per Metacyc should be forward only					only in forward in iDB149
rxn02474_c	rxn02474	rxn02474		5-amino-6-5-phosphoribitylaminouracil NADP 1-oxidoreductase	h_c + nadph_c + 5apru_c -> nadp_c + 5aprbu_c	1		1	(CV_1290)	(CV_1290)	Riboflavin metabolism	0	0	1000	0	1.5		R03458		R03458	''			APRAUR				(x(66))
rxn05324_c	rxn05324	rxn05324		Dodecanoyl-acyl-carrier protein malonyl-CoA	h_c + nadh_c + tddec2eACP_c -> nad_c + ddcaACP_c	1		1	(CV_1583) or (CV_3743)	(CV_1583) or (CV_3743)	Fatty acid biosynthesis	0	0	1000	0	2.2		R04724		R04724	''			EAR120x				(x(134)) | (x(516))
rxn01486_c	rxn01486	rxn01486		trans trans-Farnesyl-diphosphate isopentenyl-diphosphate	ipdp_c + frdp_c -> ppi_c + ggdp_c	1		1	(CV_0847) or (CV_2691) or (CV_3954) or (CV_2691) or (CV_3954)	(CV_0847) or (CV_2691) or (CV_3954) or (CV_2691) or (CV_3954)	Terpenoid biosynthesis	0	0	1000	0	1.2		R02061		R02061	''			FRTT				(x(738)) | (x(317)) | (x(560)) | (x(317)) | (x(560))
rxn05464_c	rxn05464	rxn05464		trans-Octodec-2-enoyl-ACP NAD oxidoreductase A-specific	h_c + nadh_c + cpd11572_c -> nad_c + cpd11573_c	1		1	(CV_1583) or (CV_3743)	(CV_1583) or (CV_3743)	Fatty acid biosynthesis	0	0	1000	0	1.1		None		None	''							(x(134)) | (x(516))
rxn05359_c	rxn05359	rxn05359		4-methyl-3-oxo-hexanoyl-ACP malonyl-acyl-carrier-protein C-acyltransferase decarboxylating	h_c + malACP_c + cpd11495_c -> co2_c + ACP_c + cpd11496_c	1		1	(CV_3412 or CV_3948 or CV_1541 or CV_3949) and (CV_3416 or CV_1096 or CV_0805)	(CV_3412 or CV_3948 or CV_1541 or CV_3949) and (CV_3416 or CV_1096 or CV_0805)	Fatty acid biosynthesis	0	0	1000	0	1.5		None		None	''							(x(432) | x(557) | x(115) | x(558)) & (x(435) | x(24) | x(730))
rxn00898_c	rxn00898	rxn00898		2 3-Dihydroxy-3-methylbutanoate hydro-lyase	23dhmb_c -> h2o_c + 3mob_c	1		1	(CV_1277)	(CV_1277)	Valine, Leucine and Isoleucine Biosynthesis	0	0	1000	0	2.2		R01209,R04441		R01209,R04441	''			None				(x(64))
rxn10203_c	rxn10203	rxn10203		myristoyl-glycerol-3-phosphate O-acyltransferase	glyc3p_c + tdcoa_c -> coa_c + 1tdecg3p_c	1		1	(CV_3688) and (CV_3417)	(CV_3688) and (CV_3417)	Glycerolipid and Glycerophospholipid metabolism	0	0	1000	0	1.5		None		None	''							(x(498)) & (x(436))
rxn01069_c	rxn01069	rxn01069		O-Phospho-L-homoserine phospho-lyase adding water	h2o_c + phom_c -> thr__L_c + h_c + pi_c	1		1	(CV_0997)	(CV_0997)	Glycine, Serine and Threonine metabolism	0	0	1000	0	1.5		R01466		R01466	''			THRS				(x(3))
rxn05322_c	rxn05322	rxn05322		Butyryl-acyl-carrier protein malonyl-CoA	h_c + nadh_c + but2eACP_c -> nad_c + butACP_c	1		1	(CV_1583) or (CV_3743)	(CV_1583) or (CV_3743)	Fatty acid biosynthesis	0	0	1000	0	1.3		R04429		R04429	''			EAR40x				(x(134)) | (x(516))
rxn00117_c	rxn00117	rxn00117		ATP nucleoside-diphosphate phosphatransferase	atp_c + udp_c -> adp_c + utp_c	1		1	(CV_3542)	(CV_3542)	Pyrimidine metabolism	0	0	1000	0	1.5		R00156		R00156	''			NDPK2				(x(457))	To avoid futile cycles
rxn01997_c	rxn01997	rxn01997		dTDPglucose 4 6-hydro-lyase	dtdpglu_c -> h2o_c + dtdp4d6dg_c	1		1	(CV_0819) or (CV_4010) or (CV_3884)	(CV_0819) or (CV_4010) or (CV_3884)	Streptomycin biosynthesis	0	0	1000	0	1.5		R06513		R06513	''			TDPGDH				(x(734)) | (x(570)) | (x(545))
rxn05458_c	rxn05458	rxn05458		hexadecanoyl-ACP acyl-carrier-protein transferase	coa_c + cpd11476_c -> ACP_c + pmtcoa_c	1		1	(CV_3415)	(CV_3415)	Fatty acid biosynthesis	0	0	1000	0	1.1		None		None	''							(x(434))
rxn00555_c	rxn00555	rxn00555		L-Glutamine D-fructose-6-phosphate aminotransferase hexose	f6p_c + gln__L_c -> glu__L_c + gam6p_c	1		1	(CV_0677)	(CV_0677)	Glutamate metabolism	0	0	1000	0	1.4		R00768		R00768	''			GF6PTA				(x(720))
rxn05541_c	rxn05541	rxn05541		Dipeptide transport via ABC system ala-glu	atp_c + h2o_c + ala_L_glu__L_e -> h_c + adp_c + pi_c + ala_L_glu__L_c	1		1	(CV_3936) or (CV_1097) or (CV_3426) or (CV_2688)	(CV_3936) or (CV_1097) or (CV_3426) or (CV_2688)	Transport via ABC	0	0	1000	0	1.3		None		None	''							(x(554)) | (x(25)) | (x(439)) | (x(316))
rxn00260_c	rxn00260	rxn00260		L-Aspartate 2-oxoglutarate aminotransferase	asp__L_c + akg_c <=> oaa_c + glu__L_c	1		1	(CV_1900) or (CV_0995) or (CV_1451) or (CV_1935) or (CV_1517)	(CV_1900) or (CV_0995) or (CV_1451) or (CV_1935) or (CV_1517)	Glutamate metabolism	1	-1000	1000	0	1.1		R00355		R00355	''			ASPTA				(x(196)) | (x(2)) | (x(95)) | (x(205)) | (x(110))
rxn05219_c	rxn05219	rxn05219		L-Methionine ABC transport	atp_c + h2o_c + met__L_e -> h_c + adp_c + met__L_c + pi_c	1		1	(CV_2297) and (CV_2296)	(CV_2297) and (CV_2296)	Transport via ABC	0	0	1000	0	1		None		None	''							(x(264)) & (x(263))
rxn05337_c	rxn05337	rxn05337		3R-3-Hydroxyhexanoyl-acyl-carrier-protein NADP oxidoreductase	h_c + nadph_c + 3ohexACP_c -> nadp_c + 3hhexACP_c	1		1	(CV_3414) or (CV_3947) or (CV_2707) or (CV_2258) or (CV_1046) or (CV_3576) or (CV_1546) or (CV_3406)	(CV_3414) or (CV_3947) or (CV_2707) or (CV_2258) or (CV_1046) or (CV_3576) or (CV_1546) or (CV_3406)	Fatty acid biosynthesis	0	0	1000	0	1.3		R04953		R04953	''			3OAR60				(x(433)) | (x(556)) | (x(320)) | (x(260)) | (x(9)) | (x(468)) | (x(117)) | (x(428))
rxn03137_c	rxn03137	rxn03137		10-Formyltetrahydrofolate 5-phosphoribosyl-5-amino-4-	10fthf_c + aicar_c -> thf_c + fprica_c	1		1	(CV_0546) and (CV_0546)	(CV_0546) and (CV_0546)	Purine metabolism	0	0	1000	0	1.5		R04560		R04560	''			AICART				(x(681)) & (x(681))
rxn05367_c	rxn05367	rxn05367		6-methyl-octanoyl-ACP malonyl-acyl-carrier-protein C-acyltransferase decarboxylating	h_c + malACP_c + cpd11503_c -> co2_c + ACP_c + cpd11504_c	1		1	(CV_3412 or CV_3948 or CV_1541 or CV_3949) and (CV_3416 or CV_1096 or CV_0805)	(CV_3412 or CV_3948 or CV_1541 or CV_3949) and (CV_3416 or CV_1096 or CV_0805)	Fatty acid biosynthesis	0	0	1000	0	1.5		None		None	''							(x(432) | x(557) | x(115) | x(558)) & (x(435) | x(24) | x(730))
rxn00527_c	rxn00527	rxn00527		L-Tyrosine 2-oxoglutarate aminotransferase	akg_c + tyr__L_c <=> glu__L_c + 2h34hppr_c	1		0	(CV_2382 and CV_0331) or (CV_0613 and CV_0038)	(CV_2382) or (CV_0331) or (CV_0613)	Phenylalanine, Tyrosine and Tryptophan biosynthesis	1	-1000	1000	0	2.2		R00734		R00734	''			TYRTA				(x(284) & x(405)) | (x(701) & x(838))						similar to TYRTA but 34hpp replaced by 2h34ppr
rxn04052_c	rxn04052	rxn04052		precorrin-8X methylmutase	copre8_c <=> cobya_c	1		1	(CV_1567)	(CV_1567)	Porphyrin and chlorophyll metabolism	1	-1000	1000	0	1.3		R05814		R05814	''			CPC8MM				(x(127))
rxn04045_c	rxn04045	rxn04045		sirohydrochlorin cobalt-lyase	2 h_c + scl_c + cobalt2_c <=> copre2_c	1		1	(CV_1567)	(CV_1567)	Porphyrin and chlorophyll metabolism	1	-1000	1000	0	1.1		R05807		R05807	''			None				(x(127))
rxn09188_c	rxn09188	rxn09188		Proline dehydrogenase	pro__L_c + fad_c <=> 1pyr5c_c + fadh2_c	1		1	(CV_1538)	(CV_1538)	Arginine and proline metabolism	1	-1000	1000	0	1.5		R01253		R01253	''			None				(x(114))
rxn03244_c	rxn03244	rxn03244		S-Hydroxydecanoyl-CoA NAD oxidoreductase	nad_c + 3hdcoa_c <=> h_c + nadh_c + 3odcoa_c	1		1	(CV_2720)	(CV_2720)	Fatty acid metabolism	1	-1000	1000	0	2.2		R04743		R04743	''			HACD4				(x(323))
rxn12645_c	rxn12645	rxn12645		aminopeptidase	h2o_c + gly_asn__L_c <=> gly_c + asn__L_c	1		1	(CV_2694) or (CV_4047) or (CV_1176) or (CV_4047) or (CV_2397) or (CV_2334) or (CV_2914)	(CV_2694) or (CV_4047) or (CV_1176) or (CV_4047) or (CV_2397) or (CV_2334) or (CV_2914)	Recycling of Peptidoglycan Amino Acids	1	-1000	1000	0	1.1		None		None	''							(x(319)) | (x(579)) | (x(47)) | (x(579)) | (x(289)) | (x(276)) | (x(353))
rxn02008_c	rxn02008	rxn02008		UDP-N-acetylmuramoyl-L-alanine D-glutamate ligaseADP-forming	atp_c + glu__D_c + uama_c -> h_c + adp_c + pi_c + uamag_c	1		1	(CV_4345)	(CV_4345)	D-Glutamine and D-glutamate metabolism	0	0	1000	0	1.3		R02783		R02783	''			UAMAGS				(x(648))
rxn05385_c	rxn05385	rxn05385		5-methyl-3-oxo-hexanoyl-ACP NADP oxidoreductase	h_c + nadph_c + cpd11521_c <=> nadp_c + cpd11522_c	1		1	(CV_3414) or (CV_3947) or (CV_2707) or (CV_2258) or (CV_1046) or (CV_3576) or (CV_1546) or (CV_3406)	(CV_3414) or (CV_3947) or (CV_2707) or (CV_2258) or (CV_1046) or (CV_3576) or (CV_1546) or (CV_3406)	Fatty acid biosynthesis	1	-1000	1000	0	1.1		None		None	''							(x(433)) | (x(556)) | (x(320)) | (x(260)) | (x(9)) | (x(468)) | (x(117)) | (x(428))
rxn05443_c	rxn05443	rxn05443		13-methyl-trans-tetra-dec-2-enoyl-ACP NAD oxidoreductase A-specific	h_c + nadh_c + cpd11539_c -> nad_c + cpd11540_c	1		1	(CV_1583) or (CV_3743)	(CV_1583) or (CV_3743)	Fatty acid biosynthesis	0	0	1000	0	1.1		None		None	''							(x(134)) | (x(516))
rxn00166_c	rxn00166	rxn00166		D-serine ammonia-lyase	ser__D_c -> pyr_c + nh4_c	1		1	(CV_2648)	(CV_2648)	Glycine, Serine and Threonine metabolism	0	0	1000	0	1.5		R00221		R00221	''			None				(x(314))
rxn02155_c	rxn02155	rxn02155		ATP nicotinamide-nucleotide adenylyltransferase	atp_c + nicrnt_c <=> ppi_c + dnad_c	1		1	(CV_0519)	(CV_0519)	Nicotinate and nicotinamide metabolism	1	-1000	1000	0	1.3		R03005		R03005	''			NNATr				(x(675))	Reversibility changed based on iAF1260
rxn00915_c	rxn00915	rxn00915		GMP pyrophosphate phosphoribosyltransferase	gua_c + prpp_c -> ppi_c + gmp_c	1		1	(CV_3900)	(CV_3900)	Purine metabolism	0	0	1000	0	1.5		R01229		R01229	''			GUAPRT				(x(547))
rxn00299_c	rxn00299	rxn00299		GTP 7 8-8 9-dihydrolase	h2o_c + gtp_c -> h_c + for_c + ahdt_c	1		1	(CV_1130) or (CV_2361)	(CV_1130) or (CV_2361)	Folate biosynthesis	0	0	1000	0	1.3		R00424		R00424	''			GTPCI				(x(36)) | (x(280))
rxn00839_c	rxn00839	rxn00839		ATP nucleoside-diphosphate phosphatransferase	atp_c + dadp_c -> adp_c + datp_c	1		1	(CV_3542)	(CV_3542)	Purine metabolism	0	0	1000	0	1.5		R01137		R01137	''			NDPK8				(x(457))	To avoid futile cycles
rxn00461_c	rxn00461	rxn00461		Phosphoenolpyruvate UDP-N-acetyl-D-glucosamine	uacgam_c + pep_c -> h_c + pi_c + uaccg_c	1		1	(CV_0440)	(CV_0440)	Aminosugars metabolism	0	0	1000	0	1.5		R00660		R00660	''			UAGCVT				(x(655))
rxn03395_c	rxn03395	rxn03395		2-octaprenyl-6-hydroxyphenol methylase	amet_c + 2ohph_c -> h_c + ahcys_c + 2omph_c	1		1	(CV_1031)	(CV_1031)	Ubiquinone biosynthesis	0	0	1000	0	1.3		R04988		R04988	''			OHPHM				(x(8))
rxn05434_c	rxn05434	rxn05434		6-methyl-trans-oct-2-enoyl-ACP NAD oxidoreductase A-specific	h_c + nadh_c + cpd11502_c -> nad_c + cpd11503_c	1		1	(CV_1583) or (CV_3743)	(CV_1583) or (CV_3743)	Fatty acid biosynthesis	0	0	1000	0	1.1		None		None	''							(x(134)) | (x(516))
rxn00283_c	rxn00283	rxn00283		L-Alanine racemase	ala__L_c -> ala__D_c	1		1	(CV_1915) or (CV_3793)	(CV_1915) or (CV_3793)	D-Alanine metabolism	0	0	1000	0	1.5		R00401		R00401	''			ALAR				(x(199)) | (x(534))	As per Metacyc should be forward only
rxn01508_c	rxn01508	rxn01508		ATP deoxyadenosine 5-phosphotransferase	atp_c + dad_2_c -> adp_c + damp_c	1		1	(CV_1634) and (CV_1634)	(CV_1634) and (CV_1634)	Purine metabolism	0	0	1000	0	1.1		R02089		R02089	''			DADNK				(x(149)) & (x(149))	Reversibility changed based on iAF1260
rxn00953_c	rxn00953	rxn00953		L-Serine hydro-lyase adding homocysteine	hcys__L_c + ser__L_c <=> h2o_c + cyst__L_c	1		1	(CV_3395)	(CV_3395)	Glycine, Serine and Threonine metabolism	1	-1000	1000	0	1.1		R01290,R01289		R01290,R01289	''			None				(x(427))
rxn10337_c	rxn10337	rxn10337		isoheptadecanoyl-cardiolipin synthase	2 cpd15722_c -> glyc_c + cpd15794_c	1		1	(CV_4039)	(CV_4039)	Glycerolipid and Glycerophospholipid metabolism	0	0	1000	0	1.5		None		None	''							(x(576))
rxn00938_c	rxn00938	rxn00938		Nicotinamide amidohydrolase	h2o_c + ncam_c -> nh4_c + nac_c	1		1	(CV_1264)	(CV_1264)	Nicotinate and nicotinamide metabolism	0	0	1000	0	1.5		R01268		R01268	''			None				(x(61))
rxn10221_c	rxn10221	rxn10221		anteisoheptadecanoyl-phosphatidate cytidylyltransferase	cpd15678_c + ctp_c -> ppi_c + cpd15684_c	1		1	(CV_2201)	(CV_2201)	Glycerolipid and Glycerophospholipid metabolism	0	0	1000	0	1.3		None		None	''							(x(248))
rxn09177_c	rxn09177	rxn09177		phosphopantothenate-cysteine ligase	ctp_c + cys__L_c + 4ppan_c -> ppi_c + cmp_c + 4ppcys_c	1		1	(CV_3080)	(CV_3080)	Pantothenate and CoA biosynthesis	0	0	1000	0	1.4		R04231		R04231	''			PPNCL2				(x(379))
rxn03437_c	rxn03437	rxn03437		R-2 3-Dihydroxy-3-methylpentanoate hydro-lyase	23dhmp_c -> h2o_c + 3mop_c	1		1	(CV_1277)	(CV_1277)	Valine, Leucine and Isoleucine Biosynthesis	0	0	1000	0	2.2		R05070		R05070	''			DHAD2				(x(64))
rxn02320_c	rxn02320	rxn02320		5-Amino-2-oxopentanoate 2-oxoglutarate aminotransferase	glu__L_c + imacp_c -> hisp_c + akg_c	1		1	(CV_0613)	(CV_0613)	Histidine metabolism	0	0	1000	0	1.3		R03243		R03243	''			AOOA				(x(701))
rxn10126_c	rxn10126	rxn10126		succinate dehyrdogenase	q8_c + fadh2_c -> q8h2_c + fad_c	1		1	(CV_1067 or CV_3369) and (CV_1068 or CV_3368) or (CV_1065) or (CV_1066)	(CV_1067 or CV_3369) and (CV_1068 or CV_3368) or (CV_1065) or (CV_1066)	Oxidative phosphorylation	0	0	1000	0	1.5		None		None	''							(x(14) | x(423)) & (x(15) | x(422)) | (x(12)) | (x(13))
rxn07587_c	rxn07587	rxn07587		rxn07587	codscl5b_c + amet_c <=> h_c + ahcys_c + copre6_c	1		1	(CV_1566)	(CV_1566)	Porphyrin and chlorophyll metabolism	1	-1000	1000	0	1.3		R07773		R07773	''			CODSCL5BMT				(x(126))
rxn02507_c	rxn02507	rxn02507		1-2-Carboxyphenylamino-1-deoxy-D-ribulose-5-phosphate	h_c + 2cpr5p_c -> co2_c + h2o_c + 3ig3p_c	1		1	(CV_2712 or CV_2763)	(CV_2712 or CV_2763)	Phenylalanine, Tyrosine and Tryptophan biosynthesis	0	0	1000	0	1.1		R03508		R03508	''			IGPS	IGPS			(x(321) | x(335))
rxn03901_c	rxn03901	rxn03901		Undecaprenyl-diphosphate phosphohydrolase	h2o_c + udcpdp_c -> h_c + pi_c + udcpp_c	1		1	(CV_1929) or (CV_1327)	(CV_1929) or (CV_1327)	Peptidoglycan biosynthesis	0	0	1000	0	1.4		R05627		R05627	''			None				(x(202)) | (x(70))
rxn00669_c	rxn00669	rxn00669		Propanoate CoA ligase ADP-forming	atp_c + coa_c + ppa_c -> adp_c + pi_c + ppcoa_c	1		1	(CV_3282)	(CV_3282)	Propanoate metabolism	0	0	1000	0	1.5		R00920		R00920	''			ACCOAL				(x(407))	Reversibility changed based on iAF1260
rxn05297_c	rxn05297	rxn05297		GLUt2	h_e + glu__L_e -> h_c + glu__L_c	1		1	(CV_3409)	(CV_3409)	Transport via Proton Symport	0	0	1000	0	1.3		None		None	''			GLUt2r	GLUt2r			(x(430))	Reversibility changed for BIOLOG data corrections
rxn00601_c	rxn00601	rxn00601		succinyl-CoA L-arginine N2-succinyltransferase	arg__L_c + succoa_c -> h_c + coa_c + sucarg_c	1		1	(CV_1498) or (CV_1497)	(CV_1498) or (CV_1497)	Arginine and proline metabolism	0	0	1000	0	1.5		R00832		R00832	''			AST				(x(104)) | (x(103))
rxn05226_c	rxn05226	rxn05226		Glucose-phosphotransferase PTS system	pep_c + glc__D_e -> pyr_c + g6p_c	1		1	(CV_0558 and (CV_3052 or CV_0816 or CV_0558 or CV_2311) and CV_0979 and CV_0979) or (CV_0558 and CV_0979 and CV_0979)	(CV_0558 and (CV_3052 or CV_0816 or CV_0558 or CV_2311) and CV_0979 and CV_0979) or (CV_0558 and CV_0979 and CV_0979)	Transport via PTS	0	0	1000	0	1		None		None	''			GLCpts	GLCpts			(x(685) & (x(372) | x(732) | x(685) | x(271)) & x(779) & x(779)) | (x(685) & x(779) & x(779))	As per Metacyc should be forward only
rxn05537_c	rxn05537	rxn05537		Dipeptide transport via ABC system gly-asp	atp_c + h2o_c + gly_asp__L_e -> h_c + adp_c + pi_c + gly_asp__L_c	1		1	(CV_3936) or (CV_1097) or (CV_3426) or (CV_2688)	(CV_3936) or (CV_1097) or (CV_3426) or (CV_2688)	Transport via ABC	0	0	1000	0	1.3		None		None	''							(x(554)) | (x(25)) | (x(439)) | (x(316))
rxn01333_c	rxn01333	rxn01333		Sedoheptulose-7-phosphate D-glyceraldehyde-3-phosphate	g3p_c + s7p_c <=> f6p_c + e4p_c	1		1	(CV_2247) or (CV_0564) or (CV_0349)	(CV_2247) or (CV_0564) or (CV_0349)	Pentose Phosphate Pathway	1	-1000	1000	0	1.3		R01827,R08575		R01827,R08575	''			TALA	TALA			(x(257)) | (x(688)) | (x(444))
rxn05560_c	rxn05560	rxn05560		D-fructose transport via PEP Pyr PTS	pep_c + fru_e -> pyr_c + f1p_c	1		1	(CV_3054 or CV_2310) and (CV_3052 or CV_0816 or CV_0558 or CV_2311) and (CV_3054 or CV_2309)	(CV_3054 or CV_2310) and (CV_3052 or CV_0816 or CV_0558 or CV_2311) and (CV_3054 or CV_2309)	Transport via PTS	0	0	1000	0	1		None		None	''			FRUpts				(x(374) | x(270)) & (x(372) | x(732) | x(685) | x(271)) & (x(374) | x(269))	As per Metacyc should be forward only					f1p instead of f6p
rxn08291_c	rxn08291	rxn08291		D-Amino acid dehydrogenase	h2o_c + fad_c + ala__D_c <=> pyr_c + nh4_c + fadh2_c	1		1	(CV_1914) or (CV_3692)	(CV_1914) or (CV_3692)	Pyruvate Alanine Serine Interconversions	1	-1000	1000	0	1		None		None	''							(x(198)) | (x(501))
rxn06865_c	rxn06865	rxn06865		Endotoxin Synthesis lauroyl transferase	ddcaACP_c + kdo2lipid4_c -> ACP_c + kdo2lipid4L_c	1		1	(CV_0962) or (CV_0961)	(CV_0962) or (CV_0961)	Lipopolysaccharide biosynthesis	0	0	1000	0	1.1		R05146		R05146	''			EDTXS1				(x(775)) | (x(774))
rxn08204_c	rxn08204	rxn08204		CDP-Diacylglycerol pyrophostatase n-C18 0	h2o_c + cdpdodecg_c -> cmp_c + pa180_c	1		1	(CV_4315)	(CV_4315)	Glycerolipid and Glycerophospholipid metabolism	0	0	1000	0	1.3		None		None	''							(x(643))
rxn00303_c	rxn00303	rxn00303		ATP GTP 3-pyrophosphotransferase	atp_c + gtp_c -> amp_c + gdptp_c	1		1	(CV_3768) or (CV_3702)	(CV_3768) or (CV_3702)	Purine metabolism	0	0	1000	0	1.4		R00429		R00429	''			GTPDPK_1				(x(525)) | (x(509))	Reversibility changed based on iAF1260
rxn01434_c	rxn01434	rxn01434		L-Citrulline L-aspartate ligase AMP-forming	atp_c + asp__L_c + citr__L_c -> ppi_c + argsuc_c + amp_c	1		1	(CV_1994)	(CV_1994)	Urea cycle and metabolism of amino groups	0	0	1000	0	1.3		R01954		R01954	''			ARGSS_1				(x(214))
rxn00693_c	rxn00693	rxn00693		5-Methyltetrahydrofolate L-homocysteine S-methyltransferase	hcys__L_c + 5mthf_c -> met__L_c + thf_c	1		1	(CV_0203)	(CV_0203)	Methionine metabolism	0	0	1000	0	1		R00946		R00946	''			METS_1				(x(210))
rxn00122_c	rxn00122	rxn00122		ATP FMN adenylyltransferase	atp_c + fmn_c -> ppi_c + fad_c	1		1	(CV_3570) and (CV_3570)	(CV_3570) and (CV_3570)	Riboflavin metabolism	0	0	1000	0	1.5		R00161		R00161	''			FMNAT				(x(465)) & (x(465))
rxn01116_c	rxn01116	rxn01116		D-Ribulose-5-phosphate 3-epimerase	xu5p__D_c -> ru5p__D_c	1		1	(CV_2182)	(CV_2182)	Pentose Phosphate Pathway	0	0	1000	0	2.2		R01529		R01529	''			RPE	RPE			(x(244))
rxn00470_c	rxn00470	rxn00470		L-Ornithine carboxy-lyase	h_c + orn_c -> co2_c + ptrc_c	1		1	(CV_1992) or (CV_4040)	(CV_1992) or (CV_4040)	Glutathione metabolism	0	0	1000	0	1.1		R00670		R00670	''			ORNDC				(x(212)) | (x(577))
rxn03908_c	rxn03908	rxn03908		ATP 4-Cytidine 5-diphospho-2-C-methyl-D-erythritol	atp_c + 4c2me_c -> adp_c + 2p4c2me_c	1		1	(CV_4059)	(CV_4059)	Terpenoid biosynthesis	0	0	1000	0	1.3		R05634		R05634	''			CDPMEK				(x(583))
rxn05436_c	rxn05436	rxn05436		10-methyl-trans-dodec-2-enoyl-ACP NAD oxidoreductase A-specific	h_c + nadh_c + cpd11510_c -> nad_c + cpd11511_c	1		1	(CV_1583) or (CV_3743)	(CV_1583) or (CV_3743)	Fatty acid biosynthesis	0	0	1000	0	1.1		None		None	''							(x(134)) | (x(516))
rxn08308_c	rxn08308	rxn08308		CDP-diacylglycerol synthetase n-C14 1	ctp_c + pa141_c -> ppi_c + cdpdtdec7eg_c	1		1	(CV_2201)	(CV_2201)	Glycerolipid and Glycerophospholipid metabolism	0	0	1000	0	1.3		None		None	''							(x(248))
rxn00409_c	rxn00409	rxn00409		ATP nucleoside-diphosphate phosphatransferase	atp_c + cdp_c -> adp_c + ctp_c	1		1	(CV_3542)	(CV_3542)	Pyrimidine metabolism	0	0	1000	0	1.5		R00570		R00570	''			NDPK3				(x(457))	To avoid futile cycles
rxn08199_c	rxn08199	rxn08199		CDP-Diacylglycerol pyrophostatase n-C12 0	h2o_c + cdpdddecg_c -> cmp_c + pa120_c	1		1	(CV_4315)	(CV_4315)	Glycerolipid and Glycerophospholipid metabolism	0	0	1000	0	1.3		None		None	''							(x(643))
rxn01986_c	rxn01986	rxn01986		2-Deoxy-D-ribose 1-phosphate 1 5-phosphomutase	2dr1p_c -> 2dr5p_c	1		1	(CV_3699)	(CV_3699)	Pentose Phosphate Pathway	0	0	1000	0	2.2		R02749		R02749	''			PPM2				(x(506))	As per Metacyc should be forward only
rxn05207_c	rxn05207	rxn05207		Na/malate symporter	na1_e + mal__L_e -> mal__L_c + na1_c	1		1	(CV_2167)	(CV_2167)	Transport via Symport	0	0	1000	0	1.3		None		None	''							(x(237))	Reversibility changed for BIOLOG data corrections
rxn10154_c	rxn10154	rxn10154		succinate transport via proton symport 2 H	2 h_e + succ_e -> 2 h_c + succ_c	1		1	(CV_3707)	(CV_3707)	Transport via Proton Symport	0	0	1000	0	1.3		None		None	''			SUCCt2_2	SUCCt2_2			(x(510))	Reversibility changed based on iAF1260
rxn02213_c	rxn02213	rxn02213		3-Dehydroquinate hydro-lyase	3dhq_c -> h2o_c + 3dhsk_c	1		1	(CV_0987)	(CV_0987)	Phenylalanine, Tyrosine and Tryptophan biosynthesis	0	0	1000	0	1.1		R03084		R03084	''			DHQTi	DHQD			(x(782))
rxn02200_c	rxn02200	rxn02200		2-Amino-4-hydroxy-6-hydroxymethyl-7 8-dihydropteridine 4-	4abz_c + 6hmhpt_c <=> h2o_c + dhpt_c	1		1	(CV_3796)	(CV_3796)	Folate biosynthesis	1	-1000	1000	0	1.5		R03066		R03066	''			None				(x(536))
rxn05397_c	rxn05397	rxn05397		11-methyl-3-oxo-dodecanoyl-ACP NADP oxidoreductase	h_c + nadph_c + cpd11533_c -> nadp_c + cpd11534_c	1		1	(CV_3414) or (CV_3947) or (CV_2707) or (CV_2258) or (CV_1046) or (CV_3576) or (CV_1546) or (CV_3406)	(CV_3414) or (CV_3947) or (CV_2707) or (CV_2258) or (CV_1046) or (CV_3576) or (CV_1546) or (CV_3406)	Fatty acid biosynthesis	0	0	1000	0	1.1		None		None	''							(x(433)) | (x(556)) | (x(320)) | (x(260)) | (x(9)) | (x(468)) | (x(117)) | (x(428))
rxn00616_c	rxn00616	rxn00616		sn-Glycerol-3-phosphate acceptor 2-oxidoreductase	glyc3p_c + fad_c -> dhap_c + fadh2_c	1		1	(CV_0254)	(CV_0254)	Glycerolipid and Glycerophospholipid metabolism	0	0	1000	0	1.3		R00848		R00848	''			G3PD				(x(303))	As per Metacyc should be forward only
rxn03062_c	rxn03062	rxn03062		3-Isopropylmalate NAD oxidoreductase	nad_c + 3c2hmp_c -> h_c + nadh_c + 3c4mop_c	1		1	(CV_2778)	(CV_2778)	Valine, Leucine and Isoleucine Biosynthesis	0	0	1000	0	1.5		R04426		R04426	''			IPMD				(x(338))
rxn00506_c	rxn00506	rxn00506		Acetaldehyde NAD oxidoreductase	acald_c + h2o_c + nad_c -> 2 h_c + ac_c + nadh_c	1		1	(CV_1222)	(CV_1222)	Pyruvate metabolism	0	0	1000	0	2.2		R00710		R00710	''			ALDD2x				(x(56))
rxn04384_c	rxn04384	rxn04384		adenosylcobyric acid R-1-aminopropan-2-yl phosphate ligase	atp_c + adcobhex_c + applp_c -> 2 h_c + adp_c + pi_c + adocbip_c	1		1	(CV_1575) or (CV_1002)	(CV_1575) or (CV_1002)	Porphyrin and chlorophyll metabolism	0	0	1000	0	1.5		R06529		R06529	''			ADCPS2				(x(132)) | (x(4))	Reversibility changed based on iAF1260
rxn01388_c	rxn01388	rxn01388		isocitrate hydro-lyase	h2o_c + acon_C_c -> icit_c	1		0	(CV_1121 and CV_2054) or (CV_2470)	(CV_1121 and CV_1121) or (CV_2470)	TCA Cycle	0	0	1000	0	2.2		R01900		R01900	''			ACONTb	ACONTb			(x(32) & x(225)) | (x(296))	Only in backward direction according to Metacyc					Add CV_2054 but directionality should be same
rxn10214_c	rxn10214	rxn10214		isoheptadecanoyl-1-acylglycerol-3-phosphate O-acyltransferase	fa11coa_c + cpd15671_c -> coa_c + cpd15677_c	1		1	(CV_4063) or (CV_1658)	(CV_4063) or (CV_1658)	Glycerolipid and Glycerophospholipid metabolism	0	0	1000	0	1.3		None		None	''							(x(584)) | (x(162))
rxn01791_c	rxn01791	rxn01791		R-Pantoate beta-alanine ligase AMP-forming	atp_c + ala_B_c + pant__R_c -> ppi_c + amp_c + pnto__R_c	1		1	(CV_1636)	(CV_1636)	Pantothenate and CoA biosynthesis	0	0	1000	0	1.4		R02473		R02473	''			PBAL				(x(151))
rxn05578_c	rxn05578	rxn05578		glycerol-3-phosphate transport in via proton symport	h_e + glyc3p_e -> h_c + glyc3p_c	1		1	(CV_0253)	(CV_0253)	Transport via Proton Symport	0	0	1000	0	1		None		None	''							(x(301))	Reversiblity changed for BIOLOG corrections
rxn00222_c	rxn00222	rxn00222		1 4-beta-D-Glucan glucohydrolase	h2o_c + cellb_c -> 2 glc__D_c	1		1	(CV_1272)	(CV_1272)	Starch and sucrose metabolism	0	0	1000	0	1.5		R00306		R00306	''			BGLA				(x(63))
rxn03245_c	rxn03245	rxn03245		S-Hydroxydecanoyl-CoA hydro-lyase	3hdcoa_c <=> h2o_c + dc2coa_c	1		1	(CV_2720) or (CV_1553) or (CV_2485)	(CV_2720) or (CV_1553) or (CV_2485)	Fatty acid metabolism	1	-1000	1000	0	1.1		R04744		R04744	''			ECOAH4				(x(323)) | (x(118)) | (x(302))
rxn00020_c	rxn00020	rxn00020		beta-D-Glucoside glucohydrolase	h2o_c + cellb_c -> 2 glc_bD_c	1		1	(CV_1272)	(CV_1272)	Starch and sucrose metabolism	0	0	1000	0	1.5		R00026		R00026	''			None				(x(63))
rxn01519_c	rxn01519	rxn01519		dUTP nucleotidohydrolase	h2o_c + dutp_c -> ppi_c + dump_c	1		1	(CV_3081)	(CV_3081)	Pyrimidine metabolism	0	0	1000	0	1.5		R02100		R02100	''			DUTPDP				(x(380))
rxn00029_c	rxn00029	rxn00029		5-Aminolevulinate hydro-lyaseadding 5-aminolevulinate and	2 5aop_c -> h_c + 2 h2o_c + ppbng_c	1		1	(CV_1648)	(CV_1648)	Porphyrin and chlorophyll metabolism	0	0	1000	0	1.5		R00036		R00036	''			PPBNGS				(x(154))
rxn03060_c	rxn03060	rxn03060		2-Hydroxybutane-1 2 3-tricarboxylate hydro-lyase	2mcit_c <=> h2o_c + 2mcacn_c	1		1	(CV_2054)	(CV_2054)	Propanoate metabolism	1	-1000	1000	0	1.1		R04424		R04424	''			MCITD				(x(225))
rxn00242_c	rxn00242	rxn00242		Guanosine-3 5-bisdiphosphate 3-pyrophosphohydrolase	h2o_c + ppgpp_c -> ppi_c + gdp_c	1		1	(CV_3768)	(CV_3768)	Purine metabolism	0	0	1000	0	1.4		R00336		R00336	''			PPGPPDP				(x(525))
rxn01143_c	rxn01143	rxn01143		ATP thymidine 5-phosphotransferase	atp_c + thymd_c -> adp_c + dtmp_c	1		1	(CV_2342)	(CV_2342)	Pyrimidine metabolism	0	0	1000	0	1.5		R01567		R01567	''			TMDK1				(x(277))	Reversibility changed based on iAF1260
rxn01975_c	rxn01975	rxn01975		beta-D-Glucose-6-phosphate NADP 1-oxoreductase	nadp_c + g6p_B_c -> h_c + nadph_c + 6pgl_c	1		1	(CV_0145)	(CV_0145)	Pentose Phosphate Pathway	0	0	1000	0	2.2		R02736		R02736	''			G6PBDH				(x(79))	As per Metacyc should be forward only
rxn10338_c	rxn10338	rxn10338		anteisoheptadecanoyl-cardiolipin synthase	2 cpd15723_c -> glyc_c + cpd15795_c	1		1	(CV_4039)	(CV_4039)	Glycerolipid and Glycerophospholipid metabolism	0	0	1000	0	1.5		None		None	''							(x(576))
rxn09687_c	rxn09687	rxn09687		deoxyinosine transport in via proton symport	h_e + din_e <=> h_c + din_c	1		1	(CV_2040) or (CV_1931)	(CV_2040) or (CV_1931)	Transport via Proton Symport	1	-1000	1000	0	1.3		None		None	''							(x(222)) | (x(203))
rxn03491_c	rxn03491	rxn03491		S-Adenosyl-L-methionine 1-precorrin-6Y C5 15-methyltransferase	pre6b_c + 2 amet_c <=> 2 h_c + co2_c + 2 ahcys_c + pre8_c	1		1	(CV_1568)	(CV_1568)	Porphyrin and chlorophyll metabolism	1	-1000	1000	0	1.2		R05149		R05149	''			PC6YM				(x(128))
rxn04413_c	rxn04413	rxn04413		rxn04413	gtp_c + adocbi_c <=> h_c + gdp_c + adocbip_c	1		1	(CV_0495)	(CV_0495)	Porphyrin and chlorophyll metabolism	1	-1000	1000	0	1.3		R06558		R06558	''			None				(x(667))
rxn05329_c	rxn05329	rxn05329		3R-3-Hydroxybutanoyl-acyl-carrier-protein hydro-lyase	3hbutACP_c -> h2o_c + but2eACP_c	1		1	(CV_3950) or (CV_2207)	(CV_3950) or (CV_2207)	Fatty acid biosynthesis	0	0	1000	0	1.5		R04428		R04428	''			3HAD40_1				(x(559)) | (x(251))
rxn01964_c	rxn01964	rxn01964		L-Serine hydro-lyase adding indoleglycerol-phosphate	ser__L_c + 3ig3p_c -> h2o_c + g3p_c + trp__L_c	1		1	(CV_2761) and (CV_2762)	(CV_2761) and (CV_2762)	Phenylalanine, Tyrosine and Tryptophan biosynthesis	0	0	1000	0	2.2		R02722		R02722	''			TRPS1	TRPS1			(x(333)) & (x(334))
rxn10113_c	rxn10113	rxn10113		cytochrome oxidase bo3 ubiquinol-8 2.5 protons	2.5 h_c + 0.5 o2_c + q8h2_c -> h2o_c + 2.5 h_e + q8_c	1		1	(CV_3995) or (CV_3993) or (CV_4008 and CV_4007) or (CV_3996) or (CV_3657 and CV_3658) or (CV_1065) or (CV_3994)	(CV_3995) or (CV_3993) or (CV_4008 and CV_4007) or (CV_3996) or (CV_3657 and CV_3658) or (CV_1065) or (CV_3994)	Oxidative phosphorylation	0	0	1000	0	1.5		None		None	''							(x(565)) | (x(563)) | (x(569) & x(568)) | (x(566)) | (x(488) & x(489)) | (x(12)) | (x(564))
rxn00559_c	rxn00559	rxn00559		D-Mannose-6-phosphate ketol-isomerase	man6p_c <=> f6p_c	1		1	(CV_3178) or (CV_2312)	(CV_3178) or (CV_2312)	Fructose and Mannose metabolism	1	-1000	1000	0	1.3		R01819,R00772		R01819,R00772	''			None				(x(392)) | (x(272))
rxn10043_c	rxn10043	rxn10043		cytochrome-c oxidase H/e- = 2	6 h_c + 0.5 o2_c + 2 focytc_c -> h2o_c + 4 h_e + 2 ficytC_c	1		1	(CV_0599) and (CV_0600) and (CV_0603)	(CV_0599) and (CV_0600) and (CV_0603)	Oxidative phosphorylation	0	0	1000	0	1.5		None		None	''							(x(696)) & (x(697)) & (x(698))	Only forward as per SEED
rxn03537_c	rxn03537	rxn03537		Adenosyl cobinamide phosphate guanyltransferase	h_c + gtp_c + adocbip_c -> ppi_c + agdpcbi_c	1		1	(CV_0495)	(CV_0495)	Porphyrin and chlorophyll metabolism	0	0	1000	0	1.3		R05222		R05222	''			ACBIPGT				(x(667))
rxn12510_c	rxn12510	rxn12510		ATP pantothenate 4-phosphotransferase	atp_c + pnto__R_c -> adp_c + 4ppan_c	1		1	(CV_0487)	(CV_0487)	Pantothenate and CoA biosynthesis	0	0	1000	0	1.3		R03018		R03018	''			PNTK				(x(661))
rxn01516_c	rxn01516	rxn01516		dTTP uridine 5-phosphotransferase	uri_c + dttp_c -> ump_c + dtdp_c	1		1	(CV_1085)	(CV_1085)	Pyrimidine metabolism	0	0	1000	0	1.5		R02097		R02097	''			DTTUP				(x(23))	As per Metacyc should be forward only
rxn05392_c	rxn05392	rxn05392		7-methyl-octanoyl-ACP malonyl-acyl-carrier-protein C-acyltransferase decarboxylating	h_c + malACP_c + cpd11528_c -> co2_c + ACP_c + cpd11529_c	1		1	(CV_3412 or CV_3948 or CV_1541 or CV_3949) and (CV_3416 or CV_1096 or CV_0805)	(CV_3412 or CV_3948 or CV_1541 or CV_3949) and (CV_3416 or CV_1096 or CV_0805)	Fatty acid biosynthesis	0	0	1000	0	1.5		None		None	''							(x(432) | x(557) | x(115) | x(558)) & (x(435) | x(24) | x(730))
rxn05176_c	rxn05176	rxn05176		Thiosulfate-ABC transport	atp_c + h2o_c + tsul_e -> h_c + adp_c + tsul_c + pi_c	1		1	(CV_1828)	(CV_1828)	Transport via ABC	0	0	1000	0	1		None		None	''							(x(188))
rxn00161_c	rxn00161	rxn00161		S-Malate NADP oxidoreductaseoxaloacetate-decarboxylating	nadp_c + mal__L_c -> co2_c + nadph_c + pyr_c	1		1	(CV_0916)	(CV_0916)	Pyruvate metabolism	0	0	1000	0	2.2		R00216		R00216	''			ME2	ME2			(x(749))
rxn05231_c	rxn05231	rxn05231		Ribonucleotide reductase ADP	adp_c + trdrd_c -> h2o_c + trdox_c + dadp_c	1		1	(CV_2284) or (CV_2287)	(CV_2284) or (CV_2287)	Purine metabolism	0	0	1000	0	1		R02017		R02017	''			RNDR1				(x(261)) | (x(262))
rxn01477_c	rxn01477	rxn01477		6-Phospho-D-gluconate hydro-lyase	6pgc_c -> h2o_c + 2ddg6p_c	1		1	(CV_0144)	(CV_0144)	Pentose Phosphate Pathway	0	0	1000	0	2.2		R02036		R02036	''			EDD	EDD			(x(78))
rxn02380_c	rxn02380	rxn02380		beta-D-Glucose 6-phosphate ketol-isomerase	g6p_B_c <=> f6p_c	1		1	(CV_0149) or (CV_2369)	(CV_0149) or (CV_2369)	Glycolysis/Gluconeogenesis	1	-1000	1000	0	1.5		R03321		R03321	''			None				(x(84)) | (x(282))
rxn00474_c	rxn00474	rxn00474		L-Serine hydro-lyase adding indoleglycerol-phosphate	ser__L_c + indole_c -> h2o_c + trp__L_c	1		1	(CV_2761) and (CV_2762)	(CV_2761) and (CV_2762)	Phenylalanine, Tyrosine and Tryptophan biosynthesis	0	0	1000	0	2.2		R00674		R00674	''			TRPS2	TRPS2			(x(333)) & (x(334))
rxn05582_c	rxn05582	rxn05582		glycine transport in/out via proton symport	h_e + gly_e <=> gly_c + h_c	1		1	(CV_1138)	(CV_1138)	Transport via Proton Symport	1	-1000	1000	0	1.3		None		None	''							(x(40))
rxn03435_c	rxn03435	rxn03435		R-2 3-Dihydroxy-3-methylpentanoate NADP oxidoreductase	h_c + nadph_c + 3hmop_c -> nadp_c + 23dhmp_c	1		1	(CV_0588)	(CV_0588)	Valine, Leucine and Isoleucine Biosynthesis	0	0	1000	0	2.2		R05068		R05068	''			KARI_23dhmp				(x(693))						Bigg Id rxn in chloroplast
rxn01673_c	rxn01673	rxn01673		ATP nucleoside-diphosphate phosphatransferase	atp_c + dcdp_c -> adp_c + dctp_c	1		1	(CV_3542)	(CV_3542)	Pyrimidine metabolism	0	0	1000	0	1.5		R02326		R02326	''			NDPK7				(x(457))	Only forward to avoid futile cycles
rxn12845_c	rxn12845	rxn12845		Gly-Leu aminopeptidase	h2o_c + gly_leu__L_c <=> gly_c + leu__L_c	1		1	(CV_2694) or (CV_4047) or (CV_1176) or (CV_4047) or (CV_2397) or (CV_2334) or (CV_2914)	(CV_2694) or (CV_4047) or (CV_1176) or (CV_4047) or (CV_2397) or (CV_2334) or (CV_2914)	Recycling of Peptidoglycan Amino Acids	1	-1000	1000	0	1.4		None		None	''							(x(319)) | (x(579)) | (x(47)) | (x(579)) | (x(289)) | (x(276)) | (x(353))
rxn00085_c	rxn00085	rxn00085		L-Glutamate NADP oxidoreductase transaminating	h_c + nadph_c + akg_c + gln__L_c -> nadp_c + 2 glu__L_c	1		1	(CV_4038) and (CV_4037)	(CV_4038) and (CV_4037)	Glutamate metabolism	0	0	1000	0	1.3		R00114		R00114	''			GLUSy	GLUSy			(x(575)) & (x(574))	Only in backward direction according to Metacyc
rxn05340_c	rxn05340	rxn05340		3R-3-Hydroxydodecanoyl-acyl-carrier-protein NADP oxidoreductase	h_c + nadph_c + 3oddecACP_c -> nadp_c + 3hddecACP_c	1		1	(CV_3414) or (CV_3947) or (CV_2707) or (CV_2258) or (CV_1046) or (CV_3576) or (CV_1546) or (CV_3406)	(CV_3414) or (CV_3947) or (CV_2707) or (CV_2258) or (CV_1046) or (CV_3576) or (CV_1546) or (CV_3406)	Fatty acid biosynthesis	0	0	1000	0	1.3		R04964		R04964	''			3OAR120				(x(433)) | (x(556)) | (x(320)) | (x(260)) | (x(9)) | (x(468)) | (x(117)) | (x(428))
rxn00832_c	rxn00832	rxn00832		IMP 1 2-hydrolase decyclizing	fprica_c -> h2o_c + imp_c	1		1	(CV_0546) and (CV_0546)	(CV_0546) and (CV_0546)	Purine metabolism	0	0	1000	0	1.5		R01127		R01127	''			IMPC				(x(681)) & (x(681))
rxn00251_c	rxn00251	rxn00251		Orthophosphate oxaloacetate carboxyl-lyase phosphorylating	co2_c + h2o_c + pep_c -> 2 h_c + pi_c + oaa_c	1		1	(CV_0055)	(CV_0055)	Pyruvate metabolism	0	0	1000	0	1.5		R00345		R00345	''			PPC	PPC			(x(673))	Only in backward direction according to Metacyc
rxn05317_c	rxn05317	rxn05317		DADNt2	h_e + dad_2_e <=> h_c + dad_2_c	1		1	(CV_2040 or CV_1931)	(CV_2040 or CV_1931)	Transport	1	-1000	1000	0	1.3		None		None	''			DADNt2				(x(222) | x(203))
rxn01368_c	rxn01368	rxn01368		Cytidine aminohydrolase	h_c + h2o_c + cytd_c -> uri_c + nh4_c	1		1	(CV_2570)	(CV_2570)	Pyrimidine metabolism	0	0	1000	0	1.3		R01878		R01878	''			None				(x(312))
rxn02187_c	rxn02187	rxn02187		2-Acetolactate methylmutase	alac__S_c -> 3hmoa_c	1		1	(CV_0588)	(CV_0588)	Valine, Leucine and Isoleucine Biosynthesis	0	0	1000	0	2.2		R05071,R03052		R05071,R03052	''			None				(x(693))	As per Metacyc should be forward only
rxn01219_c	rxn01219	rxn01219		ATP CMP phosphotransferase	atp_c + dcmp_c -> adp_c + dcdp_c	1		1	(CV_3047)	(CV_3047)	Pyrimidine metabolism	0	0	1000	0	1.5		R01665		R01665	''			CYTK2				(x(370))	As per Metacyc should be forward only
rxn03514_c	rxn03514	rxn03514		S-adenosyl-L-methionine precorrin-4 C11 methyltransferase	amet_c + pre4_c <=> h_c + ahcys_c + pre5_c	1		1	(CV_1564)	(CV_1564)	Porphyrin and chlorophyll metabolism	1	-1000	1000	0	1.3		R05181		R05181	''			PC11M				(x(124))
rxn08799_c	rxn08799	rxn08799		Lysophospholipase L1 2-acylglycerophosphotidate n-C16 0	h2o_c + 1hdecg3p_c -> h_c + glyc3p_c + hdca_c	1		1	(CV_0167)	(CV_0167)	Glycerolipid and Glycerophospholipid metabolism	0	0	1000	0	1.3		None		None	''							(x(138))
rxn05543_c	rxn05543	rxn05543		Dipeptide transport via ABC system ala-his	atp_c + h2o_c + ala_L_his__L_e -> h_c + adp_c + pi_c + ala_L_his__L_c	1		1	(CV_3936) or (CV_1097) or (CV_3426) or (CV_2688)	(CV_3936) or (CV_1097) or (CV_3426) or (CV_2688)	Transport via ABC	0	0	1000	0	1.3		None		None	''							(x(554)) | (x(25)) | (x(439)) | (x(316))
rxn01127_c	rxn01127	rxn01127		ATP AMP phosphotransferase	atp_c + damp_c -> adp_c + dadp_c	1		1	(CV_3343)	(CV_3343)	Purine metabolism	0	0	1000	0	2.2		R01547		R01547	''			DADK				(x(415))	As per Metacyc should be forward only
rxn08309_c	rxn08309	rxn08309		CDP-diacylglycerol synthetase n-C16 0	pa160_c + ctp_c -> ppi_c + cdpdhdecg_c	1		1	(CV_2201)	(CV_2201)	Glycerolipid and Glycerophospholipid metabolism	0	0	1000	0	1.3		None		None	''							(x(248))
rxn03892_c	rxn03892	rxn03892		PPTT	ipdp_c + pendp_c -> ppi_c + hexdp_c	1		1	(CV_0847) or (CV_2691) or (CV_3954)	(CV_0847) or (CV_2691) or (CV_3954)	Biosynthesis of steroids	0	0	1000	0	1.1		R05613		R05613	''			PPTTm				(x(738)) | (x(317)) | (x(560))						Bigg Id rxn in mitochondria
rxn05461_c	rxn05461	rxn05461		3-Hydroxyoctodecanoyl-ACP NADP oxidoreductase	h_c + nadph_c + cpd11570_c -> nadp_c + cpd11571_c	1		1	(CV_3414) or (CV_3947) or (CV_2707) or (CV_2258) or (CV_1046) or (CV_3576) or (CV_1546) or (CV_3406)	(CV_3414) or (CV_3947) or (CV_2707) or (CV_2258) or (CV_1046) or (CV_3576) or (CV_1546) or (CV_3406)	Fatty acid biosynthesis	0	0	1000	0	1.1		None		None	''							(x(433)) | (x(556)) | (x(320)) | (x(260)) | (x(9)) | (x(468)) | (x(117)) | (x(428))
rxn08312_c	rxn08312	rxn08312		CDP-diacylglycerol synthetase n-C18 1	ctp_c + pa181_c -> ppi_c + cdpdodec11eg_c	1		1	(CV_2201)	(CV_2201)	Glycerolipid and Glycerophospholipid metabolism	0	0	1000	0	1.3		None		None	''							(x(248))
rxn00291_c	rxn00291	rxn00291		N-succinyl-L-glutamate amidohydrolase	h2o_c + sucglu_c <=> succ_c + glu__L_c	1		1	(CV_3937) or (CV_2877)	(CV_3937) or (CV_2877)	Arginine and proline metabolism	1	-1000	1000	0	4.2		R00411		R00411	''			SGDS				(x(555)) | (x(349))
rxn12849_c	rxn12849	rxn12849		Gly-Leu ABC transporters	atp_c + h2o_c + gly_leu__L_e -> h_c + adp_c + pi_c + gly_leu__L_c	1		1	(CV_3936) or (CV_1097) or (CV_3426) or (CV_2688)	(CV_3936) or (CV_1097) or (CV_3426) or (CV_2688)	Transport via ABC	0	0	1000	0	1.3		None		None	''							(x(554)) | (x(25)) | (x(439)) | (x(316))
rxn00772_c	rxn00772	rxn00772		ATP D-ribose 5-phosphotransferase	atp_c + rib__D_c -> adp_c + r5p_c	1		1	(CV_3020)	(CV_3020)	Pentose Phosphate Pathway	0	0	1000	0	1.3		R01051		R01051	''			None				(x(364))	Reversibility changed based on iAF1260
rxn00410_c	rxn00410	rxn00410		UTP ammonia ligaseADP-forming	atp_c + nh4_c + utp_c -> 2 h_c + adp_c + pi_c + ctp_c	1		1	(CV_3457)	(CV_3457)	Pyrimidine metabolism	0	0	1000	0	1.5		R00571		R00571	''			None				(x(447))	Reversibility changed based on iAF1260
rxn05160_c	rxn05160	rxn05160		D-Ribose ABC transport	atp_c + h2o_c + rib__D_e -> h_c + adp_c + pi_c + rib__D_c	1		1	(CV_3016 or CV_3015) and (CV_3017) and (CV_3018) and (CV_3019)	(CV_3016 or CV_3015) and (CV_3017) and (CV_3018) and (CV_3019)	Transport via ABC	0	0	1000	0	1		None		None	''			RIBabc				(x(360) | x(359)) & (x(361)) & (x(362)) & (x(363))
rxn05368_c	rxn05368	rxn05368		8-methyl-3-oxo-decanoyl-ACP NADP oxidoreductase	h_c + nadph_c + cpd11504_c -> nadp_c + cpd11505_c	1		1	(CV_3414) or (CV_3947) or (CV_2707) or (CV_2258) or (CV_1046) or (CV_3576) or (CV_1546) or (CV_3406)	(CV_3414) or (CV_3947) or (CV_2707) or (CV_2258) or (CV_1046) or (CV_3576) or (CV_1546) or (CV_3406)	Fatty acid biosynthesis	0	0	1000	0	1.1		None		None	''							(x(433)) | (x(556)) | (x(320)) | (x(260)) | (x(9)) | (x(468)) | (x(117)) | (x(428))
rxn00568_c	rxn00568	rxn00568		ammonium-hydroxide NADP oxidoreductase	5 h_c + 3 nadh_c + no2_c -> 2 h2o_c + 3 nad_c + nh4_c	1		1	(peg.2230) and (CV_2229)	(peg.2230) and (CV_2229)	Nitrogen metabolism	0	0	1000	0	1.1		None		None	''							(x(254)) & (x(255))
rxn00872_c	rxn00872	rxn00872		Butanoyl-CoA oxygen 2-oxidoreductase	b2coa_c + fadh2_c -> btcoa_c + fad_c	1		1	(CV_1766)	(CV_1766)	Fatty acid metabolism	0	0	1000	0	1.1		R01175		R01175	''			ACOAD1f				(x(181))
rxn09210_c	rxn09210	rxn09210		Phosphatidylserine syntase n-C18 0	ser__L_c + cdpdodecg_c -> h_c + cmp_c + ps180_c	1		1	(CV_1111)	(CV_1111)	Glycerolipid and Glycerophospholipid metabolism	0	0	1000	0	1.3		None		None	''							(x(29))
rxn12224_c	rxn12224	rxn12224		2-octaprenyl-6-methoxyphenol hydroxylase	o2_c + 2omph_c -> h2o_c + 2ombz_c	1		1	(CV_3121)	(CV_3121)	Ubiquinone biosynthesis	0	0	1000	0	1.1		None		None	''							(x(389))
rxn02405_c	rxn02405	rxn02405		CTP 3-deoxy-D-manno-octulosonate cytidylyltransferase	ctp_c + kdo_c -> ppi_c + ckdo_c	1		1	(CV_3344)	(CV_3344)	Lipopolysaccharide biosynthesis	0	0	1000	0	1.5		R03351		R03351	''			KDOCT2				(x(416))
rxn00782_c	rxn00782	rxn00782		D-Glyceraldehyde-3-phosphate NADP oxidoreductasephosphorylating	nadph_c + 13dpg_c -> pi_c + nadp_c + g3p_c	1		1	(CV_0560)	(CV_0560)	Glycolysis/Gluconeogenesis	0	0	1000	0	2.2		R01063		R01063	''			GAPD_nadp				(x(687))
rxn00395_c	rxn00395	rxn00395		L-Arginine iminohydrolase	arg__L_c + h2o_c -> nh4_c + citr__L_c	1		1	(CV_3782)	(CV_3782)	Arginine and proline metabolism	0	0	1000	0	2.2		R00552		R00552	''			None				(x(531))
rxn00171_c	rxn00171	rxn00171		acetaldehyde NAD oxidoreductase CoA-acetylating	acald_c + coa_c + nad_c <=> h_c + accoa_c + nadh_c	1		1	(CV_1137)	(CV_1137)	Pyruvate metabolism	1	-1000	1000	0	2.2		R00228		R00228	''			ACALD	ACALD			(x(39))
rxn01000_c	rxn01000	rxn01000		Prephenate hydro-lyase decarboxylating	h_c + pphn_c -> co2_c + h2o_c + phpyr_c	1		1	(CV_2355) or (CV_0224)	(CV_2355) or (CV_0224)	Phenylalanine, Tyrosine and Tryptophan biosynthesis	0	0	1000	0	1.5		R01373		R01373	''			PPNDH	PPNDH			(x(278)) | (x(245))
rxn01138_c	rxn01138	rxn01138		Adenosine orthophosphate ribosyltransferase	h_c + pi_c + adn_c -> r1p_c + ade_c	1		1	(CV_4097) or (CV_3698)	(CV_4097) or (CV_3698)	Purine metabolism	0	0	1000	0	1.5		R01561		R01561	''			PUNP1				(x(585)) | (x(505))
rxn02305_c	rxn02305	rxn02305		2-Methyl-4-amino-5-hydroxymethylpyrimidine-diphosphate 4-methyl-5-	h_c + 4mpetz_c + 2mahmp_c -> ppi_c + thmmp_c	1		1	(CV_0150)	(CV_0150)	Thiamine metabolism	0	0	1000	0	1.3		R03223		R03223	''			TMPPP				(x(91))
rxn05551_c	rxn05551	rxn05551		ethanolamine transport in/out via proton symport	h_e + etha_e <=> h_c + etha_c	1		1	(CV_1186)	(CV_1186)	Transport via Proton Symport	1	-1000	1000	0	1.5		None		None	''							(x(50))
rxn05533_c	rxn05533	rxn05533		Dipeptide transport via ABC system ala-asp	atp_c + h2o_c + ala_L_asp__L_e -> h_c + adp_c + pi_c + ala_L_asp__L_c	1		1	(CV_3936) or (CV_1097) or (CV_3426) or (CV_2688)	(CV_3936) or (CV_1097) or (CV_3426) or (CV_2688)	Transport via ABC	0	0	1000	0	1.3		None		None	''							(x(554)) | (x(25)) | (x(439)) | (x(316))
rxn01507_c	rxn01507	rxn01507		2-Deoxyadenosine 5-monophosphate phosphohydrolase	h2o_c + damp_c -> h_c + pi_c + dad_2_c	1		1	(CV_3083) or (CV_1743)	(CV_3083) or (CV_1743)	Purine metabolism	0	0	1000	0	1.5		R02088		R02088	''			NTD6				(x(381)) | (x(172))
rxn08712_c	rxn08712	rxn08712		heptosyltransferase III LPS core synthesis	adphep_LD_c + phhlipa_c -> adp_c + hphhlipa_c	1		1	(CV_0822)	(CV_0822)	Lipopolysaccharide biosynthesis	0	0	1000	0	1.1		None		None	''							(x(735))
rxn12641_c	rxn12641	rxn12641		aminopeptidase	h2o_c + L_alagly_c <=> gly_c + ala__L_c	1		1	(CV_2694) or (CV_4047) or (CV_1176) or (CV_4047) or (CV_2397) or (CV_2334) or (CV_2914)	(CV_2694) or (CV_4047) or (CV_1176) or (CV_4047) or (CV_2397) or (CV_2334) or (CV_2914)	Recycling of Peptidoglycan Amino Acids	1	-1000	1000	0	1.1		None		None	''							(x(319)) | (x(579)) | (x(47)) | (x(579)) | (x(289)) | (x(276)) | (x(353))
rxn10205_c	rxn10205	rxn10205		isoheptadecanoyl-glycerol-3-phosphate O-acyltransferase	glyc3p_c + fa11coa_c -> coa_c + cpd15671_c	1		1	(CV_3688) and (CV_3417)	(CV_3688) and (CV_3417)	Glycerolipid and Glycerophospholipid metabolism	0	0	1000	0	1.5		None		None	''							(x(498)) & (x(436))
rxn00239_c	rxn00239	rxn00239		ATP dGMP phosphotransferase	atp_c + gmp_c -> adp_c + gdp_c	1		1	(CV_3770) or (CV_1849)	(CV_3770) or (CV_1849)	Purine metabolism	0	0	1000	0	1.3		R00332		R00332	''			GK1				(x(526)) | (x(193))	Reversibility changed based on iAF1260
rxn00612_c	rxn00612	rxn00612		sn-Glycerol-3-phosphate NADP 2-oxidoreductase	h_c + nadph_c + dhap_c -> glyc3p_c + nadp_c	1		1	(CV_1129)	(CV_1129)	Glycerolipid and Glycerophospholipid metabolism	0	0	1000	0	1.4		R05680,R00844		R05680,R00844	''			None				(x(35))	Only in backward direction according to Metacyc
rxn00711_c	rxn00711	rxn00711		UMP pyrophosphate phosphoribosyltransferase	prpp_c + ura_c -> ppi_c + ump_c	1		1	(CV_3621)	(CV_3621)	Pyrimidine metabolism	0	0	1000	0	1.5		R00966		R00966	''			UPPRT				(x(479))
rxn00991_c	rxn00991	rxn00991		S-3-Hydroxy-3-methylglutaryl-CoA acetoacetate-lyase	hmgcoa_c <=> accoa_c + acac_c	1		1	(CV_1759)	(CV_1759)	Valine, Leucine and Isoleucine degradation	1	-1000	1000	0	1.3		R01360		R01360	''			HMGL				(x(177))
rxn12633_c	rxn12633	rxn12633		aminopeptidase	h2o_c + ala_L_asp__L_c <=> ala__L_c + asp__L_c	1		1	(CV_2694) or (CV_4047) or (CV_1176) or (CV_4047) or (CV_2397) or (CV_2334) or (CV_2914)	(CV_2694) or (CV_4047) or (CV_1176) or (CV_4047) or (CV_2397) or (CV_2334) or (CV_2914)	Recycling of Peptidoglycan Amino Acids	1	-1000	1000	0	1.1		None		None	''							(x(319)) | (x(579)) | (x(47)) | (x(579)) | (x(289)) | (x(276)) | (x(353))
rxn04113_c	rxn04113	rxn04113		isopentenyl-diphosphate NADP oxidoreductase	h_c + nadph_c + h2mb4p_c -> ipdp_c + h2o_c + nadp_c	1		1	(CV_3567)	(CV_3567)	Terpenoid biosynthesis	0	0	1000	0	1.5		R05884		R05884	''			IPDPS_syn				(x(463))
rxn01315_c	rxn01315	rxn01315		L-Phenylalanine tetrahydrobiopterin oxygen oxidoreductase	o2_c + phe__L_c + thbpt_c -> h2o_c + tyr__L_c + dhbpt_c	1		1	(CV_3180)	(CV_3180)	Phenylalanine, Tyrosine and Tryptophan biosynthesis	0	0	1000	0	4.2		R01795		R01795	''			PHETHPTOX				(x(394))
rxn10151_c	rxn10151	rxn10151		Aspartate transport via proton symport 2 H	2 h_e + asp__L_e -> 2 h_c + asp__L_c	1		1	(CV_3707)	(CV_3707)	Transport via Proton Symport	0	0	1000	0	1		None		None	''			ASPt2_2				(x(510))	Only forward as per SEED
rxn03174_c	rxn03174	rxn03174		2-Amino-4-hydroxy-6-erythro-1 2 3-trihydroxypropyl	cpd03666_c -> h2o_c + ahdt_c	1		1	(CV_1130) or (CV_2361)	(CV_1130) or (CV_2361)	Folate biosynthesis	0	0	1000	0	1.3		R04639		R04639	''			None				(x(36)) | (x(280))
rxn00763_c	rxn00763	rxn00763		Glycerol NAD oxidoreductase	nad_c + glyc_c <=> h_c + nadh_c + glyald_c	1		1	(CV_1137) or (CV_2728)	(CV_1137) or (CV_2728)	Glycerolipid and Glycerophospholipid metabolism	1	-1000	1000	0	2.2		R01036		R01036	''			ALCD19				(x(39)) | (x(327))
rxn05393_c	rxn05393	rxn05393		9-methyl-3-oxo-decanoyl-ACP NADP oxidoreductase	h_c + nadph_c + cpd11529_c -> nadp_c + cpd11530_c	1		1	(CV_3414) or (CV_3947) or (CV_2707) or (CV_2258) or (CV_1046) or (CV_3576) or (CV_1546) or (CV_3406)	(CV_3414) or (CV_3947) or (CV_2707) or (CV_2258) or (CV_1046) or (CV_3576) or (CV_1546) or (CV_3406)	Fatty acid biosynthesis	0	0	1000	0	1.1		None		None	''							(x(433)) | (x(556)) | (x(320)) | (x(260)) | (x(9)) | (x(468)) | (x(117)) | (x(428))
rxn00138_c	rxn00138	rxn00138		Deamino-NAD ammonia ligase AMP-forming	atp_c + nh4_c + dnad_c -> ppi_c + nad_c + amp_c	1		1	(CV_1616)	(CV_1616)	Nitrogen metabolism	0	0	1000	0	1.4		R00189		R00189	''			None				(x(145))
rxn01515_c	rxn01515	rxn01515		dTTP cytidine 5-phosphotransferase	dttp_c + cytd_c -> cmp_c + dtdp_c	1		1	(CV_1085)	(CV_1085)	Pyrimidine metabolism	0	0	1000	0	1.5		R02096		R02096	''			DTTGY				(x(23))	As per Metacyc should be forward only
rxn00338_c	rxn00338	rxn00338		L-aspartate oxidase	o2_c + asp__L_c -> h_c + h2o2_c + iasp_c	1		1	(CV_3930)	(CV_3930)	Nicotinate and nicotinamide metabolism	0	0	1000	0	1.1		R00481		R00481	''			ASPO6				(x(553))
rxn03397_c	rxn03397	rxn03397		UDP-L-rhamnose flavonol-3-O-D-glucoside L-rhamnosyltransferase	amet_c + 2ombz_c -> h_c + 2ommb_c + ahcys_c	1		1	(CV_0989)	(CV_0989)	Ubiquinone biosynthesis	0	0	1000	0	1.3		R04990		R04990	''			URFGTT				(x(783))
rxn03136_c	rxn03136	rxn03136		1-5-Phosphoribosyl-5-amino-4-N-succinocarboxamide-imidazole	25aics_c -> fum_c + aicar_c	1		1	(CV_3834)	(CV_3834)	Purine metabolism	0	0	1000	0	1.5		R04559		R04559	''			ADSL2r				(x(540))
rxn05165_c	rxn05165	rxn05165		L-Proline-ABC transport	atp_c + h2o_c + pro__L_e -> h_c + adp_c + pi_c + pro__L_c	1		1	(CV_1197)	(CV_1197)	Transport via ABC	0	0	1000	0	1.5		None		None	''			PROabc				(x(52))
rxn00216_c	rxn00216	rxn00216		ATP D-glucose 6-phosphotransferase	atp_c + glc__D_c -> adp_c + g6p_c	1		1	(CV_0147)	(CV_0147)	Glycolysis/Gluconeogenesis	0	0	1000	0	1.4		R00299,R01786		R00299,R01786	''			HEX1	HEX1			(x(83))	Reversibility changed based on iAF1260
rxn08194_c	rxn08194	rxn08194		cobIalamin adenosyltransferase	atp_c + cbl1_c <=> pppi_c + adocbl_c	1		1	(CV_1557) or (CV_2911)	(CV_1557) or (CV_2911)	Porphyrin and chlorophyll metabolism	1	-1000	1000	0	1.3		R01492		R01492	''			CBLAT				(x(121)) | (x(352))	Reversibility changed based on iAF1260
rxn05440_c	rxn05440	rxn05440		7-methyl-trans-oct-2-enoyl-ACP NAD oxidoreductase A-specific	h_c + nadh_c + cpd11527_c -> nad_c + cpd11528_c	1		1	(CV_1583) or (CV_3743)	(CV_1583) or (CV_3743)	Fatty acid biosynthesis	0	0	1000	0	1.1		None		None	''							(x(134)) | (x(516))
rxn00988_c	rxn00988	rxn00988		Acetoacetate CoA ligase AMP-forming	h_c + atp_c + coa_c + acac_c -> ppi_c + amp_c + aacoa_c	1		1	(CV_1780) or ((CV_1758) and (CV_0898 or CV_1780 or CV_0093 or CV_1486 or CV_2802 or CV_2803 or CV_4051 or CV_1459))	(CV_1780) or ((CV_1758) and (CV_0898 or CV_1780 or CV_0093 or CV_1486 or CV_2802 or CV_2803 or CV_4051 or CV_1459))	Butanoate metabolism	0	0	1000	0	1.3		R01357		R01357	''			AACOAT				(x(182)) | (x(176)) & (x(747) | x(182) | x(742) | x(101) | x(342) | x(343) | x(580) | x(96))
rxn08557_c	rxn08557	rxn08557		glycerol-3-phosphate dehydrogenase menaquinone-8	glyc3p_c + mqn8_c -> mql8_c + dhap_c	1		1	(CV_0254)	(CV_0254)	Oxidative phosphorylation	0	0	1000	0	1.3		None		None	''							(x(303))
rxn04996_c	rxn04996	rxn04996		dimethyallyl diphosphate NADP oxidoreductase	h_c + nadph_c + h2mb4p_c -> h2o_c + nadp_c + dmpp_c	1		1	(CV_3567)	(CV_3567)	Isoprenoid Biosynthesis	0	0	1000	0	1.5		R07219		R07219	''			DMPPS_syn				(x(463))
rxn05236_c	rxn05236	rxn05236		Ribonucleotide reductase UTP	trdrd_c + utp_c -> h2o_c + trdox_c + dutp_c	1		1	(CV_2412)	(CV_2412)	Pyrimidine metabolism	0	0	1000	0	1.5		R02023		R02023	''			RNTR4				(x(291))
rxn00606_c	rxn00606	rxn00606		alpha alpha-Trehalose-6-phosphate phosphoglucohydrolase	h2o_c + tre6p_c <=> g6p_c + glc__D_c	1		1	(CV_3299)	(CV_3299)	Starch and sucrose metabolism	1	-1000	1000	0	1.5		R00837		R00837	''			TRE6PH				(x(409))
rxn02835_c	rxn02835	rxn02835		1-5-phospho-D-ribosyl-AMP 1 6-hydrolase	h2o_c + prbamp_c -> prfp_c	1		1	(CV_0620) and (CV_0621)	(CV_0620) and (CV_0621)	Histidine metabolism	0	0	1000	0	1.5		R04037		R04037	''			PRAMPC				(x(706)) & (x(707))
rxn02373_c	rxn02373	rxn02373		L-Glutamate-5-semialdehyde NADP 5-oxidoreductase phosphorylationg	nadph_c + glu5p_c -> pi_c + nadp_c + glu5sa_c	1		1	(CV_4289)	(CV_4289)	Urea cycle and metabolism of amino groups	0	0	1000	0	1.3		R03313		R03313	''			G5SD				(x(639))
rxn05581_c	rxn05581	rxn05581		glycerol transport in/out via diffusion reversible	glyc_c <=> glyc_e	1		1	(CV_0252)	(CV_0252)	Transport via diffusion	1	-1000	1000	0	1		None		None	''							(x(298))
rxn00726_c	rxn00726	rxn00726		Chorismate pyruvate-lyase amino-accepting	chor_c + nh4_c -> h_c + h2o_c + pyr_c + anth_c	1		1	(CV_2179) and (CV_2175)	(CV_2179) and (CV_2175)	Phenylalanine, Tyrosine and Tryptophan biosynthesis	0	0	1000	0	1.5		R00985		R00985	''			None				(x(243)) & (x(242))
rxn05287_c	rxn05287	rxn05287		geranylfarnesyl diphosphate synthase	ipdp_c + ggdp_c -> ppi_c + pendp_c	1		1	(CV_0847) or (CV_2691) or (CV_3954)	(CV_0847) or (CV_2691) or (CV_3954)	Isoprenoid Biosynthesis	0	0	1000	0	1.5		R07475		R07475	''			GGTT				(x(738)) | (x(317)) | (x(560))
rxn05345_c	rxn05345	rxn05345		dodecanoyl-acyl-carrier-protein malonyl-acyl-carrier-protein	h_c + malACP_c + ddcaACP_c -> co2_c + ACP_c + 3omrsACP_c	1		1	(CV_3412 or CV_3948 or CV_1541 or CV_3949) and (CV_3416 or CV_1096 or CV_0805)	(CV_3412 or CV_3948 or CV_1541 or CV_3949) and (CV_3416 or CV_1096 or CV_0805)	Fatty acid biosynthesis	0	0	1000	0	1.3		R04726		R04726	''			3OAS140				(x(432) | x(557) | x(115) | x(558)) & (x(435) | x(24) | x(730))
rxn03147_c	rxn03147	rxn03147		1-5-Phosphoribosyl-5-amino-4-carboxyimidazole L-aspartate ligase	atp_c + 5aizc_c + asp__L_c -> 2 h_c + adp_c + pi_c + 25aics_c	1		1	(CV_0165)	(CV_0165)	Purine metabolism	0	0	1000	0	1.5		R04591		R04591	''			PRASCSi				(x(131))
rxn02911_c	rxn02911	rxn02911		S-3-Hydroxydodecanoyl-CoA hydro-lyase	3hddcoa_c <=> h2o_c + dd2coa_c	1		1	(CV_2720) or (CV_1553) or (CV_2485)	(CV_2720) or (CV_1553) or (CV_2485)	Fatty acid metabolism	1	-1000	1000	0	1.1		R04170		R04170	''			ECOAH5				(x(323)) | (x(118)) | (x(302))
rxn01211_c	rxn01211	rxn01211		5 10-Methenyltetrahydrofolate 5-hydrolasedecyclizing	h2o_c + methf_c <=> h_c + 10fthf_c	1		1	(CV_1925) and (CV_1925)	(CV_1925) and (CV_1925)	Folate biosynthesis	1	-1000	1000	0	1.5		R01655		R01655	''			MTHFC_1				(x(200)) & (x(200))
rxn03884_c	rxn03884	rxn03884		2-dehydro-3-deoxy-D-gluconate-6-phosphate	2ddg6p_c <=> g3p_c + pyr_c	1		1	(CV_0143)	(CV_0143)	Pentose Phosphate Pathway	1	-1000	1000	0	2.2		R05605		R05605	''			EDA	EDA			(x(72))	As per Metacyc should be forward only					but irrev in iDB149
rxn01602_c	rxn01602	rxn01602		Dihydrofolate NADP oxidoreductase	nadp_c + dhf_c <=> h_c + nadph_c + fol_c	1		1	(CV_3295) or (CV_1028) or (CV_4132)	(CV_3295) or (CV_1028) or (CV_4132)	Folate biosynthesis	1	-1000	1000	0	1.3		R02236		R02236	''			FOLR2_1				(x(408)) | (x(7)) | (x(592))
rxn00670_c	rxn00670	rxn00670		acetyl-CoA phosphate acetyltransferase	h_c + pi_c + ppcoa_c <=> coa_c + ppap_c	1		1	(CV_1530)	(CV_1530)	Propanoate metabolism	1	-1000	1000	0	1.5		R00921		R00921	''			PTA2				(x(111))
rxn00371_c	rxn00371	rxn00371		Formate NAD oxidoreductase	nad_c + for_c -> co2_c + nadh_c	1		1	(CV_1622) or (CV_3840) or (CV_3841) or (CV_3839) or (CV_1624)	(CV_1622) or (CV_3840) or (CV_3841) or (CV_3839) or (CV_1624)	Glyoxylate and dicarboxylate metabolism	0	0	1000	0	1.5		R00519		R00519	''			FDH				(x(146)) | (x(542)) | (x(543)) | (x(541)) | (x(147))
rxn00539_c	rxn00539	rxn00539		Ethanolamine ammonia-lyase	etha_c -> acald_c + nh4_c	1		1	(CV_1184) or (CV_1185)	(CV_1184) or (CV_1185)	Glycerolipid and Glycerophospholipid metabolism	0	0	1000	0	1.5		R00749		R00749	''			None				(x(48)) | (x(49))
rxn01924_c	rxn01924	rxn01924		2-Methylpropanoyl-CoA acceptor 2 3-oxidoreductase	2mp2coa_c + fadh2_c -> ibcoa_c + fad_c	1		1	(CV_2084)	(CV_2084)	Valine, Leucine and Isoleucine degradation	0	0	1000	0	1.5		None		None	''							(x(230))
rxn11946_c	rxn11946	rxn11946		3-demethylubiquinone-9 3-o-methyltransferase	cpd03449_c + amet_c -> q8_c + ahcys_c	1		1	(CV_1031)	(CV_1031)	Ubiquinone biosynthesis	0	0	1000	0	1.3		R05614		R05614	''			None				(x(8))
rxn05444_c	rxn05444	rxn05444		15-methyl-trans-hexa-dec-2-enoyl-ACP NAD oxidoreductase A-specific	h_c + nadh_c + cpd11543_c -> nad_c + cpd11544_c	1		1	(CV_1583) or (CV_3743)	(CV_1583) or (CV_3743)	Fatty acid biosynthesis	0	0	1000	0	1.1		None		None	''							(x(134)) | (x(516))
rxn00941_c	rxn00941	rxn00941		Nicotinamide-nucleotide pyrophosphate	atp_c + h2o_c + prpp_c + ncam_c -> ppi_c + adp_c + pi_c + nmn_c	1		1	(CV_0034)	(CV_0034)	Nicotinate and nicotinamide metabolism	0	0	1000	0	1.1		R01271		R01271	''			NMNS				(x(358))	As per Metacyc should be forward only					Modified as per metacyc and in forward direction and changed nac to ncam to balnce reaction according to KEGG
rxn00650_c	rxn00650	rxn00650		membrane alanyl aminopeptidase	h2o_c + cgly_c <=> gly_c + cys__L_c	1		1	(CV_2694) or (CV_4047) or (CV_1176) or (CV_4047) or (CV_2397) or (CV_2334) or (CV_2914)	(CV_2694) or (CV_4047) or (CV_1176) or (CV_4047) or (CV_2397) or (CV_2334) or (CV_2914)	Glutathione metabolism	1	-1000	1000	0	1.4		R00899		R00899	''			AMPTASECG				(x(319)) | (x(579)) | (x(47)) | (x(579)) | (x(289)) | (x(276)) | (x(353))
rxn01241_c	rxn01241	rxn01241		Dihydrolipoamide NAD oxidoreductase	nad_c + dhlam_c -> h_c + nadh_c + lpam_c	1		1	(CV_2037) or (CV_1074) or (CV_0528)	(CV_2037) or (CV_1074) or (CV_0528)	TCA Cycle	0	0	1000	0	2.2		R07618,R01698		R07618,R01698	''			None				(x(221)) | (x(19)) | (x(679))	As per Metacyc should be forward only
rxn01117_c	rxn01117	rxn01117		D-Arabinose-5-phosphate ketol-isomerase	ru5p__D_c -> ara5p_c	1		1	(CV_3327)	(CV_3327)	Lipopolysaccharide biosynthesis	0	0	1000	0	1.5		R01530		R01530	''			A5PISO				(x(412))
rxn00836_c	rxn00836	rxn00836		IMP pyrophosphate phosphoribosyltransferase	prpp_c + hxan_c -> ppi_c + imp_c	1		1	(CV_3900)	(CV_3900)	Purine metabolism	0	0	1000	0	1.5		R01132		R01132	''			HXPRT				(x(547))
rxn12646_c	rxn12646	rxn12646		aminopeptidase	h2o_c + gly_gln__L_c <=> gly_c + gln__L_c	1		1	(CV_2694) or (CV_4047) or (CV_1176) or (CV_4047) or (CV_2397) or (CV_2334) or (CV_2914)	(CV_2694) or (CV_4047) or (CV_1176) or (CV_4047) or (CV_2397) or (CV_2334) or (CV_2914)	Recycling of Peptidoglycan Amino Acids	1	-1000	1000	0	1.1		None		None	''							(x(319)) | (x(579)) | (x(47)) | (x(579)) | (x(289)) | (x(276)) | (x(353))
rxn09296_c	rxn09296	rxn09296		hydrogen peroxide reductase thioredoxin	trdrd_c + h2o2_c -> 2 h2o_c + trdox_c	1		1	(CV_1584) or (CV_1106)	(CV_1584) or (CV_1106)	Glycine, Serine and Threonine metabolism	0	0	1000	0	1.1		None		None	''							(x(135)) | (x(28))
rxn01255_c	rxn01255	rxn01255		5-O-1-Carboxyvinyl-3-phosphoshikimate phosphate-lyase	3psme_c -> h_c + pi_c + chor_c	1		1	(CV_1187)	(CV_1187)	Phenylalanine, Tyrosine and Tryptophan biosynthesis	0	0	1000	0	1.5		R01714		R01714	''			CHORS	CHORS			(x(51))
rxn03194_c	rxn03194	rxn03194		S-2-Aceto-2-hydroxybutanoate pyruvate-lyase carboxylating	2obut_c + 2ahethmpp_c -> 2ahbut_c + thmpp_c	1		1	(CV_0587) and (CV_3889 or CV_0586)	(CV_0587) and (CV_3889 or CV_0586)	Valine, Leucine and Isoleucine Biosynthesis	0	0	1000	0	1.5		R04673		R04673	''			ACAS_2ahbut				(x(692)) & (x(546) | x(691))
rxn01360_c	rxn01360	rxn01360		S-Dihydroorotate oxygen oxidoreductase	o2_c + dhor__S_c -> h2o2_c + orot_c	1		1	(CV_1812) or (CV_3551)	(CV_1812) or (CV_3551)	Pyrimidine metabolism	0	0	1000	0	1.5		R01867		R01867	''			DHORDfum				(x(187)) | (x(459))
rxn02927_c	rxn02927	rxn02927		N2-succinyl-L-arginine iminohydrolase decarboxylating	2 h_c + 2 h2o_c + sucarg_c -> co2_c + sucorn_c + 2 nh4_c	1		1	(CV_1500)	(CV_1500)	Arginine and proline metabolism	0	0	1000	0	1.5		R04189		R04189	''			None				(x(106))
rxn03958_c	rxn03958	rxn03958		1-Deoxy-D-xylulose-5-phosphate isomeroreductase	h_c + nadph_c + dxyl5p_c -> nadp_c + 2me4p_c	1		1	(CV_2202)	(CV_2202)	Terpenoid biosynthesis	0	0	1000	0	1.5		R05688		R05688	''			DXPRli				(x(249))
rxn05433_c	rxn05433	rxn05433		4-methyl-trans-hex-2-enoyl-ACP NAD oxidoreductase A-specific	h_c + nadh_c + cpd11498_c -> nad_c + cpd11499_c	1		1	(CV_1583) or (CV_3743)	(CV_1583) or (CV_3743)	Fatty acid biosynthesis	0	0	1000	0	1.1		None		None	''							(x(134)) | (x(516))
rxn05373_c	rxn05373	rxn05373		10-methyl-3-hydroxy-dodecanoyl-ACP hydro-lyase	cpd11509_c -> h2o_c + cpd11510_c	1		1	(CV_3950) or (CV_2207)	(CV_3950) or (CV_2207)	Fatty acid biosynthesis	0	0	1000	0	1.5		None		None	''							(x(559)) | (x(251))
rxn05465_c	rxn05465	rxn05465		malonyl-ACP acyl-carrier-protein transferase	ACP_c + malcoa_c -> coa_c + malACP_c	1		1	(CV_3415)	(CV_3415)	Fatty acid biosynthesis	0	0	1000	0	3.2		R01626		R01626	''			MCOATA				(x(434))
rxn05452_c	rxn05452	rxn05452		14-methyl-hexa-decanoyl-ACP acyl-carrier-protein transferase	coa_c + cpd11519_c -> fa12coa_c + ACP_c	1		1	(CV_3415)	(CV_3415)	Fatty acid biosynthesis	0	0	1000	0	1.1		None		None	''							(x(434))
rxn00392_c	rxn00392	rxn00392		ATP riboflavin 5-phosphotransferase	atp_c + ribflv_c -> adp_c + fmn_c	1		1	(CV_3570) and (CV_3570)	(CV_3570) and (CV_3570)	Riboflavin metabolism	0	0	1000	0	1.5		R00549		R00549	''			RBFK				(x(465)) & (x(465))	Reversibility changed based on iAF1260
rxn02400_c	rxn02400	rxn02400		Nicotinate D-ribonucleotide phosphohydrolase	h2o_c + nicrnt_c -> h_c + pi_c + nicrns_c	1		1	(CV_3083) or (CV_1743)	(CV_3083) or (CV_1743)	Nicotinate and nicotinamide metabolism	0	0	1000	0	1.5		R03346		R03346	''			NT5C				(x(381)) | (x(172))
rxn01280_c	rxn01280	rxn01280		R-Glycerate NAD oxidoreductase	nad_c + glyc__R_c <=> h_c + nadh_c + 2h3oppan_c	1		1	(CV_3870)	(CV_3870)	Glyoxylate and dicarboxylate metabolism	1	-1000	1000	0	1.1		R01745		R01745	''			TRSARr				(x(544))
rxn01670_c	rxn01670	rxn01670		Nicotinamide ribonucleotide phosphohydrolase	h2o_c + nmn_c -> h_c + pi_c + rnam_c	1		1	(CV_3083) or (CV_1743)	(CV_3083) or (CV_1743)	Nicotinate and nicotinamide metabolism	0	0	1000	0	1.5		R02323		R02323	''			NMNHYD				(x(381)) | (x(172))
rxn05336_c	rxn05336	rxn05336		3R-3-Hydroxypalmitoyl-acyl-carrier-protein NADP oxidoreductase	nadp_c + 3hpalmACP_c <=> h_c + nadph_c + 3opalmACP_c	1		1	(CV_3414) or (CV_3947) or (CV_2707) or (CV_2258) or (CV_1046) or (CV_3576) or (CV_1546) or (CV_3406)	(CV_3414) or (CV_3947) or (CV_2707) or (CV_2258) or (CV_1046) or (CV_3576) or (CV_1546) or (CV_3406)	Fatty acid biosynthesis	1	-1000	1000	0	1.3		R04543		R04543	''			3OAR160				(x(433)) | (x(556)) | (x(320)) | (x(260)) | (x(9)) | (x(468)) | (x(117)) | (x(428))
rxn02287_c	rxn02287	rxn02287		S-Adenosyl-L-methionine uroporphyrin-III C-methyltransferase	2 amet_c + uppg3_c -> 2 h_c + 2 ahcys_c + pre2_c	1		1	(CV_1569) or (CV_0813)	(CV_1569) or (CV_0813)	Porphyrin and chlorophyll metabolism	0	0	1000	0	2.2		R03194		R03194	''			UPP3MT				(x(129)) | (x(731))
rxn02475_c	rxn02475	rxn02475		2 5-Diamino-6-hydroxy-4-5-phosphoribosylamino-pyrimidine	h_c + h2o_c + 25drapp_c -> nh4_c + 5apru_c	1		1	(CV_1290) and (CV_1290)	(CV_1290) and (CV_1290)	Riboflavin metabolism	0	0	1000	0	1.5		R03459		R03459	''			None				(x(66)) & (x(66))
rxn00147_c	rxn00147	rxn00147		ATP pyruvate water phosphotransferase	atp_c + h2o_c + pyr_c -> h_c + pi_c + pep_c + amp_c	1		1	(CV_3709)	(CV_3709)	Pyruvate metabolism	0	0	1000	0	2.2		R00199		R00199	''			PPS	PPS			(x(511))
rxn05312_c	rxn05312	rxn05312		PIt6	h_c + pi_c -> h_e + pi_e	1		1	(CV_0934)	(CV_0934)	Transport	0	0	1000	0	1.5		None		None	''			PIt2r	PIt2r			(x(753))
rxn02774_c	rxn02774	rxn02774		S-Adenosyl-L-methionine uroporphyrin-III C-methyltransferase	nad_c + pre2_c -> h_c + nadh_c + scl_c	1		1	(CV_1569) or (CV_0813) or (CV_0813)	(CV_1569) or (CV_0813) or (CV_0813)	Porphyrin and chlorophyll metabolism	0	0	1000	0	1		R03947		R03947	''			SHCDD2				(x(129)) | (x(731)) | (x(731))
rxn05325_c	rxn05325	rxn05325		Octanoyl-acyl-carrier protein malonyl-CoA	h_c + nadh_c + toct2eACP_c -> nad_c + ocACP_c	1		1	(CV_1583) or (CV_3743)	(CV_1583) or (CV_3743)	Fatty acid biosynthesis	0	0	1000	0	2.2		R04958		R04958	''			EAR80x				(x(134)) | (x(516))
rxn01510_c	rxn01510	rxn01510		dGTP cytidine 5-phosphotransferase	cytd_c + dgtp_c -> cmp_c + dgdp_c	1		1	(CV_1085)	(CV_1085)	Pyrimidine metabolism	0	0	1000	0	1.5		R02091		R02091	''			DGTCY				(x(23))	As per Metacyc should be forward only
rxn09240_c	rxn09240	rxn09240		Sulfate adenyltransferase	atp_c + h2o_c + gtp_c + so4_c -> ppi_c + pi_c + gdp_c + aps_c	1		1	(CV_2306) and (CV_2307)	(CV_2306) and (CV_2307)	Inorganic Sulfur Assimilation/Cysteine Biosynthesis	0	0	1000	0	1.5		None		None	''			SADT2				(x(267)) & (x(268))	Reversibility changed based on iAF1260
rxn00471_c	rxn00471	rxn00471		L-Ornithine ammonia-lyasecyclizing	orn_c -> h_c + pro__L_c + nh4_c	1		1	(CV_3249)	(CV_3249)	Arginine and proline metabolism	0	0	1000	0	1.5		R00671		R00671	''			None				(x(403))
rxn03408_c	rxn03408	rxn03408		UDP-N-acetylglucosamine-N-acetylmuramyl-pentapeptidepyrophosphoryl-undecaprenol N-acetylglucosamine transferase	uacgam_c + uagmda_c -> uaagmda_c + udp_c	1		1	(CV_4343)	(CV_4343)	Peptidoglycan biosynthesis	0	0	1000	0	1.3		R05032		R05032	''			UAGPT3				(x(647))
rxn05156_c	rxn05156	rxn05156		L-Ornithine-ABC transport	atp_c + h2o_c + orn_e -> h_c + adp_c + pi_c + orn_c	1		1	(CV_3085)	(CV_3085)	Transport via ABC	0	0	1000	0	1		None		None	''			ORNabc				(x(383))
rxn00441_c	rxn00441	rxn00441		2-Oxoglutarate Thiamin diphosphate 2-oxidoreductasedecarboxylating	h_c + akg_c + thmpp_c -> co2_c + HC01435_c	1		1	(CV_1071)	(CV_1071)	TCA Cycle	0	0	1000	0	2.2		R00621		R00621	''			None				(x(17))
rxn01485_c	rxn01485	rxn01485		D-Glucosamine 1-phosphate 1 6-phosphomutase	gam1p_c <=> gam6p_c	1		1	(CV_3795)	(CV_3795)	Aminosugars metabolism	1	-1000	1000	0	1.5		R02060		R02060	''			PGAMT				(x(535))
rxn01987_c	rxn01987	rxn01987		Deoxyribokinase	adp_c + 2dr5p_c -> atp_c + drib_c	1		1	(CV_3020)	(CV_3020)	Pentose Phosphate Pathway	0	0	1000	0	1.3		R02750		R02750	''			None				(x(364))	Reversibility changed based on iAF1260
rxn05540_c	rxn05540	rxn05540		Dipeptide transport via ABC system ala-gln	atp_c + h2o_c + ala_L_gln__L_e -> h_c + adp_c + pi_c + ala_L_gln__L_c	1		1	(CV_3936) or (CV_1097) or (CV_3426) or (CV_2688)	(CV_3936) or (CV_1097) or (CV_3426) or (CV_2688)	Transport via ABC	0	0	1000	0	1.3		None		None	''							(x(554)) | (x(25)) | (x(439)) | (x(316))
rxn00363_c	rxn00363	rxn00363		Cytidine-5-monophosphate phosphohydrolase	h2o_c + cmp_c -> h_c + pi_c + cytd_c	1		1	(CV_3083) or (CV_1743)	(CV_3083) or (CV_1743)	Pyrimidine metabolism	0	0	1000	0	1.5		R00511		R00511	''			NTD4				(x(381)) | (x(172))
rxn01629_c	rxn01629	rxn01629		S-4-Amino-5-oxopentanoate 4 5-aminomutase	5aop_c <=> glu1sa_c	1		1	(CV_0067)	(CV_0067)	Porphyrin and chlorophyll metabolism	1	-1000	1000	0	1.5		R02272		R02272	''			G1SAT				(x(708))
rxn00552_c	rxn00552	rxn00552		D-Glucosamine-6-phosphate ketol-isomerasedeaminating	h2o_c + gam6p_c -> f6p_c + nh4_c	1		1	(CV_0557)	(CV_0557)	Aminosugars metabolism	0	0	1000	0	1.5		R00765		R00765	''			None				(x(684))
rxn10204_c	rxn10204	rxn10204		stearoyl-glycerol-3-phosphate O-acyltransferase	glyc3p_c + stcoa_c -> coa_c + 1odecg3p_c	1		1	(CV_3688) and (CV_3417)	(CV_3688) and (CV_3417)	Glycerolipid and Glycerophospholipid metabolism	0	0	1000	0	1.5		None		None	''							(x(498)) & (x(436))
rxn05179_c	rxn05179	rxn05179		L-Isoleucine-ABC transport	atp_c + h2o_c + ile__L_e -> h_c + adp_c + pi_c + ile__L_c	1		1	(CV_0405) or (CV_2481) or (CV_1503)	(CV_0405) or (CV_2481) or (CV_1503)	Transport via ABC	0	0	1000	0	1.3		None		None	''							(x(581)) | (x(300)) | (x(107))
rxn05151_c	rxn05151	rxn05151		L-Lysine-ABC transport	atp_c + h2o_c + lys__L_e -> h_c + adp_c + pi_c + lys__L_c	1		1	(CV_3085)	(CV_3085)	Transport via ABC	0	0	1000	0	1		None		None	''			LYSabc				(x(383))
rxn01548_c	rxn01548	rxn01548		guanosine orthophosphate ribosyltransferase	h_c + pi_c + gsn_c -> gua_c + r1p_c	1		1	(CV_4097) or (CV_3698)	(CV_4097) or (CV_3698)	Purine metabolism	0	0	1000	0	1.5		R02147		R02147	''			PUNP3				(x(585)) | (x(505))	As per Metacyc should be forward only
rxn05377_c	rxn05377	rxn05377		12-methyl-3-hydroxy-tetra-decanoyl-ACP hydro-lyase	cpd11513_c -> h2o_c + cpd11514_c	1		1	(CV_3950) or (CV_2207)	(CV_3950) or (CV_2207)	Fatty acid biosynthesis	0	0	1000	0	1.5		None		None	''							(x(559)) | (x(251))
rxn05459_c	rxn05459	rxn05459		stearyl-ACP acyl-carrier-protein transferase	coa_c + cpd11573_c -> ACP_c + stcoa_c	1		1	(CV_3415)	(CV_3415)	Fatty acid biosynthesis	0	0	1000	0	1.1		None		None	''							(x(434))
rxn00966_c	rxn00966	rxn00966		chorismate pyruvate-lyase 4-hydroxybenzoate-forming	chor_c -> pyr_c + 4hbz_c	1		1	(peg.3634)	(peg.3634)	Ubiquinone biosynthesis	0	0	1000	0	1.3		R01302		R01302	''			CHRPL				(x(473))
rxn01451_c	rxn01451	rxn01451		S-3-Hydroxybutanoyl-CoA NAD oxidoreductase	nad_c + 3hbcoa_c <=> h_c + nadh_c + aacoa_c	1		1	(CV_2720)	(CV_2720)	Lysine degradation	1	-1000	1000	0	1.3		R01975		R01975	''			HACD1i				(x(323))
rxn00785_c	rxn00785	rxn00785		D-Fructose 6-phosphate D-glyceraldehyde-3-phosphate glycolaldehyde	g3p_c + f6p_c -> xu5p__D_c + e4p_c	1		1	(CV_2257) or (CV_0191)	(CV_2257) or (CV_0191)	Pentose Phosphate Pathway	0	0	1000	0	2.2		R01830,R01067		R01830,R01067	''			TKT2	TKT2			(x(259)) | (x(192))	Only in backward direction according to Biocyc					reversible in iDB149
rxn05323_c	rxn05323	rxn05323		Tetradecanoyl-acyl-carrier protein malonyl-CoA	h_c + nadh_c + tmrs2eACP_c -> nad_c + myrsACP_c	1		1	(CV_1583) or (CV_3743)	(CV_1583) or (CV_3743)	Fatty acid biosynthesis	0	0	1000	0	2.2		R04966		R04966	''			EAR140x				(x(134)) | (x(516))
rxn03084_c	rxn03084	rxn03084		5-Phosphoribosylformylglycinamide L-glutamine amido-ligase	atp_c + h2o_c + gln__L_c + fgam_c -> h_c + adp_c + pi_c + glu__L_c + fpram_c	1		1	(CV_2044) and (CV_2044)	(CV_2044) and (CV_2044)	Purine metabolism	0	0	1000	0	1.5		R04463		R04463	''			PRFGS				(x(224)) & (x(224))
rxn00011_c	rxn00011	rxn00011		pyruvate thiamin diphosphate acetaldehydetransferase	h_c + pyr_c + thmpp_c -> co2_c + 2ahethmpp_c	1		1	((CV_0587) and (CV_3889 or CV_0586)) or (CV_0526)	((CV_0587) and (CV_3889 or CV_0586)) or (CV_0526)	TCA Cycle	0	0	1000	0	1.5		R00014		R00014	''			PDHam1hi				(x(692)) & (x(546) | x(691)) | (x(677))						Bigg Id rxn in chloroplast
rxn05466_c	rxn05466	rxn05466		Ammonia transport via diffusion	nh4_e <=> nh4_c	1		1	(CV_4003)	(CV_4003)	Transport via diffusion	1	-1000	1000	0	1.3		None		None	''			NH4t	NH4t			(x(567))	Reversible for formation of other metabolites
rxn05398_c	rxn05398	rxn05398		11-methyl-3-hydroxy-dodecanoyl-ACP hydro-lyase	cpd11534_c -> h2o_c + cpd11535_c	1		1	(CV_3950) or (CV_2207)	(CV_3950) or (CV_2207)	Fatty acid biosynthesis	0	0	1000	0	1.5		None		None	''							(x(559)) | (x(251))
rxn10161_c	rxn10161	rxn10161		Octadecanoate transport via proton symport	h_e + ocdca_e -> h_c + ocdca_c	1		1	(CV_3183) or (CV_2721)	(CV_3183) or (CV_2721)	Transport via Proton Symport	0	0	1000	0	1.5		None		None	''							(x(395)) | (x(324))	Reversibility changed for BIOLOG data corrections
rxn00708_c	rxn00708	rxn00708		Uridine 5-monophosphate phosphohydrolase	ump_c + h2o_c -> h_c + uri_c + pi_c	1		1	(CV_3083) or (CV_1743)	(CV_3083) or (CV_1743)	Pyrimidine metabolism	0	0	1000	0	1.5		R00963		R00963	''			NTD2				(x(381)) | (x(172))
rxn01513_c	rxn01513	rxn01513		ATP dTMP phosphotransferase	atp_c + dtmp_c -> adp_c + dtdp_c	1		1	(CV_3723)	(CV_3723)	Pyrimidine metabolism	0	0	1000	0	1.5		R02094		R02094	''			DTMPK				(x(514))
rxn02476_c	rxn02476	rxn02476		Phosphoenolpyruvate 3-phosphoshikimate	pep_c + skm5p_c -> h_c + pi_c + 3psme_c	1		1	(CV_3048)	(CV_3048)	Phenylalanine, Tyrosine and Tryptophan biosynthesis	0	0	1000	0	1.1		R03460		R03460	''			PSCVT	PSCVT			(x(371))
rxn05333_c	rxn05333	rxn05333		3R-3-Hydroxybutanoyl-acyl-carrier-protein hydro-lyase	3hdecACP_c -> h2o_c + tdec2eACP_c	1		1	(CV_3950) or (CV_2207)	(CV_3950) or (CV_2207)	Fatty acid biosynthesis	0	0	1000	0	1.5		R04535		R04535	''			3HAD100				(x(559)) | (x(251))
rxn01870_c	rxn01870	rxn01870		D-Fructose 1-phosphate D-glyceraldehyde-3-phosphate-lyase	f1p_c <=> dhap_c + glyald_c	1		1	(CV_0187)	(CV_0187)	Fructose and Mannose metabolism	1	-1000	1000	0	2.2		R02568		R02568	''			FBA2				(x(183))
rxn04954_c	rxn04954	rxn04954		5-methyltetrahydrofolate NAD oxidoreductase	h_c + nadh_c + mlthf_c -> nad_c + 5mthf_c	1		1	(CV_0966)	(CV_0966)	One carbon pool by folate	0	0	1000	0	1.5		R07168		R07168	''			MTHFO				(x(778))	Only in backward direction according to Metacyc
rxn01575_c	rxn01575	rxn01575		L-Isoleucine 2-oxoglutarate aminotransferase	glu__L_c + 3mop_c -> akg_c + ile__L_c	1		1	(CV_2094)	(CV_2094)	Valine, Leucine and Isoleucine degradation	0	0	1000	0	1.5		R02199		R02199	''			BCTA				(x(235))
rxn02342_c	rxn02342	rxn02342		2-alpha-Hydroxyethylthiamine diphosphate lipoamide	lpam_c + 2ahethmpp_c <=> thmpp_c + adhlam_c	1		1	(CV_0526)	(CV_0526)	TCA Cycle	1	-1000	1000	0	1.5		R03270		R03270	''			None				(x(677))
rxn00781_c	rxn00781	rxn00781		D-Glyceraldehyde-3-phosphate NAD oxidoreductasephosphorylating	nad_c + pi_c + g3p_c <=> nadh_c + 13dpg_c	1		1	(CV_0560) or (CV_0190)	(CV_0560) or (CV_0190)	Glycolysis/Gluconeogenesis	1	-1000	1000	0	2.2		R01061		R01061	''			GAPD	GAPD			(x(687)) | (x(189))
rxn00973_c	rxn00973	rxn00973		citrate hydro-lyase	cit_c <=> icit_c	1		1	(CV_1121) and (CV_2470) and (CV_1121)	(CV_1121) and (CV_2470) and (CV_1121)	TCA Cycle	1	-1000	1000	0	2.2		R01324		R01324	''			None				(x(32)) & (x(296)) & (x(32))
rxn05181_c	rxn05181	rxn05181		Betaine-ABC transport	atp_c + h2o_c + glyb_e -> h_c + adp_c + pi_c + glyb_c	1		1	(CV_1197)	(CV_1197)	Transport via ABC	0	0	1000	0	1.3		None		None	''							(x(52))
rxn01985_c	rxn01985	rxn01985		Deoxyinosine orthophosphate ribosyltransferase	h_c + pi_c + din_c <=> 2dr1p_c + hxan_c	1		1	(CV_4097) or (CV_3698)	(CV_4097) or (CV_3698)	Purine metabolism	1	-1000	1000	0	1.5		R02748		R02748	''			PUNP6				(x(585)) | (x(505))
rxn00364_c	rxn00364	rxn00364		ATP CMP phosphotransferase	atp_c + cmp_c -> adp_c + cdp_c	1		1	(CV_3047)	(CV_3047)	Pyrimidine metabolism	0	0	1000	0	1.5		R00512		R00512	''			CYTK1				(x(370))	As per Metacyc should be forward only
rxn01444_c	rxn01444	rxn01444		ATP deoxyguanosine 5-phosphotransferase	atp_c + dgsn_c -> adp_c + dgmp_c	1		1	(CV_1634) and (CV_1634)	(CV_1634) and (CV_1634)	Purine metabolism	0	0	1000	0	1.3		R01967		R01967	''			DGNSKm				(x(149)) & (x(149))	Reversibility changed based on iAF1260
rxn00515_c	rxn00515	rxn00515		ATP nucleoside-diphosphate phosphatransferase	atp_c + idp_c -> adp_c + itp_c	1		1	(CV_3542)	(CV_3542)	Purine metabolism	0	0	1000	0	1.5		R00722		R00722	''			NDPK9				(x(457))	Reversibility changed based on iAF1260
rxn02011_c	rxn02011	rxn02011		UDP-N-acetylmuramoyl-L-alanyl-D-glutamate meso-2 6-	atp_c + 26dap__M_c + uamag_c -> h_c + adp_c + pi_c + ugmd_c	1		1	(CV_4348)	(CV_4348)	Lysine Biosynthesis	0	0	1000	0	1.4		R02788		R02788	''			UAAGDS				(x(651))
rxn02186_c	rxn02186	rxn02186		2 3-Dihydroxy-3-methylbutanoate NADP oxidoreductase isomerizing	h_c + nadph_c + alac__S_c -> nadp_c + 23dhmb_c	1		1	(CV_0588)	(CV_0588)	Pantothenate and CoA biosynthesis	0	0	1000	0	2.2		R03051,R04439		R03051,R04439	''			None				(x(693))	As per Metacyc should be forward only
rxn10227_c	rxn10227	rxn10227		anteisoheptadecanoyl-CDPdiacylglycerol-serine O-phosphatidyltransferase	ser__L_c + cpd15684_c -> h_c + cmp_c + cpd15690_c	1		1	(CV_1111)	(CV_1111)	Glycerolipid and Glycerophospholipid metabolism	0	0	1000	0	1.3		None		None	''							(x(29))
rxn09113_c	rxn09113	rxn09113		Phosphatidylglycerol synthase n-C18 0	glyc3p_c + cdpdodecg_c -> cmp_c + pgp180_c	1		1	(CV_1306)	(CV_1306)	Glycerolipid and Glycerophospholipid metabolism	0	0	1000	0	1.3		None		None	''							(x(68))
rxn03536_c	rxn03536	rxn03536		Adenosyl cobinamide kinase	atp_c + adocbi_c -> h_c + adp_c + adocbip_c	1		1	(CV_0495)	(CV_0495)	Porphyrin and chlorophyll metabolism	0	0	1000	0	1.3		R05221		R05221	''			ADOCBIK				(x(667))	Reversibility changed based on iAF1260
rxn12846_c	rxn12846	rxn12846		Gly-Phe aminopeptidase	h2o_c + gly_phe__L_c <=> gly_c + phe__L_c	1		1	(CV_2694) or (CV_4047) or (CV_1176) or (CV_4047) or (CV_2397) or (CV_2334) or (CV_2914)	(CV_2694) or (CV_4047) or (CV_1176) or (CV_4047) or (CV_2397) or (CV_2334) or (CV_2914)	Recycling of Peptidoglycan Amino Acids	1	-1000	1000	0	1.4		None		None	''							(x(319)) | (x(579)) | (x(47)) | (x(579)) | (x(289)) | (x(276)) | (x(353))
rxn01218_c	rxn01218	rxn01218		2-Deoxycytidine 5-monophosphate phosphohydrolase	h2o_c + dcmp_c -> h_c + pi_c + dcyt_c	1		1	(CV_3083) or (CV_1743)	(CV_3083) or (CV_1743)	Pyrimidine metabolism	0	0	1000	0	1.5		R01664		R01664	''			NTD3				(x(381)) | (x(172))
rxn05161_c	rxn05161	rxn05161		L-Leucine-ABC transport	atp_c + h2o_c + leu__L_e -> h_c + adp_c + pi_c + leu__L_c	1		1	(CV_0405) or (CV_2481) or (CV_1503)	(CV_0405) or (CV_2481) or (CV_1503)	Transport via ABC	0	0	1000	0	1.3		None		None	''			LEUabc				(x(581)) | (x(300)) | (x(107))
rxn05239_c	rxn05239	rxn05239		adenosine 3 5-bisphosphate sulfite oxidized-thioredoxin oxidoreductase	trdrd_c + paps_c -> trdox_c + so3_c + pap_c	1		1	(CV_3574) and (CV_3574)	(CV_3574) and (CV_3574)	Sulfur metabolism	0	0	1000	0	1.5		R02021		R02021	''			PAPSR				(x(467)) & (x(467))
rxn08547_c	rxn08547	rxn08547		glycerol-3-phosphate acyltransferase C14 0	glyc3p_c + myrsACP_c -> ACP_c + 1tdecg3p_c	1		1	(CV_3688) and (CV_3417)	(CV_3688) and (CV_3417)	Glycerolipid and Glycerophospholipid metabolism	0	0	1000	0	1.5		None		None	''							(x(498)) & (x(436))
rxn05201_c	rxn05201	rxn05201		Hypoxanthine ion-coupled transport	h_e + hxan_e <=> h_c + hxan_c	1		1	(CV_3771)	(CV_3771)	Transport ion coupled	1	-1000	1000	0	1.3		None		None	''							(x(527))
rxn10233_c	rxn10233	rxn10233		anteisoheptadecanoyl-phosphatidylserine decarboxylase	2 h_c + cpd15690_c -> co2_c + cpd15696_c	1		1	(CV_0591)	(CV_0591)	Glycerolipid and Glycerophospholipid metabolism	0	0	1000	0	1.3		None		None	''							(x(694))
rxn08976_c	rxn08976	rxn08976		NADH dehydrogenase demethylmenaquinone-8 & 0 protons	h_c + nadh_c + 2dmmq8_c -> nad_c + 2dmmql8_c	1		1	(CV_0992) or (CV_3221)	(CV_0992) or (CV_3221)	Oxidative phosphorylation	0	0	1000	0	1.1		R00281		R00281	''			None				(x(785)) | (x(402))	Only in forward direction according to Biocyc
rxn02789_c	rxn02789	rxn02789		2-Isopropylmalate hydro-lyase	3c3hmp_c -> h2o_c + 2ippm_c	1		1	((CV_2782) or (CV_2168)) or ((CV_2784) or (CV_2169))	((CV_2782) or (CV_2168)) or ((CV_2784) or (CV_2169))	Valine, Leucine and Isoleucine Biosynthesis	0	0	1000	0	2.2		R03968		R03968	''			IMDHT				(x(339)) | (x(238)) | (x(340)) | (x(239))
rxn05383_c	rxn05383	rxn05383		3-methylbutanoyl-CoA acyl-carrier-protein transferase	ACP_c + ivcoa_c <=> coa_c + cpd11520_c	1		1	(CV_3415)	(CV_3415)	Fatty acid biosynthesis	1	-1000	1000	0	1.1		None		None	''							(x(434))
rxn01331_c	rxn01331	rxn01331		D-erythrose 4-phosphate NAD oxidoreductase	h2o_c + nad_c + e4p_c -> 2 h_c + nadh_c + 4per_c	1		1	(CV_0560) or (CV_0190)	(CV_0560) or (CV_0190)	Vitamin B6 metabolism	0	0	1000	0	1.3		R01825		R01825	''			E4PD				(x(687)) | (x(189))
rxn10042_c	rxn10042	rxn10042		ATP synthase four protons for one ATP	adp_c + pi_c + 4 h_e <=> 3 h_c + atp_c + h2o_c	1		1	(CV_0666) and (CV_0670) and (CV_0671) and (CV_0667) and (CV_0668) and (CV_0672) and (CV_0669) and (CV_0673)	(CV_0666) and (CV_0670) and (CV_0671) and (CV_0667) and (CV_0668) and (CV_0672) and (CV_0669) and (CV_0673)	Oxidative phosphorylation	1	-1000	1000	0	2.2		None		None	''			ATPS4r	ATPS4r			(x(711)) & (x(715)) & (x(716)) & (x(712)) & (x(713)) & (x(717)) & (x(714)) & (x(718))	Reversibility changed based on iAF1260
rxn00800_c	rxn00800	rxn00800		N6-1 2-DicarboxyethylAMP AMP-lyase	dcamp_c -> fum_c + amp_c	1		1	(CV_3834)	(CV_3834)	Purine metabolism	0	0	1000	0	1.5		R01083		R01083	''			ADSL1r				(x(540))
rxn01343_c	rxn01343	rxn01343		ATP Sedoheptulose 7-phosphate 1-phosphotransferase	atp_c + s7p_c -> adp_c + s17bp_c	1		1	(CV_1745)	(CV_1745)	Glycolysis/Gluconeogenesis	0	0	1000	0	1.1		R01843		R01843	''			PFK_3				(x(173))	Reversibility changed based on iAF1260
rxn01520_c	rxn01520	rxn01520		5 10-Methylenetetrahydrofolate dUMP C-methyltransferase	dump_c + mlthf_c -> dtmp_c + dhf_c	1		1	(CV_1027)	(CV_1027)	One carbon pool by folate	0	0	1000	0	1.5		R02101		R02101	''			TMDS				(x(6))
rxn00189_c	rxn00189	rxn00189		L-Glutamine amidohydrolase	h2o_c + gln__L_c -> glu__L_c + nh4_c	1		1	(CV_4158)	(CV_4158)	D-Glutamine and D-glutamate metabolism	0	0	1000	0	1.3		R00256		R00256	''			GLUN	GLUN			(x(593))
rxn05234_c	rxn05234	rxn05234		Ribonucleotide reductase GTP	trdrd_c + gtp_c -> h2o_c + trdox_c + dgtp_c	1		1	(CV_2412)	(CV_2412)	Purine metabolism	0	0	1000	0	1.3		R02020		R02020	''			RNTR2				(x(291))
rxn00322_c	rxn00322	rxn00322		L-Lysine carboxy-lyase	h_c + lys__L_c -> co2_c + 15dap_c	1		1	(CV_1992) or (CV_4040)	(CV_1992) or (CV_4040)	Lysine degradation	0	0	1000	0	1.3		R00462		R00462	''			LYSDC				(x(212)) | (x(577))
rxn05441_c	rxn05441	rxn05441		9-methyl-trans-dec-2-enoyl-ACP NAD oxidoreductase A-specific	h_c + nadh_c + cpd11531_c -> nad_c + cpd11532_c	1		1	(CV_1583) or (CV_3743)	(CV_1583) or (CV_3743)	Fatty acid biosynthesis	0	0	1000	0	1.1		None		None	''							(x(134)) | (x(516))
rxn00179_c	rxn00179	rxn00179		ATP L-glutamate 5-phosphotransferase	h_c + atp_c + glu__L_c -> adp_c + glu5p_c	1		1	(CV_4212)	(CV_4212)	Urea cycle and metabolism of amino groups	0	0	1000	0	1.3		R00239		R00239	''			GLU5K				(x(627))	Reversibility changed based on iAF1260
rxn05307_c	rxn05307	rxn05307		SERt2	h_e + ser__L_e <=> h_c + ser__L_c	1		1	(CV_1138) or (CV_1409)	(CV_1138) or (CV_1409)	Transport via Proton Symport	1	-1000	1000	0	1		None		None	''			SERt2r				(x(40)) | (x(86))
rxn03991_c	rxn03991	rxn03991		nitric oxide NADPH2 oxygen oxidoreductase	nadph_c + 2 o2_c + 2 no_c -> h_c + nadp_c + 2 no3_c	1		1	(CV_3488)	(CV_3488)	Flavohaemoglobin	0	0	1000	0	1.4		R05725		R05725	''			NODOy				(x(451))	As per Metacyc should be forward only
rxn01465_c	rxn01465	rxn01465		S-Dihydroorotate amidohydrolase	h_c + cbasp_c -> h2o_c + dhor__S_c	1		1	(CV_4330)	(CV_4330)	Pyrimidine metabolism	0	0	1000	0	1.5		R01993		R01993	''			DHORTS				(x(644))
rxn05654_c	rxn05654	rxn05654		succinate transporter in/out via proton symport	h_e + succ_e -> h_c + succ_c	1		1	(CV_1370) or (CV_0919 and CV_0918 and CV_0917)	(CV_1370) or (CV_0919 and CV_0918 and CV_0917)	Transport via Proton Symport	0	0	1000	0	1.3		None		None	''			SUCCt3	SUCCt3			(x(80)) | (x(750) & x(836) & x(837))	Only forward as per literature
rxn05364_c	rxn05364	rxn05364		6-methyl-3-oxo-octanoyl-ACP NADP oxidoreductase	h_c + nadph_c + cpd11500_c -> nadp_c + cpd11501_c	1		1	(CV_3414) or (CV_3947) or (CV_2707) or (CV_2258) or (CV_1046) or (CV_3576) or (CV_1546) or (CV_3406)	(CV_3414) or (CV_3947) or (CV_2707) or (CV_2258) or (CV_1046) or (CV_3576) or (CV_1546) or (CV_3406)	Fatty acid biosynthesis	0	0	1000	0	1.1		None		None	''							(x(433)) | (x(556)) | (x(320)) | (x(260)) | (x(9)) | (x(468)) | (x(117)) | (x(428))
rxn00863_c	rxn00863	rxn00863		L-Histidinal NAD oxidoreductase	h2o_c + nad_c + cpd01324_c -> 2 h_c + nadh_c + his__L_c	1		1	(CV_0611)	(CV_0611)	Histidine metabolism	0	0	1000	0	1.5		R01163		R01163	''			None				(x(700))
rxn00209_c	rxn00209	rxn00209		Pyridoxine 5-phosphate oxygen oxidoreductase deaminating	o2_c + pdx5p_c -> h2o2_c + pydx5p_c	1		1	(CV_0059)	(CV_0059)	Vitamin B6 metabolism	0	0	1000	0	1.3		R00278		R00278	''			PDX5POi				(x(680))
rxn03150_c	rxn03150	rxn03150		alpha-ribazole 5-phosphate phosphatase	h2o_c + 5prdmbz_c -> h_c + pi_c + rdmbzi_c	1		1	(CV_0492)	(CV_0492)	Riboflavin metabolism	0	0	1000	0	1.1		R04594		R04594	''			RZ5PP				(x(664))
rxn01800_c	rxn01800	rxn01800		Deoxycytidine aminohydrolase	h_c + h2o_c + dcyt_c -> nh4_c + duri_c	1		1	(CV_2570)	(CV_2570)	Pyrimidine metabolism	0	0	1000	0	1.3		R02485		R02485	''			None				(x(312))
rxn09449_c	rxn09449	rxn09449		fatty-acid--CoA ligase octadecanoate	h_c + atp_c + coa_c + ocdca_c -> ppi_c + amp_c + stcoa_c	1		1	(CV_0898) or (CV_1780) or (CV_0093) or (CV_1486) or (CV_2802) or (CV_2803) or (CV_4051) or (CV_1459)	(CV_0898) or (CV_1780) or (CV_0093) or (CV_1486) or (CV_2802) or (CV_2803) or (CV_4051) or (CV_1459)	Fatty acid metabolism	0	0	1000	0	1.3		R00390		R00390	''			None				(x(747)) | (x(182)) | (x(742)) | (x(101)) | (x(342)) | (x(343)) | (x(580)) | (x(96))
rxn02167_c	rxn02167	rxn02167		S-3-Hydroxybutanoyl-CoA hydro-lyase	3hbcoa_c <=> h2o_c + b2coa_c	1		1	(CV_2720) or (CV_1553) or (CV_2485)	(CV_2720) or (CV_1553) or (CV_2485)	Lysine degradation	1	-1000	1000	0	1.1		R03026		R03026	''			ECOAH1				(x(323)) | (x(118)) | (x(302))
rxn10168_c	rxn10168	rxn10168		Potassium ABC transporter	atp_c + h2o_c + k_e -> h_c + adp_c + pi_c + k_c	1		1	(CV_1599) or (CV_1597) or (CV_1598)	(CV_1599) or (CV_1597) or (CV_1598)	Transport via ABC	0	0	1000	0	1.3		None		None	''							(x(141)) | (x(139)) | (x(140))
rxn01504_c	rxn01504	rxn01504		S-3-Hydroxy-3-methylglutaryl-CoA hydro-lyase	hmgcoa_c <=> h2o_c + 3mgcoa_c	1		1	(CV_1330) or (CV_1763)	(CV_1330) or (CV_1763)	Valine, Leucine and Isoleucine degradation	1	-1000	1000	0	1.3		R02085		R02085	''			MGC				(x(71)) | (x(179))
rxn03436_c	rxn03436	rxn03436		S-2-Aceto-2-hydroxybutanoate NADP oxidoreductase isomerizing	2ahbut_c -> 3hmop_c	1		1	(CV_0588)	(CV_0588)	Valine, Leucine and Isoleucine Biosynthesis	0	0	1000	0	2.2		R05069		R05069	''			KARI				(x(693))
rxn08756_c	rxn08756	rxn08756		1-hydroxy-2-methyl-2-E-butenyl 4-diphosphate reductase ipdp	h_c + nadh_c + h2mb4p_c -> ipdp_c + h2o_c + nad_c	1		1	(CV_3567)	(CV_3567)	Isoprenoid Biosynthesis	0	0	1000	0	1.5		R08209		R08209	''			IPDPS				(x(463))
rxn00423_c	rxn00423	rxn00423		serine O-acetyltransferase	accoa_c + ser__L_c -> coa_c + acser_c	1		1	(CV_0044)	(CV_0044)	Cysteine and Methionine metabolism	0	0	1000	0	1.1		R00586		R00586	''			SERAT				(x(562))
rxn00615_c	rxn00615	rxn00615		ATP glycerol 3-phosphotransferase	atp_c + glyc_c -> adp_c + glyc3p_c	1		1	(CV_0251)	(CV_0251)	Glycerolipid and Glycerophospholipid metabolism	0	0	1000	0	1.5		R00847		R00847	''			GLYK				(x(295))	Reversibility changed based on iAF1260
rxn03248_c	rxn03248	rxn03248		Hexanoyl-CoA acetyl-CoA C-acyltransferase	accoa_c + hxcoa_c <=> coa_c + 3oocoa_c	1		1	(CV_2719) or (CV_2790)	(CV_2719) or (CV_2790)	Fatty acid metabolism	1	-1000	1000	0	2.2		R04747		R04747	''			KAT3				(x(322)) | (x(341))
rxn08307_c	rxn08307	rxn08307		CDP-diacylglycerol synthetase n-C14 0	ctp_c + pa140_c -> ppi_c + cdpdtdecg_c	1		1	(CV_2201)	(CV_2201)	Glycerolipid and Glycerophospholipid metabolism	0	0	1000	0	1.3		None		None	''							(x(248))
rxn08205_c	rxn08205	rxn08205		CDP-Diacylglycerol pyrophostatase n-C18 1	h2o_c + cdpdodec11eg_c -> cmp_c + pa181_c	1		1	(CV_4315)	(CV_4315)	Glycerolipid and Glycerophospholipid metabolism	0	0	1000	0	1.3		None		None	''							(x(643))
rxn10153_c	rxn10153	rxn10153		Malate transport via proton symport 2 H	2 h_e + mal__L_e -> 2 h_c + mal__L_c	1		1	(CV_3707)	(CV_3707)	Transport via Proton Symport	0	0	1000	0	1.3		None		None	''			MALt2_2	MALt2_2			(x(510))	Reversibility changed based on iAF1260
rxn02201_c	rxn02201	rxn02201		2-Amino-4-hydroxy-6-hydroxymethyl-7 8-dihydropteridine-	4abz_c + 6hmhptpp_c -> ppi_c + dhpt_c	1		1	(CV_3796)	(CV_3796)	Folate biosynthesis	0	0	1000	0	1.4		R03067		R03067	''			DHPS2				(x(536))
rxn05555_c	rxn05555	rxn05555		iron II transport via ABC system	atp_c + h2o_c + fe2_e -> h_c + adp_c + pi_c + fe2_c	1		1	(CV_3553)	(CV_3553)	Transport via ABC	0	0	1000	0	1.3		None		None	''			FE2abc				(x(460))
rxn05402_c	rxn05402	rxn05402		13-methyl-3-hydroxy-tetra-decanoyl-ACP hydro-lyase	cpd11538_c -> h2o_c + cpd11539_c	1		1	(CV_3950) or (CV_2207)	(CV_3950) or (CV_2207)	Fatty acid biosynthesis	0	0	1000	0	1.5		None		None	''							(x(559)) | (x(251))
rxn00742_c	rxn00742	rxn00742		L-Cystathionine Lysteine-lyase deaminating	h2o_c + cyst__L_c -> cys__L_c + nh4_c + 2obut_c	1		1	(CV_3394)	(CV_3394)	Glycine, Serine and Threonine metabolism	0	0	1000	0	2.2		R01001		R01001	''			None				(x(426))
rxn02159_c	rxn02159	rxn02159		L-Histidinol NAD oxidoreductase	nad_c + histd_c -> h_c + nadh_c + cpd01324_c	1		1	(CV_0611)	(CV_0611)	Histidine metabolism	0	0	1000	0	1.5		R03012		R03012	''			None				(x(700))
rxn00056_c	rxn00056	rxn00056		FeII oxygen oxidoreductase	4 h_c + o2_c + 4 fe2_c <=> 2 h2o_c + 4 fe3_c	1		1	(CV_4253)	(CV_4253)	Porphyrin and chlorophyll metabolism	1	-1000	1000	0	1.1		R00078		R00078	''			None				(x(634))
rxn00727_c	rxn00727	rxn00727		Chorismate pyruvate-lyase amino-accepting	chor_c + gln__L_c -> h_c + glu__L_c + pyr_c + anth_c	1		1	(CV_2179) and (CV_2175)	(CV_2179) and (CV_2175)	Phenylalanine, Tyrosine and Tryptophan biosynthesis	0	0	1000	0	1.5		R00986		R00986	''			ANS	ANS			(x(243)) & (x(242))	As per Metacyc should be forward only					As per Metacyc and Lit evidence these two genes only for ANS
rxn03891_c	rxn03891	rxn03891		trans-hexaprenyltranstransferase	ipdp_c + hexdp_c -> hepdp_c + ppi_c	1		1	(CV_0847) or (CV_2691) or (CV_3954)	(CV_0847) or (CV_2691) or (CV_3954)	Biosynthesis of steroids	0	0	1000	0	1.1		R05612		R05612	''			HEXTT				(x(738)) | (x(317)) | (x(560))
rxn00212_c	rxn00212	rxn00212		UDPglucose pyrophosphohydrolase	h2o_c + udpg_c -> ump_c + g1p_c	1		1	(CV_1743)	(CV_1743)	Starch and sucrose metabolism	0	0	1000	0	1.5		R00287		R00287	''			UDPGP				(x(172))
rxn06076_c	rxn06076	rxn06076		2-Deoxycytidine diphosphate oxidized-thioredoxin 2-oxidoreductase	trdrd_c + cdp_c -> dcdp_c + h2o_c + trdox_c	1		1	(CV_2284) or (CV_2287)	(CV_2284) or (CV_2287)	Pyrimidine metabolism	0	0	1000	0	1.5		R02024		R02024	''			RNDR3				(x(261)) | (x(262))
rxn04385_c	rxn04385	rxn04385		L-threonine-O-3-phosphate carboxy-lyase	h_c + thrp_c -> co2_c + applp_c	1		1	(CV_1574)	(CV_1574)	Porphyrin and chlorophyll metabolism	0	0	1000	0	1.3		R06530		R06530	''			THRPD				(x(130))
rxn05348_c	rxn05348	rxn05348		Decanoyl-acyl-carrier protein malonyl-acyl-carrier-protein	h_c + malACP_c + dcaACP_c -> co2_c + ACP_c + 3oddecACP_c	1		1	(CV_3412 or CV_3948 or CV_1541 or CV_3949) and (CV_3416 or CV_1096 or CV_0805)	(CV_3412 or CV_3948 or CV_1541 or CV_3949) and (CV_3416 or CV_1096 or CV_0805)	Fatty acid biosynthesis	0	0	1000	0	1.3		R04963		R04963	''			3OAS120				(x(432) | x(557) | x(115) | x(558)) & (x(435) | x(24) | x(730))
rxn02914_c	rxn02914	rxn02914		3-Phosphoserine 2-oxoglutarate aminotransferase	akg_c + pser__L_c <=> glu__L_c + 3php_c	1		1	(CV_2301)	(CV_2301)	Glycine, Serine and Threonine metabolism	1	-1000	1000	0	2.2		R04173		R04173	''			PSERT	PSERT			(x(266))	Only in backward direction according to Biocyc					irreversible in iDB149
rxn01300_c	rxn01300	rxn01300		ATP L-homoserine O-phosphotransferase	atp_c + hom__L_c -> adp_c + phom_c	1		1	(CV_0776)	(CV_0776)	Glycine, Serine and Threonine metabolism	0	0	1000	0	1.5		R01771		R01771	''			HSK				(x(726))	Reversibility changed based on iAF1260
rxn00175_c	rxn00175	rxn00175		Acetate CoA ligase AMP-forming	h_c + atp_c + ac_c + coa_c -> ppi_c + accoa_c + amp_c	1		1	(CV_3282)	(CV_3282)	Reductive carboxylate cycle (CO2 fixation)	0	0	1000	0	1.5		R00235		R00235	''			ACS				(x(407))	Reversibility changed based on iAF1260
rxn01313_c	rxn01313	rxn01313		NADH 6 7-dihydropteridine oxidoreductase	h_c + nadh_c + dhbpt_c -> nad_c + thbpt_c	1		1	(CV_2244)	(CV_2244)	Folate biosynthesis	0	0	1000	0	1.3		R01793		R01793	''			DHPR				(x(256))	As per Metacyc should be forward only
rxn00715_c	rxn00715	rxn00715		ITP uridine 5-phosphotransferase	uri_c + itp_c -> ump_c + idp_c	1		1	(CV_1085)	(CV_1085)	Pyrimidine metabolism	0	0	1000	0	1.5		R00970		R00970	''			URIK3				(x(23))	As per Metacyc should be forward only
rxn01647_c	rxn01647	rxn01647		Nicotinate D-ribonucleoside orthophosphate ribosyltransferase	pi_c + nicrns_c <=> nac_c + r1p_c	1		1	(CV_4097) or (CV_3698)	(CV_4097) or (CV_3698)	Nicotinate and nicotinamide metabolism	1	-1000	1000	0	1.5		R02295		R02295	''			NP1				(x(585)) | (x(505))
rxn12642_c	rxn12642	rxn12642		aminopeptidase	h2o_c + ala_L_his__L_c <=> ala__L_c + his__L_c	1		1	(CV_2694) or (CV_4047) or (CV_1176) or (CV_4047) or (CV_2397 or CV_2334) or (CV_2914)	(CV_2694) or (CV_4047) or (CV_1176) or (CV_4047) or (CV_2397 or CV_2334) or (CV_2914)	Recycling of Peptidoglycan Amino Acids	1	-1000	1000	0	1.1		None		None	''							(x(319)) | (x(579)) | (x(47)) | (x(579)) | (x(289) | x(276)) | (x(353))
rxn05198_c	rxn05198	rxn05198		Cytidine ion-coupled transport	h_e + cytd_e <=> h_c + cytd_c	1		1	(CV_2040) or (CV_1931)	(CV_2040) or (CV_1931)	Transport ion coupled	1	-1000	1000	0	1.3		None		None	''							(x(222)) | (x(203))
rxn00501_c	rxn00501	rxn00501		3-Oxopropanoate NAD oxidoreductase decarboxylating	coa_c + nad_c + msa_c <=> co2_c + accoa_c + nadh_c	1		1	(CV_2085) or (CV_1437)	(CV_2085) or (CV_1437)	Propanoate metabolism	1	-1000	1000	0	1.5		R00705		R00705	''			MMSAD3				(x(231)) | (x(94))
rxn07588_c	rxn07588	rxn07588		rxn07588	amet_c + codhpre6_c <=> h_c + ahcys_c + codscl7_c	1		1	(CV_1568)	(CV_1568)	Porphyrin and chlorophyll metabolism	1	-1000	1000	0	1.1		R07774		R07774	''			None				(x(128))
rxn09688_c	rxn09688	rxn09688		deoxyguanosine transport in via proton symport	h_e + dgsn_e <=> h_c + dgsn_c	1		1	(CV_2040) or (CV_1931)	(CV_2040) or (CV_1931)	Transport via Proton Symport	1	-1000	1000	0	1.3		None		None	''							(x(222)) | (x(203))
rxn05369_c	rxn05369	rxn05369		8-methyl-3-hydroxy-decanoyl-ACP hydro-lyase	cpd11505_c -> h2o_c + cpd11506_c	1		1	(CV_3950) or (CV_2207)	(CV_3950) or (CV_2207)	Fatty acid biosynthesis	0	0	1000	0	1.5		None		None	''							(x(559)) | (x(251))
rxn02504_c	rxn02504	rxn02504		2-Amino-4-hydroxy-6-D-erythro-1 2 3-trihydroxypropyl-7 8-	dhnpt_c -> 6hmhpt_c + gcald_c	1		1	(CV_3689)	(CV_3689)	Folate biosynthesis	0	0	1000	0	1.3		R03504		R03504	''			DHNPA2r				(x(499))
rxn01672_c	rxn01672	rxn01672		dCTP aminohydrolase	h_c + dctp_c + h2o_c -> dutp_c + nh4_c	1		1	(CV_3554)	(CV_3554)	Pyrimidine metabolism	0	0	1000	0	1.5		R02325		R02325	''			None				(x(461))
rxn10473_c	rxn10473	rxn10473		chlorideion transport out via diffusion	cl_e -> cl_c	1		1	(peg.373) or (CV_3619) or (CV_2429)	(peg.373) or (CV_3619) or (CV_2429)	Transport via diffusion	0	0	1000	0	1.3		None		None	''							(x(507)) | (x(478)) | (x(293))
rxn08975_c	rxn08975	rxn08975		NADH dehydrogenase ubiquinone-8	h_c + nadh_c + q8_c -> nad_c + q8h2_c	1		1	(CV_0992) or (CV_3221)	(CV_0992) or (CV_3221)	Oxidative phosphorylation	0	0	1000	0	1		R02163		R02163	''			None				(x(785)) | (x(402))
rxn05534_c	rxn05534	rxn05534		Dipeptide transport via ABC system gly-glu	atp_c + h2o_c + gly_glu__L_e -> h_c + adp_c + pi_c + gly_glu__L_c	1		1	(CV_3936) or (CV_1097) or (CV_3426) or (CV_2688)	(CV_3936) or (CV_1097) or (CV_3426) or (CV_2688)	Transport via ABC	0	0	1000	0	1.3		None		None	''							(x(554)) | (x(25)) | (x(439)) | (x(316))
rxn03918_c	rxn03918	rxn03918		D-glycero-D-manno-heptose 7-phosphate kinase	atp_c + gmhep7p_c -> adp_c + gmhep17bp_c	1		1	(CV_3040)	(CV_3040)	Lipopolysaccharide biosynthesis	0	0	1000	0	1.3		R05646		R05646	''			None				(x(368))
rxn08556_c	rxn08556	rxn08556		glycerol-3-phosphate dehydrogenase ubiquinone-8	glyc3p_c + q8_c -> q8h2_c + dhap_c	1		1	(CV_0254)	(CV_0254)	Oxidative phosphorylation	0	0	1000	0	1.3		R08657		R08657	''			None				(x(303))
rxn00912_c	rxn00912	rxn00912		5 10-Methylenetetrahydrofolate 3-methyl-2-oxobutanoate	h2o_c + 3mob_c + mlthf_c -> thf_c + 2dhp_c	1		1	(CV_1635)	(CV_1635)	Pantothenate and CoA biosynthesis	0	0	1000	0	1.5		R01226		R01226	''			MOHMT				(x(150))
rxn05618_c	rxn05618	rxn05618		manganese transport in via proton symport	h_e + mn2_e -> h_c + mn2_c	1		1	(CV_3478) or (CV_0576)	(CV_3478) or (CV_0576)	Transport via Proton Symport	0	0	1000	0	1		None		None	''							(x(450)) | (x(689))
rxn05435_c	rxn05435	rxn05435		8-methyl-trans-dec-2-enoyl-ACP NAD oxidoreductase A-specific	h_c + nadh_c + cpd11506_c -> nad_c + cpd11507_c	1		1	(CV_1583) or (CV_3743)	(CV_1583) or (CV_3743)	Fatty acid biosynthesis	0	0	1000	0	1.1		None		None	''							(x(134)) | (x(516))
rxn01358_c	rxn01358	rxn01358		inosine orthophosphate ribosyltransferase	h_c + pi_c + ins_c <=> r1p_c + hxan_c	1		1	(CV_4097) or (CV_3698)	(CV_4097) or (CV_3698)	Purine metabolism	1	-1000	1000	0	1.5		R01863		R01863	''			PUNP5				(x(585)) | (x(505))
rxn00692_c	rxn00692	rxn00692		5 10-Methylenetetrahydrofolate glycine hydroxymethyltransferase	gly_c + h2o_c + mlthf_c <=> ser__L_c + thf_c	1		1	(CV_1286)	(CV_1286)	Glycine, Serine and Threonine metabolism	1	-1000	1000	0	2.2		R00945		R00945	''			GHMT				(x(65))
rxn05559_c	rxn05559	rxn05559		formate transport in via proton symport	h_e + for_e <=> h_c + for_c	1		1	(CV_1411)	(CV_1411)	Transport via Proton Symport	1	-1000	1000	0	1.5		None		None	''			FORt2	FORt2			(x(87))
rxn03068_c	rxn03068	rxn03068		R-2 3-Dihydroxy-3-methylbutanoate NADP oxidoreductase	nadp_c + 23dhmb_c -> h_c + nadph_c + 3hmoa_c	1		1	(CV_0588)	(CV_0588)	Valine, Leucine and Isoleucine Biosynthesis	0	0	1000	0	2.2		R04440		R04440	''			KARI_23dhmb				(x(693))	As per Metacyc should be forward only
rxn00566_c	rxn00566	rxn00566		L-Cysteine L-homocysteine-lyase deaminating	h2o_c + cys__L_c -> h2s_c + pyr_c + nh4_c	1		1	(CV_3394)	(CV_3394)	Cysteine and Methionine metabolism	0	0	1000	0	1.5		R00782		R00782	''			None				(x(426))
rxn00992_c	rxn00992	rxn00992		R-3-Hydroxybutanoate NAD oxidoreductase	nad_c + bhb_c <=> h_c + nadh_c + acac_c	1		1	(CV_0695)	(CV_0695)	Butanoate metabolism	1	-1000	1000	0	1.2		R01361		R01361	''			BDH				(x(721))
rxn05361_c	rxn05361	rxn05361		4-methyl-3-hydroxy-hexanoyl-ACP hydro-lyase	cpd11497_c -> h2o_c + cpd11498_c	1		1	(CV_3950) or (CV_2207)	(CV_3950) or (CV_2207)	Fatty acid biosynthesis	0	0	1000	0	1.5		None		None	''							(x(559)) | (x(251))
rxn08971_c	rxn08971	rxn08971		NADH dehydrogenase menaquinone-8 & 0 protons	h_c + nadh_c + mqn8_c -> nad_c + mql8_c	1		1	(CV_0992) or (CV_3221)	(CV_0992) or (CV_3221)	Oxidative phosphorylation	0	0	1000	0	1.5		None		None	''							(x(785)) | (x(402))
rxn01303_c	rxn01303	rxn01303		Acetyl-CoA L-homoserine O-acetyltransferase	accoa_c + hom__L_c -> coa_c + achms_c	1		1	(CV_0786)	(CV_0786)	Methionine metabolism	0	0	1000	0	1		R01776		R01776	''			HSERTA				(x(727))
rxn12634_c	rxn12634	rxn12634		aminopeptidase	h2o_c + gly_glu__L_c <=> gly_c + glu__L_c	1		1	(CV_2694) or (CV_4047) or (CV_1176) or (CV_4047) or (CV_2397 or CV_2334) or (CV_2914)	(CV_2694) or (CV_4047) or (CV_1176) or (CV_4047) or (CV_2397 or CV_2334) or (CV_2914)	Recycling of Peptidoglycan Amino Acids	1	-1000	1000	0	1.1		None		None	''							(x(319)) | (x(579)) | (x(47)) | (x(579)) | (x(289) | x(276)) | (x(353))
rxn10232_c	rxn10232	rxn10232		isoheptadecanoyl-phosphatidylserine decarboxylase	2 h_c + cpd15689_c -> co2_c + cpd15695_c	1		1	(CV_0591)	(CV_0591)	Glycerolipid and Glycerophospholipid metabolism	0	0	1000	0	1.3		None		None	''							(x(694))
rxn00300_c	rxn00300	rxn00300		GTP 7 8-8 9-dihydrolase pyrophosphate-forming	3 h2o_c + gtp_c -> ppi_c + h_c + for_c + 25drapp_c	1		1	(CV_2005) or (CV_2389)	(CV_2005) or (CV_2389)	Riboflavin metabolism	0	0	1000	0	1.5		R00425		R00425	''			GTPCII2				(x(215)) | (x(286))
rxn02288_c	rxn02288	rxn02288		Uroporphyrinogen-III carboxy-lyase	4 h_c + uppg3_c -> 4 co2_c + cpppg3_c	1		1	(CV_1122)	(CV_1122)	Porphyrin and chlorophyll metabolism	0	0	1000	0	1.5		R03197		R03197	''			UPPDC1				(x(33))
rxn00907_c	rxn00907	rxn00907		5 10-methylenetetrahydrofolate NADP oxidoreductase	nadp_c + mlthf_c <=> nadph_c + methf_c	1		1	(CV_1925) and (CV_1925)	(CV_1925) and (CV_1925)	Folate biosynthesis	1	-1000	1000	0	1.5		R01220		R01220	''			MTHFD				(x(200)) & (x(200))
rxn01269_c	rxn01269	rxn01269		Prephenate NADP oxidoreductasedecarboxylating	nadp_c + pphn_c -> co2_c + nadph_c + 2h34hppr_c	1		1	(CV_3407)	(CV_3407)	Phenylalanine, Tyrosine and Tryptophan biosynthesis	0	0	1000	0	1.1		R01730		R01730	''			None				(x(429))
rxn04048_c	rxn04048	rxn04048		cobalt-precorrin-4 methyltransferase	amet_c + copre4_c <=> copre5_c + ahcys_c	1		1	(CV_1564)	(CV_1564)	Porphyrin and chlorophyll metabolism	1	-1000	1000	0	1.3		R05810		R05810	''			CODSCL4MT				(x(124))
rxn00278_c	rxn00278	rxn00278		L-Alanine NAD oxidoreductase deaminating	h2o_c + nad_c + ala__L_c -> h_c + nadh_c + pyr_c + nh4_c	1		1	(CV_2022)	(CV_2022)	Reductive carboxylate cycle (CO2 fixation)	0	0	1000	0	1.5		R00396		R00396	''			None				(x(218))	As per Metacyc should be forward only
rxn06673_c	rxn06673	rxn06673		Acetyl-CoA carbon-dioxide ligase ADP-forming	accoa_c + cbtnCCP_c -> malcoa_c + btnCCP_c	1		1	(CV_3190) and (CV_2760)	(CV_3190) and (CV_2760)	Fatty acid biosynthesis	0	0	1000	0	1.5		R04386		R04386	''			ACCOAC_1				(x(398)) & (x(332))
rxn00790_c	rxn00790	rxn00790		5-Phosphoribosylamine pyrophosphate phosphoribosyltransferase	h2o_c + gln__L_c + prpp_c -> ppi_c + glu__L_c + pram_c	1		1	(CV_2515)	(CV_2515)	Glutamate metabolism	0	0	1000	0	2.2		R01072		R01072	''			GLUPRT				(x(304))
rxn01169_c	rxn01169	rxn01169		ATP D-glucose 6-phosphotransferase	atp_c + glc_bD_c -> adp_c + g6p_B_c	1		1	(CV_0147)	(CV_0147)	Glycolysis/Gluconeogenesis	0	0	1000	0	1.4		R01600		R01600	''			None				(x(83))	As per Metacyc should be forward only
rxn05569_c	rxn05569	rxn05569		D-glucosamine transport via PEP Pyr PTS	pep_c + gam_e -> pyr_c + gam6p_c	1		1	(CV_3052 or CV_0816 or CV_0558 or CV_2311)	(CV_3052 or CV_0816 or CV_0558 or CV_2311)	Transport via PTS	0	0	1000	0	1.5		None		None	''							(x(372) | x(732) | x(685) | x(271))	As per Metacyc should be forward only
rxn00060_c	rxn00060	rxn00060		Porphobilinogen ammonia-lyase polymerizing	h2o_c + 4 ppbng_c -> 4 nh4_c + hmbil_c	1		1	(CV_0054)	(CV_0054)	Porphyrin and chlorophyll metabolism	0	0	1000	0	1.5		R00084		R00084	''			None				(x(670))
rxn00006_c	rxn00006	rxn00006		hydrogen-peroxide hydrogen-peroxide oxidoreductase	2 h2o2_c -> 2 h2o_c + o2_c	1		1	(CV_3549)	(CV_3549)	Glyoxylate and dicarboxylate metabolism	0	0	1000	0	2.2		R00009		R00009	''			CAT	catalase			(x(458))
rxn09202_c	rxn09202	rxn09202		Phosphatidylserine decarboxylase n-C18 0	2 h_c + ps180_c -> co2_c + pe180_c	1		1	(CV_0591)	(CV_0591)	Glycerolipid and Glycerophospholipid metabolism	0	0	1000	0	1.3		None		None	''							(x(694))
rxn03239_c	rxn03239	rxn03239		S-3-Hydroxyhexadecanoyl-CoA NAD oxidoreductase	nad_c + 3hhdcoa_c <=> h_c + nadh_c + 3ohdcoa_c	1		1	(CV_2720)	(CV_2720)	Fatty acid metabolism	1	-1000	1000	0	2.2		R04737		R04737	''			HACD7				(x(323))
rxn05394_c	rxn05394	rxn05394		9-methyl-3-hydroxy-decanoyl-ACP hydro-lyase	cpd11530_c -> h2o_c + cpd11531_c	1		1	(CV_3950) or (CV_2207)	(CV_3950) or (CV_2207)	Fatty acid biosynthesis	0	0	1000	0	1.5		None		None	''							(x(559)) | (x(251))
rxn04050_c	rxn04050	rxn04050		precorrin-6A reductase	h_c + nadph_c + copre6_c <=> nadp_c + codhpre6_c	1		1	(CV_1562)	(CV_1562)	Porphyrin and chlorophyll metabolism	1	-1000	1000	0	1.5		R05812		R05812	''			None				(x(122))
rxn02473_c	rxn02473	rxn02473		D-erythro-1-Imidazol-4-ylglycerol 3-phosphate hydro-lyase	eig3p_c -> h2o_c + imacp_c	1		1	(CV_0614)	(CV_0614)	Histidine metabolism	0	0	1000	0	1.5		R03457		R03457	''			IGPDH				(x(702))
rxn00834_c	rxn00834	rxn00834		IMP NAD oxidoreductase	h2o_c + nad_c + imp_c -> h_c + nadh_c + xmp_c	1		1	(CV_1303)	(CV_1303)	Purine metabolism	0	0	1000	0	1.5		R01130		R01130	''			IMPD				(x(67))
rxn05293_c	rxn05293	rxn05293		MECDPDH	h_c + nadh_c + 2mecdp_c -> h2o_c + nad_c + h2mb4p_c	1		1	(CV_3538)	(CV_3538)	Isoprenoid Biosynthesis	0	0	1000	0	1.1		None		None	''			MECDPDH2				(x(456))
rxn12639_c	rxn12639	rxn12639		aminopeptidase	h2o_c + ala_L_gln__L_c <=> ala__L_c + gln__L_c	1		1	(CV_2694) or (CV_4047) or (CV_1176) or (CV_4047) or (CV_2397 or CV_2334) or (CV_2914)	(CV_2694) or (CV_4047) or (CV_1176) or (CV_4047) or (CV_2397 or CV_2334) or (CV_2914)	Recycling of Peptidoglycan Amino Acids	1	-1000	1000	0	1.1		None		None	''							(x(319)) | (x(579)) | (x(47)) | (x(579)) | (x(289) | x(276)) | (x(353))
rxn03080_c	rxn03080	rxn03080		6 7-Dimethyl-8-1-D-ribityllumazine 6 7-dimethyl-8-1-D-ribityl	4r5au_c + db4p_c -> h_c + 2 h2o_c + pi_c + dmlz_c	1		1	(CV_2390)	(CV_2390)	Riboflavin metabolism	0	0	1000	0	2.2		R04457		R04457	''			DLDLBT				(x(287))
rxn05150_c	rxn05150	rxn05150		Zinc-ABC transport	atp_c + h2o_c + zn2_e -> h_c + adp_c + pi_c + zn2_c	1		1	(CV_3066) and (CV_3064) and (CV_3065)	(CV_3066) and (CV_3064) and (CV_3065)	Transport via ABC	0	0	1000	0	1.3		None		None	''							(x(377)) & (x(375)) & (x(376))
rxn05199_c	rxn05199	rxn05199		Uridine ion-coupled transport	h_e + uri_e <=> h_c + uri_c	1		1	(CV_2040) or (CV_1931)	(CV_2040) or (CV_1931)	Transport ion coupled	1	-1000	1000	0	1.3		None		None	''							(x(222)) | (x(203))
rxn05040_c	rxn05040	rxn05040		3 4-Dihydroxy-2-butanone 4-phosphate synthase	ru5p__D_c -> h_c + for_c + db4p_c	1		1	(CV_2005 or CV_2389) and (CV_4216 or CV_2389)	(CV_2005 or CV_2389) and (CV_4216 or CV_2389)	Riboflavin metabolism	0	0	1000	0	1.5		R07281		R07281	''			DB4PS				(x(215) | x(286)) & (x(629) | x(286))
rxn00350_c	rxn00350	rxn00350		glutathione hydralase	h2o_c + gthrd_c <=> glu__L_c + cgly_c	1		1	(CV_1415)	(CV_1415)	Glutathione metabolism	1	-1000	1000	0	2.2		R00494		R00494	''			None				(x(90))
rxn05326_c	rxn05326	rxn05326		Hexanoyl-acyl-carrier protein malonyl-CoA	h_c + nadh_c + thex2eACP_c -> nad_c + hexACP_c	1		1	(CV_1583) or (CV_3743)	(CV_1583) or (CV_3743)	Fatty acid biosynthesis	0	0	1000	0	2.2		R04955		R04955	''			EAR60x				(x(134)) | (x(516))
rxn09562_c	rxn09562	rxn09562		guanylate kinase GMP dATP	datp_c + gmp_c -> gdp_c + dadp_c	1		1	(CV_3770) or (CV_1849)	(CV_3770) or (CV_1849)	Purine metabolism	0	0	1000	0	1.3		None		None	''			None				(x(526)) | (x(193))	Reversibility changed based on iAF1260
rxn00799_c	rxn00799	rxn00799		S-Malate hydro-lyase	mal__L_c <=> fum_c + h2o_c	1		1	(CV_1120) or (CV_3476)	(CV_1120) or (CV_3476)	TCA Cycle	1	-1000	1000	0	2.2		R01082		R01082	''			FUM	FUM			(x(31)) | (x(449))
rxn00313_c	rxn00313	rxn00313		meso-2 6-Diaminoheptanedioate carboxy-lyase	h_c + 26dap__M_c -> co2_c + lys__L_c	1		1	(CV_3757)	(CV_3757)	Lysine Biosynthesis	0	0	1000	0	1.5		R00451		R00451	''			DAPDC				(x(519))
rxn11944_c	rxn11944	rxn11944		Methyltransferase	hpglu_c + amet_c -> h_c + mhpglu_c + ahcys_c	1		1	(CV_3604)	(CV_3604)	Cysteine and Methionine metabolism	0	0	1000	0	1.1		R04405		R04405	''			MHPGLUT				(x(472))
rxn11268_c	rxn11268	rxn11268		phosphate ABC transporter permease protein	ppi_c + h_c -> h_e + ppi_e	1		1	(CV_0934)	(CV_0934)	Transport via ABC	0	0	1000	0	1.5		None		None	''							(x(753))
rxn05344_c	rxn05344	rxn05344		Tetradecanoyl-acyl-carrier protein malonyl-acyl-carrier-protein	h_c + malACP_c + myrsACP_c -> co2_c + ACP_c + 3opalmACP_c	1		1	(CV_3412 or CV_3948 or CV_1541 or CV_3949) and (CV_3416 or CV_1096 or CV_0805)	(CV_3412 or CV_3948 or CV_1541 or CV_3949) and (CV_3416 or CV_1096 or CV_0805)	Fatty acid biosynthesis	0	0	1000	0	1.5		R04968		R04968	''			3OAS160				(x(432) | x(557) | x(115) | x(558)) & (x(435) | x(24) | x(730))
rxn00676_c	rxn00676	rxn00676		Propanoyl-CoA acetyl-CoA C-acyltransferase	accoa_c + ppcoa_c -> coa_c + 2maacoa_c	1		1	(CV_2719) or (CV_2790)	(CV_2719) or (CV_2790)	Valine, Leucine and Isoleucine degradation	0	0	1000	0	2.2		R00927		R00927	''			ACACT10m				(x(322)) | (x(341))
rxn01281_c	rxn01281	rxn01281		R-Glycerate NADP oxidoreductase	h_c + nadph_c + 2h3oppan_c -> nadp_c + glyc__R_c	1		1	(CV_3870)	(CV_3870)	Glyoxylate and dicarboxylate metabolism	0	0	1000	0	1.1		R01747		R01747	''			None				(x(544))	Only in backward direction according to Metacyc
rxn10226_c	rxn10226	rxn10226		isoheptadecanoyl-CDPdiacylglycerol-serine O-phosphatidyltransferase	ser__L_c + cpd15683_c -> h_c + cmp_c + cpd15689_c	1		1	(CV_1111)	(CV_1111)	Glycerolipid and Glycerophospholipid metabolism	0	0	1000	0	1.3		None		None	''							(x(29))
rxn03246_c	rxn03246	rxn03246		S-Hydroxyoctanoyl-CoA NAD oxidoreductase	nad_c + 3hocoa_c <=> h_c + nadh_c + 3oocoa_c	1		1	(CV_2720)	(CV_2720)	Fatty acid metabolism	1	-1000	1000	0	1.1		R04745		R04745	''			HACD3				(x(323))
rxn00837_c	rxn00837	rxn00837		NADH guanosine-5-phosphate oxidoreductasedeaminating	2 h_c + nadph_c + gmp_c -> nadp_c + nh4_c + imp_c	1		1	(CV_2922)	(CV_2922)	Purine metabolism	0	0	1000	0	1.3		R01134		R01134	''			None				(x(354))
rxn03242_c	rxn03242	rxn03242		S-3-Hydroxydodecanoyl-CoA NAD oxidoreductase	nad_c + 3hddcoa_c <=> h_c + nadh_c + 3oddcoa_c	1		1	(CV_2720)	(CV_2720)	Fatty acid metabolism	1	-1000	1000	0	1.1		R04741		R04741	''			HACD5				(x(323))
rxn08618_c	rxn08618	rxn08618		glucosyltransferase I LPS core synthesis	udpg_c + icolipa_c -> udp_c + gicolipa_c	1		1	(CV_0817)	(CV_0817)	Lipopolysaccharide biosynthesis	0	0	1000	0	1.1		None		None	''							(x(733))
rxn00256_c	rxn00256	rxn00256		Citrate oxaloacetate-lyase pro-3S-CH2COO- -> acetyl-CoA	accoa_c + h2o_c + oaa_c -> h_c + coa_c + cit_c	1		1	(CV_1070)	(CV_1070)	TCA Cycle	0	0	1000	0	2.2		R00351		R00351	''			CS	CS			(x(16))
rxn02503_c	rxn02503	rxn02503		ATP 2-amino-4-hydroxy-6-hydroxymethyl-7 8-dihydropteridine	atp_c + 6hmhpt_c -> amp_c + 6hmhptpp_c	1		1	(CV_1633)	(CV_1633)	Folate biosynthesis	0	0	1000	0	1.3		R03503		R03503	''			HPPK2				(x(148))	Reversibility changed based on iAF1260
rxn05349_c	rxn05349	rxn05349		acetyl-CoA acyl-carrier-protein S-acetyltransferase	accoa_c + ACP_c -> coa_c + acACP_c	1		1	(CV_3412 or CV_3948 or CV_1541 or CV_3949) and (CV_3416 or CV_1096 or CV_0805)	(CV_3412 or CV_3948 or CV_1541 or CV_3949) and (CV_3416 or CV_1096 or CV_0805)	Fatty acid biosynthesis	0	0	1000	0	1.1		R01624		R01624	''			ACOATA				(x(432) | x(557) | x(115) | x(558)) & (x(435) | x(24) | x(730))
rxn00285_c	rxn00285	rxn00285		Succinate CoA ligase ADP-forming	atp_c + coa_c + succ_c -> adp_c + pi_c + succoa_c	1		1	(CV_1075) and (CV_1076)	(CV_1075) and (CV_1076)	TCA Cycle	0	0	1000	0	2.2		R00405		R00405	''			SUCOAS	SUCOAS			(x(20)) & (x(22))	Only forward as per SEED
rxn00547_c	rxn00547	rxn00547		ATP D-fructose 6-phosphotransferase	atp_c + fru_c -> adp_c + f6p_c	1		1	(CV_1424)	(CV_1424)	Fructose and Mannose metabolism	0	0	1000	0	1.3		R00760,R00867,R03920		R00760,R00867,R03920	''			None				(x(92))	Reversibility changed based on iAF1260
rxn00473_c	rxn00473	rxn00473		L-Tryotophan indole-lyase deaminating	h2o_c + trp__L_c -> pyr_c + nh4_c + indole_c	1		1	(CV_1163)	(CV_1163)	Tryptophan metabolism	0	0	1000	0	1.3		R00673		R00673	''			TRPAS2	TRPAS2			(x(42))
rxn01484_c	rxn01484	rxn01484		N-Acetyl-D-glucosamine-6-phosphate amidohydrolase	h2o_c + acgam6p_c <=> ac_c + gam6p_c	1		1	(CV_0556)	(CV_0556)	Aminosugars metabolism	1	-1000	1000	0	1.5		R02059		R02059	''			AGDC				(x(683))
rxn04794_c	rxn04794	rxn04794		Acetyl-CoA formate C-acetyltransferase	coa_c + 2obut_c -> for_c + ppcoa_c	1		1	(CV_1412)	(CV_1412)	Propanoate metabolism	0	0	1000	0	1.5		R06987		R06987	''			OBTFL				(x(88))
rxn01334_c	rxn01334	rxn01334		Sedoheptulose 1 7-bisphosphate D-glyceraldehyde-3-phosphate-lyase	s17bp_c <=> e4p_c + dhap_c	1		1	(CV_0187)	(CV_0187)	Carbon fixation in photosynthetic organisms	1	-1000	1000	0	2.2		R01829		R01829	''			FBA3				(x(183))
rxn00599_c	rxn00599	rxn00599		Succinyl-CoA glycine C-succinyl-transferasedecarboxylating	gly_c + h_c + succoa_c -> coa_c + co2_c + 5aop_c	1		1	(CV_0803)	(CV_0803)	Glycine, Serine and Threonine metabolism	0	0	1000	0	1.3		R00830		R00830	''			ALASm				(x(729))
rxn05200_c	rxn05200	rxn05200		Thymidine ion-coupled transport	h_e + thymd_e <=> h_c + thymd_c	1		1	(CV_2040) or (CV_1931)	(CV_2040) or (CV_1931)	Transport ion coupled	1	-1000	1000	0	1.3		None		None	''							(x(222)) | (x(203))
rxn00770_c	rxn00770	rxn00770		ATP D-ribose-5-phosphate pyrophosphotransferase	atp_c + r5p_c -> amp_c + prpp_c	1		1	(CV_0033) or (CV_4058)	(CV_0033) or (CV_4058)	Pentose Phosphate Pathway	0	0	1000	0	2.2		R01049		R01049	''			PRPPS	PRPPS			(x(350)) | (x(582))	As per Metacyc should be forward only
rxn00192_c	rxn00192	rxn00192		Acetyl-CoA L-glutamate N-acetyltransferase	accoa_c + glu__L_c -> h_c + coa_c + acglu_c	1		1	(CV_3355) or (CV_0478)	(CV_3355) or (CV_0478)	Urea cycle and metabolism of amino groups	0	0	1000	0	1.3		R00259		R00259	''			ACGS				(x(419)) | (x(659))
rxn00611_c	rxn00611	rxn00611		sn-Glycerol-3-phosphate NAD 2-oxidoreductase	h_c + nadh_c + dhap_c -> nad_c + glyc3p_c	1		1	(CV_1129)	(CV_1129)	Glycerolipid and Glycerophospholipid metabolism	0	0	1000	0	1.4		R00842,R05679		R00842,R05679	''			None				(x(35))	Only in backward direction according to Metacyc
rxn00182_c	rxn00182	rxn00182		L-Glutamate NAD oxidoreductase deaminating	h2o_c + nad_c + glu__L_c -> h_c + nadh_c + akg_c + nh4_c	1		1	(CV_3084)	(CV_3084)	D-Glutamine and D-glutamate metabolism	0	0	1000	0	2.2		R00243		R00243	''			GDH				(x(382))	As per Metacyc should be forward only					Bigg Id rxn for mitochondria
rxn00289_c	rxn00289	rxn00289		2S 3R-3-Hydroxybutane-1 2 3-tricarboxylate pyruvate-lyase	micit_c <=> succ_c + pyr_c	1		1	(CV_2057)	(CV_2057)	Propanoate metabolism	1	-1000	1000	0	1.5		R00409		R00409	''			MCITL2				(x(227))
rxn03393_c	rxn03393	rxn03393		Octaprenyl-hydroxybenzoate decarboxylase	h_c + 3ophb_c -> co2_c + 2oph_c	1		1	(CV_3337) or (CV_4104)	(CV_3337) or (CV_4104)	Ubiquinone biosynthesis	0	0	1000	0	1.1		R04986		R04986	''			OPHBDC				(x(414)) | (x(590))
rxn05388_c	rxn05388	rxn05388		5-methyl-hexanoyl-ACP malonyl-acyl-carrier-protein C-acyltransferase decarboxylating	h_c + malACP_c + cpd11524_c -> co2_c + ACP_c + cpd11525_c	1		1	(CV_3412 or CV_3948 or CV_1541 or CV_3949) and (CV_3416 or CV_1096 or CV_0805)	(CV_3412 or CV_3948 or CV_1541 or CV_3949) and (CV_3416 or CV_1096 or CV_0805)	Fatty acid biosynthesis	0	0	1000	0	1.5		None		None	''							(x(432) | x(557) | x(115) | x(558)) & (x(435) | x(24) | x(730))
rxn02085_c	rxn02085	rxn02085		4 5-Dihydro-4-oxo-5-imidazolepropanoate hydro-lyase	h2o_c + urcan_c -> 4izp_c	1		1	(CV_0323)	(CV_0323)	Histidine metabolism	0	0	1000	0	2.2		R02914		R02914	''			URCN				(x(399))	Only in backward direction according to Biocyc
rxn01739_c	rxn01739	rxn01739		ATP shikimate 3-phosphotransferase	atp_c + skm_c -> adp_c + skm5p_c	1		1	(CV_0828)	(CV_0828)	Phenylalanine, Tyrosine and Tryptophan biosynthesis	0	0	1000	0	1.1		R02412		R02412	''			SHKK	SHKK			(x(737))
rxn00347_c	rxn00347	rxn00347		L-Aspartate ammonia-lyase	asp__L_c -> fum_c + nh4_c	1		1	(CV_4112)	(CV_4112)	Alanine, Aspartate and Glutamine metabolism/Nitrogen metabolism	0	0	1000	0	1.5		R00490		R00490	''			None				(x(591))	As per Metacyc should be forward only
rxn10052_c	rxn10052	rxn10052		adenylate kinase Inorganic triphosphate	h_c + amp_c + pppi_c -> ppi_c + adp_c	1		1	(CV_3343)	(CV_3343)	Purine metabolism	0	0	1000	0	1.5		None		None	''			ADK2				(x(415))	Only forward to avoid futile cycles
rxn05406_c	rxn05406	rxn05406		15-methyl-3-hydroxy-hexa-decanoyl-ACP hydro-lyase	cpd11542_c -> h2o_c + cpd11543_c	1		1	(CV_3950) or (CV_2207)	(CV_3950) or (CV_2207)	Fatty acid biosynthesis	0	0	1000	0	1.5		None		None	''							(x(559)) | (x(251))
rxn05206_c	rxn05206	rxn05206		Potassium uptake	k_e <=> k_c	1		1	(CV_2330) or (CV_2962)	(CV_2330) or (CV_2962)	Transport	1	-1000	1000	0	1		None		None	''							(x(275)) | (x(356))
rxn00102_c	rxn00102	rxn00102		Carbonic acid hydro-lyase	co2_c + h2o_c -> h_c + hco3_c	1		1	(CV_0520) or (CV_0168) or (CV_1136) or (CV_1881)	(CV_0520) or (CV_0168) or (CV_1136) or (CV_1881)	Nitrogen metabolism	0	0	1000	0	1.5		R00132		R00132	''			None				(x(676)) | (x(142)) | (x(38)) | (x(194))
rxn03236_c	rxn03236	rxn03236		4a-hydroxytetrahydrobiopterin hydro-lyase	cpd03897_c <=> h2o_c + dhbpt_c	1		1	(CV_2366)	(CV_2366)	Pterin metabolism	1	-1000	1000	0	1.3		R04734		R04734	''			None				(x(281))
rxn05235_c	rxn05235	rxn05235		Ribonucleotide reductase CTP	trdrd_c + ctp_c -> dctp_c + h2o_c + trdox_c	1		1	(CV_2412)	(CV_2412)	Pyrimidine metabolism	0	0	1000	0	1.5		R02022		R02022	''			RNTR3				(x(291))
rxn01521_c	rxn01521	rxn01521		5-nucleotidase dUMP	h2o_c + dump_c -> h_c + pi_c + duri_c	1		1	(CV_3083 or CV_1743) or (CV_3679)	(CV_3083 or CV_1743) or (CV_3679)	Pyrimidine metabolism	0	0	1000	0	1.5		R02102		R02102	''			NTD1				(x(381) | x(172)) | (x(496))
rxn00097_c	rxn00097	rxn00097		ATP AMP phosphotransferase	atp_c + amp_c -> 2 adp_c	1		1	(CV_3343)	(CV_3343)	Purine metabolism	0	0	1000	0	1.5		R00127		R00127	''			ADK1	ADK1			(x(415))	Only forward to avoid futile cycles
rxn06591_c	rxn06591	rxn06591		L-glutamate-semialdehyde NADP	h_c + nadph_c + glutrna_c <=> nadp_c + glu1sa_c + trnaglu_c	1		1	(CV_0079)	(CV_0079)	Porphyrin and chlorophyll metabolism	1	-1000	1000	0	1.5		R04109		R04109	''			GLUTRR				(x(724))
rxn00126_c	rxn00126	rxn00126		ATP L-methione S-adenosyltransferase	atp_c + h2o_c + met__L_c -> ppi_c + pi_c + amet_c	1		1	(CV_0963)	(CV_0963)	Methionine metabolism	0	0	1000	0	1		R00177		R00177	''			MATm				(x(776))
rxn00414_c	rxn00414	rxn00414		Carbon-dioxide L-glutamine amido-ligase ADP-forming	2 atp_c + h2o_c + hco3_c + gln__L_c -> h_c + 2 adp_c + pi_c + glu__L_c + cbp_c	1		1	(CV_3804) and (CV_3802)	(CV_3804) and (CV_3802)	Glutamate metabolism	0	0	1000	0	2.2		R00575		R00575	''			CBPS				(x(538)) & (x(537))
rxn05547_c	rxn05547	rxn05547		Dipeptide transport via ABC system gly-gln	atp_c + h2o_c + gly_gln__L_e -> h_c + adp_c + pi_c + gly_gln__L_c	1		1	(CV_3936) or (CV_1097) or (CV_3426) or (CV_2688)	(CV_3936) or (CV_1097) or (CV_3426) or (CV_2688)	Transport via ABC	0	0	1000	0	1.3		None		None	''							(x(554)) | (x(25)) | (x(439)) | (x(316))
rxn06937_c	rxn06937	rxn06937		L-Glutamate tRNAGlu ligase AMP-forming	h_c + atp_c + glu__L_c + trnaglu_c -> ppi_c + amp_c + glutrna_c	1		1	(CV_1937)	(CV_1937)	Glutamate metabolism	0	0	1000	0	1.5		R05578		R05578	''			GLUTRS				(x(207))
rxn05937_c	rxn05937	rxn05937		Ferredoxin NADP oxidoreductase	h_c + nadp_c + fdxrd_c -> nadph_c + fdxox_c	1		1	(CV_4045) or (CV_0886)	(CV_4045) or (CV_0886)	Oxidative phosphorylation	0	0	1000	0	1.3		None		None	''							(x(578)) | (x(746))
rxn05365_c	rxn05365	rxn05365		6-methyl-3-hydroxy-octanoyl-ACP hydro-lyase	cpd11501_c -> h2o_c + cpd11502_c	1		1	(CV_3950) or (CV_2207)	(CV_3950) or (CV_2207)	Fatty acid biosynthesis	0	0	1000	0	1.5		None		None	''							(x(559)) | (x(251))
rxn03445_c	rxn03445	rxn03445		O-Phospho-4-hydroxy-L-threonine 2-oxoglutarate aminotransferase	glu__L_c + ohpb_c -> akg_c + phthr_c	1		1	(CV_2301)	(CV_2301)	Vitamin B6 metabolism	0	0	1000	0	1.3		R05085		R05085	''			OHPBAT				(x(266))
rxn05546_c	rxn05546	rxn05546		Dipeptide transport via ABC system gly-asn	atp_c + h2o_c + gly_asn__L_e -> h_c + adp_c + pi_c + gly_asn__L_c	1		1	(CV_3936) or (CV_1097) or (CV_3426) or (CV_2688)	(CV_3936) or (CV_1097) or (CV_3426) or (CV_2688)	Transport via ABC	0	0	1000	0	1.3		None		None	''							(x(554)) | (x(25)) | (x(439)) | (x(316))
rxn02508_c	rxn02508	rxn02508		N-5-Phospho-beta-D-ribosylanthranilate ketol-isomerase	pran_c -> 2cpr5p_c	1		1	(CV_2763 or CV_2712)	(CV_2763 or CV_2712)	Phenylalanine, Tyrosine and Tryptophan biosynthesis	0	0	1000	0	1.1		R03509		R03509	''			PRAli	PRAIi			(x(335) | x(321))
rxn05638_c	rxn05638	rxn05638		L-proline transport in via proton symport	h_e + pro__L_e -> h_c + pro__L_c	1		1	(CV_2901)	(CV_2901)	Transport via Proton Symport	0	0	1000	0	1.5		None		None	''							(x(351))	Only forward as per SEED
rxn08801_c	rxn08801	rxn08801		Lysophospholipase L1 2-acylglycerophosphotidate n-C18 0	h2o_c + 1odecg3p_c -> h_c + glyc3p_c + ocdca_c	1		1	(CV_0167)	(CV_0167)	Glycerolipid and Glycerophospholipid metabolism	0	0	1000	0	1.3		None		None	''							(x(138))
rxn00712_c	rxn00712	rxn00712		UTP uridine 5-phosphotransferase	uri_c + utp_c -> ump_c + udp_c	1		1	(CV_1085)	(CV_1085)	Pyrimidine metabolism	0	0	1000	0	1.5		R00967		R00967	''			UTUP				(x(23))	As per Metacyc should be forward only
rxn05516_c	rxn05516	rxn05516		cadmium transport out via ABC system	atp_c + h2o_c + cd2_c -> h_c + adp_c + pi_c + cd2_e	1		1	(CV_3217) or (CV_1265) or (CV_1154) or (CV_2748)	(CV_3217) or (CV_1265) or (CV_1154) or (CV_2748)	Transport via ABC	0	0	1000	0	1.3		None		None	''							(x(400)) | (x(62)) | (x(41)) | (x(330))
rxn05439_c	rxn05439	rxn05439		5-methyl-trans-hex-2-enoyl-ACP NAD oxidoreductase A-specific	h_c + nadh_c + cpd11523_c -> nad_c + cpd11524_c	1		1	(CV_1583) or (CV_3743)	(CV_1583) or (CV_3743)	Fatty acid biosynthesis	0	0	1000	0	1.1		None		None	''							(x(134)) | (x(516))
rxn05339_c	rxn05339	rxn05339		3R-3-Hydroxybutanoyl-acyl-carrier protein NADP oxidoreductase	h_c + nadph_c + actACP_c -> nadp_c + 3hbutACP_c	1		1	(CV_3414) or (CV_3947) or (CV_2707) or (CV_2258) or (CV_1046) or (CV_3576) or (CV_1546) or (CV_3406)	(CV_3414) or (CV_3947) or (CV_2707) or (CV_2258) or (CV_1046) or (CV_3576) or (CV_1546) or (CV_3406)	Fatty acid biosynthesis	0	0	1000	0	1.3		R04533		R04533	''			3OAR40_1				(x(433)) | (x(556)) | (x(320)) | (x(260)) | (x(9)) | (x(468)) | (x(117)) | (x(428))
rxn01128_c	rxn01128	rxn01128		dATP cytidine 5-phosphotransferase	cytd_c + datp_c -> cmp_c + dadp_c	1		1	(CV_1085)	(CV_1085)	Pyrimidine metabolism	0	0	1000	0	1.5		R01548		R01548	''			DATCY				(x(23))	Reversibility changed based on iAF1260
rxn05644_c	rxn05644	rxn05644		D-ribose transport out via ABC system	atp_c + h2o_c + rib__D_c -> h_c + adp_c + pi_c + rib__D_e	1		1	(CV_3016 or CV_3015) and (CV_3017) and (CV_3018) and (CV_3019)	(CV_3016 or CV_3015) and (CV_3017) and (CV_3018) and (CV_3019)	Transport via ABC	0	0	1000	0	1		None		None	''							(x(360) | x(359)) & (x(361)) & (x(362)) & (x(363))
rxn00224_c	rxn00224	rxn00224		Protoporphyrin ferro-lyase	fe2_c + ppp9_c -> 2 h_c + pheme_c	1		1	(CV_2480)	(CV_2480)	Porphyrin and chlorophyll metabolism	0	0	1000	0	1.4		R00310		R00310	''			FCLT				(x(299))
rxn00569_c	rxn00569	rxn00569		ammonium-hydroxide NADP oxidoreductase	5 h_c + 3 nadph_c + no2_c -> 2 h2o_c + 3 nadp_c + nh4_c	1		1	(peg.2230)	(peg.2230)	Nitrogen metabolism	0	0	1000	0	2.1		None		None	''							(x(254))
rxn00139_c	rxn00139	rxn00139		AMP pyrophosphate phosphoribosyltransferase	prpp_c + ade_c -> ppi_c + amp_c	1		1	(CV_3772)	(CV_3772)	Purine metabolism	0	0	1000	0	1.5		R00190		R00190	''			ADPT				(x(528))
rxn02304_c	rxn02304	rxn02304		Protoporphyrinogen-IX oxygen oxidoreductase	3 o2_c + 2 pppg9_c -> 6 h2o_c + 2 ppp9_c	1		1	(CV_1653)	(CV_1653)	Porphyrin and chlorophyll metabolism	0	0	1000	0	1.5		R03222		R03222	''			PPPGO_1				(x(158))
rxn05736_c	rxn05736	rxn05736		fatty-acid--CoA ligase tetradecanoate	h_c + atp_c + coa_c + ttdca_c -> ppi_c + amp_c + tdcoa_c	1		1	(CV_0898) or (CV_1780) or (CV_0093) or (CV_1486) or (CV_2802) or (CV_2803) or (CV_4051) or (CV_1459)	(CV_0898) or (CV_1780) or (CV_0093) or (CV_1486) or (CV_2802) or (CV_2803) or (CV_4051) or (CV_1459)	Fatty acid metabolism	0	0	1000	0	1.3		R00390		R00390	''			None				(x(747)) | (x(182)) | (x(742)) | (x(101)) | (x(342)) | (x(343)) | (x(580)) | (x(96))
rxn00931_c	rxn00931	rxn00931		L-Proline NADP 5-oxidoreductase	h_c + nadph_c + 1pyr5c_c -> nadp_c + pro__L_c	1		1	(CV_0177)	(CV_0177)	Arginine and proline metabolism	0	0	1000	0	1.5		R01251		R01251	''			P5CR				(x(166))	Only in backward direction according to Metacyc
rxn03904_c	rxn03904	rxn03904		UDPMurAcoyl-L-Ala-D-gamma-Glu-L-Lys-D-Ala-D-Ala undecaprenyl-	ugmda_c + udcpp_c -> ump_c + uagmda_c	1		1	(CV_4346)	(CV_4346)	Peptidoglycan biosynthesis	0	0	1000	0	1.5		R05630		R05630	''			None				(x(649))
rxn02465_c	rxn02465	rxn02465		N-Acetyl-L-glutamate-5-semialdehyde NADP 5-oxidoreductase	nadph_c + acg5p_c -> pi_c + nadp_c + acg5sa_c	1		1	(CV_3695)	(CV_3695)	Urea cycle and metabolism of amino groups	0	0	1000	0	1.3		R03443		R03443	''			AGGPR				(x(502))
rxn08335_c	rxn08335	rxn08335		dihydoorotic acid dehydrogenase quinone8	q8_c + dhor__S_c -> q8h2_c + orot_c	1		1	(CV_1812) or (CV_3551)	(CV_1812) or (CV_3551)	De Novo Pyrimidine Synthesis	0	0	1000	0	1.3		None		None	''							(x(187)) | (x(459))
rxn08711_c	rxn08711	rxn08711		heptosyltransferase II LPS core synthesis	adphep_LD_c + hlipa_c -> adp_c + hhlipa_c	1		1	(CV_2092)	(CV_2092)	Lipopolysaccharide biosynthesis	0	0	1000	0	1.1		None		None	''							(x(234))
rxn03513_c	rxn03513	rxn03513		S-Adenosyl-L-methionine precorrin-3B C17-methyltransferase	amet_c + pre3b_c <=> 2 h_c + ahcys_c + pre4_c	1		1	(CV_1562)	(CV_1562)	Porphyrin and chlorophyll metabolism	1	-1000	1000	0	1.3		R05180		R05180	''			PC17M				(x(122))
rxn00549_c	rxn00549	rxn00549		D-Fructose-1 6-bisphosphate 1-phosphohydrolase	h2o_c + fdp_c -> h_c + pi_c + f6p_c	1		1	(CV_2427)	(CV_2427)	Glycolysis/Gluconeogenesis	0	0	1000	0	1.5		R00762,R04780		R00762,R04780	''			FBP	FBP			(x(292))
rxn01679_c	rxn01679	rxn01679		dUTP uridine 5-phosphotransferase	uri_c + dutp_c -> ump_c + dudp_c	1		1	(CV_1085)	(CV_1085)	Pyrimidine metabolism	0	0	1000	0	1.5		R02332		R02332	''			DUTUP				(x(23))	As per Metacyc should be forward only
rxn01871_c	rxn01871	rxn01871		acetyl-CoA enzyme N6-dihydrolipoyllysine S-acetyltransferase	accoa_c + dhlam_c <=> coa_c + adhlam_c	1		1	(CV_0527)	(CV_0527)	TCA Cycle	1	-1000	1000	0	1.5		R02569		R02569	''			None				(x(678))
rxn01257_c	rxn01257	rxn01257		chorismate L-glutamine aminotransferase	chor_c + gln__L_c -> glu__L_c + 4adcho_c	1		1	(CV_2175)	(CV_2175)	Folate biosynthesis	0	0	1000	0	1.3		R01716		R01716	''			ADCS				(x(242))
rxn05029_c	rxn05029	rxn05029		ATP cobinamide Cobeta-adenosyltransferase	atp_c + cbi_c -> adocbi_c + pppi_c	1		1	(CV_1557) or (CV_2911)	(CV_1557) or (CV_2911)	Porphyrin and chlorophyll metabolism	0	0	1000	0	1.3		R07268		R07268	''			CBIAT				(x(121)) | (x(352))
rxn05604_c	rxn05604	rxn05604		malate-H/Na-lactate antiporter	2 h_e + na1_c + lac__L_c + mal__L_e <=> 2 h_c + mal__L_c + na1_e + lac__L_e	1		1	(CV_2167)	(CV_2167)	Transport via antiport	1	-1000	1000	0	1.3		None		None	''							(x(237))
rxn05401_c	rxn05401	rxn05401		13-methyl-3-oxo-tetra-decanoyl-ACP NADP oxidoreductase	h_c + nadph_c + cpd11537_c -> nadp_c + cpd11538_c	1		1	(CV_3414) or (CV_3947) or (CV_2707) or (CV_2258) or (CV_1046) or (CV_3576) or (CV_1546) or (CV_3406)	(CV_3414) or (CV_3947) or (CV_2707) or (CV_2258) or (CV_1046) or (CV_3576) or (CV_1546) or (CV_3406)	Fatty acid biosynthesis	0	0	1000	0	1.1		None		None	''							(x(433)) | (x(556)) | (x(320)) | (x(260)) | (x(9)) | (x(468)) | (x(117)) | (x(428))
rxn05613_c	rxn05613	rxn05613		L-methionine S-oxide transport via ABC system	atp_c + h2o_c + metsox_S__L_e -> h_c + adp_c + pi_c + metsox_S__L_c	1		1	(CV_2297) and (CV_2296)	(CV_2297) and (CV_2296)	Transport via ABC	0	0	1000	0	1		None		None	''							(x(264)) & (x(263))
rxn01265_c	rxn01265	rxn01265		Nicotinate D-ribonucleotide pyrophosphate phosphoribosyltransferase	h_c + nac_c + prpp_c -> ppi_c + nicrnt_c	1		1	(CV_3422)	(CV_3422)	Nicotinate and nicotinamide metabolism	0	0	1000	0	1.3		R01724		R01724	''			NAMNPP				(x(438))
rxn03535_c	rxn03535	rxn03535		ATP cobIyrinic acid-a c-diamide Cobeta-adenosyltransferase	atp_c + co1dam_c -> pppi_c + adcobdam_c	1		1	(CV_1557) or (CV_2911)	(CV_1557) or (CV_2911)	Porphyrin and chlorophyll metabolism	0	0	1000	0	1.3		R05220		R05220	''			CYRDAAT				(x(121)) | (x(352))	Reversibility changed based on iAF1260
rxn01740_c	rxn01740	rxn01740		Shikimate NADP 5-oxidoreductase	h_c + nadph_c + 3dhsk_c -> nadp_c + skm_c	1		1	(CV_3587)	(CV_3587)	Phenylalanine, Tyrosine and Tryptophan biosynthesis	0	0	1000	0	1.1		R02413		R02413	''			SHK3Dr	SHK3Dr			(x(469))
rxn12847_c	rxn12847	rxn12847		Gly-Try aminopeptidase	h2o_c + gly_tyr__L_c <=> gly_c + tyr__L_c	1		1	(CV_2694) or (CV_4047) or (CV_1176) or (CV_4047) or (CV_2397 or CV_2334) or (CV_2914)	(CV_2694) or (CV_4047) or (CV_1176) or (CV_4047) or (CV_2397 or CV_2334) or (CV_2914)	Recycling of Peptidoglycan Amino Acids	1	-1000	1000	0	1.3		None		None	''							(x(319)) | (x(579)) | (x(47)) | (x(579)) | (x(289) | x(276)) | (x(353))
rxn03250_c	rxn03250	rxn03250		S-Hydroxyhexanoyl-CoA hydro-lyase	3hhcoa_c <=> h2o_c + hx2coa_c	1		1	(CV_2720) or (CV_1553) or (CV_2485)	(CV_2720) or (CV_1553) or (CV_2485)	Fatty acid metabolism	1	-1000	1000	0	1.1		R04749		R04749	''			ECOAH2				(x(323)) | (x(118)) | (x(302))
rxn05371_c	rxn05371	rxn05371		8-methyl-decanoyl-ACP malonyl-acyl-carrier-protein C-acyltransferase decarboxylating	h_c + malACP_c + cpd11507_c -> co2_c + ACP_c + cpd11508_c	1		1	(CV_3412 or CV_3948 or CV_1541 or CV_3949) and (CV_3416 or CV_1096 or CV_0805)	(CV_3412 or CV_3948 or CV_1541 or CV_3949) and (CV_3416 or CV_1096 or CV_0805)	Fatty acid biosynthesis	0	0	1000	0	1.5		None		None	''							(x(432) | x(557) | x(115) | x(558)) & (x(435) | x(24) | x(730))
rxn00083_c	rxn00083	rxn00083		NADPH NAD oxidoreductase B-specific	nad_c + nadph_c <=> nadh_c + nadp_c	1		0	(CV_0100) or (CV_0099 and CV_0101)	(CV_0100) or (CV_0099)	Nicotinate and nicotinamide metabolism	1	-1000	1000	0	1		R00112		R00112	''			NADTRHD	NADTRHD			(x(756)) | (x(752) & x(839))	Reversible in Biocyc but forward in iAF1260, backward in b. cenocepacea					but irrev in iDB149
rxn05347_c	rxn05347	rxn05347		Acyl-acyl-carrier-protein malonyl-acyl-carrier-protein	h_c + malACP_c + acACP_c -> co2_c + ACP_c + actACP_c	1		1	(CV_3412 or CV_3948 or CV_1541 or CV_3949) and (CV_3416 or CV_1096 or CV_0805)	(CV_3412 or CV_3948 or CV_1541 or CV_3949) and (CV_3416 or CV_1096 or CV_0805)	Fatty acid biosynthesis	0	0	1000	0	1.3		R04355		R04355	''			KAS14				(x(432) | x(557) | x(115) | x(558)) & (x(435) | x(24) | x(730))
rxn05338_c	rxn05338	rxn05338		3R-3-Hydroxydecanoyl-acyl-carrier-protein NADP oxidoreductase	h_c + nadph_c + 3odecACP_c -> nadp_c + 3hdecACP_c	1		1	(CV_3414) or (CV_3947) or (CV_2707) or (CV_2258) or (CV_1046) or (CV_3576) or (CV_1546) or (CV_3406)	(CV_3414) or (CV_3947) or (CV_2707) or (CV_2258) or (CV_1046) or (CV_3576) or (CV_1546) or (CV_3406)	Fatty acid biosynthesis	0	0	1000	0	1.3		R04534		R04534	''			3OAR100				(x(433)) | (x(556)) | (x(320)) | (x(260)) | (x(9)) | (x(468)) | (x(117)) | (x(428))
rxn00416_c	rxn00416	rxn00416		L-aspartate L-glutamine amido-ligase AMP-forming	atp_c + h2o_c + asp__L_c + gln__L_c -> ppi_c + glu__L_c + amp_c + asn__L_c	1		1	(CV_3959) or (CV_1713) or (CV_0797)	(CV_3959) or (CV_1713) or (CV_0797)	Alanine, Aspartate and Glutamine metabolism/Nitrogen metabolism	0	0	1000	0	1.5		R00578		R00578	''			ASNS1				(x(561)) | (x(169)) | (x(728))
rxn00165_c	rxn00165	rxn00165		L-serine ammonia-lyase	ser__L_c -> pyr_c + nh4_c	1		1	(CV_2874) or (CV_1408)	(CV_2874) or (CV_1408)	Glycine, Serine and Threonine metabolism	0	0	1000	0	2.2		R00220,R00223		R00220,R00223	''			None				(x(347)) | (x(85))
rxn01129_c	rxn01129	rxn01129		dATP uridine 5-phosphotransferase	uri_c + datp_c -> ump_c + dadp_c	1		1	(CV_1085)	(CV_1085)	Pyrimidine metabolism	0	0	1000	0	1.5		R01549		R01549	''			DATUP				(x(23))	Reversibility changed based on iAF1260
rxn00903_c	rxn00903	rxn00903		L-Valine 2-oxoglutarate aminotransferase	glu__L_c + 3mob_c -> val__L_c + akg_c	1		1	(CV_2094)	(CV_2094)	Valine, Leucine and Isoleucine Biosynthesis	0	0	1000	0	1.5		R01214		R01214	''			BCTA_val_h				(x(235))
rxn00947_c	rxn00947	rxn00947		Palmitate CoA ligase AMP-forming	h_c + atp_c + coa_c + hdca_c -> ppi_c + amp_c + pmtcoa_c	1		1	(CV_0898 or CV_1780 or CV_0093 or CV_1486 or CV_2802 or CV_2803 or CV_4051 or CV_1459) or (CV_1758)	(CV_0898 or CV_1780 or CV_0093 or CV_1486 or CV_2802 or CV_2803 or CV_4051 or CV_1459) or (CV_1758)	Fatty acid metabolism	0	0	1000	0	1.5		R01280		R01280	''			FACOAL160				(x(747) | x(182) | x(742) | x(101) | x(342) | x(343) | x(580) | x(96)) | (x(176))
rxn03394_c	rxn03394	rxn03394		rxn03394	h_c + nadph_c + o2_c + 2oph_c -> h2o_c + nadp_c + 2ohph_c	1		1	(CV_0991)	(CV_0991)	Ubiquinone biosynthesis	0	0	1000	0	1.1		R04987		R04987	''			None				(x(784))
rxn05400_c	rxn05400	rxn05400		11-methyl-dodecanoyl-ACP malonyl-acyl-carrier-protein C-acyltransferase decarboxylating	h_c + malACP_c + cpd11536_c -> co2_c + ACP_c + cpd11537_c	1		1	(CV_3412 or CV_3948 or CV_1541 or CV_3949) and (CV_3416 or CV_1096 or CV_0805)	(CV_3412 or CV_3948 or CV_1541 or CV_3949) and (CV_3416 or CV_1096 or CV_0805)	Fatty acid biosynthesis	0	0	1000	0	1.5		None		None	''							(x(432) | x(557) | x(115) | x(558)) & (x(435) | x(24) | x(730))
rxn05233_c	rxn05233	rxn05233		Ribonucleotide reductase GDP	trdrd_c + gdp_c -> h2o_c + trdox_c + dgdp_c	1		1	(CV_2284) or (CV_2287)	(CV_2284) or (CV_2287)	Purine metabolism	0	0	1000	0	1.5		R02019		R02019	''			RNDR2				(x(261)) | (x(262))
rxn00274_c	rxn00274	rxn00274		Succinyl-CoA glycine C-succinyl-transferasedecarboxylating	coa_c + 2aobut_c -> gly_c + accoa_c	1		1	(CV_1650) or (CV_0021)	(CV_1650) or (CV_0021)	Glycine, Serine and Threonine metabolism	0	0	1000	0	2.2		R00371		R00371	''			GLYAT				(x(155)) | (x(217))	Only in backward direction according to Metacyc
rxn05442_c	rxn05442	rxn05442		11-methyl-trans-dodec-2-enoyl-ACP NAD oxidoreductase A-specific	h_c + nadh_c + cpd11535_c -> nad_c + cpd11536_c	1		1	(CV_1583) or (CV_3743)	(CV_1583) or (CV_3743)	Fatty acid biosynthesis	0	0	1000	0	1.1		None		None	''							(x(134)) | (x(516))
rxn00838_c	rxn00838	rxn00838		IMP L-aspartate ligase GDP-forming	gtp_c + asp__L_c + imp_c -> 2 h_c + pi_c + gdp_c + dcamp_c	1		1	(CV_0697) or (CV_3528)	(CV_0697) or (CV_3528)	Purine metabolism	0	0	1000	0	1.4		R01135		R01135	''			ADSS				(x(722)) | (x(453))
rxn10265_c	rxn10265	rxn10265		isoheptadecanoyl-Phosphatidylglycerophosphate phosphohydrolase	h2o_c + cpd15716_c -> h_c + pi_c + cpd15722_c	1		1	(CV_2393)	(CV_2393)	Glycerolipid and Glycerophospholipid metabolism	0	0	1000	0	1.4		None		None	''							(x(288))
rxn00141_c	rxn00141	rxn00141		S-Adenosyl-L-homocysteine hydrolase	h2o_c + ahcys_c -> hcys__L_c + adn_c	1		1	(CV_0965)	(CV_0965)	Methionine metabolism	0	0	1000	0	2.2		R00192		R00192	''			ADSHm				(x(777))
rxn05651_c	rxn05651	rxn05651		sulfate transport in via proton symport	h_e + so4_e -> h_c + so4_c	1		1	(CV_1722)	(CV_1722)	Transport via Proton Symport	0	0	1000	0	1		None		None	''							(x(170))	Reversibility changed for BIOLOG data corrections
rxn03990_c	rxn03990	rxn03990		nitric oxide NADPH2 oxygen oxidoreductase	nadh_c + 2 o2_c + 2 no_c -> h_c + nad_c + 2 no3_c	1		1	(CV_3488)	(CV_3488)	Flavohaemoglobin	0	0	1000	0	1.4		R05724		R05724	''			NODOx				(x(451))	As per Metacyc should be forward only
rxn01314_c	rxn01314	rxn01314		NADPH 6 7-dihydropteridine oxidoreductase	h_c + nadph_c + dhbpt_c <=> nadp_c + thbpt_c	1		1	(CV_2244)	(CV_2244)	Folate biosynthesis	1	-1000	1000	0	1.3		R01794		R01794	''			None				(x(256))
rxn01859_c	rxn01859	rxn01859		Deoxyadenosine orthophosphate ribosyltransferase	h_c + pi_c + dad_2_c -> 2dr1p_c + ade_c	1		1	(CV_4097) or (CV_3698)	(CV_4097) or (CV_3698)	Purine metabolism	0	0	1000	0	1.5		R02557		R02557	''			PUNP2				(x(585)) | (x(505))	As per Metacyc should be forward only
rxn10202_c	rxn10202	rxn10202		palmitoyl-glycerol-3-phosphate O-acyltransferase	glyc3p_c + pmtcoa_c -> coa_c + 1hdecg3p_c	1		1	(CV_3688) and (CV_3417)	(CV_3688) and (CV_3417)	Glycerolipid and Glycerophospholipid metabolism	0	0	1000	0	1.5		None		None	''							(x(498)) & (x(436))
rxn00337_c	rxn00337	rxn00337		ATP L-aspartate 4-phosphotransferase	h_c + atp_c + asp__L_c -> adp_c + 4pasp_c	1		1	(CV_1018)	(CV_1018)	Lysine Biosynthesis	0	0	1000	0	1.5		R00480		R00480	''			ASPK				(x(5))
rxn01452_c	rxn01452	rxn01452		S-3-Hydroxybutanoyl-CoA NADP oxidoreductase	h_c + nadph_c + aacoa_c -> nadp_c + 3hbcoa_c	1		1	(CV_2086)	(CV_2086)	Butanoate metabolism	0	0	1000	0	2.2		R01976		R01976	''			HBCO_nadp				(x(232))	Only in backward direction according to Metacyc
rxn01445_c	rxn01445	rxn01445		2-Deoxyguanosine 5-monophosphate phosphohydrolase	h2o_c + dgmp_c -> h_c + pi_c + dgsn_c	1		1	(CV_3083) or (CV_1743)	(CV_3083) or (CV_1743)	Purine metabolism	0	0	1000	0	1.5		R01968		R01968	''			NTD8				(x(381)) | (x(172))
rxn00777_c	rxn00777	rxn00777		D-Ribose-5-phosphate ketol-isomerase	ru5p__D_c -> r5p_c	1		1	(CV_1260)	(CV_1260)	Pentose Phosphate Pathway	0	0	1000	0	1.5		R01056		R01056	''			RPI	RPI			(x(59))
rxn02889_c	rxn02889	rxn02889		3-Methylcrotonoyl-CoA carbon-dioxide ligase ADP-forming	atp_c + hco3_c + 3mb2coa_c -> h_c + adp_c + pi_c + 3mgcoa_c	1		1	(CV_1762 or CV_0018 or CV_0019 or CV_1764)	(CV_1762 or CV_0018 or CV_0019 or CV_1764)	Valine, Leucine and Isoleucine degradation	0	0	1000	0	1.1		R04138		R04138	''			MCCC				(x(178) | x(168) | x(184) | x(180))	Reversibility changed based on iAF1260
rxn05602_c	rxn05602	rxn05602		L-lactate reversible transport via proton symport	h_e + lac__L_e <=> h_c + lac__L_c	1		1	(CV_3026)	(CV_3026)	Transport via Proton Symport	1	-1000	1000	0	1.3		None		None	''			D-LACt2	D-LACt2			(x(366))
rxn01512_c	rxn01512	rxn01512		ATP nucleoside-diphosphate phosphatransferase	atp_c + dtdp_c -> adp_c + dttp_c	1		1	(CV_3542)	(CV_3542)	Pyrimidine metabolism	0	0	1000	0	1.5		R02093		R02093	''			NDPK4				(x(457))	Only forward to avoid futile cycles
rxn01466_c	rxn01466	rxn01466		Geranyl-diphosphate isopentenyl-diphosphate geranyltrans-transferase	ipdp_c + grdp_c -> ppi_c + frdp_c	1		1	(CV_2691 or CV_3954) and (CV_0847 or CV_2691 or CV_3954) and (CV_2691 or CV_3954) and (CV_2691 or CV_3954)	(CV_2691 or CV_3954) and (CV_0847 or CV_2691 or CV_3954) and (CV_2691 or CV_3954) and (CV_2691 or CV_3954)	Terpenoid biosynthesis	0	0	1000	0	1.3		R02003		R02003	''			FPPSh				(x(317) | x(560)) & (x(738) | x(317) | x(560)) & (x(317) | x(560)) & (x(317) | x(560))
rxn02185_c	rxn02185	rxn02185		2-Acetolactate pyruvate-lyase carboxylating	alac__S_c + thmpp_c <=> pyr_c + 2ahethmpp_c	1		1	(CV_0587) and (CV_3889 or CV_0586)	(CV_0587) and (CV_3889 or CV_0586)	Valine, Leucine and Isoleucine Biosynthesis	1	-1000	1000	0	1.5		R03050,R04672		R03050,R04672	''			None				(x(692)) & (x(546) | x(691))
rxn05358_c	rxn05358	rxn05358		2-methylbutanoyl-CoA acyl-carrier-protein transferase	ACP_c + 2mbcoa_c -> coa_c + cpd11495_c	1		1	(CV_3415)	(CV_3415)	Fatty acid biosynthesis	0	0	1000	0	1.1		None		None	''							(x(434))
rxn08200_c	rxn08200	rxn08200		CDP-Diacylglycerol pyrophostatase n-C14 0	h2o_c + cdpdtdecg_c -> cmp_c + pa140_c	1		1	(CV_4315)	(CV_4315)	Glycerolipid and Glycerophospholipid metabolism	0	0	1000	0	1.3		None		None	''							(x(643))
rxn01106_c	rxn01106	rxn01106		2-Phospho-D-glycerate 2 3-phosphomutase	2pg_c <=> 3pg_c	1		1	(CV_3352 or CV_0492 or CV_3211)	(CV_3352 or CV_0492 or CV_3211)	Glycolysis/Gluconeogenesis	1	-1000	1000	0	2.2		R01518		R01518	''			PGM	PGM			(x(418) | x(664) | x(847))	Reversible in Biocyc, iAF1260					add genes
rxn00784_c	rxn00784	rxn00784		2-Deoxy-D-ribose-5-phosphate acetaldehyde-lyase	2dr5p_c <=> acald_c + g3p_c	1		1	(CV_3701)	(CV_3701)	Pentose Phosphate Pathway	1	-1000	1000	0	1.5		R01066		R01066	''			DRPA				(x(508))
rxn00361_c	rxn00361	rxn00361		ATP adenylylsulfate 3-phosphotransferase	atp_c + aps_c -> adp_c + paps_c	1		1	(CV_2104)	(CV_2104)	Sulfur metabolism	0	0	1000	0	1.5		R00509		R00509	''			AASPh				(x(236))	Reversibility changed based on iAF1260
rxn02804_c	rxn02804	rxn02804		myristoyl-CoA acetylCoA C-myristoyltransferase	accoa_c + tdcoa_c <=> coa_c + 3ohdcoa_c	1		1	(CV_2719) or (CV_2790)	(CV_2719) or (CV_2790)	Fatty acid metabolism	1	-1000	1000	0	2.2		R03991		R03991	''			ACACT7m				(x(322)) | (x(341))
rxn10162_c	rxn10162	rxn10162		Hexadecanoate transport via proton symport	h_e + hdca_e <=> h_c + hdca_c	1		1	(CV_3183) or (CV_2721)	(CV_3183) or (CV_2721)	Transport via Proton Symport	1	-1000	1000	0	1.5		None		None	''							(x(395)) | (x(324))
rxn00293_c	rxn00293	rxn00293		UTP N-acetyl-alpha-D-glucosamine-1-phosphate uridylyltransferase	acgam1p_c + utp_c -> ppi_c + uacgam_c	1		1	(CV_3103 or CV_0674) and (CV_0674)	(CV_3103 or CV_0674) and (CV_0674)	Aminosugars metabolism	0	0	1000	0	1.5		R00416		R00416	''			UAGDP				(x(387) | x(719)) & (x(719))
rxn05542_c	rxn05542	rxn05542		Dipeptide transport via ABC system ala-gly	atp_c + h2o_c + L_alagly_e -> h_c + adp_c + pi_c + L_alagly_c	1		1	(CV_3936) or (CV_1097) or (CV_3426) or (CV_2688)	(CV_3936) or (CV_1097) or (CV_3426) or (CV_2688)	Transport via ABC	0	0	1000	0	1.3		None		None	''							(x(554)) | (x(25)) | (x(439)) | (x(316))
rxn03538_c	rxn03538	rxn03538		Adenosylcobalamin 5-phosphate synthase	agdpcbi_c + rdmbzi_c -> gmp_c + adocbl_c	1		1	(CV_0491)	(CV_0491)	Porphyrin and chlorophyll metabolism	0	0	1000	0	1.3		R05223		R05223	''			ADOCBLS				(x(663))
rxn03181_c	rxn03181	rxn03181		ATP 2 3 2 3-tetrakis3-hydroxytetradecanoyl-D-glucosaminyl-beta-	atp_c + lipidAds_c -> adp_c + lipidA_c	1		1	(CV_3346)	(CV_3346)	Lipopolysaccharide biosynthesis	0	0	1000	0	1.4		R04657		R04657	''			TDSK				(x(417))
rxn00974_c	rxn00974	rxn00974		citrate hydro-lyase	cit_c -> h2o_c + acon_C_c	1		0	(CV_1121 and CV_2054) or (CV_2470)	(CV_1121 and CV_1121) or (CV_2470)	TCA Cycle	0	0	1000	0	2.2		R01325		R01325	''			ACONTa	ACONTa			(x(32) & x(225)) | (x(296))	As per Metacyc should be forward only					Add CV_2054 but directionality should be same
rxn05485_c	rxn05485	rxn05485		N-Acetyl-D-glucosamine transport via PEP Pyr PTS	pep_c + acgam_e -> pyr_c + acgam6p_c	1		1	(CV_0559) and (CV_3052 or CV_0816 or CV_0558 or CV_2311) and (CV_0559)	(CV_0559) and (CV_3052 or CV_0816 or CV_0558 or CV_2311) and (CV_0559)	Transport via PTS	0	0	1000	0	1.3		None		None	''							(x(686)) & (x(372) | x(732) | x(685) | x(271)) & (x(686))	As per Metacyc should be forward only
rxn00119_c	rxn00119	rxn00119		ATP nucleoside-phosphate phosphotransferase	atp_c + ump_c -> adp_c + udp_c	1		1	(CV_2198)	(CV_2198)	Pyrimidine metabolism	0	0	1000	0	1.5		R00158		R00158	''			UMPK				(x(247))
rxn04070_c	rxn04070	rxn04070		pyridoxine 5-phosphate synthase	dxyl5p_c + cpd08449_c -> 2 h_c + 2 h2o_c + pi_c + pdx5p_c	1		1	(CV_2070)	(CV_2070)	Vitamin B6 metabolism	0	0	1000	0	1.3		R05838		R05838	''			None				(x(229))
rxn01646_c	rxn01646	rxn01646		N-Ribosylnicotinamide orthophosphate ribosyltransferase	pi_c + rnam_c -> r1p_c + ncam_c	1		1	(CV_4097) or (CV_3698)	(CV_4097) or (CV_3698)	Nicotinate and nicotinamide metabolism	0	0	1000	0	1.5		R02294		R02294	''			PNP				(x(585)) | (x(505))	As per Metacyc should be forward only
rxn09685_c	rxn09685	rxn09685		deoxyuridine transport in via proton symport	h_e + duri_e <=> h_c + duri_c	1		1	(CV_2040) or (CV_1931)	(CV_2040) or (CV_1931)	Transport via Proton Symport	1	-1000	1000	0	1.3		None		None	''							(x(222)) | (x(203))
rxn05332_c	rxn05332	rxn05332		3R-3-Hydroxypalmitoyl-acyl-carrier-protein hydro-lyase	3hpalmACP_c <=> h2o_c + tpalm2eACP_c	1		1	(CV_3950) or (CV_2207)	(CV_3950) or (CV_2207)	Fatty acid biosynthesis	1	-1000	1000	0	1.5		R04544		R04544	''			3HAD160				(x(559)) | (x(251))
rxn03004_c	rxn03004	rxn03004		10-Formyltetrahydrofolate 5-phosphoribosylglycinamide	10fthf_c + gar_c -> h_c + thf_c + fgam_c	1		1	(CV_3616)	(CV_3616)	Purine metabolism	0	0	1000	0	1.5		R04325		R04325	''			FPGFTh				(x(477))	As per Metacyc should be forward only
rxn11544_c	rxn11544	rxn11544		Hydrogenobyrinate <=> Hydrogenobyrinate a c diamide	2 atp_c + h2o_c + 2 gln__L_c + hgbyr_c -> ppi_c + 2 adp_c + 2 glu__L_c + hgbam_c	1		1	(CV_1556)	(CV_1556)	Porphyrin and chlorophyll metabolism	0	0	1000	0	1.1		R05224		R05224	''			None				(x(120))	Reversibility changed based on iAF1260
rxn10147_c	rxn10147	rxn10147		Cob1alamin transport via ABC system	atp_c + h2o_c + cbl1_e -> h_c + adp_c + pi_c + cbl1_c	1		1	(CV_0496) and (CV_0494)	(CV_0496) and (CV_0494)	Transport via ABC	0	0	1000	0	1.3		None		None	''							(x(668)) & (x(666))
rxn00691_c	rxn00691	rxn00691		10-Formyltetrahydrofolate amidohydrolase	h2o_c + 10fthf_c -> h_c + for_c + thf_c	1		1	(CV_1926)	(CV_1926)	Folate biosynthesis	0	0	1000	0	1.3		R00944		R00944	''			FTHFD				(x(201))
rxn12638_c	rxn12638	rxn12638		aminopeptidase	h2o_c + gly_pro__L_c -> gly_c + h_c + pro__L_c	1		1	(CV_2694) or (CV_4047) or (CV_1176) or (CV_4047) or (CV_2397 or CV_2334) or (CV_2914)	(CV_2694) or (CV_4047) or (CV_1176) or (CV_4047) or (CV_2397 or CV_2334) or (CV_2914)	Recycling of Peptidoglycan Amino Acids	0	0	1000	0	1.1		None		None	''							(x(319)) | (x(579)) | (x(47)) | (x(579)) | (x(289) | x(276)) | (x(353))
rxn12643_c	rxn12643	rxn12643		aminopeptidase	h2o_c + ala_L_leu__L_c -> ala__L_c + leu__L_c	1		1	(CV_2694) or (CV_4047) or (CV_1176) or (CV_4047) or (CV_2397 or CV_2334) or (CV_2914)	(CV_2694) or (CV_4047) or (CV_1176) or (CV_4047) or (CV_2397 or CV_2334) or (CV_2914)	Recycling of Peptidoglycan Amino Acids	0	0	1000	0	1.1		None		None	''							(x(319)) | (x(579)) | (x(47)) | (x(579)) | (x(289) | x(276)) | (x(353))
rxn08558_c	rxn08558	rxn08558		glycerol-3-phosphate dehydrogenase demethylmenaquinone-8	glyc3p_c + 2dmmq8_c -> dhap_c + 2dmmql8_c	1		1	(CV_0254)	(CV_0254)	Oxidative phosphorylation	0	0	1000	0	1.3		None		None	''							(x(303))
rxn02264_c	rxn02264	rxn02264		Hydroxymethylbilane hydro-lyasecyclizing	hmbil_c -> h2o_c + uppg3_c	1		1	(CV_0052)	(CV_0052)	Porphyrin and chlorophyll metabolism	0	0	1000	0	1.3		R03165		R03165	''			UPP3S				(x(660))
rxn01225_c	rxn01225	rxn01225		Guanine aminohydrolase	h_c + h2o_c + gua_c -> nh4_c + xan_c	1		1	(CV_0578)	(CV_0578)	Purine metabolism	0	0	1000	0	2.2		R01676		R01676	''			None				(x(690))
rxn04989_c	rxn04989	rxn04989		L-phenylalanine tetrahydrobiopterin oxygen	o2_c + phe__L_c + thbpt_c -> tyr__L_c + cpd03897_c	1		1	(CV_3180)	(CV_3180)	Pterin metabolism	0	0	1000	0	4.2		R07211		R07211	''			None				(x(394))
rxn00985_c	rxn00985	rxn00985		ATP acetate phosphotransferase	adp_c + ppap_c -> h_c + atp_c + ppa_c	1		1	(CV_3745) or (CV_1531)	(CV_3745) or (CV_1531)	Propanoate metabolism	0	0	1000	0	2.2		R01353		R01353	''			APPTh				(x(517)) | (x(112))	Only in backward direction according to Metacyc
rxn00623_c	rxn00623	rxn00623		hydrogen-sulfide NADP oxidoreductase	4 h_c + so3_c + 3 nadph_c -> 3 h2o_c + 3 nadp_c + h2s_c	1		1	(CV_3573)	(CV_3573)	Sulfur metabolism	0	0	1000	0	1.5		R00858		R00858	''			SULR				(x(466))
rxn05627_c	rxn05627	rxn05627		nitrate transport in via proton symport	h_e + no3_e <=> h_c + no3_c	1		1	(CV_2228) or (CV_1219) or (CV_2544) or (CV_3907) or (CV_2545)	(CV_2228) or (CV_1219) or (CV_2544) or (CV_3907) or (CV_2545)	Transport via Proton Symport	1	-1000	1000	0	1		None		None	''							(x(253)) | (x(55)) | (x(310)) | (x(550)) | (x(311))
rxn08352_c	rxn08352	rxn08352		1-hydroxy-2-methyl-2-E-butenyl 4-diphosphate reductase dmpp	h_c + nadh_c + h2mb4p_c -> h2o_c + nad_c + dmpp_c	1		1	(CV_3567)	(CV_3567)	Isoprenoid Biosynthesis	0	0	1000	0	1.5		R08210		R08210	''			DMPPS				(x(463))
rxn08306_c	rxn08306	rxn08306		CDP-diacylglycerol synthetase n-C12 0	ctp_c + pa120_c -> ppi_c + cdpdddecg_c	1		1	(CV_2201)	(CV_2201)	Glycerolipid and Glycerophospholipid metabolism	0	0	1000	0	1.3		None		None	''							(x(248))
rxn00709_c	rxn00709	rxn00709		ATP uridine 5-phosphotransferase	atp_c + uri_c -> adp_c + ump_c	1		1	(CV_1085)	(CV_1085)	Pyrimidine metabolism	0	0	1000	0	1.5		R00964		R00964	''			URIK1				(x(23))	Reversibility changed based on iAF1260
rxn05535_c	rxn05535	rxn05535		Dipeptide transport via ABC system gly-met	atp_c + h2o_c + gly_met__L_e -> h_c + adp_c + pi_c + gly_met__L_c	1		1	(CV_3936) or (CV_1097) or (CV_3426) or (CV_2688)	(CV_3936) or (CV_1097) or (CV_3426) or (CV_2688)	Transport via ABC	0	0	1000	0	1.3		None		None	''							(x(554)) | (x(25)) | (x(439)) | (x(316))
rxn05360_c	rxn05360	rxn05360		4-methyl-3-oxo-hexanoyl-ACP NADP oxidoreductase	h_c + nadph_c + cpd11496_c -> nadp_c + cpd11497_c	1		1	(CV_3414) or (CV_3947) or (CV_2707) or (CV_2258) or (CV_1046) or (CV_3576) or (CV_1546) or (CV_3406)	(CV_3414) or (CV_3947) or (CV_2707) or (CV_2258) or (CV_1046) or (CV_3576) or (CV_1546) or (CV_3406)	Fatty acid biosynthesis	0	0	1000	0	1.1		None		None	''							(x(433)) | (x(556)) | (x(320)) | (x(260)) | (x(9)) | (x(468)) | (x(117)) | (x(428))
rxn00148_c	rxn00148	rxn00148		ATP pyruvate O2-phosphotransferase	adp_c + pep_c -> atp_c + pyr_c	1		1	(CV_0249)	(CV_0249)	Glycolysis/Gluconeogenesis	0	0	1000	0	4.2		R00200		R00200	''			PYK	PYK			(x(294))	Only in backward direction according to Metacyc
rxn00913_c	rxn00913	rxn00913		Guanosine 5-monophosphate phosphohydrolase	h2o_c + gmp_c -> h_c + pi_c + gsn_c	1		1	(CV_3083) or (CV_1743)	(CV_3083) or (CV_1743)	Purine metabolism	0	0	1000	0	1.5		R01227		R01227	''			GMP5N				(x(381)) | (x(172))
rxn00874_c	rxn00874	rxn00874		Acetyl-CoA acetyl-CoA C-acetyltransferase	accoa_c + btcoa_c <=> coa_c + 3ohcoa_c	1		1	(CV_2719 or CV_2790) or (CV_2088 or CV_2719 or CV_2790 or CV_4291)	(CV_2719 or CV_2790) or (CV_2088 or CV_2719 or CV_2790 or CV_4291)	Fatty acid metabolism	1	-1000	1000	0	2.2		R01177		R01177	''			ACACT2				(x(322) | x(341)) | (x(233) | x(322) | x(341) | x(640))
rxn05197_c	rxn05197	rxn05197		Uracil ion-coupled transport	h_e + ura_e <=> h_c + ura_c	1		1	(CV_3624) or (CV_2572)	(CV_3624) or (CV_2572)	Transport ion coupled	1	-1000	1000	0	1.3		None		None	''							(x(480)) | (x(313))
rxn06600_c	rxn06600	rxn06600		S-aminomethyldihydrolipoylprotein 6S-tetrahydrofolate	alpro_c + thf_c -> nh4_c + mlthf_c + dhlpro_c	1		1	(CV_3431) and (CV_3430)	(CV_3431) and (CV_3430)	Glycine, Serine and Threonine metabolism	0	0	1000	0	2.2		R04125		R04125	''			None				(x(442)) & (x(441))
rxn05438_c	rxn05438	rxn05438		14-methyl-trans-hexa-dec-2-enoyl-ACP NAD oxidoreductase A-specific	h_c + nadh_c + cpd11518_c -> nad_c + cpd11519_c	1		1	(CV_1583) or (CV_3743)	(CV_1583) or (CV_3743)	Fatty acid biosynthesis	0	0	1000	0	1.1		None		None	''							(x(134)) | (x(516))
rxn05289_c	rxn05289	rxn05289		TRDR	h_c + trdox_c + nadph_c -> trdrd_c + nadp_c	1		1	(CV_2813)	(CV_2813)	Pyrimidine metabolism	0	0	1000	0	1.5		R02016		R02016	''			TDSRh				(x(344))
rxn02000_c	rxn02000	rxn02000		dTDP-4-dehydro-6-deoxy-D-glucose 3 5-epimerase	dtdp4d6dg_c -> dtdp4d6dm_c	1		1	(CV_4013)	(CV_4013)	Streptomycin biosynthesis	0	0	1000	0	1.5		R06514		R06514	''			TDPDRE				(x(573))
rxn01977_c	rxn01977	rxn01977		alpha-D-Glucose 6-phosphate ketol-isomerase	g6p_c <=> g6p_B_c	1		1	(CV_0149) or (CV_2369)	(CV_0149) or (CV_2369)	Glycolysis/Gluconeogenesis	1	-1000	1000	0	1.3		R02739		R02739	''			G6PI				(x(84)) | (x(282))	As per Metacyc should be forward only, but for BIOLOG data needs to be reversible
rxn03249_c	rxn03249	rxn03249		S-Hydroxyhexanoyl-CoA NAD oxidoreductase	nad_c + 3hhcoa_c <=> h_c + nadh_c + 3ohcoa_c	1		1	(CV_2720)	(CV_2720)	Fatty acid metabolism	1	-1000	1000	0	1.1		R04748		R04748	''			HACD2				(x(323))
rxn00368_c	rxn00368	rxn00368		UTP cytidine 5-phosphotransferase	cytd_c + utp_c -> cmp_c + udp_c	1		1	(CV_1085)	(CV_1085)	Pyrimidine metabolism	0	0	1000	0	1.5		R00516		R00516	''			UTCY				(x(23))	As per Metacyc should be forward only
rxn03421_c	rxn03421	rxn03421		GTP 7 8-8 9-dihydrolase	cpd03519_c <=> cpd03666_c	1		1	(CV_1130) or (CV_2361)	(CV_1130) or (CV_2361)	Folate biosynthesis	1	-1000	1000	0	1.3		R05048		R05048	''			None				(x(36)) | (x(280))
rxn00867_c	rxn00867	rxn00867		L-Histidine ammonia-lyase	his__L_c -> nh4_c + urcan_c	1		1	(CV_0325)	(CV_0325)	Histidine metabolism	0	0	1000	0	1.5		R01168		R01168	''			None				(x(401))
rxn03540_c	rxn03540	rxn03540		adenosylcobyric acid synthase glutamine-hydrolysing	4 atp_c + 4 h2o_c + 4 gln__L_c + adcobdam_c -> 4 h_c + 4 adp_c + 4 pi_c + 4 glu__L_c + adcobhex_c	1		1	(CV_1576)	(CV_1576)	Porphyrin and chlorophyll metabolism	0	0	1000	0	1.5		R05225		R05225	''			ADCYRS				(x(133))	Reversibility changed based on iAF1260
rxn12635_c	rxn12635	rxn12635		aminopeptidase	h2o_c + gly_met__L_c <=> gly_c + met__L_c	1		1	(CV_2694) or (CV_4047) or (CV_1176) or (CV_4047) or (CV_2397 or CV_2334) or (CV_2914)	(CV_2694) or (CV_4047) or (CV_1176) or (CV_4047) or (CV_2397 or CV_2334) or (CV_2914)	Recycling of Peptidoglycan Amino Acids	1	-1000	1000	0	1.1		None		None	''							(x(319)) | (x(579)) | (x(47)) | (x(579)) | (x(289) | x(276)) | (x(353))
rxn00213_c	rxn00213	rxn00213		UTP alpha-D-glucose-1-phosphate uridylyltransferase	g1p_c + utp_c -> ppi_c + udpg_c	1		1	(CV_3901)	(CV_3901)	Pentose and Glucuronate Interconversions	0	0	1000	0	1.5		R00289		R00289	''			GALUi				(x(548))
rxn02934_c	rxn02934	rxn02934		2S 3S-3-Hydroxy-2-methylbutanoyl-CoA hydro-liase	3hmbcoa_c -> h2o_c + 2mb2coa_c	1		1	(CV_2720) or (CV_1553) or (CV_2485)	(CV_2720) or (CV_1553) or (CV_2485)	Valine, Leucine and Isoleucine degradation	0	0	1000	0	1.3		R04204		R04204	''			ECOAH9ir				(x(323)) | (x(118)) | (x(302))
rxn10131_c	rxn10131	rxn10131		arginine/ornithine antiporter	orn_c + arg__L_e <=> arg__L_c + orn_e	1		1	(CV_3783)	(CV_3783)	Transport via antiport	1	-1000	1000	0	1		None		None	''							(x(532))
rxn01145_c	rxn01145	rxn01145		Thymidylate 5-phosphohydrolase	h2o_c + dtmp_c -> h_c + pi_c + thymd_c	1		1	(CV_3083) or (CV_1743)	(CV_3083) or (CV_1743)	Pyrimidine metabolism	0	0	1000	0	1.5		R01569		R01569	''			NTD5				(x(381)) | (x(172))
rxn00493_c	rxn00493	rxn00493		L-Phenylalanine 2-oxoglutarate aminotransferase	glu__L_c + phpyr_c -> akg_c + phe__L_c	1		0	(CV_2382 and CV_0331) or (CV_0613 and CV_0038)	(CV_2382 or CV_0331 or CV_0613)	Phenylalanine, Tyrosine and Tryptophan biosynthesis	0	0	1000	0	2.2		R00694		R00694	''			PHETA1	PHETA1			(x(284) & x(405)) | (x(701) & x(838))						reversible in iDB149
rxn00173_c	rxn00173	rxn00173		Acetyl-CoA orthophosphate acetyltransferase	h_c + accoa_c + pi_c -> actp_c + coa_c	1		1	(CV_1530)	(CV_1530)	Pyruvate metabolism	0	0	1000	0	2.2		R00230		R00230	''			PTAr	PTAr			(x(111))	As per Metacyc should be forward only					reversible in iDB149
rxn08528_c	rxn08528	rxn08528		fumarate reductase	fum_c + 2dmmql8_c -> succ_c + 2dmmq8_c	1		1	((CV_1067 or CV_3369) and (CV_1068 or CV_3368)) or (CV_1067 or CV_3369) or (CV_1066 and CV_1065 and CV_3366 and CV_3367)	((CV_1067 or CV_3369) and (CV_1068 or CV_3368)) or (CV_1067 or CV_3369) or (CV_1066 and CV_1065 and CV_3366 and CV_3367)	TCA Cycle	0	0	1000	0	1.3		R02164		R02164	''			None				(x(14) | x(423)) & (x(15) | x(422)) | (x(14) | x(423)) | (x(13) & x(12) & x(420) & x(421))	Only in forward direction according to Biocyc
rxn01509_c	rxn01509	rxn01509		ATP dGMP phosphotransferase	atp_c + dgmp_c -> adp_c + dgdp_c	1		1	(CV_3770) or (CV_1849)	(CV_3770) or (CV_1849)	Purine metabolism	0	0	1000	0	1.3		R02090		R02090	''			DGK1				(x(526)) | (x(193))	Only forward to avoid futile cycles
rxn03240_c	rxn03240	rxn03240		S-3-Hydroxyhexadecanoyl-CoA hydro-lyase	3hhdcoa_c <=> h2o_c + hdd2coa_c	1		1	(CV_2720) or (CV_1553) or (CV_2485)	(CV_2720) or (CV_1553) or (CV_2485)	Fatty acid metabolism	1	-1000	1000	0	1.1		R04738		R04738	''			ECOAH7				(x(323)) | (x(118)) | (x(302))
rxn00789_c	rxn00789	rxn00789		1-5-Phospho-D-ribosyl-ATP pyrophosphate phosphoribosyl-transferase	atp_c + prpp_c -> ppi_c + prbatp_c	1		1	(CV_0610 or CV_3529)	(CV_0610 or CV_3529)	Histidine metabolism	0	0	1000	0	1.5		R01071		R01071	''			ATPPRT				(x(699) | x(454))
rxn05390_c	rxn05390	rxn05390		7-methyl-3-hydroxy-octanoyl-ACP hydro-lyase	cpd11526_c <=> h2o_c + cpd11527_c	1		1	(CV_3950) or (CV_2207)	(CV_3950) or (CV_2207)	Fatty acid biosynthesis	1	-1000	1000	0	1.5		None		None	''							(x(559)) | (x(251))
rxn10481_c	rxn10481	rxn10481		Copper transport via ABC system	atp_c + h2o_c + cu2_e -> h_c + adp_c + pi_c + cu2_c	1		1	(CV_2042) or (CV_3217) or (CV_1265) or (CV_1154) or (CV_2748)	(CV_2042) or (CV_3217) or (CV_1265) or (CV_1154) or (CV_2748)	Transport via ABC	0	0	1000	0	1		None		None	''							(x(223)) | (x(400)) | (x(62)) | (x(41)) | (x(330))
rxn06077_c	rxn06077	rxn06077		L-methionine oxidized-thioredoxin S-oxidoreductase	h2o_c + trdox_c + met__L_c <=> trdrd_c + metsox_S__L_c	1		1	(CV_2325)	(CV_2325)	Methionine metabolism	1	-1000	1000	0	1.1		R02025		R02025	''			METSOXR1				(x(274))
rxn02895_c	rxn02895	rxn02895		5-Phospho-D-ribosylamine glycine ligase ADP-forming	gly_c + atp_c + pram_c -> h_c + adp_c + pi_c + gar_c	1		1	(CV_0547)	(CV_0547)	Purine metabolism	0	0	1000	0	1.5		R04144		R04144	''			PPRGL				(x(682))
rxn05256_c	rxn05256	rxn05256		APSPTi	trdrd_c + aps_c -> trdox_c + so3_c + amp_c	1		1	(CV_3574) and (CV_3574)	(CV_3574) and (CV_3574)	Inorganic Sulfur Assimilation/Cysteine Biosynthesis	0	0	1000	0	1.1		R07176		R07176	''			APSR				(x(467)) & (x(467))
rxn06075_c	rxn06075	rxn06075		2-Deoxyuridine 5-diphosphate oxidized-thioredoxin	trdrd_c + udp_c -> h2o_c + trdox_c + dudp_c	1		1	(CV_2284) or (CV_2287)	(CV_2284) or (CV_2287)	Pyrimidine metabolism	0	0	1000	0	1.5		R02018		R02018	''			RNDR4				(x(261)) | (x(262))
rxn05405_c	rxn05405	rxn05405		15-methyl-3-oxo-hexa-decanoyl-ACP NADP oxidoreductase	h_c + nadph_c + cpd11541_c -> nadp_c + cpd11542_c	1		1	(CV_3414) or (CV_3947) or (CV_2707) or (CV_2258) or (CV_1046) or (CV_3576) or (CV_1546) or (CV_3406)	(CV_3414) or (CV_3947) or (CV_2707) or (CV_2258) or (CV_1046) or (CV_3576) or (CV_1546) or (CV_3406)	Fatty acid biosynthesis	0	0	1000	0	1.1		None		None	''							(x(433)) | (x(556)) | (x(320)) | (x(260)) | (x(9)) | (x(468)) | (x(117)) | (x(428))
rxn00679_c	rxn00679	rxn00679		2-Methylcitrate oxaloacetate-lyase	h2o_c + oaa_c + ppcoa_c -> h_c + coa_c + 2mcit_c	1		1	(CV_2056)	(CV_2056)	Propanoate metabolism	0	0	1000	0	1.5		R00931		R00931	''			MCITS				(x(226))
rxn03951_c	rxn03951	rxn03951		NAD-dependent threonine 4-phosphate dehydrogenase	nad_c + phthr_c -> h_c + nadh_c + cpd04539_c	1		1	(CV_4231)	(CV_4231)	Vitamin B6 metabolism	0	0	1000	0	1.3		R05681		R05681	''			None				(x(632))
rxn05327_c	rxn05327	rxn05327		Decanoyl-acyl-carrier protein malonyl-CoA	h_c + nadh_c + tdec2eACP_c -> nad_c + dcaACP_c	1		1	(CV_1583) or (CV_3743)	(CV_1583) or (CV_3743)	Fatty acid biosynthesis	0	0	1000	0	2.2		R04961		R04961	''			EAR100x				(x(134)) | (x(516))
rxn00365_c	rxn00365	rxn00365		ATP cytidine 5-phosphotransferase	atp_c + cytd_c -> adp_c + cmp_c	1		1	(CV_1085)	(CV_1085)	Pyrimidine metabolism	0	0	1000	0	1.5		R00513		R00513	''			CYTDK1				(x(23))	Reversibility changed based on iAF1260
rxn05318_c	rxn05318	rxn05318		ADNt2r	h_e + adn_e <=> h_c + adn_c	1		1	(CV_2040) or (CV_1931)	(CV_2040) or (CV_1931)	Transport	1	-1000	1000	0	1.3		None		None	''			ADNt2				(x(222)) | (x(203))
rxn10474_c	rxn10474	rxn10474		cobalt transport in/out via permease no H	cobalt2_e -> cobalt2_c	1		1	(CV_1263)	(CV_1263)	Transport via permease	0	0	1000	0	1.3		None		None	''							(x(60))
rxn05404_c	rxn05404	rxn05404		13-methyl-tetra-decanoyl-ACP malonyl-acyl-carrier-protein C-acyltransferase decarboxylating	h_c + malACP_c + cpd11540_c -> co2_c + ACP_c + cpd11541_c	1		1	(CV_3412 or CV_3948 or CV_1541 or CV_3949) and (CV_3416 or CV_1096 or CV_0805)	(CV_3412 or CV_3948 or CV_1541 or CV_3949) and (CV_3416 or CV_1096 or CV_0805)	Fatty acid biosynthesis	0	0	1000	0	1.5		None		None	''							(x(432) | x(557) | x(115) | x(558)) & (x(435) | x(24) | x(730))
rxn05462_c	rxn05462	rxn05462		trans-Octodec-2-enoyl-ACP hydro-lyase	cpd11571_c -> h2o_c + cpd11572_c	1		1	(CV_3950) or (CV_2207)	(CV_3950) or (CV_2207)	Fatty acid biosynthesis	0	0	1000	0	1.5		None		None	''							(x(559)) | (x(251))
rxn08797_c	rxn08797	rxn08797		Lysophospholipase L1 2-acylglycerophosphotidate n-C14 0	h2o_c + 1tdecg3p_c -> h_c + glyc3p_c + ttdca_c	1		1	(CV_0167)	(CV_0167)	Glycerolipid and Glycerophospholipid metabolism	0	0	1000	0	1.3		None		None	''							(x(138))
rxn01102_c	rxn01102	rxn01102		ATP R-glycerate 3-phosphotransferase	atp_c + glyc__R_c -> adp_c + 3pg_c	1		1	(CV_3660)	(CV_3660)	Glycine, Serine and Threonine metabolism	0	0	1000	0	1.1		R01514		R01514	''			GLYCK				(x(490))	Reversibility changed based on iAF1260
rxn10336_c	rxn10336	rxn10336		stearoyl-cardiolipin synthase	2 pg180_c -> glyc_c + cpd15793_c	1		1	(CV_4039)	(CV_4039)	Glycerolipid and Glycerophospholipid metabolism	0	0	1000	0	1.5		None		None	''							(x(576))
rxn01643_c	rxn01643	rxn01643		L-Aspartate-4-semialdehyde NADP oxidoreductase phosphorylating	nadph_c + 4pasp_c -> pi_c + nadp_c + aspsa_c	1		1	(CV_2767) or (CV_2768)	(CV_2767) or (CV_2768)	Lysine Biosynthesis	0	0	1000	0	1.3		R02291		R02291	''			ASAD				(x(336)) | (x(337))
rxn01275_c	rxn01275	rxn01275		ATP D-Gluconate 6-phosphotransferase	atp_c + glcn_c -> adp_c + 6pgc_c	1		1	(CV_2957)	(CV_2957)	Pentose Phosphate Pathway	0	0	1000	0	1.3		R01737		R01737	''			GNK				(x(355))	Reversibility changed based on iAF1260
rxn02005_c	rxn02005	rxn02005		trehalose transport via PEP Pyr PTS	pep_c + tre_e -> pyr_c + tre6p_c	1		1	(CV_3300) and (CV_3052 or CV_0816 or CV_0558 or CV_2311) and (CV_3300)	(CV_3300) and (CV_3052 or CV_0816 or CV_0558 or CV_2311) and (CV_3300)	Transport via PTS	0	0	1000	0	1		None		None	''							(x(410)) & (x(372) | x(732) | x(685) | x(271)) & (x(410))	As per Metacyc should be forward only
rxn01653_c	rxn01653	rxn01653		5-Formyltetrahydrofolate cyclo-ligase ADP-forming	atp_c + 5fthf_c -> adp_c + pi_c + methf_c	1		1	(CV_0499)	(CV_0499)	One carbon pool by folate	0	0	1000	0	1.3		R02301		R02301	''			FTCL				(x(669))
rxn01671_c	rxn01671	rxn01671		ATP N-ribosylnicotinamide 5-phosphotransferase	atp_c + rnam_c -> adp_c + nmn_c	1		1	(CV_1690)	(CV_1690)	Nicotinate and nicotinamide metabolism	0	0	1000	0	1.1		R02324		R02324	''			RNMK				(x(165))	Reversibility changed based on iAF1260
rxn01362_c	rxn01362	rxn01362		Orotidine-5-phosphate pyrophosphate phosphoribosyltransferase	prpp_c + orot_c -> ppi_c + orot5p_c	1		1	(CV_4248)	(CV_4248)	Pyrimidine metabolism	0	0	1000	0	1.5		R01870		R01870	''			ORPT				(x(633))
rxn09106_c	rxn09106	rxn09106		phosphatidylglycerol phosphate phosphatase n-C18 0	h2o_c + pgp180_c -> h_c + pi_c + pg180_c	1		1	(CV_2393)	(CV_2393)	Glycerolipid and Glycerophospholipid metabolism	0	0	1000	0	1.3		None		None	''							(x(288))
rxn06493_c	rxn06493	rxn06493		dihydrolipoylprotein NAD oxidoreductase	nad_c + dhlpro_c <=> h_c + nadh_c + lpro_c	1		1	(CV_2037) or (CV_3430) or (CV_3430 and CV_3429)	(CV_2037) or (CV_3430) or (CV_3430 and CV_3429)	Glycine, Serine and Threonine metabolism	1	-1000	1000	0	2.2		R03815		R03815	''			GCCc				(x(221)) | (x(441)) | (x(441) & x(440))
rxn02402_c	rxn02402	rxn02402		Nicotinate-nucleotide pyrophosphate phosphoribosyltransferase	2 h_c + prpp_c + quln_c -> ppi_c + co2_c + nicrnt_c	1		1	(CV_1588)	(CV_1588)	Nicotinate and nicotinamide metabolism	0	0	1000	0	1.5		R03348		R03348	''			NNDPR				(x(136))
rxn03243_c	rxn03243	rxn03243		Decanoyl-CoA acetyl-CoA C-acyltransferase	accoa_c + dcacoa_c <=> coa_c + 3oddcoa_c	1		1	(CV_2719) or (CV_2790)	(CV_2719) or (CV_2790)	Fatty acid metabolism	1	-1000	1000	0	2.2		R04742		R04742	''			ACACT5m				(x(322)) | (x(341))
rxn05375_c	rxn05375	rxn05375		10-methyl-dodecanoyl-ACP malonyl-acyl-carrier-protein C-acyltransferase decarboxylating	h_c + malACP_c + cpd11511_c -> co2_c + ACP_c + cpd11512_c	1		1	(CV_3412 or CV_3948 or CV_1541 or CV_3949) and (CV_3416 or CV_1096 or CV_0805)	(CV_3412 or CV_3948 or CV_1541 or CV_3949) and (CV_3416 or CV_1096 or CV_0805)	Fatty acid biosynthesis	0	0	1000	0	1.5		None		None	''							(x(432) | x(557) | x(115) | x(558)) & (x(435) | x(24) | x(730))
rxn00351_c	rxn00351	rxn00351		gamma-L-Glutamyl-L-cysteine glycine ligase ADP-forming	gly_c + atp_c + glucys_c -> h_c + adp_c + pi_c + gthrd_c	1		1	(CV_4275)	(CV_4275)	Glutathione metabolism	0	0	1000	0	2.2		R00497		R00497	''			None				(x(638))
rxn02811_c	rxn02811	rxn02811		3-Isopropylmalate hydro-lyase	h2o_c + 2ippm_c -> 3c2hmp_c	1		1	(CV_2784 or CV_2169) and (CV_2782 or CV_2168)	(CV_2784 or CV_2169) and (CV_2782 or CV_2168)	Valine, Leucine and Isoleucine Biosynthesis	0	0	1000	0	2.2		R04001		R04001	''			IMDHT_3c2hmp				(x(340) | x(239)) & (x(339) | x(238))
rxn01286_c	rxn01286	rxn01286		D-Glyceraldehyde NAD oxidoreductase	h2o_c + nad_c + glyald_c -> 2 h_c + nadh_c + glyc__R_c	1		1	(CV_1222)	(CV_1222)	Glycerolipid and Glycerophospholipid metabolism	0	0	1000	0	1.5		R01752		R01752	''			GLYALDDr				(x(56))
rxn05610_c	rxn05610	rxn05610		D-mannose transport via PEP Pyr PTS	pep_c + man_e -> pyr_c + man6p_c	1		1	(CV_3052 or CV_0816 or CV_0558 or CV_2311)	(CV_3052 or CV_0816 or CV_0558 or CV_2311)	Transport via PTS	0	0	1000	0	1.5		None		None	''							(x(372) | x(732) | x(685) | x(271))	As per Metacyc should be forward only
rxn00199_c	rxn00199	rxn00199		Oxalosuccinate NADP oxidoreductase decarboxylating	h_c + mDB_oxasucc_c -> co2_c + akg_c	1		1	(CV_3664)	(CV_3664)	TCA Cycle	0	0	1000	0	1.5		R00268		R00268	''			ICDHyr	ICDHyr			(x(491))	Only in forward direction according to Biocy					ICDHyr part 2
rxn01705_c	rxn01705	rxn01705		dCTP cytidine 5-phosphotransferase	dctp_c + cytd_c -> dcdp_c + cmp_c	1		1	(CV_1085)	(CV_1085)	Pyrimidine metabolism	0	0	1000	0	1.5		R02371		R02371	''			DCTCP				(x(23))	As per Metacyc should be forward only
rxn01019_c	rxn01019	rxn01019		Carbamoyl-phosphate L-ornithine carbamoyltransferase	cbp_c + orn_c -> 2 h_c + pi_c + citr__L_c	1		1	(CV_3781) or (CV_1993)	(CV_3781) or (CV_1993)	Urea cycle and metabolism of amino groups	0	0	1000	0	1.3		R01398		R01398	''			OCBT				(x(530)) | (x(213))
rxn00412_c	rxn00412	rxn00412		UTP ammonia ligaseADP-forming	atp_c + h2o_c + gln__L_c + utp_c -> 2 h_c + adp_c + pi_c + glu__L_c + ctp_c	1		1	(CV_3457)	(CV_3457)	Pyrimidine metabolism	0	0	1000	0	1.5		R00573		R00573	''			CTPS2				(x(447))
rxn03167_c	rxn03167	rxn03167		2-Amino-4-hydroxy-6-erythro-1 2 3-trihydroxypropyl	3 h2o_c + ahdt_c -> 3 h_c + 3 pi_c + dhnpt_c	1		1	(CV_1514) or (CV_0516) or (CV_1513)	(CV_1514) or (CV_0516) or (CV_1513)	Folate biosynthesis	0	0	1000	0	2.2		R04620		R04620	''			AKP1				(x(109)) | (x(674)) | (x(108))
rxn05457_c	rxn05457	rxn05457		tetradecanoyl-ACP acyl-carrier-protein transferase	coa_c + myrsACP_c <=> ACP_c + tdcoa_c	1		1	(CV_3415)	(CV_3415)	Fatty acid biosynthesis	1	-1000	1000	0	1.3		None		None	''							(x(434))
rxn10094_c	rxn10094	rxn10094		S-adenosylmethione 2-demethylmenaquinone methyltransferase	amet_c + 2dmmq8_c -> h_c + mqn8_c + ahcys_c	1		1	(CV_0989)	(CV_0989)	Ubiquinone biosynthesis	0	0	1000	0	1.3		R04993		R04993	''			None				(x(783))
rxn08310_c	rxn08310	rxn08310		CDP-diacylglycerol synthetase n-C16 1	ctp_c + pa161_c -> ppi_c + cdpdhdec9eg_c	1		1	(CV_2201)	(CV_2201)	Glycerolipid and Glycerophospholipid metabolism	0	0	1000	0	1.3		None		None	''							(x(248))
rxn03917_c	rxn03917	rxn03917		sedoheptulose 7-phosphate isomerase	s7p_c -> gmhep7p_c	1		1	(CV_0655)	(CV_0655)	Lipopolysaccharide biosynthesis	0	0	1000	0	1.3		R05645		R05645	''			S7PI				(x(710))
rxn05573_c	rxn05573	rxn05573		D-glucose transport in via proton symport	h_e + glc__D_e -> h_c + glc__D_c	1		1	(CV_2248)	(CV_2248)	Transport via Proton Symport	0	0	1000	0	1.5		None		None	''			GLCt2	GLCt2			(x(258))	As per Metacyc should be forward only
rxn03135_c	rxn03135	rxn03135		Imidazole-glycerol-3-phosphate synthase	gln__L_c + prlp_c -> h_c + glu__L_c + aicar_c + eig3p_c	1		1	(CV_0616) and (CV_0618)	(CV_0616) and (CV_0618)	Histidine metabolism	0	0	1000	0	1.1		R04558		R04558	''			IG3PS				(x(703)) & (x(705))
rxn00469_c	rxn00469	rxn00469		N2-Acetyl-L-ornithine amidohydrolase	h2o_c + acorn_c <=> ac_c + orn_c	1		1	(CV_2379)	(CV_2379)	Urea cycle and metabolism of amino groups	1	-1000	1000	0	1.3		R00669		R00669	''			ACODA				(x(283))
rxn05655_c	rxn05655	rxn05655		sucrose transport via PEP Pyr PTS	pep_c + sucr_e -> pyr_c + suc6p_c	1		1	(CV_3052 or CV_0816 or CV_0558 or CV_2311)	(CV_3052 or CV_0816 or CV_0558 or CV_2311)	Transport via PTS	0	0	1000	0	1.5		None		None	''							(x(372) | x(732) | x(685) | x(271))	As per Metacyc should be forward only
rxn12512_c	rxn12512	rxn12512		R-4-Phosphopantothenate L-cysteine ligase	atp_c + cys__L_c + 4ppan_c -> ppi_c + 4ppcys_c + amp_c	1		1	(CV_3080)	(CV_3080)	Pantothenate and CoA biosynthesis	0	0	1000	0	1.4		R04230		R04230	''			PPNCL3				(x(379))
rxn09272_c	rxn09272	rxn09272		succinate dehydrogenase irreversible	succ_c + q8_c <=> fum_c + q8h2_c	1		1	((CV_1067 or CV_3369) and (CV_1068 or CV_3368)) or (CV_1066 and CV_1065 and CV_3366 and CV_3367) or (CV_1067 or CV_3369)	((CV_1067 or CV_3369) and (CV_1068 or CV_3368)) or (CV_1066 and CV_1065 and CV_3366 and CV_3367) or (CV_1067 or CV_3369)	TCA Cycle	1	-1000	1000	0	1.3		R02164		R02164	''			FRD7	FRD7			(x(14) | x(423)) & (x(15) | x(422)) | (x(13) & x(12) & x(420) & x(421)) | (x(14) | x(423))	Only in forward direction according to Biocy					irrev in iDB149
rxn00686_c	rxn00686	rxn00686		5 6 7 8-Tetrahydrofolate NADP oxidoreductase	nadp_c + thf_c <=> h_c + nadph_c + dhf_c	1		1	(CV_3295 or CV_1028) or (CV_4132)	(CV_3295 or CV_1028) or (CV_4132)	Folate biosynthesis	1	-1000	1000	0	1.3		R00939		R00939	''			DHFR				(x(408) | x(7)) | (x(592))
rxn08201_c	rxn08201	rxn08201		CDP-Diacylglycerol pyrophostatase n-C14 1	h2o_c + cdpdtdec7eg_c -> cmp_c + pa141_c	1		1	(CV_4315)	(CV_4315)	Glycerolipid and Glycerophospholipid metabolism	0	0	1000	0	1.3		None		None	''							(x(643))
rxn00791_c	rxn00791	rxn00791		N-5-Phospho-D-ribosylanthranilate pyrophosphate	prpp_c + anth_c -> ppi_c + pran_c	1		1	(CV_2173)	(CV_2173)	Phenylalanine, Tyrosine and Tryptophan biosynthesis	0	0	1000	0	1.5		R01073		R01073	''			ANPRT	ANPRT			(x(241))
rxn05494_c	rxn05494	rxn05494		D-alanine transport in via proton symport	h_e + ala__D_e <=> h_c + ala__D_c	1		1	(CV_1138)	(CV_1138)	Transport via Proton Symport	1	-1000	1000	0	1.5		None		None	''							(x(40))
rxn10120_c	rxn10120	rxn10120		Nitrate reductase Ubiquinol-8	2 h_c + q8h2_c + no3_c -> h2o_c + 2 h_e + q8_c + no2_c	1		1	(CV_2543 and CV_2542 and CV_2540 and CV_2541) or (CV_2229)	(CV_2543 and CV_2542 and CV_2540 and CV_2541) or (CV_2229)	Nitrate and nitrite ammonification	0	0	1000	0	1.3		None		None	''							(x(309) & x(308) & x(306) & x(307)) | (x(255))
rxn01636_c	rxn01636	rxn01636		N2-Acetyl-L-ornithine L-glutamate N-acetyltransferase	glu__L_c + acorn_c <=> orn_c + acglu_c	1		1	(CV_0478)	(CV_0478)	Urea cycle and metabolism of amino groups	1	-1000	1000	0	1.3		R02282		R02282	''			ORNTAC				(x(659))
rxn02303_c	rxn02303	rxn02303		Coproporphyrinogen oxygen oxidoreductasedecarboxylating	2 h_c + o2_c + cpppg3_c -> 2 co2_c + 2 h2o_c + pppg9_c	1		1	(CV_0757)	(CV_0757)	Porphyrin and chlorophyll metabolism	0	0	1000	0	1.5		R03220		R03220	''			CPPPGO				(x(725))
rxn12850_c	rxn12850	rxn12850		Gly-Phe ABC transporters	atp_c + h2o_c + gly_phe__L_e -> h_c + adp_c + pi_c + gly_phe__L_c	1		1	(CV_3936) or (CV_1097) or (CV_3426) or (CV_2688)	(CV_3936) or (CV_1097) or (CV_3426) or (CV_2688)	Transport via ABC	0	0	1000	0	1.3		None		None	''							(x(554)) | (x(25)) | (x(439)) | (x(316))
rxn00778_c	rxn00778	rxn00778		D-Ribose 1 5-phosphomutase	r1p_c -> r5p_c	1		1	(CV_3699)	(CV_3699)	Pentose Phosphate Pathway	0	0	1000	0	2.2		R01057		R01057	''			None				(x(506))	As per Metacyc should be forward only
rxn10260_c	rxn10260	rxn10260		anteisoheptadecanoyl-CDPdiacylglycerol sn-glycerol-3-phosphate 3-phosphatidyltransferase	glyc3p_c + cpd15684_c -> cmp_c + cpd15717_c	1		1	(CV_1306)	(CV_1306)	Glycerolipid and Glycerophospholipid metabolism	0	0	1000	0	1.3		None		None	''							(x(68))
rxn06672_c	rxn06672	rxn06672		biotin-carboxyl-carrier-protein carbon-dioxide ligase ADP-forming	atp_c + hco3_c + btnCCP_c -> h_c + adp_c + pi_c + cbtnCCP_c	1		1	(CV_1807 or CV_0985) and (CV_0986)	(CV_1807 or CV_0985) and (CV_0986)	Fatty acid biosynthesis	0	0	1000	0	1.5		R04385		R04385	''			BTNC				(x(185) | x(780)) & (x(781))
rxn04047_c	rxn04047	rxn04047		precorrin-3B C17-methyltransferase	amet_c + copre3_c <=> h_c + ahcys_c + copre4_c	1		1	(CV_1562)	(CV_1562)	Porphyrin and chlorophyll metabolism	1	-1000	1000	0	1.3		R05809		R05809	''			CODSCL3MT				(x(122))
rxn05177_c	rxn05177	rxn05177		Thiamin-ABC transport	atp_c + h2o_c + thm_e -> h_c + adp_c + pi_c + thm_c	1		1	(CV_3164) and (CV_3162 or CV_1679)	(CV_3164) and (CV_3162 or CV_1679)	Transport via ABC	0	0	1000	0	1		None		None	''			THMabc				(x(391)) & (x(390) | x(164))
rxn01353_c	rxn01353	rxn01353		ATP nucleoside-diphosphate phosphatransferase	atp_c + dgdp_c -> adp_c + dgtp_c	1		1	(CV_3542)	(CV_3542)	Purine metabolism	0	0	1000	0	1.5		R01857		R01857	''			ATDGDm				(x(457))	Only forward to avoid futile cycles
rxn00077_c	rxn00077	rxn00077		ATP NAD 2-phosphotransferase	atp_c + nad_c -> adp_c + nadp_c	1		1	(CV_2322)	(CV_2322)	Nicotinate and nicotinamide metabolism	0	0	1000	0	1.5		R00104		R00104	''			NADK				(x(273))	Reversibility changed based on iAF1260
rxn05379_c	rxn05379	rxn05379		12-methyl-tetra-decanoyl-ACP malonyl-acyl-carrier-protein C-acyltransferase decarboxylating	h_c + malACP_c + cpd11515_c -> co2_c + ACP_c + cpd11516_c	1		1	(CV_3412 or CV_3948 or CV_1541 or CV_3949) and (CV_3416 or CV_1096 or CV_0805)	(CV_3412 or CV_3948 or CV_1541 or CV_3949) and (CV_3416 or CV_1096 or CV_0805)	Fatty acid biosynthesis	0	0	1000	0	1.5		None		None	''							(x(432) | x(557) | x(115) | x(558)) & (x(435) | x(24) | x(730))
rxn05667_c	rxn05667	rxn05667		Urea transport via facilitate diffusion	urea_e <=> urea_c	1		0	''		Transport via diffusion	1	-1000	1000	0	1.1		None		None	''
rxn01213_c	rxn01213	rxn01213		Dimethylallyl-diphosphate isopentenyl-diphosphate	ipdp_c + dmpp_c -> ppi_c + grdp_c	1		1	(CV_2691 or CV_3954) and (CV_0847 or CV_2691 or CV_3954) and (CV_2691 or CV_3954) and (CV_2691 or CV_3954)	(CV_2691 or CV_3954) and (CV_0847 or CV_2691 or CV_3954) and (CV_2691 or CV_3954) and (CV_2691 or CV_3954)	Terpenoid biosynthesis	0	0	1000	0	1.3		R01658		R01658	''			DMATT			(x(317) | x(560)) & (x(738) | x(317) | x(560)) & (x(317) | x(560)) & (x(317) | x(560))	(x(317) | x(560)) & (x(738) | x(317) | x(560)) & (x(317) | x(560)) & (x(317) | x(560))
rxn05384_c	rxn05384	rxn05384		3-methylbutanoyl-ACP malonyl-acyl-carrier-protein C-acyltransferase decarboxylating	h_c + malACP_c + cpd11520_c -> co2_c + ACP_c + cpd11521_c	1		1	(CV_3412 or CV_3948 or CV_1541 or CV_3949) and (CV_3416 or CV_1096 or CV_0805)	(CV_3412 or CV_3948 or CV_1541 or CV_3949) and (CV_3416 or CV_1096 or CV_0805)	Fatty acid biosynthesis	0	0	1000	0	1.5		None		None	''							(x(432) | x(557) | x(115) | x(558)) & (x(435) | x(24) | x(730))
rxn01917_c	rxn01917	rxn01917		ATP N-acetyl-L-glutamate 5-phosphotransferase	h_c + atp_c + acglu_c -> adp_c + acg5p_c	1		1	(CV_3921)	(CV_3921)	Urea cycle and metabolism of amino groups	0	0	1000	0	1.3		R02649		R02649	''			ACGK			(x(552))	(x(552))
rxn01100_c	rxn01100	rxn01100		ATP 3-phospho-D-glycerate 1-phosphotransferase	h_c + atp_c + 3pg_c <=> adp_c + 13dpg_c	1		1	(CV_0189)	(CV_0189)	Glycolysis/Gluconeogenesis	1	-1000	1000	0	2.2		R01512		R01512	''			PGK	PGK		(x(186))	(x(186))	Reversibility changed based on iAF1260
rxn05389_c	rxn05389	rxn05389		7-methyl-3-oxo-octanoyl-ACP NADP oxidoreductase	h_c + nadph_c + cpd11525_c <=> nadp_c + cpd11526_c	1		1	(CV_3414) or (CV_3947) or (CV_2707) or (CV_2258) or (CV_1046) or (CV_3576) or (CV_1546) or (CV_3406)	(CV_3414) or (CV_3947) or (CV_2707) or (CV_2258) or (CV_1046) or (CV_3576) or (CV_1546) or (CV_3406)	Fatty acid biosynthesis	1	-1000	1000	0	1.1		None		None	''							(x(433)) | (x(556)) | (x(320)) | (x(260)) | (x(9)) | (x(468)) | (x(117)) | (x(428))
rxn05163_c	rxn05163	rxn05163		Putrescine-ABC transport	atp_c + h2o_c + ptrc_e -> h_c + adp_c + pi_c + ptrc_c	1		1	(CV_0925 or CV_4213 or CV_4099) and (CV_4101) and (CV_1678 or CV_4102) and (CV_4100)	(CV_0925 or CV_4213 or CV_4099) and (CV_4101) and (CV_1678 or CV_4102) and (CV_4100)	Transport via ABC	0	0	1000	0	1.3		None		None	''						(x(751) | x(628) | x(586)) & (x(588)) & (x(163) | x(589)) & (x(587))	(x(751) | x(628) | x(586)) & (x(588)) & (x(163) | x(589)) & (x(587))
[truncated: 548 more rows]

## Sheet: genes
PEG ID	CV_locus	GENE NAME	GENE DETAILS	OTHERS	From SEED Information	Start	Stop	Direction	Reactions	Remarks
[truncated: 998 more rows]

[truncated: 10 more sheets: pegTOcv, GeneLiterature, BIOLOG, EXMets, singlegendeletion, SyntheticLethalPairs, SyntheticSickPairs, FVACVstrains, FVAWTwithAntibiotic, FVAwithNOX]
